# Supplementary material
Source: PubMed Central journal article supplement (PMC4000844)
Supplement: 1404354111_sapp.pdf [file 1404354111_sapp.pdf]

## SI Materials and Methods

### *Mice*

*TPO<sup>Tg</sup>* (1) and *Mpl<sup>-/-</sup>* (2) mice have been previously described. A targeting vector was constructed for generation of a modified *Mpl* allele via homologous recombination in embryonic stem (ES) cells in which an internal ribosome entry site (IRES)-GFP-FRT-PGK-neo-FRT-loxP cassette was inserted immediately downstream of the stop codon in exon 12, along with a loxP site in intron 10 (Fig 1). Chimeric mice were generated from an ES cell clone bearing the targeted locus and heterozygous offspring generated on a C57BL/6 background. The PGK-neo sequence was removed by intercrossing with transgenic mice ubiquitously expressing Flp recombinase (3). The resultant allele acts as a GFP reporter for expression from the *Mpl* locus (*Mpl<sup>fl/fl</sup>*). When bred with deleter cre-expressing mice (4), germline deletion of exons 11 and 12, which encode the intracellular domain of the receptor, results in a null allele (*Mpl<sup>Delcre/Delcre</sup>*). Specific inactivation of *Mpl* in megakaryocytes and platelets (*Mpl<sup>PF4cre/PF4cre</sup>*) was achieved using the previously published *PF4-cre* mice (5). Experiments were performed using procedures approved by The Walter and Eliza Hall Institute of Medical Research Animal Ethics Committee.

### *Haematology and Histology*

Analysis of erythrocytes and platelets for flow cytometry was performed after blood was suspended in buffered saline glucose citrate buffer (116 mM NaCl, 13.6 mM trisodium citrate, 8.6 mM Na<sub>2</sub>HPO<sub>4</sub>, 1.6 mM KH<sub>2</sub>PO<sub>4</sub>, 0.9 mM Na<sub>2</sub>EDTA, 11.1 mM glucose). Single-cell suspensions from bone marrow were prepared in balanced salt solution (0.15 M NaCl, 4 mM KCl, 2 mM CaCl<sub>2</sub>, 1 mM MgSO<sub>4</sub>, 1 mM KH<sub>2</sub>PO<sub>4</sub>, 0.8 mM K<sub>2</sub>HPO<sub>4</sub>, and 15 mM N-2-hydroxyethylpiperazine-N'-2-ethanesulfonic acid supplemented with 2% [vol/vol] bovine calf serum). Clonal analysis of bone marrow cells (2.5x10<sup>4</sup>) and splenocytes (5x10<sup>4</sup>) was performed in 1 mL semisolid agar cultures of 0.3% agar in Dulbecco/s modified Eagles medium containing 20% newborn calf serum, stem cell factor (100 ng/mL), erythropoietin (2 U/mL), and interleukin-3 (10 ng/mL), incubated at 37°C for 7

days in a fully humidified atmosphere of 10% CO<sub>2</sub> in air. Cultures were fixed, dried onto glass slides, and stained for acetylcholinesterase, Luxol fast blue, and haematoxylin, and the number and type of colonies were determined. Liquid cultures of CD150<sup>+</sup> progenitor cells for megakaryocyte generation was performed in StemPro-34 serum-free medium with nutrient supplement (Invitrogen) and TPO at 200ng/mL. For megakaryocyte ploidy analyses, bone marrow was collected into 1 mL of CATCH buffer (Hank's balanced salt solution with 3% BSA, 1.3 mM sodium citrate, 1 mM adenosine, 2 mM theophylline, and 3% FCS) and stained with FITC-conjugated anti-CD41 antibody (BD Pharmingen) on ice. Samples were incubated with propidium iodide (50 µg/mL in 3.4 mM sodium citrate) for 1 hour on ice, washed twice in CATCH buffer and aggregates were removed with a 100 µm sieve. Samples were treated with 50 µg/mL RNase H for 30 min at room temperature before analysis on a LSRII flow cytometer (Becton Dickinson). Femurs, sternii and spleens were fixed in 10% vol/vol buffered formalin and embedded in paraffin and 1- to 3-µm sections were stained with haematoxylin and eosin for megakaryocyte enumeration via light microscopy. Fluorescence microscopy was performed on individual megakaryocytes stained with Cyto64 (Invitrogen) and analysed using BD Pathway (Becton Dickinson) and Zeiss Live Cell Observer (C4.38, Ziess) with the GFP channel and phase channel.

### ***Flow Cytometry***

Staining was performed using rat anti-mouse biotinylated or fluorochrome-conjugated antibodies specific for Ter119 (Ly-76), Gr1 (Ly6G and Ly6C), Mac1 (CD11b), B220 (CD45R), CD4, CD8, CD41, CD16/32, Sca1 (Ly6A/E), CD48 (BD Pharmingen), cKit (CD117) and CD150 (Biolegend) and IL-7 receptor  $\alpha$  (IL7R $\alpha$ ), CD48, CD105, and CD9 (eBioscience). Secondary staining used streptavidin eFluor450 (BD Pharmingen). Cells were analyzed using a LSR Fortessa flow cytometer (Becton Dickinson), or cells were sorted using a FACSAria II (Becton Dickinson) flow cytometer after antibody staining with lineage depletion. For analysis of erythroid and platelet reconstitution by sorted progenitors, C57BL/6 mice were exposed to a single dose of 475c Gy of  $\gamma$ -

irradiation, and injected via the tail vein with 1000 progenitor cells sorted from mice expressing the *Aequorea victoria* green fluorescent protein (GFP) protein under the human ubiquitin C promoter, obtained from Jackson Laboratories (Maine, USA) (6). Blood from the tail was analyzed on days 4, 7 and 12 following transplantation.

### ***Western blot analysis***

Protein extracts were prepared from platelets or megakaryocytes in lysis buffer containing 1% (vol/vol) Triton X-100, 50 mM Tris-HCl, pH 7.5, 150 mM NaCl, 1 mM EDTA, freshly supplemented with 2 mM Na<sub>3</sub>VO<sub>4</sub>, 10 mM NaF, 1 mM PMSF, and complete protease inhibitor cocktail (Roche Diagnostics) after purification by centrifugation. Proteins were separated by SDS-PAGE using Novex 4-12% Bis-Tris NuPAGE gels, transferred to PVDF membrane. The PVDF membrane was first blocked with 1% BSA in phosphate-buffered saline containing 0.1% Tween 20, and further blocked with the Avidin-Biotin blocking kit from Invitrogen (Cat. No. 00-4303). The membrane was then probed with a biotinylated rat-anti-mouse Mpl mAb (clone AMM2) at 0.5 µg/mL (Cat. No. 10403, Immuno-Biological Laboratories Co., Ltd.), followed by reaction with 1:10,000 diluted NeutrAvidin-HRP (Cat. No. 31030, Pierce). The ECL reaction was performed with Millipore Luminata Forte and the membrane was exposed to Amersham ECL film (GE Healthcare) to visualise endogenous Mpl. The loading control protein β-actin was detected using a goat-anti-actin-HRP from Santa-Cruz.

### ***Platelet life span***

Blood was obtained by cardiac puncture into 0.1 volume of Aster-Jandl anticoagulant (85 mM sodium citrate, 69 mM citric acid, and 20 mg/ml glucose, pH 4.6). Platelet-rich plasma (PRP) was obtained by centrifugation at 125 g for 8 min, followed by centrifugation of the supernatant buffy coat at 125 g for 8 min. Platelets were washed by centrifugation at 860 g for 5 min in 140 mM NaCl, 5 mM KCl, 12 mM trisodium citrate, 10 mM glucose, and 12.5 mM sucrose, pH 6.0 (buffer

A). The platelet pellets were resuspended in PBS and platelets of the same genotype pooled and labeled with biotin (1 $\mu$ g/ml) 1 h at room temperature. The washed platelet pellets were resuspended in a small volume of PBS and platelet counts determined using Sphero blank calibration particles on a FACSCalibur flow cytometer. Platelet counts were adjusted to 2x10<sup>8</sup> cells/ml and 200  $\mu$ l transfused per recipient C57BL/6 mouse (a total of 4x 10<sup>7</sup> cells). Platelets were identified in PRP as being CD41-PE<sup>+</sup> and the proportion of biotinylated (streptavidin-APC<sup>+</sup>) platelets remaining at each time point was assessed. 100% was set based on the mean value of the 1h and 3 h timepoints post transfusion per individual mouse.

### ***Serum TPO measurement***

Mice were bled by cardiac puncture, the blood transferred into BD microtainer serum separator gel tubes (Cat. No. 365968, Becton Dickinson) and allowed to clot at room temperature, and the serum separated by centrifugation. Commercial antibody-based ELISA test kits were used to detect TPO (Mouse Thrombopoietin Quantikine ELISA Kit, MTP00; R&D Systems).

### ***Reverse transcription PCR***

Liver RNA was prepared using Trizol (Life Technologies) according to the manufacturer's instructions and treated with RNase free DNase RQ1 (Promega) and 5 $\mu$ g was used for first strand cDNA synthesis using SuperScript II (Life Technologies). ~0.5 $\mu$ g of cDNA was then used in a Taqman PCR reaction with Universal PCR mastermix and murine TPO (Mm0043704\_m1) and GAPDH (Mm00802090\_m1) Taqman probes (Life Technologies) on an ABI 7900 Fast Real-Time PCR instrument (Applied Biosystems). TPO expression relative to GAPDH control were determined using SDS version 2.3 programme (Applied Biosystems) and expressed as  $\Delta$ CT values.

### ***Statistical Analysis***

Student's unpaired two-tailed t-tests were used using GraphPad Prism v. 5.0a for Mac Os X (GraphPad Software), unless otherwise specified. Bonferroni correction for multiple testing was used where indicated.

### ***LSK global gene expression analysis and bioinformatics***

Total RNA was purified from 400,000 - 500,000 sorted LSK cells using the RNeasy Micro kit (Qiagen). RNA quality was assessed with the Agilent Bioanalyzer 2100 (Agilent Technologies) by using the Agilent RNA 6000 Nanokit (Agilent Technologies) according to the manufacturer's protocol. Up to 200ng of RNA was labelled with standard Total Prep RNA amplification kit (Ambion), and complementary RNA (1.5 µg) was hybridized to illumina Mouse WG-6 V2.0 Expression BeadChips according to Illumina standard protocols. Microarray data were analyzed by using the limma (Version 3.16.5) package of the Bioconductor open-source software project ([www.bioconductor.org](http://www.bioconductor.org)) in R (Version 3.0.1). Raw intensities were normalized by using the neqc function, which performs normexp background correction followed by quantile normalization by using control probes. Probes were filtered if not detected in any sample (detection p value, 0.05). Pairwise comparison was made by using linear modeling and empirical Bayes moderated t statistics and array quality weights (7). The false discovery rate (FDR) was controlled by using the Benjamini-Hochberg algorithm. Probes with  $FDR < 0.05$  were judged to be differentially expressed. Rotational Gene set testing was performed using ROAST, using a set statistic of mean50 whereby significance occurs if greater than 25% of the set are differentially expressed, using gene sets weighted by log fold change, and  $10^4$  rotations (8). Results are displayed using the barcodeplot function in the limma Bioconductor package in R. Gene expression microarray data of CD34<sup>+</sup> bone marrow cells from human patients with essential thrombocythemia were obtained from the Gene Expression Omnibus (GSE9827, (9)), and analysed using affy (Version 1.34.0), rma normalisation, and limma packages in R as described.

## Supplementary Figure and Table Legends

### ***Supplementary Fig. 1. Activity of cre recombinase in PF4-cre mice.***

(A) *PF4-cre* activity indicated by EYFP expression in CD150<sup>hi</sup>CD9<sup>hi</sup> bone marrow megakaryocytes and CD41<sup>+</sup> peripheral blood platelets in *Rosa26EYFP<sup>PF4cre</sup>* (red) mice compared to *Rosa26EYFP<sup>fl</sup>* negative controls (blue), but not in peripheral blood Ter119<sup>+</sup> erythrocytes, or bone marrow Gr1/Mac1<sup>+</sup> myeloid cells, B220<sup>+</sup> lymphocytes, CD4<sup>+</sup> or CD8<sup>+</sup> T-lymphocytes.

(B) Representative flow cytometry profiles of LSK (brown) PreGM (grey), GMP (green), BEMP (purple), CD150<sup>+</sup>CD9<sup>hi</sup> (black) CD150<sup>+</sup>FcγR<sup>+</sup> (red), PreCFU-E (yellow) and CFU-E (orange) cell populations analysed.

(C) Representative plot of EYFP expression (upper panel) in the CD150<sup>+</sup>FcγR<sup>+</sup> progenitor cells in *Rosa26EYFP<sup>PF4cre</sup>* and control *Rosa26EYFP<sup>fl</sup>* mice. Barplot (lower panel) of mean fluorescent intensity (MFI) in arbitrary units of EYFP in defined *Rosa26EYFP<sup>PF4cre</sup>* cell populations relative to *Rosa26EYFP<sup>fl</sup>* controls with standard deviations shown. \* =  $P < 0.02$ .

### ***Supplementary Fig. 2. Characterisation of CD150<sup>+</sup>FcγR<sup>+</sup> progenitor cells.***

(A) Representative flow cytometry plot of Lin<sup>-</sup>Sca-1<sup>-</sup>Kit<sup>+</sup> cells defining the CD150<sup>+</sup>FcγR<sup>+</sup> bone marrow population from a *Mpl<sup>+/+</sup>* mouse. Viable cells per femur shown with standard deviation from n=4 mice at 8-10 weeks of age.

(B) Colony assay of 400 sorted GMP granulomonocytic progenitor and CD150<sup>+</sup>FcγR<sup>+</sup> cells cultured for 7 days in a cytokine cocktail of SCF (100 ng/mL), IL3 (10 ng/mL) and erythropoietin (EPO, 2 U/mL). Blast; blast colony, G; granulocyte, GM; granulocyte-macrophage, M; macrophage, Eo; eosinophil, Meg; megakaryocyte, MegE; megakaryocyte-erythroid, MegI; megakaryocyte-immature, E; erythroid colonies. \* =  $P_{adj} < 0.05$  correction for multiple testing.

(C) Erythrocyte and platelet production from 1000 transplanted CD150<sup>+</sup>FcγR<sup>+</sup> or GMP cells marked with green-fluorescent protein (6) following injection into sublethally irradiated recipient

mice. Platelets and red blood cells were measured at 4, 7, and 12 days following transplantation and cell numbers expressed as the proportion of GFP<sup>+</sup> cells of the total number of platelets or red blood cells shown as a percentage, with 2-3 independent donors and 4 recipients per donor. Mean and standard deviation shown.

**Supplementary Fig. 3. *Mpl* expression in *Mpl*<sup>PF4cre/PF4cre</sup> mice.**

(A) Expression of the *Mpl-GFP* reporter in *Mpl*<sup>fl/fl</sup> and *Mpl*<sup>PF4cre/PF4cre</sup> megakaryocytes by flow cytometry (upper panel) and live cell imaging (lower panels). Megakaryocytes were generated from Kit<sup>+</sup>Sca-1<sup>-</sup>CD150<sup>+</sup> progenitors cultured in TPO for 4 days. For imaging, individual megakaryocytes were analysed using BD Pathway (Becton Dickinson) and Zeiss Live Cell Observer (C4.38) with GFP channel and phase channel.

(B) Expression of the *Mpl-GFP* reporter in platelets (CD41<sup>+</sup>) and erythrocytes (Ter119<sup>+</sup>) from blood, and in B220<sup>+</sup> B-lymphoid, CD4<sup>+</sup> or CD8<sup>+</sup> T-lymphoid and Gr1/Mac1<sup>+</sup> myeloid cells in the bone marrow of *Mpl*<sup>fl/fl</sup> (red) and *Mpl*<sup>PF4cre/PF4cre</sup> mice (green). *Mpl*<sup>Delcre/Delcre</sup> mice (blue) were included as a negative control.

(C) Representative flow cytometric gating strategy and expression of Mpl in hematopoietic cell populations from *Mpl*<sup>fl/fl</sup> (top panels) and *Mpl*<sup>PF4cre/PF4cre</sup> (bottom panels) mice by flow cytometry using anti-Mpl antibody (red, with isotype control staining in blue).

(D) Representative flow cytometric gating strategy and expression of the *Mpl-GFP* reporter in LSK and progenitor populations in *Mpl*<sup>fl/fl</sup> (red), *Mpl*<sup>PF4cre/PF4cre</sup> (green) and control *Mpl*<sup>Delcre/Delcre</sup> mice (blue).

**Supplementary Fig. 4. Megakaryocytosis, platelet survival curves and platelet half-life in *Mpl*<sup>PF4cre/PF4cre</sup>**

(A) Histological sections of bone marrow from *Mpl*<sup>+/+</sup>, *Mpl*<sup>fl/fl</sup>, *Mpl*<sup>Delcre/Delcre</sup> and *Mpl*<sup>PF4cre/PF4cre</sup> mice. Haematoxylin and eosin staining of representative sections at 200x magnification. Images were acquired with a Zeiss Axioplan-2 microscope 20x/0.30 DIC L objective with AxioCam HrC and AxioVision Version 3.1 image-acquisition software.

(B) Platelets were purified from male *Mpl*<sup>PF4cre/PF4cre</sup> and *Mpl*<sup>fl/fl</sup> control mice, labelled with NHS-biotin and transfused into wild type C57Bl/6 male mice. Platelets were identified as being CD41<sup>+ve</sup> and the proportion of biotinylated (streptavidin<sup>+ve</sup>) platelets remaining at each time point was assessed. n=17 mice received *Mpl*<sup>PF4cre/PF4cre</sup> platelets and n=9 *Mpl*<sup>fl/fl</sup> control platelets. Data is combined from 2 separate experiments and represent mean ± standard deviation.

**Supplementary Fig. 5. Enumeration of progenitor cells in *Mpl*<sup>PF4cre/PF4cre</sup> mice.**

Representative flow cytometry profiles and gating strategies for analysis of cell populations from bone marrow of *Mpl*<sup>+/+</sup>, *Mpl*<sup>fl/fl</sup>, *Mpl*<sup>Delcre/Delcre</sup>, *Mpl*<sup>PF4cre/PF4cre</sup> and *TPO*<sup>Tg</sup> mice. The mean number of each population is shown as viable cells per femur ± standard deviation (*Mpl*<sup>+/+</sup> n= 4, *Mpl*<sup>fl/fl</sup> n=8, *Mpl*<sup>Delcre/Delcre</sup> n=3, *Mpl*<sup>PF4cre/PF4cre</sup> n=6, and *TPO*<sup>Tg</sup> n=5). \* =  $P_{adj} < 0.05$  compared to *Mpl*<sup>fl/fl</sup> and \*\* =  $P_{adj} < 0.05$  compared to *Mpl*<sup>+/+</sup> with correction for multiple testing.

**Supplementary Fig. 6. Recloning potential of *Mpl*<sup>PF4cre/PF4cre</sup> blast colony-forming pre-progenitor cells**

Primary cultures were prepared using 25,000 bone marrow cells from *Mpl*<sup>fl/fl</sup>, *Mpl*<sup>PF4cre/PF4cre</sup> and *TPO*<sup>Tg</sup> mice stimulated with 100ng/mL stem cell factor (SCF) and 100 ng/mL IL-6. Individual primary blast colonies were picked, and replated for 7 days in secondary cultures stimulated by 100 ng/mL SCF, 10 ng/mL IL-3 and 2 U/mL erythropoietin and the type and number of colonies scored after 7 days. The number of colonies of secondary blast, megakaryocyte, granulocyte, granulo-



macrophage, macrophage and eosinophil colonies that developed is shown for 20 ( $Mpl^{fl/fl}$ ,  $Mpl^{PF4cre/PF4cre}$ ) and 40 ( $TPO^{Tg}$ ) independent recloned blast colonies, with the mean number of colonies for each colony type across all three genotypes shown (dotted line). \* =  $P < 0.009$  by Chi-Squared test for proportions using the proportion of colonies greater than the overall mean colony number when comparing  $Mpl^{PF4cre/PF4cre}$  and  $TPO^{Tg}$  primary blast colonies to expected proportions from  $Mpl^{fl/fl}$  primary blast colonies.

***Supplementary Fig. 7. Gene expression changes in CD34<sup>+</sup> cells of patients with essential thrombocythemia***

Barcode plot.  $TPO^{Tg}$  "TPO stimulated" and  $Mpl^{-/-}$  "TPO starved" signature genes (Table S3, S4) can distinguish between CD34<sup>+</sup> bone marrow cells of patients with essential thrombocythemia from controls ((9) GEO database GSE9827,  $P = 8 \times 10^{-4}$ ).  $P$  value derived from rotational gene set testing using ROAST with the  $TPO^{Tg}$  "TPO stimulated" LSK signature and  $Mpl^{-/-}$  "TPO starved" signature weighted by positive and negative log fold-change respectively (see *SI Material and Methods*). Red bars designate upregulated genes in the  $TPO^{Tg}$  "TPO stimulated" LSK signature set; blue bars designate  $Mpl^{fl/fl -/-}$  "TPO starved" LSK signature set.

**Supplementary Table 1.** Immunophenotypic definitions of bone marrow stem and progenitor cell populations.

**Supplementary Table 2.** Differentially expressed genes in  $Mpl^{PF4cre/PF4cre}$  LSKs compared to  $Mpl^{fl/fl}$  LSKs.

**Supplementary Table 3.** Gene signatures of upregulated genes in  $TPO^{Tg}$  LSKs compared to  $Mpl^{+/+}$  LSKs.

**Supplementary Table 4.** Gene signatures of upregulated genes in  $Mpl^{-/-}$  LSKs compared to  $Mpl^{+/+}$  LSKs.

## References

1. de Graaf CA, *et al.* (2010) Regulation of hematopoietic stem cells by their mature progeny. *Proceedings of the National Academy of Sciences of the United States of America* 107(50):21689-21694.
2. Alexander WS, Roberts AW, Nicola NA, Li R, & Metcalf D (1996) Deficiencies in progenitor cells of multiple hematopoietic lineages and defective megakaryocytopoiesis in mice lacking the thrombopoietic receptor c-Mpl. *Blood* 87(6):2162-2170.
3. Farley FW, Soriano P, Steffen LS, & Dymecki SM (2000) Widespread recombinase expression using FLPeR (flipper) mice. *Genesis* 28(3-4):106-110.
4. Schwenk F, Baron U, & Rajewsky K (1995) A cre-transgenic mouse strain for the ubiquitous deletion of loxP-flanked gene segments including deletion in germ cells. *Nucleic acids research* 23(24):5080-5081.
5. Tiedt R, Schomber T, Hao-Shen H, & Skoda RC (2007) Pf4-Cre transgenic mice allow the generation of lineage-restricted gene knockouts for studying megakaryocyte and platelet function in vivo. *Blood* 109(4):1503-1506.
6. Schaefer BC, Schaefer ML, Kappler JW, Marrack P, & Kedl RM (2001) Observation of antigen-dependent CD8+ T-cell/ dendritic cell interactions in vivo. *Cellular immunology* 214(2):110-122.
7. Ritchie ME, *et al.* (2006) Empirical array quality weights in the analysis of microarray data. *BMC bioinformatics* 7:261.
8. Wu D, *et al.* (2010) ROAST: rotation gene set tests for complex microarray experiments. *Bioinformatics* 26(17):2176-2182.
9. Catani L, *et al.* (2009) Molecular profile of CD34+ stem/progenitor cells according to JAK2V617F mutation status in essential thrombocythemia. *Leukemia* 23(5):997-1000.

Supplementary Figure 1

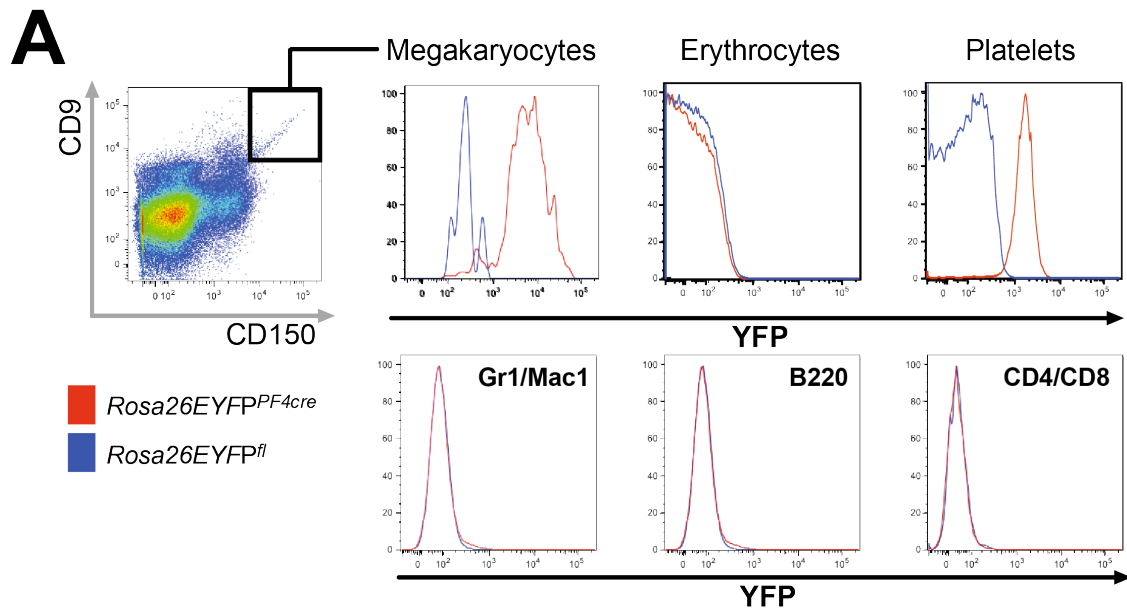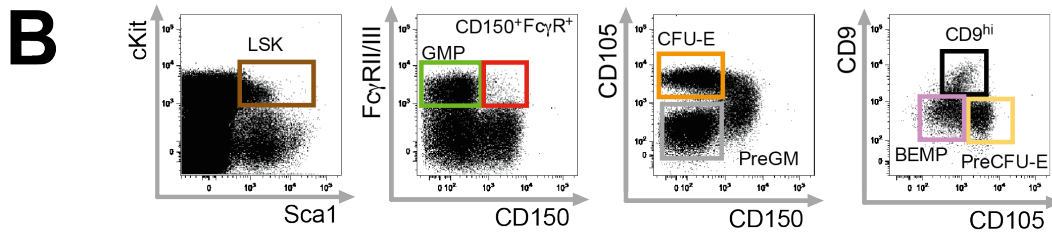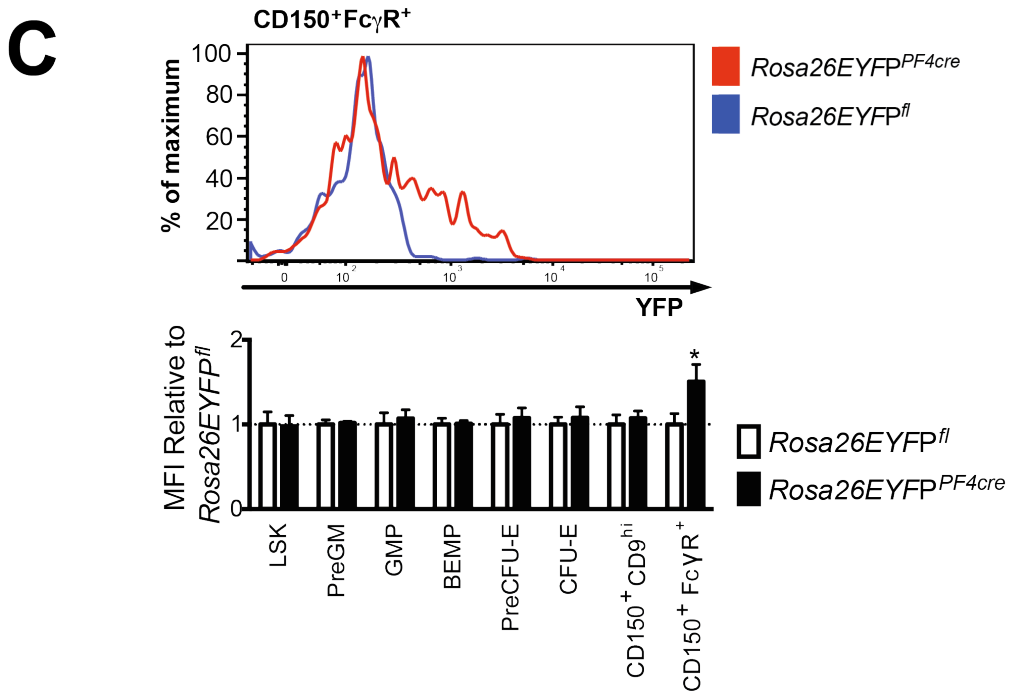

Supplementary Figure 2

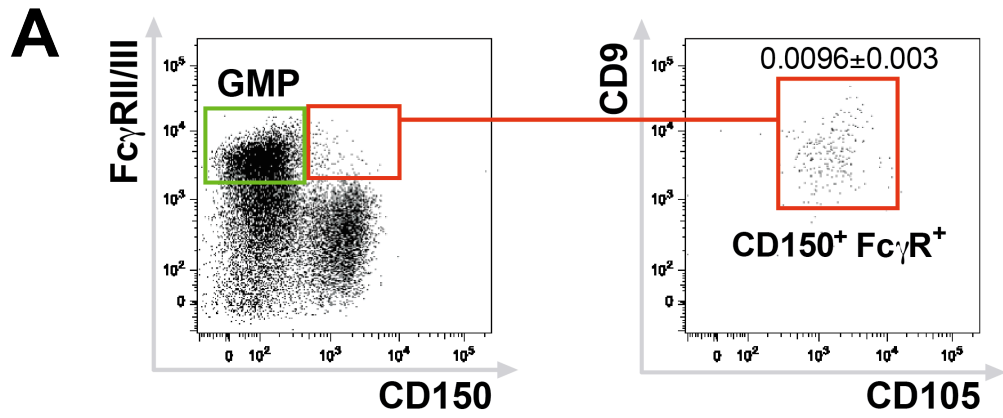

**B**

|                         | Blast            | G                  | GM              | M                 | Eo              | Meg                | Meg/E            | Meg/l           | E                |
|-------------------------|------------------|--------------------|-----------------|-------------------|-----------------|--------------------|------------------|-----------------|------------------|
| <b>GMP</b>              | 0.0<br>±<br>0.0  | 58.3<br>±<br>15.0* | 6.7<br>±<br>4.2 | 10.0<br>±<br>3.5* | 1.7<br>±<br>1.2 | 0.0<br>±<br>0.0    | 0.0<br>±<br>0.0  | 0.0<br>±<br>0.0 | 0.0<br>±<br>0.0  |
| <b>CD150+<br/>FcγR+</b> | 3.0<br>±<br>0.0* | 5.0<br>±<br>1.0    | 7.3<br>±<br>7.5 | 1.3<br>±<br>0.6   | 0.0<br>±<br>0.0 | 57.0<br>±<br>15.5* | 9.0<br>±<br>1.0* | 4.0<br>±<br>4.0 | 7.3<br>±<br>2.5* |

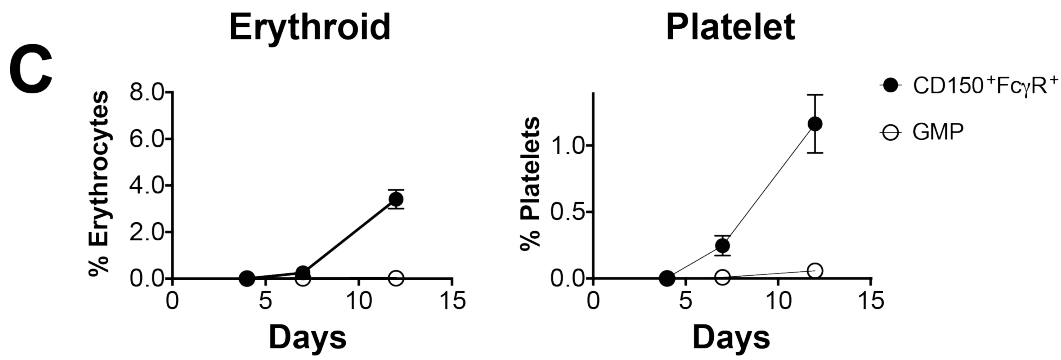

Supplementary Figure 3

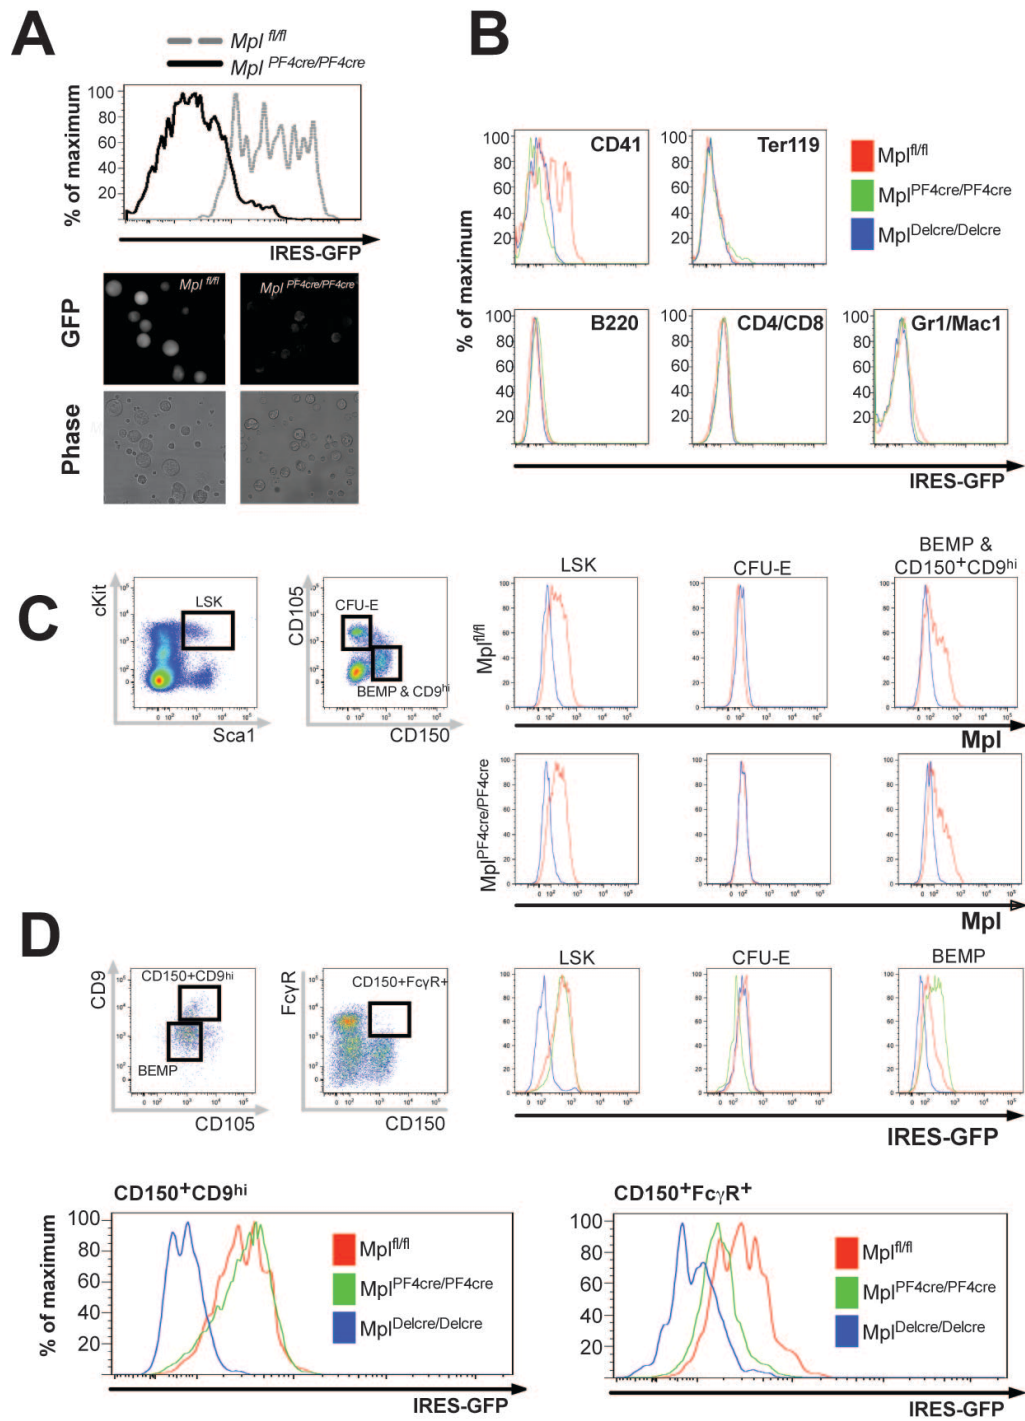

Supplementary Figure 4

**A**

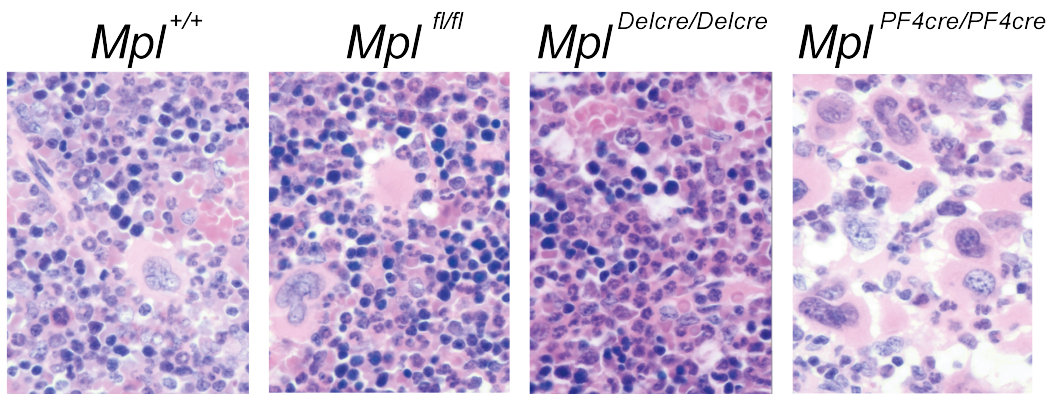

**B**

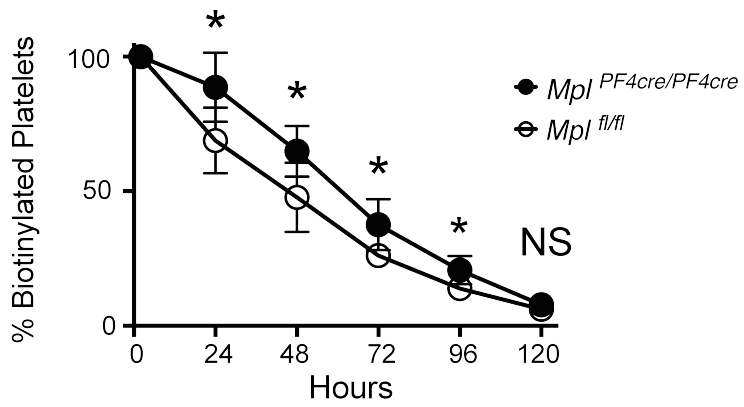

Supplementary Figure 5

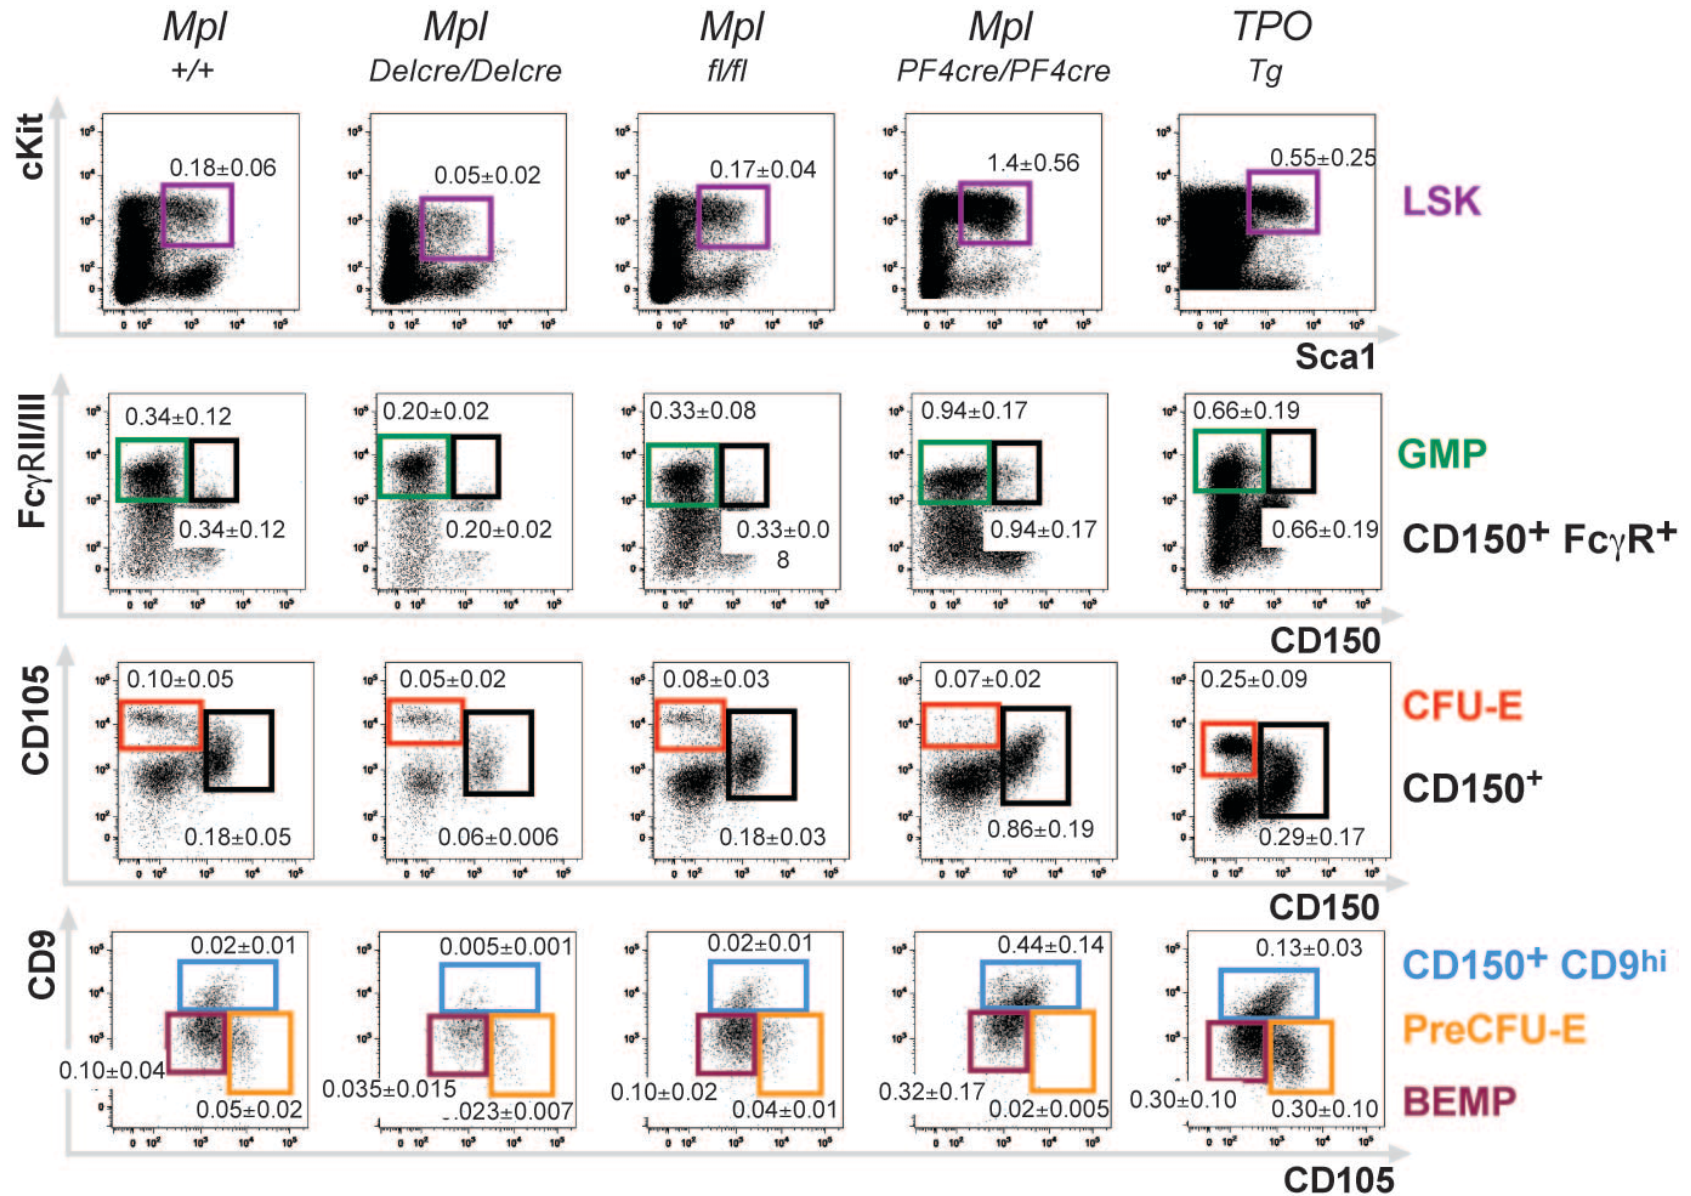

Supplementary Figure 6

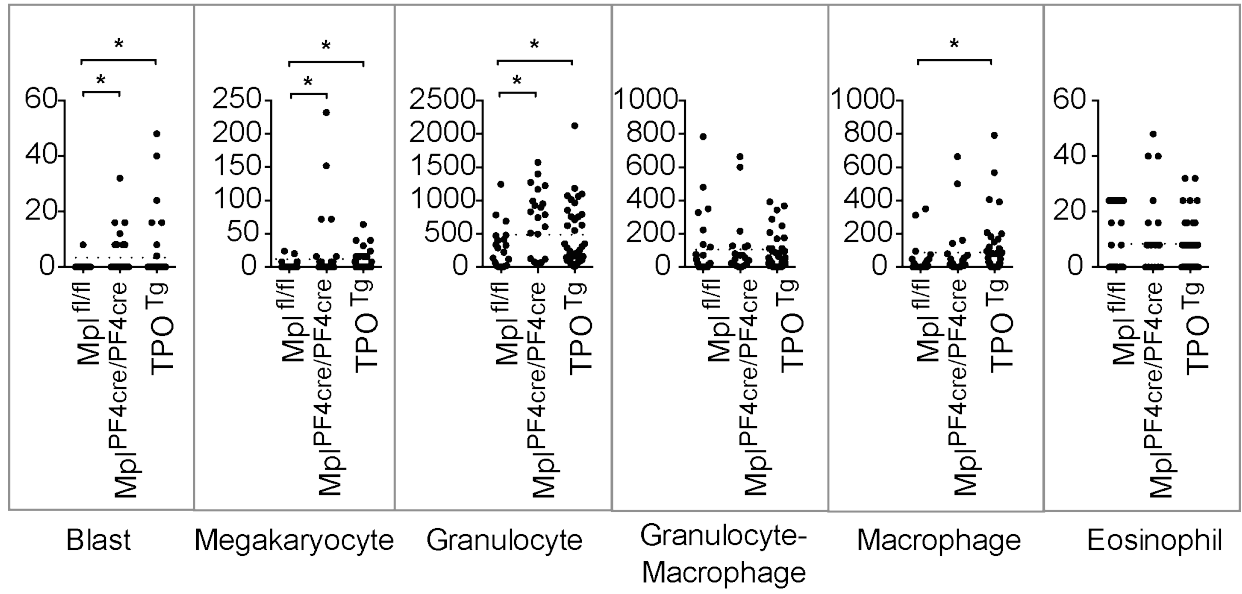



Supplementary Figure 7

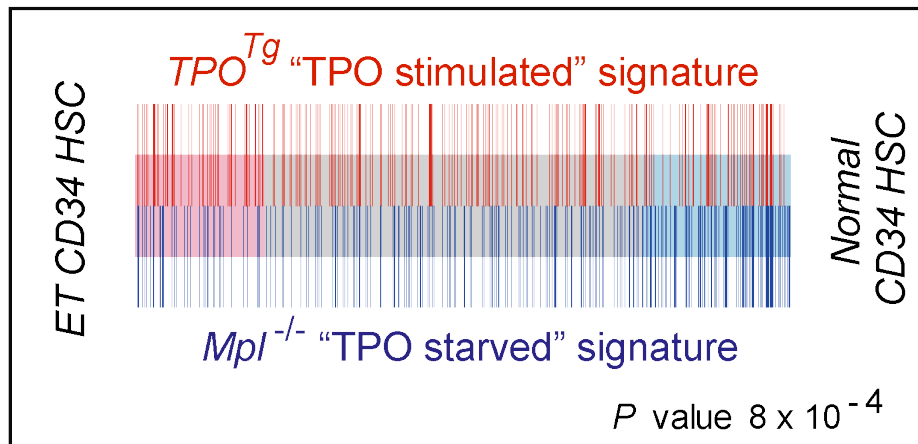

**Supplementary Table 1. Immunophenotypic definitions of bone marrow stem and progenitor cell populations**

| <b>Bone Marrow Subset</b>                                                                          | <b>Immunophenotype</b>                                                                                                                                           |
|----------------------------------------------------------------------------------------------------|------------------------------------------------------------------------------------------------------------------------------------------------------------------|
| LSK                                                                                                | Lineage <sup>-</sup> Sca-1 <sup>+</sup> Kit <sup>+</sup>                                                                                                         |
| PreGM, pre-granulocyte macrophage                                                                  | Lineage <sup>-</sup> IL7Rα <sup>-</sup> cKit <sup>+</sup> Sca1 <sup>-</sup> CD150 <sup>-</sup> Endoglin <sup>-</sup> FcγRII/III <sup>-</sup>                     |
| GMP, granulocyte-macrophage                                                                        | Lineage <sup>-</sup> IL7Rα <sup>-</sup> cKit <sup>+</sup> Sca1 <sup>-</sup> CD150 <sup>-</sup> Endoglin <sup>-</sup> FcγRII/III <sup>+</sup>                     |
| BEMP, bipotential erythroid megakaryocyte                                                          | Lineage <sup>-</sup> IL7Rα <sup>-</sup> cKit <sup>+</sup> Sca1 <sup>-</sup> CD150 <sup>+</sup> FcγRII/III <sup>lo</sup> Endoglin <sup>lo</sup> CD9 <sup>lo</sup> |
| CD150 <sup>+</sup> CD9 <sup>hi</sup> , CD9 <sup>hi</sup> bipotential erythroid megakaryocyte       | Lineage <sup>-</sup> IL7Rα <sup>-</sup> cKit <sup>+</sup> Sca1 <sup>-</sup> CD150 <sup>+</sup> FcγRII/III <sup>lo</sup> Endoglin <sup>lo</sup> CD9 <sup>hi</sup> |
| CD150 <sup>+</sup> FcγR <sup>+</sup> , FcγRII/III <sup>+</sup> bipotential erythroid megakaryocyte | Lineage <sup>-</sup> IL7Rα <sup>-</sup> cKit <sup>+</sup> Sca1 <sup>-</sup> CD150 <sup>+</sup> FcγRII/III <sup>+</sup> Endoglin <sup>lo</sup> CD9 <sup>hi</sup>  |
| PreCFU-E, pre-colony forming unit erythroid                                                        | Lineage <sup>-</sup> IL7Rα <sup>-</sup> cKit <sup>+</sup> Sca1 <sup>-</sup> CD150 <sup>+</sup> FcγRII/III <sup>-</sup> Endoglin <sup>hi</sup> CD9 <sup>lo</sup>  |
| CFU-E, colony forming unit erythroid                                                               | Lineage <sup>-</sup> IL7Rα <sup>-</sup> cKit <sup>+</sup> Sca1 <sup>-</sup> CD150 <sup>-</sup> FcγRII/III <sup>-</sup> Endoglin <sup>hi</sup>                    |

**Supplementary Table 2:** Gene expression changes in MplPF4cre/PF4cre LSKs versus Mplfl/fl LSKs. This table shows log2 fold changes for genes that are significantly differentially expressed between MplPF4cre/PF4cre LSKs versus Mplfl/fl LSKs. These data were generated from samples which were obtained using the Illumina gene expression platform described in SI Materials and Methods.

| ID           | GeneRef        | Symbol        | Log Fold Change |
|--------------|----------------|---------------|-----------------|
| ILMN_2893879 | NM_024228.2    | GDPD3         | 4.417589681     |
| ILMN_2806439 | NM_182959.2    | SLC17A8       | 4.106250725     |
| ILMN_2628178 | NM_007706.3    | SOCS2         | 3.793305954     |
| ILMN_2604494 | NM_013723.2    | PODXL         | 3.143256824     |
| ILMN_1249975 | XM_001001076.2 | IGHG          | 3.047952954     |
| ILMN_1232989 | NM_020578.2    | EHD3          | 2.95407174      |
| ILMN_2742042 | NM_019738.1    | NUPR1         | 2.838747695     |
| ILMN_3160292 | NM_001013785.2 | AKR1C19       | 2.787071019     |
| ILMN_2519673 | NM_011708.3    | VWF           | 2.763435158     |
| ILMN_2931334 | NM_021283.1    | IL4           | 2.746914709     |
| ILMN_2731908 | XM_358637.1    | 6330405H19    | 2.66024107      |
| ILMN_2947526 | NM_007899.1    | ECM1          | 2.555062578     |
| ILMN_2772264 |                | IGH-VJ558     | 2.553948885     |
| ILMN_2735184 | NM_009929.2    | COL18A1       | 2.503182448     |
| ILMN_2663403 | XM_001481237.1 | LOC100043918  | 2.417915348     |
| ILMN_2741096 | NM_011595.2    | TIMP3         | 2.367492865     |
| ILMN_2653205 | NM_001001999.1 | GP1BB         | 2.352553829     |
| ILMN_2727153 | XM_001475611.1 | LOC100046120  | 2.329131739     |
| ILMN_2672190 | NM_010495.2    | ID1           | 2.265837667     |
| ILMN_2690938 | NM_145920.2    | EVC2          | 2.258734949     |
| ILMN_2744603 | NM_177157.4    | GCHFR         | 2.255678813     |
| ILMN_1218890 | XM_355056.1    | LOC381140     | 2.219746019     |
| ILMN_2913222 | NM_001025103.1 | EFCAB4A       | 2.17775702      |
| ILMN_1222734 | NM_013467.3    | ALDH1A1       | 2.162368179     |
| ILMN_1249378 | NM_011498.4    | BHLHB2        | 2.1444236       |
| ILMN_2729252 | XR_002313.1    | 5830431A10RIK | 2.130733702     |
| ILMN_2624854 | NM_008183.3    | GSTM2         | 2.111379146     |
| ILMN_2621012 | NM_028030.3    | RBPM52        | 2.10830024      |
| ILMN_2761205 | NM_030704.1    | HSPB8         | 2.081339257     |
| ILMN_1250340 |                | A630055A13RIK | 2.059023543     |
| ILMN_3151149 | NM_001033851.1 | CPNE8         | 2.037449165     |
| ILMN_2687547 | NM_138741.1    | SDPR          | 2.034676275     |
| ILMN_1231030 | NM_009328.2    | TCF15         | 2.006680258     |
| ILMN_2805372 | NM_021359.2    | ITGB6         | 2.000245472     |
| ILMN_2879588 | NM_175386.3    | LHFP          | 1.99695033      |
| ILMN_2718330 | NM_009895.3    | CISH          | 1.99670333      |
| ILMN_2720663 | NM_001025103.1 | EFCAB4A       | 1.995450598     |
| ILMN_1232263 | NM_021542.4    | KCNK5         | 1.990534222     |
| ILMN_2908435 | NM_023785.1    | PPBP          | 1.989919717     |
| ILMN_2602938 | NM_133888.2    | SMPDL3B       | 1.975564277     |

|              |                |               |             |
|--------------|----------------|---------------|-------------|
| ILMN_2504823 | NM_172570.4    | TRIM47        | 1.967811106 |
| ILMN_2815138 | NM_010867.1    | MYOM1         | 1.963073371 |
| ILMN_2638114 | NM_008973.2    | PTN           | 1.943555042 |
| ILMN_2696040 | NM_013582.2    | LHCGR         | 1.903849718 |
| ILMN_2888940 | NM_026983.1    | 1810033M07RIK | 1.893173391 |
| ILMN_2846194 | NM_026728.1    | ECHDC2        | 1.870844816 |
| ILMN_1251449 | NM_008183.2    | GSTM2         | 1.858072868 |
| ILMN_2635272 | XM_001472091.1 | IGH-VJ558     | 1.845753524 |
| ILMN_2731901 | NM_011311.1    | S100A4        | 1.828502459 |
| ILMN_2757966 | NM_019932.2    | CXCL4         | 1.813989839 |
| ILMN_2653567 | NM_023275.2    | RHOJ          | 1.803535084 |
| ILMN_2623393 | NM_009692.2    | APOA1         | 1.800137624 |
| ILMN_1228783 | XR_031250.1    | LOC100043986  | 1.798585737 |
| ILMN_2653207 | NM_011565.2    | TEAD2         | 1.787800454 |
| ILMN_1214322 |                | C630030D09RIK | 1.780179325 |
| ILMN_2867696 | NM_183016.1    | CDC42BPB      | 1.770171397 |
| ILMN_2777019 | NM_012046.2    | SPO11         | 1.763863473 |
| ILMN_2757634 | NM_027828.2    | FAM110C       | 1.759506888 |
| ILMN_2778279 | NM_008036.2    | FOSB          | 1.758311127 |
| ILMN_2498471 | NM_008986.2    | PTRF          | 1.755941674 |
| ILMN_2706562 | NM_021292.1    | EVC           | 1.745935181 |
| ILMN_1227494 |                | EGR3          | 1.740650565 |
| ILMN_2619983 | NM_008304.2    | SDC2          | 1.736964253 |
| ILMN_1241903 | NM_010637.2    | KLF4          | 1.736904789 |
| ILMN_1225422 | XM_001471648.1 | LOC100048807  | 1.734804788 |
| ILMN_2488846 | NM_016712.2    | TMOD4         | 1.727336362 |
| ILMN_1230696 | XM_148393.1    | IGL-V1        | 1.727238584 |
| ILMN_2692615 | NM_009373.3    | TGM2          | 1.723842573 |
| ILMN_2836386 | NM_011888.2    | CCL19         | 1.722311092 |
| ILMN_2721571 | NM_013730.4    | SLAMF1        | 1.718408948 |
| ILMN_1247691 | NM_008235.2    | HES1          | 1.700746132 |
| ILMN_1228102 | NM_023785.2    | PPBP          | 1.695105142 |
| ILMN_2670775 | XM_916109.2    | C530008M17RIK | 1.694062061 |
| ILMN_3153940 | NM_178680.3    | UNC45B        | 1.689348295 |
| ILMN_2911123 | NM_010575.1    | ITGA2B        | 1.683124664 |
| ILMN_2790357 | NM_011352.2    | SEMA7A        | 1.675800336 |
| ILMN_2522127 |                | MYO1E         | 1.674434829 |
| ILMN_2706819 | NM_026878.1    | RASL11B       | 1.671072321 |
| ILMN_1224607 |                | D930046M13RIK | 1.636389608 |
| ILMN_3160137 | NM_009657.3    | ALDOC         | 1.635258187 |
| ILMN_1221016 | NM_009662.2    | ALOX5         | 1.633119359 |
| ILMN_1230143 | NM_028967.1    | BATF2         | 1.630666912 |
| ILMN_2510474 | NM_001002272.2 | TRO           | 1.620885289 |
| ILMN_1219074 | NM_011408.1    | SLFN2         | 1.615781901 |
| ILMN_2680054 | NM_053078.3    | D0H4S114      | 1.615525487 |
| ILMN_2623983 | NM_010118.1    | EGR2          | 1.606425853 |

|              |                |               |             |
|--------------|----------------|---------------|-------------|
| ILMN_1253182 | NM_010474.1    | HS3ST1        | 1.60338397  |
| ILMN_2721385 | NM_134448.2    | DST           | 1.595748154 |
| ILMN_2689998 | NM_010218.2    | FJX1          | 1.579539486 |
| ILMN_2667805 | NM_021515.2    | AK1           | 1.573365756 |
| ILMN_2822579 | NM_009932.2    | COL4A2        | 1.567607223 |
| ILMN_1253504 | NM_010284.2    | GHR           | 1.567099515 |
| ILMN_3159826 | NM_001042607.1 | RYK           | 1.559381318 |
| ILMN_1224866 | NM_008969.3    | PTGS1         | 1.557278536 |
| ILMN_1256907 | NM_008783.1    | PBX1          | 1.556932189 |
| ILMN_1213278 | NM_146145.2    | JAK1          | 1.555683354 |
| ILMN_2625855 | NM_027127.2    | GPX8          | 1.554149762 |
| ILMN_1219471 | NM_139300.3    | MYLK          | 1.552201911 |
| ILMN_1236595 | NM_029983.4    | SLA2          | 1.54829243  |
| ILMN_1215372 | NM_021423.1    | SHANK3        | 1.547544669 |
| ILMN_2619408 | NM_007498.2    | ATF3          | 1.546484862 |
| ILMN_1232402 | NM_177546.2    | PCYT1B        | 1.545494958 |
| ILMN_2805375 | NM_021359.2    | ITGB6         | 1.532641512 |
| ILMN_2753687 | NM_172525.2    | ARHGAP29      | 1.532322323 |
| ILMN_2745370 | NM_133670.1    | SULT1A1       | 1.529865552 |
| ILMN_2789900 | NM_026862.3    | CD177         | 1.527127352 |
| ILMN_2633062 |                | 9130422G05RIK | 1.526414028 |
| ILMN_1228983 |                | E330039I02RIK | 1.521737664 |
| ILMN_2789862 | NM_177897.3    | B4GALNT4      | 1.515621296 |
| ILMN_1237375 | NM_009127.3    | SCD1          | 1.515584992 |
| ILMN_1219298 | NM_026639.2    | ART4          | 1.514911973 |
| ILMN_2999439 | NM_010637.1    | KLF4          | 1.497186613 |
| ILMN_2982781 | NM_021542.2    | KCNK5         | 1.496250584 |
| ILMN_1242977 | NM_008268.1    | HOXB5         | 1.493062079 |
| ILMN_2513781 |                | A130038J17RIK | 1.486820317 |
| ILMN_2733915 | NM_011866.2    | PDE10A        | 1.481154638 |
| ILMN_1251451 | XM_132608.2    | LOC232060     | 1.477872281 |
| ILMN_2519313 | NM_016712.2    | TMOD4         | 1.477442075 |
| ILMN_1212907 | NM_175514.2    | FAM171B       | 1.476837731 |
| ILMN_1230281 | NM_052976.3    | OPHN1         | 1.474106456 |
| ILMN_2959291 | NM_009477.1    | UPP1          | 1.47249374  |
| ILMN_2834764 | NM_175271.2    | GPR23         | 1.463064627 |
| ILMN_1228038 | XM_001474240.1 | LOC100045419  | 1.458570173 |
| ILMN_2793062 | NM_026878.1    | RASL11B       | 1.450758162 |
| ILMN_2745775 | XM_135590.2    | LOC213684     | 1.443440271 |
| ILMN_1244460 | NM_010107.3    | EFNA1         | 1.434339426 |
| ILMN_2598083 | NM_134032.1    | HOXB2         | 1.432275971 |
| ILMN_2754985 | NM_009344.1    | PHLDA1        | 1.43134284  |
| ILMN_1228748 | NM_008260.2    | FOXA3         | 1.431243163 |
| ILMN_1222500 | XM_001477552.1 | LOC100047162  | 1.431092644 |
| ILMN_2609868 | XM_110660.4    | AI427122      | 1.429543774 |
| ILMN_1236465 | NM_010170.4    | F2RL2         | 1.428894373 |

|              |                |                 |             |
|--------------|----------------|-----------------|-------------|
| ILMN_2425029 | NM_009434.2    | PHLDA2          | 1.427134479 |
| ILMN_2657828 | NM_010117.1    | RHBDF1          | 1.426846824 |
| ILMN_2756632 | NM_144805.1    | TMEM40          | 1.422929821 |
| ILMN_1255967 |                | B430216N15RIK   | 1.420686647 |
| ILMN_2706587 | NM_009386.1    | TJP1            | 1.419452006 |
| ILMN_2712120 | NM_011313.2    | S100A6          | 1.411611708 |
| ILMN_2722893 | XM_912852.2    | LOC637227       | 1.41158871  |
| ILMN_2635895 | NM_008880.2    | PLSCR2          | 1.409752024 |
| ILMN_2813487 | NM_011065.2    | PER1            | 1.40839052  |
| ILMN_2645275 | NM_138656.1    | MVD             | 1.40628041  |
| ILMN_1216374 | NM_021715.1    | CHST7           | 1.40513511  |
| ILMN_1221153 |                | DSG2            | 1.404904238 |
| ILMN_2467007 |                | 2810484G07RIK   | 1.403570887 |
| ILMN_2618714 | NM_011057.2    | PDGFB           | 1.402739399 |
| ILMN_1239076 | XM_985182.1    | EG666648        | 1.40075441  |
| ILMN_2625854 | NM_027127.1    | 2310016C16RIK   | 1.400675356 |
| ILMN_2645321 | NM_009236.2    | SOX18           | 1.399681659 |
| ILMN_2467151 |                | CYP11A1         | 1.398126143 |
| ILMN_2621643 | NM_009931.1    | COL4A1          | 1.39442559  |
| ILMN_2862470 | NM_008183.2    | GSTM2           | 1.389575318 |
| ILMN_2732623 | NM_010575.1    | ITGA2B          | 1.385312368 |
| ILMN_1232261 | NM_018761.2    | CTNNAL1         | 1.37598513  |
| ILMN_2813484 | NM_011065.2    | PER1            | 1.374893745 |
| ILMN_2591425 | NM_021896.4    | GUCY1A3         | 1.374559383 |
| ILMN_2956942 | NM_028444.1    | PRKCDBP         | 1.3680135   |
| ILMN_2985836 | NM_146174.1    | FAM115C         | 1.367936815 |
| ILMN_2492170 | NM_001034097.1 | TNFSF12-TNFSF13 | 1.365164724 |
| ILMN_2474239 |                | SLA2            | 1.359563782 |
| ILMN_2776969 | NM_023898.4    | PDE6H           | 1.358589715 |
| ILMN_2680533 | NM_008185.2    | GSTT1           | 1.355774612 |
| ILMN_2740852 | NM_010169.3    | F2R             | 1.354279918 |
| ILMN_2663083 | NM_010190.1    | FCNB            | 1.352889539 |
| ILMN_1215252 | NM_007554.2    | BMP4            | 1.349297163 |
| ILMN_1227577 | NM_001081155.1 | RAP1GAP         | 1.349254982 |
| ILMN_1248099 | NM_028266.4    | COL16A1         | 1.349166367 |
| ILMN_3112219 | NM_001039543.1 | MLF1            | 1.342101332 |
| ILMN_2694170 | NM_011925.1    | CD97            | 1.34182618  |
| ILMN_1253579 |                | BC038881        | 1.341031521 |
| ILMN_1229343 | NM_001083341.1 | MBOAT2          | 1.337095117 |
| ILMN_2733314 | NM_029879.2    | RGS7BP          | 1.336838157 |
| ILMN_2623591 | NM_009685.2    | APBB1           | 1.335728721 |
| ILMN_1218525 | NM_008365.1    | IL18R1          | 1.33195971  |
| ILMN_2607112 | NM_009662.2    | ALOX5           | 1.323711699 |
| ILMN_1230479 | NM_010144.2    | EPHB4           | 1.323510571 |
| ILMN_2624630 | NM_010190.1    | FCNB            | 1.318183036 |
| ILMN_2939503 | NM_153392.1    | TTC39A          | 1.316850274 |

|              |                |               |             |
|--------------|----------------|---------------|-------------|
| ILMN_1248713 | NM_007976.2    | F5            | 1.310219355 |
| ILMN_2429437 | NM_144819.2    | CCDC92        | 1.300199824 |
| ILMN_1228944 |                | CCNC          | 1.298612643 |
| ILMN_2998313 | NM_153163.3    | CADPS2        | 1.296203736 |
| ILMN_2596560 | NM_001005740.1 | PHACTR1       | 1.294740952 |
| ILMN_2888552 | NM_018861.2    | SLC1A4        | 1.291830819 |
| ILMN_2708203 | NM_009876.3    | CDKN1C        | 1.291610507 |
| ILMN_2627140 | XM_283804.7    | 9830001H06RIK | 1.290962375 |
| ILMN_1242617 |                | GPR23         | 1.284128851 |
| ILMN_2713305 | NM_172647.2    | F11R          | 1.282068951 |
| ILMN_1226499 | NM_010823.1    | MPL           | 1.277651896 |
| ILMN_2739303 | NM_172523.2    | SLC18A2       | 1.277032396 |
| ILMN_1258283 | NM_008518.1    | LTB           | 1.275048306 |
| ILMN_2641678 | NM_027208.1    | BDH2          | 1.273286079 |
| ILMN_2782248 | NM_026037.2    | MBOAT2        | 1.272428719 |
| ILMN_2687165 | NM_018763.1    | CHST2         | 1.270937296 |
| ILMN_1236953 | NM_027834.2    | 9130008F23RIK | 1.267302815 |
| ILMN_1226326 | XM_001471751.1 | 4933417E01RIK | 1.263656559 |
| ILMN_2829604 | NM_007378.1    | ABCA4         | 1.26150178  |
| ILMN_2725370 | NM_009582.3    | MAP3K12       | 1.260710626 |
| ILMN_1220280 | NM_031867.1    | TAS1R1        | 1.259249831 |
| ILMN_2535430 | XM_357131.1    | LOC383576     | 1.248768936 |
| ILMN_2703392 | XM_001479188.1 | LOC100047937  | 1.246993453 |
| ILMN_2959293 | NM_009477.1    | UPP1          | 1.246200593 |
| ILMN_2592059 | NM_019763.2    | SPEN          | 1.24580428  |
| ILMN_2640248 | NM_001081171.2 | LAMA5         | 1.244521482 |
| ILMN_1222258 | NM_011845.2    | MID2          | 1.24316606  |
| ILMN_2732747 | XR_031569.1    | LOC100044934  | 1.241403324 |
| ILMN_1217839 | NM_138742.1    | NAP1L3        | 1.240967652 |
| ILMN_2757574 | XM_357002.1    | 2410072D24RIK | 1.240776741 |
| ILMN_2702444 | NM_172753.3    | CSGALNACT1    | 1.238430479 |
| ILMN_1236298 | NM_177788.4    | EXOC3L        | 1.236384282 |
| ILMN_2814168 | NM_011925.1    | CD97          | 1.235659616 |
| ILMN_1231720 | NM_013866.2    | ZFP385A       | 1.233979746 |
| ILMN_2694175 | NM_011925.1    | CD97          | 1.233819831 |
| ILMN_1226114 | NM_175260.2    | MYH10         | 1.230716631 |
| ILMN_3052390 | NM_001001881.1 | 2510009E07RIK | 1.230429917 |
| ILMN_2662602 | NM_139300.3    | MYLK          | 1.230252943 |
| ILMN_2598374 | NM_144819.2    | CCDC92        | 1.229443251 |
| ILMN_1222824 | NM_138606.2    | PIM2          | 1.228605318 |
| ILMN_2998738 | NM_198657.1    | EG381438      | 1.22711086  |
| ILMN_2486573 | NM_009506.2    | VEGFC         | 1.226945353 |
| ILMN_1247894 | NM_033174.2    | SNURF         | 1.226400837 |
| ILMN_2594031 | NM_144847.1    | NRBP2         | 1.222497157 |
| ILMN_2462456 | XM_283804.7    | 9830001H06RIK | 1.220796319 |
| ILMN_2819951 | NM_172814.1    | LRP12         | 1.218196649 |

|              |                |                    |             |
|--------------|----------------|--------------------|-------------|
| ILMN_2884126 | NM_153537.3    | PHLDB1             | 1.217576269 |
| ILMN_2653166 | NM_027127.2    | GPX8               | 1.217364148 |
| ILMN_2667020 | NM_001042607.1 | RYK                | 1.210776611 |
| ILMN_1229340 | NM_173746.2    | OTTMUSG0000000446: | 1.209967758 |
| ILMN_3118584 | NM_212457.1    | BEX4               | 1.209122029 |
| ILMN_2699222 | XM_972773.1    | LOC669053          | 1.208063985 |
| ILMN_2749169 | NM_011312.2    | S100A5             | 1.206084571 |
| ILMN_2539486 | XM_357655.1    | LOC384453          | 1.205952701 |
| ILMN_1227845 | NM_144890.1    | BC018465           | 1.205596537 |
| ILMN_3148543 | NM_001025395.2 | SRC                | 1.205535615 |
| ILMN_2742861 | NM_001033335.2 | SERPINA3F          | 1.205396906 |
| ILMN_2749595 | NM_198411.2    | 2610204M08RIK      | 1.205216487 |
| ILMN_2680618 | NM_001004062.2 | CRTC1              | 1.204427528 |
| ILMN_2484147 | NM_001002272.2 | TRO                | 1.203858934 |
| ILMN_1220482 | NM_053201.3    | MAGEE1             | 1.202767863 |
| ILMN_3132223 | NM_175454.2    | C630004H02RIK      | 1.199377308 |
| ILMN_2944366 | NM_030704.1    | HSPB8              | 1.199193095 |
| ILMN_2445658 | XM_913941.2    | IGSF10             | 1.196915709 |
| ILMN_2777884 | NM_010144.2    | EPHB4              | 1.194832246 |
| ILMN_2669189 | NM_023063.1    | LIMA1              | 1.193565975 |
| ILMN_2909782 | NM_025846.1    | RRAS2              | 1.192850517 |
| ILMN_1220664 | NM_016965.2    | NCKAP1             | 1.190284229 |
| ILMN_2612178 | NM_053091.2    | COX4I2             | 1.189367248 |
| ILMN_2518412 |                | GRB10              | 1.189041351 |
| ILMN_1221298 | NM_017379.1    | TUBA8              | 1.188854263 |
| ILMN_2613908 | NM_007440.4    | ALOX12             | 1.187845838 |
| ILMN_1220360 | NM_001081413.1 | UNC13B             | 1.185486813 |
| ILMN_2825080 | NM_027570.3    | LDHD               | 1.184263072 |
| ILMN_2601946 | NM_001003948.1 | 5033414K04RIK      | 1.182027196 |
| ILMN_1246353 | XM_992327.1    | LOC207685          | 1.181601615 |
| ILMN_1239239 | NM_008969.3    | PTGS1              | 1.179531745 |
| ILMN_2793260 | NM_174850.2    | MICALL2            | 1.179341126 |
| ILMN_1226921 | XM_001006879.1 | LOC674004          | 1.178019139 |
| ILMN_1243602 | NM_028444.1    | PRKCDBP            | 1.175407685 |
| ILMN_2740407 | NM_001008548.2 | PDE2A              | 1.174011453 |
| ILMN_2928560 | NM_011587.1    | TIE1               | 1.173644021 |
| ILMN_2822825 | NM_176848.1    | FBXO2              | 1.172839296 |
| ILMN_1253191 |                | E230024B12RIK      | 1.172423508 |
| ILMN_2534635 | XM_195289.1    | LOC272683          | 1.16629367  |
| ILMN_1228564 | NM_021896.4    | GUCY1A3            | 1.161792285 |
| ILMN_2493464 | NM_010806.1    | MLLT4              | 1.161752716 |
| ILMN_2771991 |                | NDRG2              | 1.160998961 |
| ILMN_3159149 | NM_199057.2    | RUSC2              | 1.159580186 |
| ILMN_1221264 | NM_010637.1    | KLF4               | 1.157642662 |
| ILMN_2747031 | XM_131538.1    | DHCR24             | 1.156040755 |
| ILMN_2615810 | NM_021431.2    | NUDT11             | 1.154090088 |



|              |                |               |             |
|--------------|----------------|---------------|-------------|
| ILMN_1259461 | NM_010696.3    | LCP2          | 1.149953664 |
| ILMN_1249863 | NM_013730.4    | SLAMF1        | 1.147731981 |
| ILMN_3129213 | NM_001002272.2 | TRO           | 1.140670947 |
| ILMN_2735350 | NM_011819.1    | GDF15         | 1.136561235 |
| ILMN_1248811 | XM_001477566.1 | CTLA2B        | 1.134666735 |
| ILMN_2740207 | NM_028807.1    | 1200009I06RIK | 1.134270427 |
| ILMN_2776728 |                | 2610305D13RIK | 1.130531588 |
| ILMN_1246841 | NM_009046.2    | RELB          | 1.128273634 |
| ILMN_2713285 | NM_001077361.1 | FHL1          | 1.127701305 |
| ILMN_2730293 |                | PDE1B         | 1.12690898  |
| ILMN_2610609 | NM_027238.2    | TTC39B        | 1.123941588 |
| ILMN_1241211 | NM_021896.4    | GUCY1A3       | 1.123562735 |
| ILMN_2474858 | NM_009396.1    | TNFAIP2       | 1.123301152 |
| ILMN_2641228 | NM_028306.3    | HSPA12B       | 1.11802198  |
| ILMN_2703738 | NM_172814.3    | LRP12         | 1.117387654 |
| ILMN_1256565 | NM_001033291.2 | USP40         | 1.114745941 |
| ILMN_2690839 | NM_027102.2    | ESAM          | 1.113950576 |
| ILMN_2604029 | NM_008452.1    | KLF2          | 1.113302905 |
| ILMN_2620913 | NM_010567.1    | INPPL1        | 1.108626216 |
| ILMN_2670172 | NM_010577.2    | ITGA5         | 1.107377652 |
| ILMN_2959292 | NM_009477.1    | UPP1          | 1.107350317 |
| ILMN_2738090 | NM_153525.5    | TMEM41B       | 1.105472846 |
| ILMN_2823778 | NM_025436.1    | SC4MOL        | 1.105120654 |
| ILMN_2639662 | NM_027570.3    | LDHD          | 1.102263281 |
| ILMN_2998406 | NM_145078.1    | 2610305D13RIK | 1.101598217 |
| ILMN_2467185 | XM_358382.5    | DMXL2         | 1.100202823 |
| ILMN_2915118 | NM_013838.1    | TRPC6         | 1.099568922 |
| ILMN_2482821 | XM_992953.1    | LOC636875     | 1.098534232 |
| ILMN_2618935 | NM_026018.2    | PDZK1IP1      | 1.098386638 |
| ILMN_2627386 | NM_172451.2    | GALNT6        | 1.097896666 |
| ILMN_3117381 | NM_001077362.1 | FHL1          | 1.097101516 |
| ILMN_2630993 | NM_080555.2    | PPAP2B        | 1.095881153 |
| ILMN_2761585 | XM_358687.1    | 2400009B08RIK | 1.095391965 |
| ILMN_1227770 | NM_172622.2    | TRERF1        | 1.094954729 |
| ILMN_2775064 | XM_001476174.1 | EPB4.1L4B     | 1.094945595 |
| ILMN_2582110 |                | D630036H09RIK | 1.094740882 |
| ILMN_2710942 | NM_009693.1    | APOB          | 1.094711912 |
| ILMN_1237729 | XM_001474024.1 | LOC100045304  | 1.09305003  |
| ILMN_1230890 | NM_010232.3    | FMO5          | 1.090556764 |
| ILMN_2820703 | NM_001004157.2 | SCARF1        | 1.088862119 |
| ILMN_2523169 | XM_128641.3    | TREML1        | 1.086364876 |
| ILMN_1224034 | NM_008800.1    | PDE1B         | 1.086068063 |
| ILMN_2752940 | NM_053272.2    | DHCR24        | 1.085210393 |
| ILMN_2598074 | NM_015795.1    | FBXO16        | 1.0849015   |
| ILMN_2594009 | NM_008001.3    | FGD1          | 1.0810812   |
| ILMN_1214953 | NM_199057.2    | RUSC2         | 1.077967983 |

|              |                |                      |             |
|--------------|----------------|----------------------|-------------|
| ILMN_2632839 | NM_027917.1    | 1300007L22RIK        | 1.074833057 |
| ILMN_2609813 | NM_007695.2    | CHI3L1               | 1.074351939 |
| ILMN_2890328 | NM_019832.2    | GKAP1                | 1.072884406 |
| ILMN_2959372 | NM_027218.1    | CLEC4B1              | 1.071382511 |
| ILMN_1225528 | NM_175093.2    | TRIB3                | 1.070652588 |
| ILMN_2776095 | XM_001476670.1 | TTBK1                | 1.069934354 |
| ILMN_2870786 | NM_133995.1    | UPB1                 | 1.068530872 |
| ILMN_2965275 | NM_183144.1    | INPP5A               | 1.067666095 |
| ILMN_2810882 | NM_008908.1    | PPIC                 | 1.066906493 |
| ILMN_2981363 | NM_145158.2    | EMILIN2              | 1.06631956  |
| ILMN_2734097 | NM_007568.3    | BTC                  | 1.065531614 |
| ILMN_3043587 | NM_212457.1    | BEX4                 | 1.064712618 |
| ILMN_2842601 | NM_018762.1    | GP9                  | 1.062294929 |
| ILMN_2855310 | NM_010823.1    | MPL                  | 1.06077279  |
| ILMN_2750558 | NM_174857.3    | MAMDC2               | 1.060628112 |
| ILMN_1215713 | NM_020596.2    | EGR4                 | 1.059784734 |
| ILMN_1242258 |                | IGKV4-73_AJ231216_IC | 1.058067193 |
| ILMN_2993836 | NM_016747.2    | DLG3                 | 1.057961586 |
| ILMN_2671411 | NM_008450.2    | KLC1                 | 1.057272131 |
| ILMN_2500533 | NM_178114.3    | AMIGO2               | 1.05626063  |
| ILMN_2685921 | NM_009601.3    | CHRNB1               | 1.055158055 |
| ILMN_3128616 | NM_008840.2    | PIK3CD               | 1.053585092 |
| ILMN_2677772 | NM_029688.2    | SRXN1                | 1.049021084 |
| ILMN_2906489 | NM_026779.1    | MOCOS                | 1.048686468 |
| ILMN_2992047 | NM_175092.3    | RHOF                 | 1.048100737 |
| ILMN_3163110 | NM_008168.1    | GRIK5                | 1.047910396 |
| ILMN_2601215 | NM_007825.3    | CYP7B1               | 1.045347791 |
| ILMN_1215550 | NM_010567.1    | INPPL1               | 1.045010219 |
| ILMN_3161289 | NM_010311.3    | GNAZ                 | 1.044761403 |
| ILMN_2421890 |                | ACACB                | 1.043210497 |
| ILMN_2614161 | NM_146006.1    | LSS                  | 1.042153582 |
| ILMN_2777498 |                | IL1B                 | 1.04084121  |
| ILMN_1253224 | NM_053272.2    | DHCR24               | 1.03865227  |
| ILMN_2430906 | XM_001479552.1 | 2310051E17RIK        | 1.033826038 |
| ILMN_2868981 | NM_153078.1    | EHBP1                | 1.033003819 |
| ILMN_2603647 | NM_053109.2    | CLEC2D               | 1.03264283  |
| ILMN_2896843 | NM_054042.2    | CD248                | 1.030931352 |
| ILMN_1233537 |                | GUCY1A3              | 1.030234627 |
| ILMN_2487308 |                | TUBA8                | 1.029965027 |
| ILMN_2735865 | NM_009708.1    | RND2                 | 1.029908797 |
| ILMN_1234543 |                | TBXAS1               | 1.029306784 |
| ILMN_2928453 | NM_009662.2    | ALOX5                | 1.02218138  |
| ILMN_1236344 | NM_029601.1    | 1700019E19RIK        | 1.022038939 |
| ILMN_2608547 | NM_031198.2    | TCFEC                | 1.01933941  |
| ILMN_2896768 | NM_173047.2    | CBR3                 | 1.017976343 |
| ILMN_2947234 | NM_144811.3    | CBX7                 | 1.017598621 |

|              |                |                |             |
|--------------|----------------|----------------|-------------|
| ILMN_2595857 | NM_001039562.1 | ANKRD37        | 1.017436493 |
| ILMN_2859917 | NM_026837.1    | TMEM53         | 1.016219995 |
| ILMN_1254191 | NM_021460.1    | LIP1           | 1.015941745 |
| ILMN_1217328 | NM_010465.2    | HOXC6          | 1.010845037 |
| ILMN_2773215 | XM_001476174.1 | EPB4.1L4B      | 1.010594291 |
| ILMN_2608502 | NM_177308.2    | 9530019H2ORIK  | 1.009945614 |
| ILMN_2634689 | NM_001005608.2 | ITGB4          | 1.00814668  |
| ILMN_1249997 |                | PER            | 1.007062427 |
| ILMN_2649456 | NM_030024.2    | PRR15          | 1.006726843 |
| ILMN_2680307 |                | SEC14L1        | 1.006322766 |
| ILMN_2814484 | NM_026820.2    | IFITM1         | 1.004493755 |
| ILMN_1234747 |                | 4732458O05RIK  | 1.004366157 |
| ILMN_2713060 | NM_133778.2    | FAM131A        | 1.004322453 |
| ILMN_2744129 | NM_028037.3    | ACAD10         | 1.004068816 |
| ILMN_2700797 | NM_008908.3    | PPIC           | 1.002163856 |
| ILMN_1222733 | NM_011877.1    | PTPN21         | 1.0009187   |
| ILMN_2440530 | NM_012037.2    | VAT1           | 1.000431649 |
| ILMN_2751494 | NM_016866.2    | STK39          | 1.000233048 |
| ILMN_2711267 | NM_010664.1    | KRT18          | 1.000049149 |
| ILMN_1247127 |                | B930075F07     | 0.999350808 |
| ILMN_2763002 | NM_013509.2    | ENO2           | 0.999275511 |
| ILMN_1235016 | NM_177771.5    | KLHL18         | 0.998585244 |
| ILMN_1248734 | XM_899407.2    | 1500009L16RIK  | 0.998064053 |
| ILMN_2841290 | NM_009396.1    | TNFAIP2        | 0.997017802 |
| ILMN_2644350 | NM_009382.3    | THY1           | 0.996104978 |
| ILMN_2652500 | NM_029796.2    | LRG1           | 0.995938722 |
| ILMN_2518284 | NM_011807.2    | DLG2           | 0.99567193  |
| ILMN_1237670 | NM_009849.1    | ENTPD2         | 0.995639109 |
| ILMN_1248714 | NM_010016.2    | CD55           | 0.995097005 |
| ILMN_2794116 | NM_008851.1    | PITPNM1        | 0.994626335 |
| ILMN_1231627 | NM_133902.2    | SDSL           | 0.992633903 |
| ILMN_1249888 | NM_007405.2    | ADCY6          | 0.992085972 |
| ILMN_1254034 | AK019418.1     | SCL0002540.1_6 | 0.990080974 |
| ILMN_2516705 | NM_133995.1    | UPB1           | 0.990044619 |
| ILMN_2684316 | NM_008772.4    | P2RY1          | 0.98865314  |
| ILMN_2964522 | NM_010333.2    | EDG5           | 0.98661395  |
| ILMN_2916782 | NM_018816.1    | APOM           | 0.985632845 |
| ILMN_2907327 | NM_023742.1    | DTX2           | 0.984890536 |
| ILMN_2619330 | NM_013807.1    | PLK3           | 0.984072536 |
| ILMN_1230423 | NM_177364.3    | SH3PXD2B       | 0.983845015 |
| ILMN_2643096 | NM_175035.5    | GIMAP5         | 0.983215133 |
| ILMN_2593225 | NM_198048.1    | PRX            | 0.982269547 |
| ILMN_1213978 | NM_011216.2    | PTPRO          | 0.981928794 |
| ILMN_2743642 | NM_019984.2    | TGM1           | 0.979749243 |
| ILMN_2660471 | NM_007856.2    | DHCR7          | 0.978726079 |
| ILMN_1233864 | NM_008969.3    | PTGS1          | 0.978331138 |

|              |                |                    |             |
|--------------|----------------|--------------------|-------------|
| ILMN_1215670 | NM_027238.2    | TTC39B             | 0.977839594 |
| ILMN_2758717 | NM_178711.2    | PLSCR4             | 0.977539085 |
| ILMN_1248108 | NM_146106.1    | LYPLAL1            | 0.97719975  |
| ILMN_3105343 | NM_130895.2    | ADARB1             | 0.977181529 |
| ILMN_1234427 | NM_177778.4    | ARMC7              | 0.976548795 |
| ILMN_2655250 | NM_175150.3    | TXNDC15            | 0.976456644 |
| ILMN_1216279 | NM_016851.2    | IRF6               | 0.976081092 |
| ILMN_1225039 |                | SC5D               | 0.975450471 |
| ILMN_2588682 | NM_177583.4    | APH1B              | 0.974786509 |
| ILMN_2932453 | NM_008771.2    | P2RX1              | 0.972224418 |
| ILMN_2650915 | NM_172132.1    | JMJD2B             | 0.97199966  |
| ILMN_2704619 | NM_172274.1    | CC2D2A             | 0.971000072 |
| ILMN_1234702 | NM_173866.3    | GPT2               | 0.970678185 |
| ILMN_2597769 | NM_010514.2    | IGF2               | 0.969921584 |
| ILMN_1219017 |                | 5031436003RIK      | 0.968919806 |
| ILMN_2822934 | NM_001013384.1 | PODNL1             | 0.968890873 |
| ILMN_1236762 | NM_008148.3    | GP5                | 0.967660423 |
| ILMN_1254685 | NM_001033767.2 | EG240327           | 0.967495096 |
| ILMN_2710274 | NM_023055.1    | SLC9A3R2           | 0.964950559 |
| ILMN_3004931 | NM_175107.3    | 2310022A10RIK      | 0.964825005 |
| ILMN_2848163 | NM_021430.2    | RILPL1             | 0.964583927 |
| ILMN_2725414 | NM_007657.2    | CD9                | 0.964112704 |
| ILMN_2590923 | NM_177960.3    | IDI1               | 0.96358275  |
| ILMN_1249164 | NM_001025296.1 | DFFA               | 0.962426557 |
| ILMN_2669225 |                | TLE2               | 0.961044271 |
| ILMN_2748880 | NM_027845.1    | 4833414E09RIK      | 0.960626528 |
| ILMN_2692554 | NM_178781.2    | 9330186A19RIK      | 0.960087854 |
| ILMN_1218116 | NM_009755.2    | BMP1               | 0.95941045  |
| ILMN_1254031 | NM_010638.4    | KLF9               | 0.958533195 |
| ILMN_1235908 | NM_010634.2    | FABP5              | 0.956979428 |
| ILMN_2597210 | NM_146164.1    | LRCH4              | 0.955913679 |
| ILMN_2658908 | NM_013655.2    | CXCL12             | 0.955578936 |
| ILMN_2450767 |                | DUSP4              | 0.953571334 |
| ILMN_1228909 | XM_975070.1    | E230008N13RIK      | 0.953174162 |
| ILMN_3152792 | NM_011088.1    | PIRA11             | 0.952727608 |
| ILMN_2770866 | NM_011196.1    | PTGER3             | 0.950716326 |
| ILMN_2738655 | XM_001474669.1 | 1110021L09RIK      | 0.949759821 |
| ILMN_2821158 | NM_028037.1    | ACAD10             | 0.949441629 |
| ILMN_2937320 | NM_013928.2    | SCHIP1             | 0.948490047 |
| ILMN_1245518 | NM_020518.2    | VSIG2              | 0.948040267 |
| ILMN_2963700 | NM_053197.2    | SFXN3              | 0.947478871 |
| ILMN_2824954 | NM_001039115.1 | OTTMUSG0000000042: | 0.946877696 |
| ILMN_2659340 | NM_007689.4    | CHAD               | 0.945123766 |
| ILMN_2663374 | NM_013839.3    | NR1H3              | 0.944558675 |
| ILMN_2460662 | NM_009452.1    | TNFSF4             | 0.943427246 |
| ILMN_2767918 | NM_023065.3    | IFI30              | 0.94313907  |

|              |                |                     |                    |
|--------------|----------------|---------------------|--------------------|
| ILMN_2970167 | NM_025830.3    | WWP2                | 0.94300331         |
| ILMN_2829608 | NM_007378.1    | ABCA4               | 0.939514172        |
| ILMN_2600911 | NM_027892.2    | PPP1R12A            | 0.938665213        |
| ILMN_2443990 | NM_011386.2    | SKIL                | 0.938659333        |
| ILMN_2771738 | NM_010052.4    | DLK1                | 0.93735143         |
| ILMN_1259610 | NM_133983.3    | CD276               | 0.936699577        |
| ILMN_2761662 | NM_175021.2    | SAMD4B              | 0.936074828        |
| ILMN_2706906 | XM_001479188.1 | LOC100047937        | 0.93582555         |
| ILMN_2729452 | NM_024442.1    | CYP4F16             | 0.935345058        |
| ILMN_2744193 | NM_177725.2    | LRRC8               | 0.93397274         |
| ILMN_2721929 | NM_134250.1    | HAVCR2              | 0.933769146        |
| ILMN_2596183 | XM_359260.3    | SYDE1               | 0.931694602        |
| ILMN_2609182 | NR_003642.1    | 2900062L11RIK       | 0.930527487        |
| ILMN_2754717 | NM_001032414.1 | PEAR1               | 0.928214374        |
| ILMN_2827646 | NM_029537.1    | TMEM98              | 0.927436089        |
| ILMN_1236844 |                | A830094I09RIK       | 0.925483674        |
| ILMN_2772281 |                | EMILIN2             | 0.925254348        |
| ILMN_1238680 | NM_053187.2    | GOPC                | 0.923914371        |
| ILMN_1237518 | NM_138650.1    | DGKG                | 0.923206299        |
| ILMN_2471128 |                | A830073O21RIK       | 0.922645988        |
| ILMN_1247043 | NM_028235.1    | TTC30B              | 0.921909836        |
| ILMN_3122845 | NM_198622.1    | H1FX                | 0.917831099        |
| ILMN_2660541 | NM_178704.2    | DPY19L3             | 0.916785209        |
| ILMN_2706550 | NM_025491.3    | SUSD3               | 0.916232208        |
| ILMN_2620192 | NM_001004365.1 | ACTR3B              | 0.915565071        |
| ILMN_2495888 | AK008866.1     | SCL0002617.1_582    | 0.915008839        |
| ILMN_2441501 |                | CLSTN1              | 0.913895929        |
| ILMN_1240935 | NM_015772.2    | SALL2               | 0.913310131        |
| ILMN_2625940 |                | NEURL               | 0.913015291        |
| ILMN_1226293 | NM_028064.2    | SLC39A4             | 0.912674006        |
| ILMN_2674122 | NM_008862.3    | PKIA                | 0.911305659        |
| ILMN_1244424 | NM_007413.4    | ADORA2B             | 0.910313284        |
| ILMN_2781520 | NM_175326.2    | D330045A20RIK       | 0.907768707        |
| ILMN_2777359 |                | SERPINH1            | 0.907747869        |
| ILMN_2773800 | NM_011846.4    | MMP17               | 0.907485361        |
| ILMN_1258740 |                | C130022M03RIK       | 0.90627464         |
| ILMN_1260427 |                | TIMELESS            | 0.90558812         |
| ILMN_2450155 |                | IGLC2_J00595_IG_LAM | 0.905575039        |
| ILMN_1220198 | NM_175386.3    | LHFP                | 0.904657254        |
| ILMN_2626648 | XM_359275.1    |                     | Sep-05 0.904499604 |
| ILMN_2441335 |                | ABCG1               | 0.904168078        |
| ILMN_2987826 | NM_133974.3    | CDCP1               | 0.902325758        |
| ILMN_2953751 | NM_028777.1    | SEC14L1             | 0.901770743        |
| ILMN_2935734 | NM_194341.1    | AP1GBP1             | 0.900868911        |
| ILMN_2933346 | NM_001004365.1 | ACTR3B              | 0.900702108        |
| ILMN_1238357 | NM_213615.2    | A530032D15RIK       | 0.90010782         |

|              |                |               |             |
|--------------|----------------|---------------|-------------|
| ILMN_1244835 | NM_178760.3    | GPR107        | 0.899670907 |
| ILMN_1236811 |                | D330008I21RIK | 0.898184216 |
| ILMN_2606660 | NM_130859.2    | CARD10        | 0.897837602 |
| ILMN_2699488 | NM_008483.2    | LAMB2         | 0.896365857 |
| ILMN_1228029 | NM_008699.1    | NKX2-3        | 0.895229862 |
| ILMN_2766105 | NM_172883.2    | MFSD7A        | 0.89420022  |
| ILMN_1232435 | XM_284198.5    | MMRN1         | 0.894114266 |
| ILMN_2898917 | NM_026580.1    | OTUB2         | 0.893532402 |
| ILMN_2614759 | NM_011595.2    | TIMP3         | 0.893191043 |
| ILMN_1229161 | NM_007932.1    | ENG           | 0.892619048 |
| ILMN_1232697 | NM_009567.4    | ZFP93         | 0.892600399 |
| ILMN_1250403 | NM_017469.3    | GUCY1B3       | 0.891805072 |
| ILMN_1240202 | NM_173753.3    | FNIP1         | 0.890979639 |
| ILMN_2803138 | NM_178143.1    | PRKAA2        | 0.890664281 |
| ILMN_2823195 | NM_053177.1    | MCOLN1        | 0.890615471 |
| ILMN_1220397 | XM_001476544.1 | TTC28         | 0.889862277 |
| ILMN_2831273 | NM_025595.1    | MRPL51        | 0.889612446 |
| ILMN_2732795 | NM_001085387.1 | MYLC2PL       | 0.888051818 |
| ILMN_2682613 |                | IGFBP5        | 0.887093927 |
| ILMN_1228245 | NM_001033217.3 | PRICKLE1      | 0.885996187 |
| ILMN_1251390 | NM_011539.3    | TBXAS1        | 0.884374183 |
| ILMN_2658815 | NM_029537.1    | TMEM98        | 0.884235322 |
| ILMN_1228782 | XM_134383.4    | LPHN1         | 0.884213528 |
| ILMN_2627041 | NM_009142.3    | CX3CL1        | 0.882154675 |
| ILMN_2747472 | NM_175687.1    | A230050P20RIK | 0.881084065 |
| ILMN_1255644 | NM_007881.4    | ATN1          | 0.879848543 |
| ILMN_2827217 | NM_153508.2    | CLSTN3        | 0.879738946 |
| ILMN_2675449 | NM_009164.1    | SH3BP1        | 0.879315924 |
| ILMN_2724371 | NM_153537.3    | PHLDB1        | 0.878636011 |
| ILMN_1254671 | XM_148974.6    | BC034090      | 0.87859016  |
| ILMN_2911344 | NM_011636.1    | PLSCR1        | 0.877200045 |
| ILMN_2981542 | NM_008546.2    | MFAP2         | 0.876488463 |
| ILMN_1247463 |                | ROBO3         | 0.876387361 |
| ILMN_2653132 | NM_020008.1    | CLEC7A        | 0.875382004 |
| ILMN_2432508 | NM_026721.2    | SLC39A13      | 0.87533931  |
| ILMN_2640995 | NM_172287.2    | SPIRE2        | 0.874867716 |
| ILMN_2466926 | NM_019941.2    | ZFP235        | 0.874246905 |
| ILMN_2698564 | NM_008439.3    | KHK           | 0.873025754 |
| ILMN_2793844 | NM_028800.2    | STK40         | 0.872945158 |
| ILMN_1212828 | NM_173396.2    | TGIF2         | 0.872224249 |
| ILMN_2529392 | XM_284587.2    | LOC331139     | 0.872139923 |
| ILMN_2565436 |                | CACNB2        | 0.872123548 |
| ILMN_1220170 | NM_013690.2    | TEK           | 0.871842175 |
| ILMN_1246291 | NM_001098636.1 | PWWP2B        | 0.870804668 |
| ILMN_2737982 | NM_134062.1    | DAPK1         | 0.870520656 |
| ILMN_1227875 | NM_010222.1    | FKBP7         | 0.869508344 |

|              |                |               |             |
|--------------|----------------|---------------|-------------|
| ILMN_2702547 | NM_029173.3    | 4930519N16RIK | 0.868944303 |
| ILMN_2579719 |                | FUT8          | 0.868826244 |
| ILMN_2658961 | NM_016811.2    | DGKA          | 0.868120146 |
| ILMN_1252202 | NM_009397.2    | TNFAIP3       | 0.867821958 |
| ILMN_1233376 | NM_134117.1    | AW548124      | 0.867684777 |
| ILMN_2667829 | NM_008859.1    | PRKCQ         | 0.866884052 |
| ILMN_2715546 | NM_008161.2    | GPX3          | 0.866657274 |
| ILMN_3093626 | NM_145908.1    | PORCN         | 0.864313873 |
| ILMN_1256025 | XR_032462.1    | LOC100041137  | 0.864251395 |
| ILMN_2792351 | NM_024442.1    | CYP4F16       | 0.864132455 |
| ILMN_1254574 |                | E030034J16RIK | 0.863514316 |
| ILMN_3161168 | NM_001033488.1 | GM1964        | 0.862632945 |
| ILMN_1233469 |                | LDLR          | 0.862065259 |
| ILMN_2603888 | NM_153392.1    | TTC39A        | 0.860370471 |
| ILMN_1239380 | NM_013534.4    | LEPREL2       | 0.859963048 |
| ILMN_2630852 | NM_008371.4    | IL7           | 0.859913099 |
| ILMN_2631014 | NM_146135.1    | PIAS3         | 0.858500626 |
| ILMN_1224619 | NM_009177.4    | ST3GAL1       | 0.85799306  |
| ILMN_2626442 | NM_010867.2    | MYOM1         | 0.857844138 |
| ILMN_1230586 | NM_009421.3    | TRAF1         | 0.857355701 |
| ILMN_2752665 | NM_025897.1    | 1500003O22RIK | 0.855559111 |
| ILMN_1241128 | NM_026192.2    | CALCOCO1      | 0.854749335 |
| ILMN_2821263 | NM_133191.2    | EPS8L2        | 0.853650344 |
| ILMN_2690603 | NM_009263.1    | SPP1          | 0.8525303   |
| ILMN_2789239 | NM_011578.2    | TGFBR3        | 0.852162355 |
| ILMN_1258914 | NM_175328.2    | SLC6A15       | 0.851066856 |
| ILMN_2770270 | NM_183286.2    | DHRS13        | 0.849819755 |
| ILMN_2464999 | NM_011676.2    | UNC119        | 0.849487384 |
| ILMN_2426380 | NM_013835.2    | TROVE2        | 0.84856742  |
| ILMN_1229313 | NM_001013771.2 | GM973         | 0.846176993 |
| ILMN_2647898 | XM_001475162.1 | LOC100040736  | 0.845843136 |
| ILMN_2519488 | NM_152800.1    | TOR2A         | 0.845756402 |
| ILMN_2444799 |                | 0610031G08RIK | 0.844486223 |
| ILMN_1255047 | NM_178877.5    | NHEDC2        | 0.844313673 |
| ILMN_3146420 | NM_009194.2    | SLC12A2       | 0.84407791  |
| ILMN_1223188 | NM_001081008.1 | TAF1          | 0.843997951 |
| ILMN_2499264 |                | 4933428A15RIK | 0.843511689 |
| ILMN_1240165 | NM_027857.3    | ACY3          | 0.84326332  |
| ILMN_2812087 | NM_134083.2    | RCBTB2        | 0.842480601 |
| ILMN_2858106 | NM_009429.2    | TPT1          | 0.841550314 |
| ILMN_2985497 | NM_010872.1    | NAIP2         | 0.841530449 |
| ILMN_1239729 | NM_207682.2    | KIF1B         | 0.841379783 |
| ILMN_2506727 |                | 9430052C07RIK | 0.838670591 |
| ILMN_2678355 | NM_178114.3    | AMIGO2        | 0.838272942 |
| ILMN_3121255 | NM_001025250.2 | VEGFA         | 0.837782504 |
| ILMN_1217890 | NM_011101.2    | PRKCA         | 0.837016136 |

|              |                |               |                    |
|--------------|----------------|---------------|--------------------|
| ILMN_1220387 | NM_174989.3    | TICAM1        | 0.835913906        |
| ILMN_2449563 | NM_009329.3    | ZFP354A       | 0.835239852        |
| ILMN_1258737 |                | 1110017F19RIK | 0.834783011        |
| ILMN_3132186 | NM_177546.2    | PCYT1B        | 0.831151983        |
| ILMN_2740268 | NM_026580.3    | OTUB2         | 0.830312012        |
| ILMN_1253572 |                | 6720422M22RIK | 0.829897962        |
| ILMN_2725927 | NM_009251.1    | SERPINA3G     | 0.829336672        |
| ILMN_1242531 | NM_027920.4    |               | March8 0.828858051 |
| ILMN_2589318 | NM_010127.3    | POU6F1        | 0.828699337        |
| ILMN_2492716 | NM_028283.2    | UACA          | 0.828695197        |
| ILMN_1246429 | NM_145496.1    | DAK           | 0.828078198        |
| ILMN_1236175 | NM_009451.3    | TUBB4         | 0.827642412        |
| ILMN_1229828 | NM_172619.2    | ADAMTS10      | 0.827412863        |
| ILMN_2481902 |                | PLXNC1        | 0.82719267         |
| ILMN_2849449 | NM_010577.2    | ITGA5         | 0.826222028        |
| ILMN_2661650 | NM_139292.1    | REEP6         | 0.825777944        |
| ILMN_1214136 | XM_150180.1    | 2610005M20RIK | 0.825002472        |
| ILMN_2690596 | NM_010423.2    | HEY1          | 0.824791309        |
| ILMN_2458765 | NM_009643.1    | AHNAK         | 0.824351417        |
| ILMN_1250618 | NM_175537.3    | ZBTB38        | 0.82321483         |
| ILMN_2965835 | NM_010813.2    | MNT           | 0.822851691        |
| ILMN_2705747 | NM_054054.2    | BRDT          | 0.822598953        |
| ILMN_2755860 | NM_008265.3    | HOXA4         | 0.821855761        |
| ILMN_2732394 | NM_029420.1    | 2410170E21RIK | 0.820138359        |
| ILMN_3109360 | NM_201394.1    | PLEC1         | 0.820063583        |
| ILMN_2791028 | NM_007471.2    | APP           | 0.819748461        |
| ILMN_1253986 | XM_981375.2    | DLG5          | 0.819704268        |
| ILMN_2592486 | NM_009402.1    | PGLYRP1       | 0.819006049        |
| ILMN_3100125 | NM_028460.2    | PEAR1         | 0.818833153        |
| ILMN_2476405 |                | EGFP          | 0.818506931        |
| ILMN_2737163 | NM_009270.3    | SQLE          | 0.81799495         |
| ILMN_1225494 | NM_134065.3    | EPDR1         | 0.817924512        |
| ILMN_2419138 | NM_009502.4    | VCL           | 0.817420702        |
| ILMN_2710176 | NM_178929.3    | KAZALD1       | 0.817414847        |
| ILMN_1214066 | NM_153062.2    | SLC37A1       | 0.816031817        |
| ILMN_2467596 | NM_001048054.1 | DUSP16        | 0.815949419        |
| ILMN_2891274 | NM_001033320.2 | RLTPR         | 0.813640719        |
| ILMN_1234223 | NM_178911.4    | PLD4          | 0.813604459        |
| ILMN_2621148 | NM_008443.3    | KIF3A         | 0.813380722        |
| ILMN_2896639 | NM_013850.1    | ABCA7         | 0.81249893         |
| ILMN_2418426 | NM_009517.2    | ZMAT3         | 0.811481847        |
| ILMN_2950644 | NM_177073.3    | TNFRSF19L     | 0.811062928        |
| ILMN_1222658 | NM_013720.2    | MGA           | 0.8109507          |
| ILMN_2652077 | NM_028730.4    | PEX26         | 0.809244775        |
| ILMN_2626389 | NM_153057.3    | NOMO1         | 0.808679064        |
| ILMN_2514674 | NM_011916.2    | XRN1          | 0.808542813        |



|              |                |               |             |
|--------------|----------------|---------------|-------------|
| ILMN_1229246 | NM_030176.2    | SPATA2L       | 0.807437338 |
| ILMN_1214071 | NM_026820.2    | IFITM1        | 0.807145701 |
| ILMN_2847834 | NM_011676.2    | UNC119        | 0.807019746 |
| ILMN_2701332 | NM_175035.5    | GIMAP5        | 0.805777918 |
| ILMN_2473274 |                | PRKG1         | 0.805464754 |
| ILMN_3034877 | NM_008441.2    | KIF1B         | 0.805396261 |
| ILMN_1215737 | NM_178020.2    | HYAL3         | 0.804062157 |
| ILMN_2907972 | NM_028189.2    | B3GNT3        | 0.804013213 |
| ILMN_2917497 | NM_010189.1    | FCGRT         | 0.803823316 |
| ILMN_2642239 | NM_019408.1    | NFKB2         | 0.802958058 |
| ILMN_2689187 | NM_146155.3    | AHDC1         | 0.802917585 |
| ILMN_2610554 | NM_028411.2    | TMEM138       | 0.802051976 |
| ILMN_2655126 | NM_177157.4    | GCHFR         | 0.800781023 |
| ILMN_2798340 | NM_144794.1    | TMEM63A       | 0.800569158 |
| ILMN_1251856 | XM_132089.7    | GPR125        | 0.800302988 |
| ILMN_2796798 | NM_027464.1    | 5730469M10RIK | 0.800171723 |
| ILMN_2602024 | NM_001039657.1 | MTL5          | 0.799390124 |
| ILMN_2974798 | NM_010683.1    | LAMC1         | 0.79836119  |
| ILMN_3009463 | NM_011639.2    | TRIP6         | 0.796779406 |
| ILMN_1256740 | NM_175266.4    | EPM2AIP1      | 0.796235337 |
| ILMN_2729162 | NM_018820.4    | SERTAD1       | 0.795628156 |
| ILMN_2729607 | NM_011324.1    | SCNN1A        | 0.795324483 |
| ILMN_2734683 | NM_008047.4    | FSTL1         | 0.795132783 |
| ILMN_2625197 | NM_007955.2    | PTPRV         | 0.795057135 |
| ILMN_2731407 | NM_008108.4    | GDF3          | 0.79482784  |
| ILMN_1237432 | NM_194348.3    | ATG2A         | 0.794117599 |
| ILMN_2692723 | NM_008509.2    | LPL           | 0.793918499 |
| ILMN_2671128 | NM_177336.2    | B230373P09RIK | 0.793523665 |
| ILMN_3162431 | NM_001033139.2 | AI846148      | 0.793094832 |
| ILMN_2883326 | NM_011090.1    | PIRA3         | 0.792979538 |
| ILMN_2716876 | NM_026169.4    | FRMD8         | 0.792857826 |
| ILMN_3160107 | NM_001004435.2 | PIK3R6        | 0.792379887 |
| ILMN_2711772 | NM_174850.2    | MICALL2       | 0.791947948 |
| ILMN_2696592 |                | C77080        | 0.791621873 |
| ILMN_1243830 | NM_011077.2    | PHEX          | 0.791400415 |
| ILMN_2662926 | NM_007913.5    | EGR1          | 0.791164724 |
| ILMN_1236845 | NM_027469.3    | GFOD2         | 0.790875972 |
| ILMN_2795412 | NM_025326.2    | TMEM176A      | 0.790786886 |
| ILMN_2483633 |                | GRIK5         | 0.790668556 |
| ILMN_1215212 | NM_007483.2    | RHOB          | 0.790565636 |
| ILMN_2592823 | NM_021454.3    | CDC42EP5      | 0.790504162 |
| ILMN_2503655 | XM_001477269.1 | D2BWG1423E    | 0.790108668 |
| ILMN_2658804 | NM_009101.2    | RRAS          | 0.789533935 |
| ILMN_2712675 | NM_172698.2    | 4732418C07RIK | 0.787018017 |
| ILMN_2488360 | NM_011385.2    | SKI           | 0.786726149 |
| ILMN_2907473 | NM_134023.1    | TBC1D10A      | 0.78556496  |

|              |                |               |              |
|--------------|----------------|---------------|--------------|
| ILMN_1248555 | NM_029364.3    | GNS           | 0.784760358  |
| ILMN_1228475 | NM_009469.3    | ULK1          | 0.784107093  |
| ILMN_1219474 |                | 6430548M08RIK | 0.783717727  |
| ILMN_2595408 | XM_130807.1    | PLD1          | 0.783446614  |
| ILMN_2769945 |                | BC014795      | 0.783107706  |
| ILMN_2769191 | NM_011539.3    | TBXAS1        | 0.781588938  |
| ILMN_1218703 | NM_029432.1    | 4930402H24RIK | 0.780793387  |
| ILMN_2932662 | NM_026864.1    | RASL11A       | 0.780784755  |
| ILMN_2645917 | NM_029602.1    | 1700022C21RIK | 0.780595639  |
| ILMN_2833781 | NM_001033206.2 | PWWP2B        | 0.779770348  |
| ILMN_2484527 | NM_009505.3    | VEGFA         | 0.779753668  |
| ILMN_3088269 | NM_212486.2    | GIMAP8        | 0.779413646  |
| ILMN_2964042 | NM_007542.3    | BGN           | 0.77848278   |
| ILMN_2994299 | NM_019447.1    | HGFAC         | 0.778384818  |
| ILMN_2711075 | NM_013599.2    | MMP9          | 0.7777114828 |
| ILMN_2724451 | NM_172571.3    | FBF1          | 0.776469703  |
| ILMN_1225730 | NM_134469.3    | FDPS          | 0.775934416  |
| ILMN_3100276 | NM_027406.1    | ALDH1L1       | 0.7759286    |
| ILMN_1230498 | NM_207277.1    | A930005I04RIK | 0.775764127  |
| ILMN_2743421 | NM_007854.2    | SLC29A2       | 0.775161918  |
| ILMN_1249480 | XM_001002205.2 | 1300010F03RIK | 0.77515289   |
| ILMN_1235207 | NM_027171.2    | 2310057J16RIK | 0.774808815  |
| ILMN_1242248 | NM_022890.1    | CLDN12        | 0.774446478  |
| ILMN_3141165 | NM_008376.3    | GIMAP1        | 0.774233646  |
| ILMN_1232107 | XM_977338.1    | BEX2          | 0.774046529  |
| ILMN_1251233 | NM_025331.2    | GNG11         | 0.773200717  |
| ILMN_1245075 |                | 1810054D07RIK | 0.772934111  |
| ILMN_1224635 | NM_024169.3    | FKBP11        | 0.772757602  |
| ILMN_1227458 | NM_001004363.1 | NUAK1         | 0.77258577   |
| ILMN_2638473 | XM_355795.1    | 1190003M12RIK | 0.771721317  |
| ILMN_1224664 | NM_001001984.2 | FBXL11        | 0.770532296  |
| ILMN_1226228 | NM_178623.2    | 2010005J08RIK | 0.770486244  |
| ILMN_3126697 | NM_001039090.1 | SKIL          | 0.770485862  |
| ILMN_2446700 |                | B430007K19RIK | 0.769802603  |
| ILMN_1251494 |                | A630056H20RIK | 0.769293551  |
| ILMN_1252898 |                | SOX6          | 0.76905946   |
| ILMN_2464201 | XM_001479998.1 | 3110021A11RIK | 0.768022234  |
| ILMN_2920849 | NM_011091.1    | PIRA4         | 0.76765086   |
| ILMN_2642705 | NM_010499.3    | IER2          | 0.767402744  |
| ILMN_1228213 | NM_023065.3    | IFI30         | 0.767396375  |
| ILMN_3154269 | NM_198048.1    | PRX           | 0.766853528  |
| ILMN_2637742 | NM_011059.2    | PADI1         | 0.766681552  |
| ILMN_2700689 | XM_910375.2    | IBRDC3        | 0.76657451   |
| ILMN_1231254 | NM_008007.1    | FGF3          | 0.765742445  |
| ILMN_2748680 | NM_010210.2    | FHIT          | 0.765262102  |
| ILMN_1228018 | NM_172860.1    | CBFA2T2       | 0.765002605  |

|              |                |               |             |
|--------------|----------------|---------------|-------------|
| ILMN_3150811 | NM_001077364.1 | TSC22D3       | 0.763991659 |
| ILMN_1213692 | NM_021568.1    | PCBP3         | 0.763309658 |
| ILMN_1235822 | NM_001033371.2 | LRRC36        | 0.761862968 |
| ILMN_1242125 | NM_001004156.2 | PLEKHG5       | 0.761117146 |
| ILMN_2829646 | NM_026298.4    | IFT172        | 0.760772239 |
| ILMN_3161372 | NM_001033221.2 | AU023871      | 0.760700296 |
| ILMN_1235499 | NM_011173.2    | PROS1         | 0.76059378  |
| ILMN_2620942 | NM_178110.2    | TRIM62        | 0.760331522 |
| ILMN_1249727 | NM_024495.4    | CAR13         | 0.76013684  |
| ILMN_2926155 | NM_019547.1    | RBM38         | 0.759929225 |
| ILMN_1234413 |                | ADAMTS12      | 0.759809564 |
| ILMN_2728866 | NM_015769.1    | ERCC4         | 0.759554928 |
| ILMN_2605423 | NM_028771.2    | CCDC97        | 0.759430309 |
| ILMN_1233896 | XM_916287.2    | LOC637082     | 0.759284739 |
| ILMN_2469541 | NM_029979.3    | TRIM35        | 0.759108316 |
| ILMN_1216097 | XM_924862.2    | GM684         | 0.75812121  |
| ILMN_1246724 | NM_028835.3    | ATG7          | 0.756980739 |
| ILMN_1217998 |                | EPB4.1L1      | 0.756698616 |
| ILMN_2794051 | NM_172734.2    | STK38L        | 0.75587619  |
| ILMN_2689731 | NM_176933.4    | DUSP4         | 0.754526803 |
| ILMN_1247198 | NM_174992.2    | BC004728      | 0.753774484 |
| ILMN_1250956 |                | 6330414G02RIK | 0.753355598 |
| ILMN_2939681 | NM_017372.2    | LYZS          | 0.753290153 |
| ILMN_2955362 | NM_144931.1    | APPBP1        | 0.752499648 |
| ILMN_2418324 | NM_030180.2    | USP54         | 0.752388233 |
| ILMN_3163539 | NM_028601.2    | ZMIZ2         | 0.751793939 |
| ILMN_2715931 | XM_001479038.1 | LOC100042540  | 0.751757172 |
| ILMN_2717861 | NM_183144.1    | INPP5A        | 0.751433302 |
| ILMN_2737479 | NM_031406.2    | SLC12A9       | 0.751285537 |
| ILMN_1218247 | XM_974900.1    | PALLD         | 0.751241545 |
| ILMN_2612283 | NM_008090.4    | GATA2         | 0.751112233 |
| ILMN_2675000 | NM_029070.2    | 4930511J11RIK | 0.751048946 |
| ILMN_1257200 | NM_183149.1    | ZFP598        | 0.749868302 |
| ILMN_3079919 | NM_009643.1    | AHNAK         | 0.749804986 |
| ILMN_2630605 | NM_007984.2    | FSCN1         | 0.748280501 |
| ILMN_2677207 | XR_033948.1    | LOC100047788  | 0.74802766  |
| ILMN_2626428 | XM_979045.1    | BC030863      | 0.748014156 |
| ILMN_2608811 | NM_173047.2    | CBR3          | 0.74777131  |
| ILMN_2501605 | NM_008855.2    | PRKCB         | 0.746964686 |
| ILMN_1221657 | NM_009764.2    | BRCA1         | 0.746139222 |
| ILMN_2498539 |                | 1700054E11RIK | 0.745478221 |
| ILMN_1237964 | NM_013709.4    | SH3YL1        | 0.745096683 |
| ILMN_2774001 | NM_020035.1    | PIGO          | 0.744841112 |
| ILMN_2680308 | NM_028777.2    | SEC14L1       | 0.744688936 |
| ILMN_1226838 | NM_053267.1    | SEPM          | 0.74326378  |
| ILMN_1240779 |                | OSP94         | 0.743118703 |

|              |                |               |             |
|--------------|----------------|---------------|-------------|
| ILMN_3102467 | NM_033475.2    | RAB34         | 0.742576443 |
| ILMN_2902492 | NM_178728.3    | AB112350      | 0.742289161 |
| ILMN_2698449 | NM_010415.1    | HBEGF         | 0.741090068 |
| ILMN_2952466 | NM_013835.1    | TROVE2        | 0.740869666 |
| ILMN_2678661 | NM_007985.2    | FANCC         | 0.740830346 |
| ILMN_2631610 | NM_172514.3    | TMEM71        | 0.740788051 |
| ILMN_2909597 | NM_134250.1    | HAVCR2        | 0.740447381 |
| ILMN_1229911 | NM_012026.2    | RGNEF         | 0.740106384 |
| ILMN_1238433 | NM_011254.2    | RBP1          | 0.739981067 |
| ILMN_2678745 | XM_147000.1    | 2300004C15RIK | 0.739803708 |
| ILMN_2754598 | NM_139153.1    | CENTG3        | 0.739457092 |
| ILMN_2431871 |                | FBXO30        | 0.738450271 |
| ILMN_2648089 | NM_207213.1    | SNX25         | 0.738025272 |
| ILMN_2556989 |                | 6430526N21RIK | 0.737399584 |
| ILMN_2940446 | NM_016811.2    | DGKA          | 0.737267123 |
| ILMN_2619316 | NM_011170.1    | PRNP          | 0.737246872 |
| ILMN_1255363 | NM_153573.1    | FKBP14        | 0.736133776 |
| ILMN_2484278 |                | 9930031P18RIK | 0.735713331 |
| ILMN_3155915 | NM_134062.1    | DAPK1         | 0.735632358 |
| ILMN_1230054 | NM_175312.3    | B630005N14RIK | 0.734083427 |
| ILMN_2987984 | NM_009113.3    | S100A13       | 0.733217933 |
| ILMN_2722938 | NM_008654.1    | MYD116        | 0.73297832  |
| ILMN_1224665 | NM_001081415.1 | SAMD1         | 0.732642772 |
| ILMN_2661125 | NM_019791.2    | MAGED1        | 0.732526078 |
| ILMN_1231492 | NM_008397.3    | ITGA6         | 0.732110943 |
| ILMN_2955973 | NM_013870.1    | SMTN          | 0.731984732 |
| ILMN_1238535 |                | 4832420L08RIK | 0.731417256 |
| ILMN_1230766 | NM_013883.1    | SCMH1         | 0.731406931 |
| ILMN_2682928 | NM_030690.2    | RAI14         | 0.730716849 |
| ILMN_1216721 | NM_007668.3    | CDK5          | 0.73009739  |
| ILMN_1239724 | NM_011185.3    | PSMB1         | 0.730056299 |
| ILMN_2712867 | NM_011594.3    | TIMP2         | 0.730005868 |
| ILMN_2907989 | NM_144546.3    | ZFP119        | 0.729110019 |
| ILMN_2537343 | XM_890398.1    | EG625835      | 0.7286266   |
| ILMN_1233075 | NM_007949.4    | ERCC2         | 0.728286461 |
| ILMN_2793329 | NM_013541.1    | GSTP1         | 0.72825143  |
| ILMN_1218228 | NM_001029938.1 | RILP          | 0.726326502 |
| ILMN_2758198 | NM_146126.1    | SORD          | 0.726320859 |
| ILMN_2718149 | NM_152134.1    | HOMER1        | 0.726113783 |
| ILMN_2775767 | XM_001481238.1 | LOC100043919  | 0.726032491 |
| ILMN_2895557 | NM_008114.2    | GFI1B         | 0.725753272 |
| ILMN_2649101 | NM_010877.4    | NCF2          | 0.72561967  |
| ILMN_2993109 | NM_029083.1    | DDIT4         | 0.725348693 |
| ILMN_2764781 | NM_145629.1    | PLS3          | 0.725273858 |
| ILMN_2704134 | NM_199200.2    | FAM171A2      | 0.724787142 |
| ILMN_2741189 | NM_175684.4    | FCHSD1        | 0.724546185 |

|              |                |               |             |
|--------------|----------------|---------------|-------------|
| ILMN_1249046 | NM_027294.2    | CMTM8         | 0.724165636 |
| ILMN_2508416 |                | SOLH          | 0.72343169  |
| ILMN_3096592 | NM_001006664.2 | EPB4.1L1      | 0.723145574 |
| ILMN_2900462 | NM_016745.2    | ATP2A3        | 0.722990288 |
| ILMN_1234082 |                | SREBF2        | 0.722953106 |
| ILMN_2533339 | XM_150129.3    | LOC234582     | 0.722559462 |
| ILMN_2950814 | NM_001033448.1 | GM962         | 0.722279337 |
| ILMN_3130403 | NM_174992.3    | BC004728      | 0.722023857 |
| ILMN_2689274 | NM_030238.2    | DYNC1H1       | 0.721830872 |
| ILMN_2648618 | NM_025445.4    | ARFGAP3       | 0.720999794 |
| ILMN_3138028 | NM_001040112.1 | ARAP1         | 0.720566486 |
| ILMN_2915279 | NM_008619.1    | MOV10         | 0.720542968 |
| ILMN_2676056 | NM_009702.1    | AQR           | 0.720456988 |
| ILMN_2955312 | NM_029296.1    | 1700001C19RIK | 0.720187064 |
| ILMN_2438849 | NM_207255.1    | ZFP532        | 0.720172908 |
| ILMN_1252454 |                | 4921531D08RIK | 0.718262443 |
| ILMN_1217926 | XM_127591.4    | 2310021P13RIK | 0.71768917  |
| ILMN_3160688 | NM_001033159.2 | ZFP597        | 0.717495425 |
| ILMN_1231805 | NM_001081309.1 | PIK3R4        | 0.716942334 |
| ILMN_1239055 | NM_011723.2    | XDH           | 0.716938232 |
| ILMN_2987161 | NM_146176.1    | CNOT3         | 0.716847671 |
| ILMN_2839788 | NM_011527.1    | TAL1          | 0.716840945 |
| ILMN_1213261 | XM_355890.1    | 2210412E05RIK | 0.716463898 |
| ILMN_1224447 | XM_356351.1    | LOC382237     | 0.716216959 |
| ILMN_1243052 | NM_199027.2    | ZFP335        | 0.71594785  |
| ILMN_1255277 | NM_144528.1    | RNF126        | 0.715638961 |
| ILMN_2712151 | NM_026985.1    | 1810033B17RIK | 0.715556596 |
| ILMN_2615547 | NM_030262.3    | POFUT2        | 0.715370034 |
| ILMN_1234519 | NM_021427.1    | A830059I20RIK | 0.713496129 |
| ILMN_2622735 | NM_172281.1    | RNF40         | 0.713492602 |
| ILMN_2909105 | NM_027773.1    | 2310047D13RIK | 0.712680122 |
| ILMN_2677921 | NM_139307.2    | VASN          | 0.712491912 |
| ILMN_2897891 | NM_015811.1    | RGS1          | 0.712205031 |
| ILMN_2656614 | NM_001081335.1 | PARC          | 0.711953485 |
| ILMN_2745876 | NM_145536.1    | BC020535      | 0.711880781 |
| ILMN_3120194 | NM_178754.2    | ARHGAP6       | 0.711805944 |
| ILMN_2495703 | NM_001039162.1 | CLIP2         | 0.711312865 |
| ILMN_3080371 | NM_001037997.1 | FERT2         | 0.710789271 |
| ILMN_2614246 | NM_025926.1    | DNAJB4        | 0.710440733 |
| ILMN_2762509 | NM_011986.2    | NCDN          | 0.709742461 |
| ILMN_1246573 | NM_138304.1    | CALML4        | 0.709658709 |
| ILMN_2866327 | NM_008861.2    | PKD2          | 0.709626959 |
| ILMN_2660461 | NM_029958.1    | LCN12         | 0.708843358 |
| ILMN_2680142 | NM_009673.1    | ANXA5         | 0.707030159 |
| ILMN_1250417 | NM_080435.1    | ADCY4         | 0.706667416 |
| ILMN_3160361 | NM_001004435.2 | PIK3R6        | 0.705916    |

|              |                |               |             |
|--------------|----------------|---------------|-------------|
| ILMN_1248850 | NM_145929.1    | GGA1          | 0.705177169 |
| ILMN_1259022 | NM_001081006.1 | ETL4          | 0.704657515 |
| ILMN_2649291 | NM_021460.1    | LIP1          | 0.703326596 |
| ILMN_2902979 | NM_007987.1    | FAS           | 0.702492003 |
| ILMN_1214631 | NM_133770.1    | ADCK4         | 0.702140581 |
| ILMN_1234549 | NM_001079876.1 | GAS2L3        | 0.70204669  |
| ILMN_1214189 | NM_001081342.1 | GPR133        | 0.701507069 |
| ILMN_2593994 | XM_001473131.1 | 5033430I15RIK | 0.70144006  |
| ILMN_2942011 | NM_028783.2    | ROBO4         | 0.701408    |
| ILMN_2740755 | NM_030680.1    | UPF1          | 0.701246633 |
| ILMN_1221501 | NM_027464.3    | 5730469M10RIK | 0.700404828 |
| ILMN_2696026 | NM_173788.3    | NPR2          | 0.700149385 |
| ILMN_2799596 | NM_178926.2    | AI662250      | 0.699693402 |
| ILMN_2687204 | NM_133895.1    | SLC15A4       | 0.698984784 |
| ILMN_1245994 | NM_010227.2    | FLNA          | 0.698158695 |
| ILMN_2995549 | NM_198306.1    | GALNT9        | 0.697729702 |
| ILMN_1222795 |                | CMKBR2        | 0.697536791 |
| ILMN_2782402 | NM_019632.1    | NAPB          | 0.697357143 |
| ILMN_1256171 | NM_198167.2    | TMEM63B       | 0.696482744 |
| ILMN_2461320 |                | AU020206      | 0.6961959   |
| ILMN_2426190 | NM_001081229.1 | TSC22D2       | 0.696155018 |
| ILMN_1223598 | NM_033218.1    | SREBF2        | 0.695906381 |
| ILMN_1212693 | NM_175483.5    | SNX33         | 0.695335304 |
| ILMN_1245335 | NM_176995.2    | C230078M08RIK | 0.695324927 |
| ILMN_2933692 | NM_030680.1    | UPF1          | 0.695178156 |
| ILMN_2671266 | NM_027081.3    | FAM116B       | 0.694721859 |
| ILMN_2820877 | NM_011285.1    | RPGR          | 0.69450544  |
| ILMN_2664224 | NM_010145.2    | EPHX1         | 0.694246963 |
| ILMN_1218069 | NM_021367.1    | TSLP          | 0.694018833 |
| ILMN_2745993 | NM_199307.1    | ECE1          | 0.693964394 |
| ILMN_2728521 | NM_011421.1    | SMPD1         | 0.693703119 |
| ILMN_3162394 | XM_001475293.1 | LOC100040799  | 0.693608054 |
| ILMN_2450491 | NM_015799.3    | TRFR2         | 0.69353676  |
| ILMN_3009469 | NM_011639.2    | TRIP6         | 0.693043111 |
| ILMN_1245531 | NM_001081324.1 | NETO2         | 0.692928452 |
| ILMN_2712490 | XM_917443.2    | TMCC1         | 0.692844932 |
| ILMN_3127932 | NM_026013.2    | TMEM77        | 0.692471608 |
| ILMN_1258735 | NM_008405.3    | ITGB2L        | 0.692322965 |
| ILMN_2860645 | NM_145545.2    | GBP6          | 0.691856855 |
| ILMN_2638333 | NM_183426.1    | SBNO2         | 0.691431965 |
| ILMN_1238558 | NM_019689.2    | ARID3B        | 0.691152667 |
| ILMN_2540866 |                | BC038881      | 0.69045142  |
| ILMN_2607040 | NM_027165.2    | CDK3          | 0.689669007 |
| ILMN_2760963 | NM_177030.3    | DOCK6         | 0.689432965 |
| ILMN_2697279 | NM_145540.2    | INTS3         | 0.689089174 |
| ILMN_2856187 | NM_026327.3    | 1810048J11RIK | 0.688627202 |

|              |                |               |             |
|--------------|----------------|---------------|-------------|
| ILMN_2871359 | NM_001039039.1 | EG622320      | 0.68854848  |
| ILMN_2651698 | NM_175273.2    | 2310046006RIK | 0.68842204  |
| ILMN_1214822 | NM_013529.2    | GFPT2         | 0.688295516 |
| ILMN_2972748 | NM_023580.2    | EPHA1         | 0.687882388 |
| ILMN_2704186 |                | 5031439A09RIK | 0.68762873  |
| ILMN_2588556 | NM_027264.1    | 2610041B18RIK | 0.687564435 |
| ILMN_2890284 | NM_028043.2    | D1BWG0212E    | 0.686663092 |
| ILMN_2726808 |                | 4930553M18RIK | 0.686387667 |
| ILMN_2860649 | NM_145545.2    | GBP6          | 0.685884203 |
| ILMN_2979776 | NM_029924.1    | MBD5          | 0.685529334 |
| ILMN_2752470 |                | HCR           | 0.685308139 |
| ILMN_1247053 | NM_172945.2    | ANKRD13B      | 0.684673977 |
| ILMN_2901029 | NM_207255.1    | ZFP532        | 0.684642232 |
| ILMN_2713538 | NM_009755.2    | BMP1          | 0.684319567 |
| ILMN_2783223 | NM_001013828.1 | LOC435565     | 0.683992158 |
| ILMN_2922560 | NM_025807.1    | SLC16A9       | 0.683946527 |
| ILMN_1256528 | NM_029798.2    | FLYWCH2       | 0.683042409 |
| ILMN_2740628 | NM_013865.1    | NDRG3         | 0.683006684 |
| ILMN_1240318 | NM_011405.3    | SLC7A7        | 0.681991898 |
| ILMN_2656776 | NM_183321.1    | BC053749      | 0.681870063 |
| ILMN_1217118 | NM_032003.1    | ENPP5         | 0.681606158 |
| ILMN_1253008 | NM_009338.3    | ACAT2         | 0.681594    |
| ILMN_3103233 | NM_010319.3    | GNG7          | 0.681199818 |
| ILMN_1250438 | NM_010807.3    | MARCKSL1      | 0.681156324 |
| ILMN_2706677 | NM_175326.4    | D330045A20RIK | 0.680616828 |
| ILMN_1230997 | NM_028335.1    | ZFP248        | 0.680286424 |
| ILMN_2644632 | NM_009295.1    | STXBP1        | 0.680252006 |
| ILMN_3158633 | NM_026833.1    | ORF19         | 0.68005928  |
| ILMN_1234301 | NM_029998.2    | 6030458C11RIK | 0.679747648 |
| ILMN_2972063 | NM_027086.1    | UBL7          | 0.679492825 |
| ILMN_2759114 | NM_153582.4    | CMTM4         | 0.679302843 |
| ILMN_2516833 | NM_199449.2    | ZHX2          | 0.679184253 |
| ILMN_1224936 | NM_027115.2    | MAPK1IP1      | 0.679004756 |
| ILMN_1228020 | NM_173366.1    | 1500010G04RIK | 0.67854771  |
| ILMN_1231104 | NM_010897.1    | NF1           | 0.678160916 |
| ILMN_2604548 | NM_016758.2    | RGS14         | 0.677994    |
| ILMN_2805672 | NM_011074.1    | PFTK1         | 0.677954432 |
| ILMN_2429970 | NM_031177.2    | IFT122        | 0.677695274 |
| ILMN_2461209 |                | 2810449M09RIK | 0.677583879 |
| ILMN_2670778 | NM_207682.2    | KIF1B         | 0.677580462 |
| ILMN_2722346 |                | IMAP38        | 0.677005836 |
| ILMN_2653972 | NM_177150.2    | CENPT         | 0.676852284 |
| ILMN_2855397 | NM_008244.2    | HGS           | 0.676311887 |
| ILMN_1238590 | XM_125817.6    | BBS10         | 0.67624707  |
| ILMN_1232601 | NM_007805.4    | CYB561        | 0.676094118 |
| ILMN_2688415 | XM_001002205.2 | 1300010F03RIK | 0.675726136 |

|              |                |               |             |
|--------------|----------------|---------------|-------------|
| ILMN_2723474 | NM_009624.2    | ADCY9         | 0.67525521  |
| ILMN_2839877 | NM_172637.1    | HECTD2        | 0.674986679 |
| ILMN_2928160 | NM_011690.2    | VARS          | 0.674103597 |
| ILMN_3130768 | NM_028407.3    | GCAP14        | 0.674061239 |
| ILMN_2623531 | NM_025898.3    | NAPA          | 0.673897836 |
| ILMN_2766493 | NM_026637.3    | A030007L17RIK | 0.6736178   |
| ILMN_1258376 | NM_001033525.2 | KCNK6         | 0.673490082 |
| ILMN_1241910 | NM_025550.2    | PSMD6         | 0.673442872 |
| ILMN_3101732 | NM_009303.2    | SYNGR1        | 0.673339547 |
| ILMN_2742075 | NM_009841.3    | CD14          | 0.673229047 |
| ILMN_2715744 | NM_011952.1    | MAPK3         | 0.671778244 |
| ILMN_2744909 | NM_177910.2    | GMPPB         | 0.671745389 |
| ILMN_3001481 | NM_009601.3    | CHRNB1        | 0.671404061 |
| ILMN_1230037 | XM_915679.2    | 2700023E23RIK | 0.671332649 |
| ILMN_2467534 | NM_031156.2    | IDE           | 0.671111613 |
| ILMN_2621433 | NM_054071.1    | FGFRL1        | 0.671065521 |
| ILMN_2957617 | NM_029643.2    | GPR172B       | 0.670662225 |
| ILMN_2967294 | NM_010047.1    | DGCR6         | 0.670303944 |
| ILMN_2768841 | NM_024436.1    | RAB22A        | 0.670228147 |
| ILMN_1224855 | XM_620286.3    | SAMD9L        | 0.670059373 |
| ILMN_2959285 | NM_145427.1    | ATPAF2        | 0.669705619 |
| ILMN_2971999 | NM_001033484.1 | IQGAP3        | 0.669621095 |
| ILMN_3011294 | NM_001012517.2 | FUT10         | 0.668260508 |
| ILMN_1232971 |                | 6530415H11RIK | 0.668157962 |
| ILMN_2725617 | NM_008439.3    | KHK           | 0.667965854 |
| ILMN_1255302 |                | D230046F09RIK | 0.667703315 |
| ILMN_2944272 | NM_174847.1    | 5830404H04RIK | 0.667548622 |
| ILMN_1255207 | XM_001478817.1 | LOC100047749  | 0.667114238 |
| ILMN_2686252 | NM_178795.3    | HISPPD2A      | 0.666889411 |
| ILMN_1226801 | NM_172817.1    | ZFP647        | 0.666777239 |
| ILMN_2595387 | NM_194346.2    | RNF31         | 0.666663454 |
| ILMN_3102736 | NM_001033302.1 | GM129         | 0.66661633  |
| ILMN_2657682 | XM_131083.2    | 2010308M01RIK | 0.6665137   |
| ILMN_3006123 | NM_012055.1    | ASNS          | 0.666278099 |
| ILMN_3002875 | NM_015805.2    | ATP9B         | 0.66556077  |
| ILMN_1213316 | NM_023626.4    | ING3          | 0.665210205 |
| ILMN_3160574 | NM_177101.4    | 4833442J19RIK | 0.665013409 |
| ILMN_2730831 | XM_130609.2    | 4921517L17RIK | 0.664779637 |
| ILMN_2464693 | NM_030220.3    | SP2           | 0.66453376  |
| ILMN_1238893 | NM_023684.2    | LIME1         | 0.662966473 |
| ILMN_2861123 | NM_144916.1    | TMEM150       | 0.662803721 |
| ILMN_2713879 | NM_146122.2    | DENND1A       | 0.662790632 |
| ILMN_2622761 | NM_025835.2    | PCCB          | 0.662464703 |
| ILMN_2762380 | NM_199016.2    | ENPP4         | 0.661889205 |
| ILMN_2749138 | NM_001081050.1 | PARD3B        | 0.661784003 |
| ILMN_2668224 | NM_001081083.1 | ARMC3         | 0.661607001 |



|              |                |               |             |
|--------------|----------------|---------------|-------------|
| ILMN_2989706 | NM_011034.2    | PRDX1         | 0.661488011 |
| ILMN_2993334 | NM_024413.1    | PLEKHF1       | 0.659652124 |
| ILMN_1241455 | XM_204182.3    | 1520402A15RIK | 0.659648177 |
| ILMN_2622983 | NM_013642.2    | DUSP1         | 0.658362739 |
| ILMN_2979089 | NM_021396.1    | PDCD1LG2      | 0.658266613 |
| ILMN_2700338 | NM_198302.2    | RBM11         | 0.658120527 |
| ILMN_1228211 | NM_009363.3    | TFF2          | 0.657996297 |
| ILMN_3002505 | NM_022419.1    | ABHD8         | 0.657742404 |
| ILMN_3028575 | NM_009303.2    | SYNGR1        | 0.657092693 |
| ILMN_1224898 | NM_008132.2    | GLRP1         | 0.656998043 |
| ILMN_1250435 | NM_025856.2    | 1700029G01RIK | 0.656371925 |
| ILMN_1227065 | NM_175684.4    | FCHSD1        | 0.655925112 |
| ILMN_2740764 | NM_019924.1    | RPS6KA4       | 0.655806135 |
| ILMN_2774486 | NM_133217.2    | BCDO2         | 0.655727611 |
| ILMN_2802311 | NM_001033458.1 | GM1673        | 0.655594715 |
| ILMN_2675674 | NM_153807.1    | BC018371      | 0.655575787 |
| ILMN_1212959 | NM_172371.3    | SLC16A13      | 0.654849814 |
| ILMN_1218842 | XM_355021.1    | LOC381105     | 0.654823554 |
| ILMN_1213779 | NM_194348.3    | ATG2A         | 0.654602342 |
| ILMN_1227282 | NM_146064.1    | SOAT2         | 0.654361575 |
| ILMN_2467513 |                | 2810468N07RIK | 0.654105758 |
| ILMN_1213117 | NM_134125.3    | TRIP10        | 0.65389107  |
| ILMN_2503987 | NM_001025594.1 | ZBTB43        | 0.653179461 |
| ILMN_2868131 | NM_133779.2    | PIGT          | 0.653051539 |
| ILMN_1224114 | NM_010744.3    | TMED1         | 0.653034022 |
| ILMN_2792485 | NM_144839.1    | UBE2E2        | 0.652803477 |
| ILMN_2902228 | NM_175484.1    | CORO2B        | 0.652048368 |
| ILMN_1244845 | NM_026272.2    | NARF          | 0.652032721 |
| ILMN_2918278 | NM_001033363.1 | BC025920      | 0.651851962 |
| ILMN_2956092 | NM_178045.3    | RASSF4        | 0.650488563 |
| ILMN_2715749 | NM_030675.2    | KRIT1         | 0.650018334 |
| ILMN_2618526 | NM_178728.5    | NAPEPLD       | 0.649645252 |
| ILMN_2714534 | NM_008927.3    | MAP2K1        | 0.649577302 |
| ILMN_2543108 |                | 2310047D13RIK | 0.649108974 |
| ILMN_2647427 | NM_028883.2    | 4632415K11RIK | 0.64839824  |
| ILMN_2441482 |                | 8430429K09RIK | 0.648304286 |
| ILMN_2524120 | XM_889570.2    | 1700013G10RIK | 0.647628294 |
| ILMN_2695181 | NM_013870.2    | SMTN          | 0.647451195 |
| ILMN_3161652 | NM_153197.3    | CLEC4A3       | 0.647393675 |
| ILMN_1250103 | NM_019725.1    | TLE2          | 0.647291661 |
| ILMN_1237961 | NM_138719.3    | GNB5          | 0.646687768 |
| ILMN_2662675 | NM_172698.2    | 4732418C07RIK | 0.64663988  |
| ILMN_2454230 |                | VTI1A         | 0.646310504 |
| ILMN_1234190 | XM_357002.5    | PSMA8         | 0.646210807 |
| ILMN_1225662 | XM_994504.1    | 1700016J18RIK | 0.646197474 |
| ILMN_2959787 | NM_026553.2    | YIF1A         | 0.645878454 |

|              |                |               |             |
|--------------|----------------|---------------|-------------|
| ILMN_2744936 | NM_027838.2    | SENP8         | 0.645446911 |
| ILMN_2796878 | NM_133680.2    | HIATL1        | 0.645194065 |
| ILMN_3049650 | NM_001033525.1 | KCNK6         | 0.644461589 |
| ILMN_1229529 | NM_010476.3    | HSD17B7       | 0.644389123 |
| ILMN_2940713 | NM_001015046.2 | GARNL4        | 0.644275518 |
| ILMN_1247704 | NM_175074.1    | HMG3          | 0.644273026 |
| ILMN_1219184 | XM_289726.2    | GATS          | 0.644144164 |
| ILMN_2474596 | NM_027326.3    | MLLT3         | 0.644102242 |
| ILMN_2609394 | NM_177858.2    | 4933431E20Rik | 0.644086114 |
| ILMN_2615751 | NM_175515.4    | INTU          | 0.643819759 |
| ILMN_3161626 | NM_145401.1    | PRKAG2        | 0.643760664 |
| ILMN_1250279 | NM_009254.2    | SERPINB6A     | 0.643594492 |
| ILMN_2758662 | XM_001473299.1 | LOC100043982  | 0.643338868 |
| ILMN_1227889 | NM_146135.1    | PIAS3         | 0.643107746 |
| ILMN_2804251 | NM_025364.1    | 1110005A23RIK | 0.642868449 |
| ILMN_2731949 | NM_011803.2    | KLF6          | 0.642511412 |
| ILMN_2600078 | NM_144849.1    | ANKRD54       | 0.642192426 |
| ILMN_1248650 | NM_028375.2    | 2900027G03RIK | 0.641610314 |
| ILMN_2430704 | NM_029512.2    | TTPAL         | 0.641312076 |
| ILMN_1214465 |                | PIGM          | 0.641299791 |
| ILMN_1246107 | NM_199038.2    | CASC4         | 0.641025886 |
| ILMN_2546888 |                | SNRP70        | 0.640894463 |
| ILMN_2757150 | NM_011049.4    | PCTK1         | 0.640668973 |
| ILMN_2786125 | NM_145484.2    | ZFP758        | 0.640250386 |
| ILMN_2507232 | NM_001079876.1 | GAS2L3        | 0.640111127 |
| ILMN_1215822 | NM_029296.1    | 1700001C19RIK | 0.640062059 |
| ILMN_2627205 | NM_027230.3    | PRKCBP1       | 0.640036028 |
| ILMN_1232391 |                | 2210011G09RIK | 0.639938799 |
| ILMN_2903945 | NM_011817.1    | GADD45G       | 0.639858744 |
| ILMN_2745925 | NM_145519.1    | FARP2         | 0.63981393  |
| ILMN_2718789 | NM_020011.3    | SPHK2         | 0.639675366 |
| ILMN_1230843 | NM_011020.3    | HSPA4L        | 0.639348641 |
| ILMN_2524100 |                | ZSWIM6        | 0.639158323 |
| ILMN_2981169 | NM_008332.2    | IFIT2         | 0.639005178 |
| ILMN_2644719 | NM_026122.3    | HMG3          | 0.638728361 |
| ILMN_1220603 | NM_133836.1    | IL15RA        | 0.638251871 |
| ILMN_2646625 | NM_010591.1    | JUN           | 0.637013749 |
| ILMN_1226540 | NM_053014.3    | AGPAT3        | 0.636203938 |
| ILMN_1241764 | NM_146176.2    | CNOT3         | 0.635480361 |
| ILMN_2615879 | NM_019861.1    | CTSF          | 0.635178268 |
| ILMN_3143266 | NM_009106.1    | RTKN          | 0.635168561 |
| ILMN_2620106 |                | DHCR24        | 0.63507826  |
| ILMN_2546887 | XR_035347.1    | 2700046G09RIK | 0.634360562 |
| ILMN_1238200 | XM_001472995.1 | LOC100039496  | 0.634158238 |
| ILMN_1242159 | NM_029281.2    | ZFP820        | 0.633535304 |
| ILMN_3139354 | NM_011363.2    | SH2B1         | 0.632766924 |

|              |                |                 |             |
|--------------|----------------|-----------------|-------------|
| ILMN_2729574 | NM_001083315.1 | ST7             | 0.632279278 |
| ILMN_2777555 |                | FBXO4           | 0.632043606 |
| ILMN_1220034 | NM_008416.1    | JUNB            | 0.631660509 |
| ILMN_1249766 | NM_010262.3    | GBX2            | 0.631377133 |
| ILMN_1256624 | NM_013925.3    | ADAT1           | 0.631010633 |
| ILMN_1245437 | XM_485873.4    | SYMPK           | 0.63080606  |
| ILMN_2580825 |                | D930038O18RIK   | 0.630757812 |
| ILMN_3127066 | NM_007928.2    | MARK2           | 0.630002072 |
| ILMN_2685772 | NM_019972.2    | SORT1           | 0.629885447 |
| ILMN_1253947 |                | TRAF1           | 0.628737395 |
| ILMN_1258998 | NM_025456.3    | EAPP            | 0.628035506 |
| ILMN_1240979 | NM_019547.2    | RBM38           | 0.627862469 |
| ILMN_1258006 |                | 1700120C14RIK   | 0.626916073 |
| ILMN_1221592 | NM_025468.2    | SEC11C          | 0.626869552 |
| ILMN_2510875 | NM_013760.4    | DNAJB9          | 0.626388857 |
| ILMN_2750588 | NM_133804.2    | TMEM132A        | 0.626007267 |
| ILMN_2754596 | NM_139153.1    | CENTG3          | 0.625945895 |
| ILMN_3134607 | NM_018880.2    | TRIM3           | 0.625341404 |
| ILMN_2740890 | NM_028666.2    | FAM110A         | 0.624980073 |
| ILMN_2723826 | NM_011405.1    | SLC7A7          | 0.624924598 |
| ILMN_1255190 | NM_181344.4    | C1RL            | 0.624415456 |
| ILMN_1229977 | NM_009986.3    | CUX1            | 0.623360515 |
| ILMN_2684093 | NM_020002.2    | REC8            | 0.623047219 |
| ILMN_1253678 | XM_001471479.1 | LOC100044275    | 0.623035377 |
| ILMN_1251986 | NM_001100591.1 | RC3H2           | 0.622800656 |
| ILMN_1212997 | NM_176951.3    | XKR5            | 0.622648765 |
| ILMN_2643326 | NM_183259.2    | 2210020M01RIK   | 0.622593541 |
| ILMN_2658501 | NM_025378.2    | IFITM3          | 0.622565686 |
| ILMN_1234020 |                | SCL0002007.1_97 | 0.62248279  |
| ILMN_2824582 | NM_001039721.1 | A230107C01RIK   | 0.622004623 |
| ILMN_2432200 |                | EPB4.1          | 0.621218419 |
| ILMN_1242356 |                | 2010205O06RIK   | 0.621110481 |
| ILMN_2742636 | NM_010719.2    | LIPE            | 0.620873876 |
| ILMN_1257365 | NM_178060.2    | THRA            | 0.620604579 |
| ILMN_2718204 | NM_009131.2    | CLEC11A         | 0.620416803 |
| ILMN_2495299 | NM_175160.3    | ZDHHC1          | 0.619829249 |
| ILMN_3125181 | NM_001025589.1 | RFXANK          | 0.619820742 |
| ILMN_2957968 | NM_001024926.1 | CYB5D2          | 0.619623916 |
| ILMN_2605703 | NM_027356.2    | UFSP1           | 0.619563233 |
| ILMN_2718645 | NM_024452.2    | LUZP1           | 0.619524405 |
| ILMN_2449157 | NM_009404.3    | TNFSF9          | 0.619504696 |
| ILMN_1258148 | NM_010567.1    | INPPL1          | 0.619282531 |
| ILMN_2956095 | NM_178045.3    | RASSF4          | 0.618898471 |
| ILMN_2706014 | NM_134133.2    | 2010002N04RIK   | 0.618830438 |
| ILMN_1241811 |                | 2610029K11RIK   | 0.6186769   |
| ILMN_1231012 | NM_010696.3    | LCP2            | 0.618296819 |

|              |                |                |             |
|--------------|----------------|----------------|-------------|
| ILMN_2694446 | NM_177156.2    | A730089K16RIK  | 0.618034223 |
| ILMN_2686244 | NM_178045.3    | RASSF4         | 0.618007298 |
| ILMN_2683980 | NM_010828.2    | CITED2         | 0.617876261 |
| ILMN_2883795 | NM_178896.2    | DCUN1D4        | 0.61777081  |
| ILMN_2678336 | NM_007795.1    | CTF1           | 0.617169484 |
| ILMN_2700059 | NM_009194.2    | SLC12A2        | 0.616775788 |
| ILMN_2750047 | NM_007781.2    | CSF2RB2        | 0.616592171 |
| ILMN_2701093 | NM_146145.2    | JAK1           | 0.616551846 |
| ILMN_2605512 | NM_008484.2    | LAMB3          | 0.61594012  |
| ILMN_2980532 | NM_009370.2    | TGFBR1         | 0.615842817 |
| ILMN_1229259 | NM_026474.5    | SUGT1          | 0.615283309 |
| ILMN_1248302 | NM_133188.1    | DAZAP1         | 0.615042981 |
| ILMN_1250076 | NM_134023.1    | TBC1D10A       | 0.614690935 |
| ILMN_3155342 | NM_133717.2    | RAB43          | 0.614091778 |
| ILMN_2646166 |                | NDRL           | 0.614091515 |
| ILMN_2422042 | BC033468.1     | SCL000981.1_40 | 0.613872365 |
| ILMN_1230926 | NM_011858.3    | ODZ4           | 0.613849903 |
| ILMN_3123473 | NM_019698.1    | ALDH18A1       | 0.613679986 |
| ILMN_2721724 | NM_172624.2    | DPP9           | 0.613430966 |
| ILMN_2741063 | NM_145144.1    | 2810003C17RIK  | 0.613213945 |
| ILMN_2783852 | NM_181039.1    | LPHN1          | 0.613191665 |
| ILMN_2688912 | NM_007972.2    | F10            | 0.613184729 |
| ILMN_2607786 | NM_146094.1    | FADS1          | 0.612983785 |
| ILMN_2504294 |                | ZBPB           | 0.612791654 |
| ILMN_1240161 |                | E030040L08RIK  | 0.612753107 |
| ILMN_2435056 |                | AIPL1          | 0.612657008 |
| ILMN_2704184 |                | 5031439A09RIK  | 0.611991153 |
| ILMN_2532603 | XM_142236.4    | LOC245668      | 0.611898542 |
| ILMN_3127178 | NM_198932.2    | POU2F1         | 0.611829308 |
| ILMN_1230339 | NM_178371.3    | SLC9A8         | 0.611716059 |
| ILMN_2701534 | NM_028779.4    | AMPD2          | 0.611690971 |
| ILMN_2773113 | NM_007599.3    | CAPG           | 0.611403294 |
| ILMN_2754148 | NM_001048054.1 | DUSP16         | 0.611119029 |
| ILMN_2647694 | XM_992447.1    | E130102H24RIK  | 0.610392265 |
| ILMN_2605935 | XM_990406.1    | EG667410       | 0.610304942 |
| ILMN_2642546 | NM_177310.2    | XPNPEP3        | 0.610056629 |
| ILMN_2692399 | NM_025629.2    | ADAMTSL5       | 0.609761061 |
| ILMN_2707188 | NM_172688.2    | MAP3K7         | 0.609405187 |
| ILMN_1232849 | NM_025584.1    | 2410026K10RIK  | 0.608939795 |
| ILMN_2600753 | NM_010822.2    | MPG            | 0.608910647 |
| ILMN_2601840 | NM_028716.1    | PHF19          | 0.608379509 |
| ILMN_3112922 | NM_001077696.1 | HDAC5          | 0.608242996 |
| ILMN_2635642 | NM_198012.1    | TRIM68         | 0.608162802 |
| ILMN_2754158 | NM_011579.2    | TGTP           | 0.607849338 |
| ILMN_1218880 | NM_177323.2    | 1500019C06RIK  | 0.607649366 |
| ILMN_1225118 | XM_001473988.1 | LOC100045280   | 0.60643946  |

|              |                |                    |             |
|--------------|----------------|--------------------|-------------|
| ILMN_2507286 | NM_033622.1    | TNFSF13B           | 0.606143009 |
| ILMN_2798079 | NM_025819.2    | 1200016B10RIK      | 0.606130518 |
| ILMN_1228374 | NM_023063.1    | LIMA1              | 0.605902734 |
| ILMN_1240857 | NM_009944.3    | COX7A1             | 0.605838331 |
| ILMN_2509817 | NM_009727.2    | ATP8A1             | 0.605640415 |
| ILMN_2871628 | NM_011162.2    | MAPK8IP1           | 0.605266723 |
| ILMN_2497226 |                | C230037E05RIK      | 0.605224823 |
| ILMN_1248388 | XM_001473988.1 | LOC100045280       | 0.60504874  |
| ILMN_1240445 | NM_133774.4    | STARD4             | 0.604732666 |
| ILMN_1245043 | XM_129164.2    | LOC226017          | 0.604681967 |
| ILMN_2946119 | NM_001033175.1 | CLN6               | 0.604665103 |
| ILMN_3008238 | NM_021793.1    | TMEM8              | 0.604570271 |
| ILMN_2486012 |                | C330006P03RIK      | 0.603988526 |
| ILMN_2789294 | NM_027865.1    | TMEM25             | 0.603782077 |
| ILMN_2593230 | NM_010806.1    | MLLT4              | 0.603279184 |
| ILMN_2818895 | NM_008180.1    | GSS                | 0.603008819 |
| ILMN_2693827 | XM_001476186.1 | ATG16L2            | 0.602783284 |
| ILMN_2976250 | NM_022328.2    | MLLT1              | 0.602618494 |
| ILMN_1234533 | NM_019723.2    | SLC22A21           | 0.602541255 |
| ILMN_2499305 | NM_183355.2    | PBX1               | 0.602197969 |
| ILMN_2622374 | NM_010882.3    | NDN                | 0.602020903 |
| ILMN_2688075 | NM_020010.2    | CYP51              | 0.601697694 |
| ILMN_2604501 | NM_175526.2    | CLEC1A             | 0.601297714 |
| ILMN_2623451 | NM_026298.4    | IFT172             | 0.600443263 |
| ILMN_1248721 | NM_001042670.1 | ENSMUSG00000053178 | 0.600395639 |
| ILMN_2798993 | NM_011584.2    | NR1D2              | 0.59992949  |
| ILMN_1219193 | NM_172424.2    | THRAP2             | 0.599885834 |
| ILMN_2894587 | NM_205820.1    | TLR13              | 0.599561487 |
| ILMN_1219918 | NM_025521.3    | 2310011J03RIK      | 0.599529065 |
| ILMN_2752204 | NM_172860.1    | CBFA2T2            | 0.599463803 |
| ILMN_2744512 | NM_009275.4    | SRPRB              | 0.599237977 |
| ILMN_1238608 | NM_170680.2    | ABCC10             | 0.598973265 |
| ILMN_2879755 | NM_145968.1    | TAGAP              | 0.598800965 |
| ILMN_1246073 | NM_010094.3    | LEFTY1             | 0.598764355 |
| ILMN_2815024 | NM_016893.2    | FUT8               | 0.598541207 |
| ILMN_2596421 | NM_175018.2    | A430079E08         | 0.598299158 |
| ILMN_1229200 | XM_133096.5    | 3321401G04RIK      | 0.598260598 |
| ILMN_2686926 | NM_174852.2    | PHF12              | 0.598227784 |
| ILMN_2810331 | NM_018786.1    | PRPF40B            | 0.598049947 |
| ILMN_2476742 |                | 1110062M06RIK      | 0.597374148 |
| ILMN_1259764 |                | 1500005K14RIK      | 0.596899852 |
| ILMN_2625377 | NM_015811.1    | RGS1               | 0.596410133 |
| ILMN_2497745 | NM_001081230.1 | MTAP9              | 0.596393369 |
| ILMN_2873822 | NM_009636.1    | AEBP1              | 0.596248114 |
| ILMN_1248156 | XR_035438.1    | D830044I16RIK      | 0.596049033 |
| ILMN_2799945 | NM_019735.2    | APIP               | 0.595939407 |

|              |                |               |             |
|--------------|----------------|---------------|-------------|
| ILMN_2851023 | NM_027910.1    | KLHDC3        | 0.595935924 |
| ILMN_2807449 | NM_133924.2    | SNX21         | 0.595566712 |
| ILMN_2777668 |                | NTE           | 0.595400077 |
| ILMN_1260445 | NM_011814.2    | FXR2          | 0.595167904 |
| ILMN_3147944 | NM_001035854.2 | AP2B1         | 0.59512175  |
| ILMN_1241437 | NM_010356.3    | GSTA3         | 0.594325782 |
| ILMN_2572938 |                | D030044M21RIK | 0.594201026 |
| ILMN_2974041 | NM_013872.1    | PMM1          | 0.594121488 |
| ILMN_1241354 | NM_183020.1    | ATXN2L        | 0.593967367 |
| ILMN_1246295 | NM_133679.1    | CRYZL1        | 0.593935427 |
| ILMN_2960714 | NM_026644.1    | AGPAT4        | 0.593694541 |
| ILMN_2718791 | NM_020011.4    | SPHK2         | 0.593522231 |
| ILMN_3143078 | NM_009749.1    | BEX2          | 0.593079541 |
| ILMN_2990041 | NM_030208.1    | 2310079F23RIK | 0.593003393 |
| ILMN_2841289 | NM_009396.1    | TNFAIP2       | 0.59287828  |
| ILMN_1238058 | NM_144941.2    | MTAP7D1       | 0.592718142 |
| ILMN_2774596 | NM_010683.2    | LAMC1         | 0.592685496 |
| ILMN_2698801 | NM_001003917.3 | ATG9A         | 0.592633193 |
| ILMN_2441176 |                | SUFU          | 0.592410834 |
| ILMN_2797825 | NM_172371.1    | SLC16A13      | 0.592149609 |
| ILMN_2592449 | NM_026977.1    | 1810031K17RIK | 0.592013409 |
| ILMN_1239507 | NM_025300.2    | MRPL15        | 0.591593558 |
| ILMN_3155228 | NM_001081160.1 | MDGA1         | 0.591057139 |
| ILMN_1226099 |                | TNFSF13B      | 0.590928828 |
| ILMN_1253347 | NM_027564.3    | 4921507P07RIK | 0.59062301  |
| ILMN_2974064 | NM_027881.1    | OSBPL3        | 0.590407485 |
| ILMN_2864179 | NM_001037930.2 | MGC107702     | 0.590229694 |
| ILMN_2722389 | NM_134089.1    | SCRIB         | 0.590015907 |
| ILMN_1232668 |                | MAD           | 0.590000866 |
| ILMN_2744587 | NM_019686.3    | CIB2          | 0.58983832  |
| ILMN_2677882 | NM_198294.2    | TANC1         | 0.58922505  |
| ILMN_2858938 | NM_028711.1    | SLC25A27      | 0.589181203 |
| ILMN_2837156 | NM_027257.1    | OBFC2B        | 0.589091683 |
| ILMN_2630772 | NM_177919.1    | TCEAL5        | 0.588365637 |
| ILMN_2463033 |                | 2700050C19RIK | 0.588176929 |
| ILMN_2656854 | NM_001039546.1 | MYO6          | 0.588118685 |
| ILMN_2942276 | NM_024452.2    | LUZP1         | 0.58782907  |
| ILMN_2707227 | NM_027853.2    | METTL7B       | 0.587771036 |
| ILMN_2941992 | NM_011183.1    | PSEN2         | 0.587302219 |
| ILMN_1238310 | NM_001033458.2 | GM1673        | 0.587174089 |
| ILMN_2754167 | XM_359282.1    | H2-Q7         | 0.586961678 |
| ILMN_2661666 | NM_018783.3    | TFIP11        | 0.586863617 |
| ILMN_2462151 |                | DGKQ          | 0.586459066 |
| ILMN_2648486 | NM_001033164.2 | 2510002D24RIK | 0.585260635 |
| ILMN_1242093 |                | A230005G17RIK | 0.585152481 |
| ILMN_2803344 | NM_144801.1    | TMEM143       | 0.584876648 |

|              |                |               |             |
|--------------|----------------|---------------|-------------|
| ILMN_2775300 | NM_183137.2    | 2410002I01RIK | 0.584707868 |
| ILMN_1219459 | NM_178623.3    | 2010005J08RIK | 0.584234774 |
| ILMN_2953017 | NM_001005507.1 | SMG7          | 0.584124721 |
| ILMN_2725082 | NM_172783.1    | PHKA2         | 0.58408135  |
| ILMN_2754233 | NM_197943.2    | SGSM2         | 0.583799266 |
| ILMN_2633148 | NM_028121.1    | ADPGK         | 0.583738391 |
| ILMN_2638520 | XM_484616.4    | RAB11FIP3     | 0.583406673 |
| ILMN_2665035 | NM_134161.2    | FUT10         | 0.583276452 |
| ILMN_1214517 | NM_183254.1    | 1700025K23RIK | 0.583009027 |
| ILMN_2695035 | NM_144859.2    | PJA2          | 0.582646163 |
| ILMN_1242571 | NM_153805.1    | PKN3          | 0.582465444 |
| ILMN_2593241 | NM_010790.2    | MELK          | 0.581900877 |
| ILMN_2981792 | NM_008992.1    | ABCD4         | 0.581810874 |
| ILMN_1236312 | NM_172926.2    | SNX14         | 0.581136903 |
| ILMN_1241077 | NM_010459.6    | HOXB4         | 0.581052503 |
| ILMN_1228850 | NM_019937.3    | CCNL1         | 0.580905998 |
| ILMN_1244594 |                | MVK           | 0.580646408 |
| ILMN_2618221 | NM_011366.2    | SORBS3        | 0.580073748 |
| ILMN_1247765 | NM_001081279.1 | MFHAS1        | 0.580070998 |
| ILMN_3122383 | NM_001025613.1 | OTUD7B        | 0.579989523 |
| ILMN_3143651 | NM_001081083.1 | ARMC3         | 0.579891714 |
| ILMN_3160592 | NM_001004178.1 | AA415398      | 0.579742967 |
| ILMN_1254547 | NM_013613.1    | NR4A2         | 0.579599981 |
| ILMN_1249759 | NM_133836.1    | IL15RA        | 0.579502735 |
| ILMN_1237017 | NM_011678.1    | USP4          | 0.579237586 |
| ILMN_3162407 | NM_011756.4    | ZFP36         | 0.579153339 |
| ILMN_1228629 | NM_133218.1    | ZFP704        | 0.578857241 |
| ILMN_2455904 | XM_895387.2    | 2210408F21RIK | 0.578621128 |
| ILMN_2987709 | NM_023044.1    | SLC15A3       | 0.578611471 |
| ILMN_2672543 | NM_207202.2    | CCDC120       | 0.578572867 |
| ILMN_2437792 | NM_001081344.1 | STXBP5        | 0.578560037 |
| ILMN_2599392 | NM_176987.3    | 4732471D19RIK | 0.578352917 |
| ILMN_2814350 | NM_021527.1    | MKKS          | 0.578120347 |
| ILMN_1253544 |                | 2900060B14RIK | 0.576907311 |
| ILMN_2856095 | NM_153159.1    | ZC3H12A       | 0.576894242 |
| ILMN_2449019 | NM_016788.2    | TNK2          | 0.576782321 |
| ILMN_2770429 |                | PLOD2         | 0.576470065 |
| ILMN_2916791 | NM_172941.2    | ZKSCAN17      | 0.576343713 |
| ILMN_1230413 | NM_017382.4    | RAB11A        | 0.576194224 |
| ILMN_1245733 | NM_001024922.2 | DDX49         | 0.576062999 |
| ILMN_3138057 | NM_183172.1    | RIC8B         | 0.575869078 |
| ILMN_2868459 | NM_172528.2    | LRRC1         | 0.575657585 |
| ILMN_2874816 | NM_172587.2    | CDC14B        | 0.575103057 |
| ILMN_2599130 | NM_007438.3    | ALDOA         | 0.575101625 |
| ILMN_1244584 | NM_173392.3    | ZFYVE16       | 0.575052819 |
| ILMN_3144575 | NM_133663.2    | ITGB4         | 0.574822386 |

|              |                |               |             |
|--------------|----------------|---------------|-------------|
| ILMN_2741383 | NM_147155.2    | TAGAP1        | 0.574666056 |
| ILMN_2429059 | NM_001085416.1 | ZFP467        | 0.574539952 |
| ILMN_1248367 | NM_172961.2    | ABAT          | 0.574336538 |
| ILMN_2694329 | NM_138646.2    | HPS4          | 0.573680809 |
| ILMN_2970834 | NM_023041.2    | PEX19         | 0.573327508 |
| ILMN_1245529 | NM_008793.1    | PCSK4         | 0.572888093 |
| ILMN_2592507 | NM_172261.2    | PPP1R9B       | 0.57265034  |
| ILMN_2685985 | XM_194337.7    | MEGF8         | 0.572450007 |
| ILMN_2685890 | NM_177138.2    | 6720469N11RIK | 0.57216765  |
| ILMN_2927373 | NM_007837.2    | DDIT3         | 0.571839211 |
| ILMN_2441303 |                | 8430438L13RIK | 0.57154806  |
| ILMN_1254655 | NM_007609.1    | CASP4         | 0.571534468 |
| ILMN_2905859 | NM_019750.2    | NAT6          | 0.571422549 |
| ILMN_2700425 | NM_015805.2    | ATP9B         | 0.571257358 |
| ILMN_2632489 | NM_133710.1    | CTDSP1        | 0.571188916 |
| ILMN_2848473 | NM_001045524.1 | AK129341      | 0.570761848 |
| ILMN_2620089 | NM_153796.3    | PEO1          | 0.570699131 |
| ILMN_2990152 | NM_027539.3    | DCLK2         | 0.570632493 |
| ILMN_2632230 | NM_145528.2    | D2ERTD391E    | 0.570157963 |
| ILMN_2900854 | NM_178061.4    | MOBK12B       | 0.56927587  |
| ILMN_2461707 | NM_001039080.1 | RBMS2         | 0.568664357 |
| ILMN_2694842 | NM_178932.1    | AOC2          | 0.568037752 |
| ILMN_2687071 | NM_026097.2    | RFFL          | 0.567995743 |
| ILMN_3140516 | NM_001039086.1 | RAPGEF1       | 0.567727998 |
| ILMN_2621921 | NM_011930.3    | CLCN7         | 0.567459485 |
| ILMN_1214991 | NM_153545.1    | LRRC45        | 0.567428816 |
| ILMN_2601670 | NM_178236.3    | ASB7          | 0.566862791 |
| ILMN_1219682 | NM_207225.1    | HDAC4         | 0.566817048 |
| ILMN_1234901 | NM_024208.4    | ECHDC3        | 0.566723087 |
| ILMN_1228060 | NM_001081374.1 | PRSS36        | 0.566707186 |
| ILMN_2715802 | NM_016660.2    | HMGA1         | 0.566227964 |
| ILMN_1248354 | XM_140320.7    | CCDC112       | 0.566000348 |
| ILMN_2676181 | NM_022432.3    | SIRT2         | 0.565980927 |
| ILMN_2496455 | NM_001044698.1 | ZFP2          | 0.565337338 |
| ILMN_1254154 | NM_020027.2    | BAT2          | 0.565200561 |
| ILMN_2626585 | NM_010588.2    | JAG2          | 0.564614753 |
| ILMN_2578789 |                | D030010H02RIK | 0.56448387  |
| ILMN_2621581 | NM_013870.2    | SMTN          | 0.564479299 |
| ILMN_2995370 | NM_001009927.1 | SMCR7         | 0.564306796 |
| ILMN_2448599 | XM_001474014.1 | LOC100040061  | 0.564229963 |
| ILMN_2738548 | XM_134478.2    | 2010007L18RIK | 0.564128463 |
| ILMN_2874414 | NM_027804.2    | USP19         | 0.563842032 |
| ILMN_2665715 | NM_133994.3    | GSTT3         | 0.563774899 |
| ILMN_2645090 | NM_153091.2    | ST7L          | 0.563453598 |
| ILMN_2721982 | NM_172472.2    | TCFE3         | 0.563366703 |
| ILMN_2659160 | NM_001077696.1 | HDAC5         | 0.563320152 |



|              |                |                   |             |
|--------------|----------------|-------------------|-------------|
| ILMN_2551902 |                | 2210039O17RIK     | 0.563220775 |
| ILMN_2929966 | NM_133893.1    | OAS1D             | 0.56286477  |
| ILMN_2569706 |                | D230021E06RIK     | 0.56249295  |
| ILMN_1232707 |                | SAMHD1            | 0.562311666 |
| ILMN_1231405 | NM_011986.2    | NCDN              | 0.562149952 |
| ILMN_1252308 | NM_182999.1    | RNF20             | 0.561978748 |
| ILMN_2938904 | NM_026619.1    | GSTO2             | 0.561975686 |
| ILMN_1233120 | XM_920730.2    | 1700112E06RIK     | 0.561896668 |
| ILMN_2657800 | NM_007772.1    | HIVEP1            | 0.561608604 |
| ILMN_2887104 | NM_175181.3    | 2600010E01RIK     | 0.561508742 |
| ILMN_2712280 | NM_025661.3    | ORMDL3            | 0.561318523 |
| ILMN_2705802 | NM_016916.3    | BLCAP             | 0.561298266 |
| ILMN_1256463 | NM_145586.1    | TMEM159           | 0.561017734 |
| ILMN_1222036 | NM_027995.2    | PAQR7             | 0.560357035 |
| ILMN_1254644 | NM_013539.1    | SPSB2             | 0.560271717 |
| ILMN_2864062 | NM_009504.2    | VDR               | 0.560004417 |
| ILMN_3144164 | NM_001081212.1 | IRS2              | 0.559910348 |
| ILMN_3094506 | NM_177566.3    | ARHGEF15          | 0.559856679 |
| ILMN_1216552 | NM_175484.3    | CORO2B            | 0.559543379 |
| ILMN_2967455 | NM_011625.1    | PPP1R13B          | 0.559288667 |
| ILMN_2879745 | NM_010688.2    | LASP1             | 0.559252192 |
| ILMN_1246998 |                | 3110001A05RIK     | 0.558831271 |
| ILMN_2957944 | NM_178898.2    | AI894139          | 0.558711055 |
| ILMN_1254000 | NM_019586.3    | UBE2J1            | 0.558344496 |
| ILMN_1241720 |                | 9430081H08RIK     | 0.558258534 |
| ILMN_2547313 |                | RXRB              | 0.558080395 |
| ILMN_2424268 | NM_207212.2    | WTIP              | 0.557521481 |
| ILMN_2958207 | NM_010941.3    | NSDHL             | 0.557384646 |
| ILMN_2607297 | NM_028369.2    | MON1A             | 0.557229071 |
| ILMN_2653617 | NM_007653.1    | CD63              | 0.557165008 |
| ILMN_3162516 | NM_001037932.1 | OTTMUSG0000000099 | 0.557138117 |
| ILMN_2713969 | NM_013717.2    | B9D1              | 0.556608186 |
| ILMN_2423196 |                | 9230112E08RIK     | 0.556518189 |
| ILMN_1230304 | XR_030976.1    | LOC100044774      | 0.556331935 |
| ILMN_2914453 | NM_144920.3    | PLEKHA5           | 0.556215371 |
| ILMN_2668778 | NM_029768.3    | USE1              | 0.556210919 |
| ILMN_2860750 | NM_025665.1    | 2610209M04RIK     | 0.556055135 |
| ILMN_2612754 | NM_177662.2    | CTSO              | 0.555809628 |
| ILMN_1258931 | NM_016699.1    | EXOSC10           | 0.555690843 |
| ILMN_2725083 | NM_172783.2    | PHKA2             | 0.555590741 |
| ILMN_2665131 | NM_013785.2    | IHPK1             | 0.555389044 |
| ILMN_3132660 | NM_011244.3    | RARG              | 0.55529513  |
| ILMN_2727299 | XM_001474974.1 | WDR25             | 0.555037615 |
| ILMN_2525382 | NM_001033175.2 | CLN6              | 0.554942669 |
| ILMN_1220861 | NM_001042487.1 | DLGAP4            | 0.554926334 |
| ILMN_2683244 | NM_001081322.1 | MYO5C             | 0.554910638 |

|              |                |               |             |
|--------------|----------------|---------------|-------------|
| ILMN_1247614 | NM_173745.4    | DUSP18        | 0.554619465 |
| ILMN_2736153 | NM_022012.3    | MAP3K11       | 0.554423373 |
| ILMN_2551437 | XM_001474132.1 | LOC625175     | 0.554358376 |
| ILMN_2654952 | XM_001475189.1 | LOC100040592  | 0.5542225   |
| ILMN_2750578 | NM_177594.1    | MTMR9         | 0.553846069 |
| ILMN_2705570 | NM_025964.3    | FAM119A       | 0.553491117 |
| ILMN_2593338 | NM_025914.2    | ACTR6         | 0.553124993 |
| ILMN_2441811 | NM_177758.3    | ZSCAN20       | 0.552310389 |
| ILMN_2878781 | NM_134189.2    | GALNT10       | 0.552054768 |
| ILMN_1218605 |                | NFKBIA        | 0.551912221 |
| ILMN_2841328 | NM_146216.2    | VAC14         | 0.551606563 |
| ILMN_1227666 | NM_009948.1    | CPT1B         | 0.551455934 |
| ILMN_2642133 | NM_011379.3    | SIPA1         | 0.551357555 |
| ILMN_2765741 | NM_001008543.2 | MXI1          | 0.551135854 |
| ILMN_2945835 | NM_007523.2    | BAK1          | 0.55104235  |
| ILMN_1231096 |                | 2310036D22RIK | 0.551010393 |
| ILMN_2764549 | NM_172758.3    | BC031853      | 0.550723185 |
| ILMN_3160783 | NM_001014974.1 | TTLL4         | 0.549970492 |
| ILMN_2603081 | NM_026004.2    | NT5C3         | 0.549772624 |
| ILMN_2652085 | NM_026075.2    | SFRS12IP1     | 0.549340429 |
| ILMN_2810624 | NM_144942.1    | CSAD          | 0.548980809 |
| ILMN_2729771 | NM_001039521.1 | RRN3          | 0.548972751 |
| ILMN_1215644 | XR_032896.1    | LOC100047634  | 0.548828708 |
| ILMN_1251301 | NM_029091.2    | KLC4          | 0.548749724 |
| ILMN_2831768 | NM_177709.2    | TUSC5         | 0.548585166 |
| ILMN_2666582 | NM_013610.1    | NINJ1         | 0.548217107 |
| ILMN_2833152 | NM_026739.1    | 9530077C05RIK | 0.548186578 |
| ILMN_2740159 | NM_025970.3    | ZBTB8OS       | 0.548110907 |
| ILMN_2755585 | NM_027106.3    | AVPI1         | 0.54773196  |
| ILMN_1230444 | NM_134105.2    | TXNDC11       | 0.547616071 |
| ILMN_2685769 | XM_127132.3    | AW555464      | 0.547240704 |
| ILMN_2682271 | NM_021550.2    | C1GALT1C1     | 0.547055494 |
| ILMN_2736566 | NM_178919.3    | LMF2          | 0.546836552 |
| ILMN_2917338 | NM_026301.1    | RNF125        | 0.546831225 |
| ILMN_1236899 |                | A830087P12RIK | 0.546678429 |
| ILMN_2494251 | NM_011653.2    | TUBA1A        | 0.546546036 |
| ILMN_2860281 | NM_001024708.1 | LOC436177     | 0.546040137 |
| ILMN_2673268 | XM_128715.5    | E130307D12    | 0.545985502 |
| ILMN_2598622 | XM_129596.2    | SLAMF8        | 0.545948924 |
| ILMN_1236535 | XM_356006.1    | LOC381971     | 0.545447523 |
| ILMN_2561993 |                | A130039H09RIK | 0.545329628 |
| ILMN_1255657 | NM_026417.3    | YIPF4         | 0.545220166 |
| ILMN_1234336 | NM_139117.2    | CSDA          | 0.545089375 |
| ILMN_2525513 | NM_008363.2    | IRAK1         | 0.545037433 |
| ILMN_2637953 | NM_008874.2    | PLCB3         | 0.544859272 |
| ILMN_2452717 |                | 2610019E17RIK | 0.544795784 |

|              |                |               |             |
|--------------|----------------|---------------|-------------|
| ILMN_1248843 | NM_008091.2    | GATA3         | 0.544573329 |
| ILMN_2699367 | NM_197988.1    | 1190005I06RIK | 0.544374069 |
| ILMN_1247245 | NM_030252.2    | BC003266      | 0.544346865 |
| ILMN_1248994 | XM_001004724.2 | 4933407C03RIK | 0.544139576 |
| ILMN_2417430 |                | 1810044D09RIK | 0.54413263  |
| ILMN_2628757 | NM_010119.5    | EHD1          | 0.543809261 |
| ILMN_3115281 | NM_001042534.1 | CAPG          | 0.543768766 |
| ILMN_2834696 | NM_009222.2    | SNAP23        | 0.543097555 |
| ILMN_1228762 | NM_010091.2    | DVL1          | 0.542544679 |
| ILMN_2698430 | NM_009743.4    | BCL2L1        | 0.542250726 |
| ILMN_2845391 | NM_026366.1    | N6AMT1        | 0.54217192  |
| ILMN_2509644 | NM_013861.3    | TPK1          | 0.542040147 |
| ILMN_1257817 | NM_028387.1    | MACROD2       | 0.541711946 |
| ILMN_2775220 | NM_029338.3    | 1700027N10RIK | 0.54167012  |
| ILMN_2690575 | NM_025273.2    | PCBD1         | 0.541665067 |
| ILMN_1218843 | NM_025296.2    | CIAO1         | 0.541618794 |
| ILMN_1231513 | NM_020047.3    | TACSTD2       | 0.541175259 |
| ILMN_3059135 | NM_001081118.1 | PHRF1         | 0.540692507 |
| ILMN_2988480 | NM_021301.1    | SLC15A2       | 0.540662464 |
| ILMN_2963223 | NM_024436.1    | RAB22A        | 0.540333645 |
| ILMN_2519425 | XM_903408.3    | LOC630284     | 0.540314998 |
| ILMN_1252105 | NM_027480.2    | ANKRD24       | 0.54029424  |
| ILMN_2920753 | NM_008488.1    | ARHGEF1       | 0.540144844 |
| ILMN_2646504 |                | NPAT          | 0.540092658 |
| ILMN_3131887 | NM_001025430.1 | SPAG9         | 0.539760462 |
| ILMN_3130055 | NM_153088.1    | CTDSP1        | 0.539533391 |
| ILMN_3156529 | NM_178371.3    | SLC9A8        | 0.539490122 |
| ILMN_2694857 | NM_172876.2    | GPATCH3       | 0.539457376 |
| ILMN_3054840 | NM_201361.1    | AW061290      | 0.53932797  |
| ILMN_2564539 |                | SCLY          | 0.539181925 |
| ILMN_2768482 | NM_029920.5    | C130038G02RIK | 0.539180851 |
| ILMN_2560197 |                | 9530014D17RIK | 0.538849667 |
| ILMN_2755511 | XM_001481316.1 | BC039210      | 0.538557703 |
| ILMN_3159387 | NM_145941.2    | EIF4G1        | 0.538405411 |
| ILMN_2751354 | NM_178080.4    | PDE4DIP       | 0.538021292 |
| ILMN_2756891 | NM_207206.1    | LPCAT4        | 0.537988106 |
| ILMN_2907370 | NM_181848.3    | OPTN          | 0.537935745 |
| ILMN_3129497 | NM_001039387.1 | NELF          | 0.537742669 |
| ILMN_2724570 | NM_013871.2    | MAPK12        | 0.537572367 |
| ILMN_2721919 | NM_146202.1    | ZFP768        | 0.53754782  |
| ILMN_2605756 | NM_008450.2    | KLC1          | 0.537493418 |
| ILMN_2639360 | NM_144852.3    | SLC7A4        | 0.537450162 |
| ILMN_3082031 | NM_001008795.1 | WHRN          | 0.537313319 |
| ILMN_2674234 | NM_027777.1    | PEX1          | 0.537285817 |
| ILMN_2697361 | NM_172477.3    | DENND2A       | 0.537265353 |
| ILMN_2953351 | NM_026295.2    | CTDP1         | 0.537117307 |

|              |                |               |             |
|--------------|----------------|---------------|-------------|
| ILMN_2762189 | NM_026181.1    | GPATCH1       | 0.537068884 |
| ILMN_3040617 | NM_001080935.1 | B230217C12RIK | 0.536925982 |
| ILMN_2630182 | NM_009305.1    | SYP           | 0.536281647 |
| ILMN_1225235 | NM_054081.2    | MTA1          | 0.536083433 |
| ILMN_3163159 | XM_001477173.1 | LOC100041703  | 0.535876751 |
| ILMN_1239662 | NM_009207.2    | SLC4A2        | 0.535835041 |
| ILMN_1212645 | NM_144512.2    | SLC6A13       | 0.535562815 |
| ILMN_1226785 | NM_152134.1    | HOMER1        | 0.535118691 |
| ILMN_2781153 | NM_021791.2    | DOC2G         | 0.535040914 |
| ILMN_1223340 | NM_001098837.1 | ATXN7L3       | 0.534908984 |
| ILMN_2650893 | NM_007893.3    | E4F1          | 0.53476925  |
| ILMN_1226268 | NM_016863.2    | FKBP1B        | 0.534747001 |
| ILMN_1249466 | NM_001012517.4 | FUT10         | 0.53463724  |
| ILMN_3096267 | NM_001038593.1 | GLRX2         | 0.534586849 |
| ILMN_1257163 | NM_001081260.1 | TNKS1BP1      | 0.534573446 |
| ILMN_2608746 | NM_008520.2    | LTBP3         | 0.534364412 |
| ILMN_3145782 | NM_011765.4    | ZFP97         | 0.534350832 |
| ILMN_1219581 |                | B230369F24RIK | 0.534186523 |
| ILMN_2776619 | NM_008520.2    | LTBP3         | 0.534164125 |
| ILMN_3023451 | NM_001013808.1 | LOC433801     | 0.534133201 |
| ILMN_2848273 | NM_026345.2    | MANSC1        | 0.533934378 |
| ILMN_2668849 | NM_027230.3    | PRKCBP1       | 0.533773272 |
| ILMN_2752371 | NM_172471.2    | ITIH5         | 0.533738128 |
| ILMN_2942930 | NM_053180.2    | CCRK          | 0.533712435 |
| ILMN_2932455 | NM_008771.2    | P2RX1         | 0.533195727 |
| ILMN_2804091 | NM_133832.2    | RDH10         | 0.533036542 |
| ILMN_2794825 | NM_153083.2    | THTPA         | 0.532829464 |
| ILMN_2741464 | NM_172731.1    | FGD5          | 0.532722007 |
| ILMN_3114377 | NM_001003963.1 | DNMT3B        | 0.53272021  |
| ILMN_2841710 | NM_172685.1    | SLC25A24      | 0.532557463 |
| ILMN_2685055 | NM_026054.2    | 2810474O19RIK | 0.532491441 |
| ILMN_2851671 | NM_016969.1    | MYADM         | 0.532414741 |
| ILMN_2746664 | NM_021551.3    | SLC22A17      | 0.532073944 |
| ILMN_1245472 | NM_007423.3    | AFP           | 0.532069691 |
| ILMN_1259701 |                | 0710001D07RIK | 0.532040053 |
| ILMN_3003242 | NM_008622.1    | MPV17         | 0.531978561 |
| ILMN_1233665 |                | 2610019N19RIK | 0.531943093 |
| ILMN_2647028 | NM_019877.2    | COPZ2         | 0.531840994 |
| ILMN_3151510 | NM_001038625.1 | SERTAD2       | 0.531826419 |
| ILMN_2637538 | NM_028207.2    | DUSP3         | 0.5314224   |
| ILMN_2620799 |                | A930010I20RIK | 0.531203864 |
| ILMN_1249441 | NM_025876.2    | CDK5RAP1      | 0.53078677  |
| ILMN_2789208 | NM_023764.2    | TOLLIP        | 0.530575821 |
| ILMN_1237849 |                | C630015B10RIK | 0.529987802 |
| ILMN_1258349 | NM_001039494.2 | 1700019N12RIK | 0.529173481 |
| ILMN_1227976 |                | E430031D18RIK | 0.528892606 |

|              |                |               |             |
|--------------|----------------|---------------|-------------|
| ILMN_2658153 | NM_153160.2    | ZCCHC17       | 0.528610076 |
| ILMN_2461582 | XM_888335.2    | 4732460K03RIK | 0.52855414  |
| ILMN_2901056 | NM_145147.2    | GTPBP6        | 0.527895569 |
| ILMN_2932660 | NM_022418.1    | TMUB1         | 0.527878698 |
| ILMN_1242399 | NM_023422.3    | HIST1H2BC     | 0.527535685 |
| ILMN_1218891 | NM_023480.2    | FAHD1         | 0.526332444 |
| ILMN_2854593 | NM_028141.2    | ZFP661        | 0.526276908 |
| ILMN_1246192 | XM_133827.2    | MAZ           | 0.526264979 |
| ILMN_2417863 | NM_021327.1    | TNIP1         | 0.526254584 |
| ILMN_2830983 | NM_144872.1    | EML3          | 0.526000081 |
| ILMN_2604282 | NM_013834.1    | SFRP1         | 0.525721936 |
| ILMN_1252524 | NM_001081684.1 | ZFP295        | 0.525150581 |
| ILMN_2656021 | NM_027881.2    | OSBPL3        | 0.525067661 |
| ILMN_1222060 | XM_915627.3    | ARHGEF5       | 0.524944726 |
| ILMN_1218384 | NM_026756.2    | NFIC          | 0.524842836 |
| ILMN_1249462 | NM_025978.3    | TTC14         | 0.524641645 |
| ILMN_2581860 |                | 2410008A19RIK | 0.524339647 |
| ILMN_2734181 | NM_019811.3    | ACSS2         | 0.524118345 |
| ILMN_2955671 | NM_175121.3    | SLC38A2       | 0.524110923 |
| ILMN_1243330 |                | BC059177      | 0.523746935 |
| ILMN_3162081 | NM_031392.2    | WDR6          | 0.523597423 |
| ILMN_1230788 | NM_011599.3    | TLE1          | 0.523424781 |
| ILMN_2951955 | NM_175126.3    | ZCCHC3        | 0.523292001 |
| ILMN_1249428 | NM_010744.3    | TMED1         | 0.523141718 |
| ILMN_2707017 | NM_144520.2    | SEC14L2       | 0.523090337 |
| ILMN_2944939 | NM_133926.2    | CAMK1         | 0.522942717 |
| ILMN_1223895 | NM_198425.2    | EID2          | 0.522923411 |
| ILMN_2842767 | NM_025788.2    | NACC1         | 0.522918076 |
| ILMN_3117134 | NM_001025605.1 | GM527         | 0.522823896 |
| ILMN_2947031 | NM_029702.2    | ARFRP1        | 0.522812036 |
| ILMN_1236445 |                | 9130227N12RIK | 0.522557869 |
| ILMN_1256299 | NM_173442.2    | GCNT1         | 0.522313263 |
| ILMN_2663211 | NM_175096.3    | STBD1         | 0.522208856 |
| ILMN_2740652 | NM_153571.1    | HSCB          | 0.522074013 |
| ILMN_2719924 | NM_029841.2    | 2510039O18RIK | 0.521572967 |
| ILMN_2935579 | NM_011912.1    | VAX2          | 0.521552017 |
| ILMN_1213836 | NM_008530.2    | LY6F          | 0.52153819  |
| ILMN_1252019 | NM_023370.1    | CDH23         | 0.521484145 |
| ILMN_2645071 | NM_022029.2    | NRGN          | 0.521475709 |
| ILMN_2741006 | NM_172615.3    | 1700021K19RIK | 0.521198563 |
| ILMN_1253414 | NM_010419.2    | HES5          | 0.521139239 |
| ILMN_1225602 | NM_011309.3    | S100A1        | 0.520887671 |
| ILMN_2522542 | NM_001081237.1 | KLHDC5        | 0.520539406 |
| ILMN_2977240 | NM_134135.1    | SLC39A3       | 0.520454797 |
| ILMN_2627013 | NM_175433.4    | ZFP710        | 0.520346439 |
| ILMN_2805631 | NM_028479.1    | 1600027N09RIK | 0.520040913 |

|              |                |               |             |
|--------------|----------------|---------------|-------------|
| ILMN_1216970 | NM_027882.2    | CIC           | 0.519833835 |
| ILMN_2509273 | NM_172541.2    | TMEM120A      | 0.51980149  |
| ILMN_2435612 | NM_019574.2    | PATZ1         | 0.519721883 |
| ILMN_3135640 | NM_001004293.1 | AMIGO1        | 0.519445945 |
| ILMN_2699522 | NM_145508.2    | DYRK3         | 0.519420199 |
| ILMN_1238237 | NM_053084.1    | TRIM32        | 0.519401357 |
| ILMN_2632187 | NM_029581.3    | MTIF3         | 0.51939141  |
| ILMN_2701339 | NM_022423.1    | 2410016F01RIK | 0.519335125 |
| ILMN_2942883 | NM_175331.3    | NT5DC3        | 0.519053692 |
| ILMN_3107156 | NM_013469.1    | ANXA11        | 0.518783773 |
| ILMN_2946672 | NM_029809.1    | 2310014L17RIK | 0.51869071  |
| ILMN_2761169 | NM_173181.1    | 3110050N22RIK | 0.518685811 |
| ILMN_1259100 | NM_133209.1    | PILRB1        | 0.518507104 |
| ILMN_2666312 | NM_145987.2    | TMEM82        | 0.518351736 |
| ILMN_2829262 | NM_175641.1    | LTBP4         | 0.518280958 |
| ILMN_2591056 | NM_199026.1    | PIGL          | 0.518225723 |
| ILMN_1238440 |                | C130020P08RIK | 0.51807354  |
| ILMN_2851576 | NM_019418.1    | TNFSF14       | 0.517800236 |
| ILMN_2677157 | NM_018787.1    | NPFF          | 0.517694607 |
| ILMN_2426249 | XM_001474445.1 | LOC100045522  | 0.517660335 |
| ILMN_2759762 | NM_019990.4    | STARD10       | 0.51732211  |
| ILMN_2686407 | NM_145586.1    | TMEM159       | 0.517223374 |
| ILMN_2630018 | NM_018810.2    | MKRN1         | 0.517097496 |
| ILMN_2630344 | NM_007949.4    | ERCC2         | 0.516856465 |
| ILMN_2636349 | NM_176834.2    | RNF208        | 0.516845252 |
| ILMN_3000465 | NM_211355.1    | SMEK1         | 0.516432942 |
| ILMN_2516710 |                | A130028J20RIK | 0.516413696 |
| ILMN_2642313 | NM_011813.2    | FIZ1          | 0.516391168 |
| ILMN_2703204 | NM_026844.3    | 2310061C15RIK | 0.516174115 |
| ILMN_2722290 | NM_198417.1    | C030039L03RIK | 0.516003937 |
| ILMN_2996732 | NM_026721.1    | SLC39A13      | 0.515922443 |
| ILMN_2939303 | NM_024229.2    | PCYT2         | 0.515670581 |
| ILMN_1244249 |                | E030050A11RIK | 0.515668018 |
| ILMN_2925008 | NM_145512.2    | SFT2D2        | 0.515650351 |
| ILMN_2743155 | NM_134087.1    | AA409316      | 0.515643375 |
| ILMN_2481125 | NM_009553.2    | ZSCAN2        | 0.515623411 |
| ILMN_2805624 | NM_207232.1    | PTPDC1        | 0.515570235 |
| ILMN_1222365 |                | 2610200O14RIK | 0.515427524 |
| ILMN_2709179 | NM_026189.2    | 2310005P05RIK | 0.515308182 |
| ILMN_2668189 | NM_001081366.1 | VPS8          | 0.515037455 |
| ILMN_2739295 | NM_026179.2    | ABHD5         | 0.515029503 |
| ILMN_1216732 | NM_008562.3    | MCL1          | 0.514988685 |
| ILMN_2641632 | NM_181666.1    | FUK           | 0.514947171 |
| ILMN_1234250 |                | AKL3L-PENDING | 0.514895101 |
| ILMN_2746132 | NM_153118.1    | FNBP1L        | 0.514865957 |
| ILMN_2477221 | NM_010828.2    | CITED2        | 0.514493594 |

|              |                |               |             |
|--------------|----------------|---------------|-------------|
| ILMN_1259226 | NM_172693.3    | GALNT12       | 0.51447333  |
| ILMN_2977390 | NM_001039244.1 | EG633640      | 0.514408032 |
| ILMN_1241695 | NM_026835.2    | MS4A6D        | 0.514373756 |
| ILMN_2660803 | NM_199195.1    | BCKDHB        | 0.514167826 |
| ILMN_2628281 | NM_016717.3    | SCLY          | 0.513709608 |
| ILMN_2661340 | NM_148933.1    | SLCO4A1       | 0.51355072  |
| ILMN_2837100 | NM_001024841.2 | GM128         | 0.513378896 |
| ILMN_2867241 | NM_173006.1    | PON3          | 0.512289595 |
| ILMN_2954881 | NM_016921.2    | TCIRG1        | 0.512207706 |
| ILMN_1239238 | NM_008856.3    | PRKCH         | 0.512156919 |
| ILMN_1214239 | NM_001025373.1 | 4930432O21RIK | 0.51171414  |
| ILMN_2637165 |                | 2310001H17RIK | 0.511064055 |
| ILMN_2876448 | NM_008598.2    | MGMT          | 0.510834383 |
| ILMN_2977404 | NM_021883.1    | TMOD1         | 0.5107828   |
| ILMN_2792089 | NM_011480.1    | SREBF1        | 0.510537922 |
| ILMN_1213824 | XM_001473420.1 | LOC100039742  | 0.51041537  |
| ILMN_2780519 | NM_153091.2    | ST7L          | 0.510204768 |
| ILMN_1247636 | NM_029561.3    | NDFIP2        | 0.510109864 |
| ILMN_1256718 | NM_001033484.1 | IQGAP3        | 0.51010236  |
| ILMN_1256594 | NM_009900.1    | CLCN2         | 0.510050349 |
| ILMN_2705349 | NM_153578.2    | NIPA1         | 0.509905576 |
| ILMN_2598877 | NM_016972.2    | SLC7A8        | 0.509467882 |
| ILMN_2702868 | NM_133913.1    | 2010209O12RIK | 0.508963708 |
| ILMN_1252110 | NM_021899.2    | FOXJ2         | 0.508897751 |
| ILMN_2445324 | XM_001478602.1 | LOC100047651  | 0.508798697 |
| ILMN_3154457 | NM_144859.2    | PJA2          | 0.508695323 |
| ILMN_1242054 | NM_007525.2    | BARD1         | 0.508675922 |
| ILMN_2942573 | NM_018771.3    | GIPC1         | 0.508630566 |
| ILMN_2668178 | NM_175474.3    | FAM109A       | 0.508618243 |
| ILMN_3060538 | NM_001015681.1 | E130308A19RIK | 0.508582739 |
| ILMN_2728107 | NM_183172.1    | RIC8B         | 0.508467618 |
| ILMN_2676172 | NM_030260.2    | ZXDC          | 0.508330323 |
| ILMN_1237951 | NM_182696.2    | GGN           | 0.508044788 |
| ILMN_1221703 | NM_013850.1    | ABCA7         | 0.507671866 |
| ILMN_1227024 | XR_034455.1    | LOC100048372  | 0.507591622 |
| ILMN_1258159 | NM_011400.2    | SLC2A1        | 0.507443651 |
| ILMN_1243591 | NM_025739.2    | RNF220        | 0.507202222 |
| ILMN_1226653 | NM_001013414.1 | 0610025P10RIK | 0.507116719 |
| ILMN_1246018 | NM_145479.3    | KLHL22        | 0.507056737 |
| ILMN_2651462 | NM_027877.2    | MUS81         | 0.506863886 |
| ILMN_1224076 | NM_026050.1    | 2810453I06RIK | 0.50681238  |
| ILMN_2615026 |                | 8430427H17RIK | 0.50661484  |
| ILMN_2630078 | NM_010733.2    | LRRN3         | 0.506431762 |
| ILMN_2587859 | XR_034960.1    | LOC668837     | 0.50641222  |
| ILMN_2929952 | NM_030692.1    | SACM1L        | 0.506215066 |
| ILMN_2650953 | NM_011390.2    | SLC12A7       | 0.50593528  |

|              |                |               |             |
|--------------|----------------|---------------|-------------|
| ILMN_1250195 | NM_008681.2    | NDRG1         | 0.505925862 |
| ILMN_1260045 | NM_025820.3    | CRNKL1        | 0.505849525 |
| ILMN_1240256 | NM_012030.2    | SLC9A3R1      | 0.505584231 |
| ILMN_2644950 | NM_176842.2    | TPRKB         | 0.505501793 |
| ILMN_2458275 |                | UBAP1         | 0.504771582 |
| ILMN_1238346 | NM_144830.3    | TMEM106A      | 0.504728025 |
| ILMN_2878274 | NM_019877.1    | COPZ2         | 0.504471695 |
| ILMN_2889274 | NM_172926.1    | SNX14         | 0.504459453 |
| ILMN_1232231 | NM_029782.3    | CALR3         | 0.50419404  |
| ILMN_2559969 |                | A230050A16RIK | 0.504158321 |
| ILMN_2933655 | NM_025680.2    | CTNNB1        | 0.504036752 |
| ILMN_2957665 | NM_027877.2    | MUS81         | 0.503194713 |
| ILMN_1218648 | XM_001477857.1 | LOC100042011  | 0.503170104 |
| ILMN_2492403 |                | CD151         | 0.503064597 |
| ILMN_1243340 | NM_007888.3    | DVL2          | 0.502662068 |
| ILMN_2566477 |                | C730026O12RIK | 0.502578166 |
| ILMN_2543851 | NM_027016.2    | SEC62         | 0.502408793 |
| ILMN_1240650 |                | 1520402A20RIK | 0.501727689 |
| ILMN_1248022 |                | E330020G21RIK | 0.501650249 |
| ILMN_2588597 | NM_001033472.2 | A830080D01RIK | 0.501555858 |
| ILMN_1247404 | XM_001002154.1 | B230312I18RIK | 0.501526701 |
| ILMN_2773936 |                | EDG5          | 0.501447346 |
| ILMN_2608166 | NM_177303.4    | LRRN4         | 0.50053434  |
| ILMN_1257503 | NM_080556.2    | TM9SF2        | 0.500524895 |
| ILMN_2776304 | NM_011591.4    | TIMM17B       | 0.500405995 |
| ILMN_2722913 | NM_172407.2    | CDKN2AIP      | 0.500399662 |
| ILMN_2692927 | NM_175283.2    | SRD5A1        | 0.500381623 |
| ILMN_2669774 | NM_145524.2    | METTL8        | 0.500258554 |
| ILMN_2806250 | NM_028238.5    | RAB38         | 0.50010494  |
| ILMN_2868457 | NM_172528.2    | LRRC1         | 0.50003858  |
| ILMN_1217804 | NM_013643.1    | PTPN5         | 0.49993187  |
| ILMN_1252459 | NM_153532.2    | ZFP280C       | 0.499888244 |
| ILMN_2649392 | NM_153795.1    | FERMT3        | 0.499810986 |
| ILMN_2929723 | NM_009564.1    | ZFP64         | 0.499723273 |
| ILMN_2780848 | NM_145070.2    | HIP1R         | 0.499665087 |
| ILMN_2724285 | XM_358792.1    | 5730478M09RIK | 0.499623273 |
| ILMN_3001650 | NM_013864.1    | NDRG2         | 0.499233844 |
| ILMN_2864497 | NM_011986.2    | NCDN          | 0.499062474 |
| ILMN_2751948 |                | HIST2H2AA1    | 0.49901174  |
| ILMN_3105499 | NM_001042487.1 | DLGAP4        | 0.499002936 |
| ILMN_2588771 | NM_015821.1    | FBXL8         | 0.498979957 |
| ILMN_2598438 | NM_144524.1    | ANGEL1        | 0.498928027 |
| ILMN_2458274 | NM_023305.3    | UBAP1         | 0.498906777 |
| ILMN_1224883 | NM_009579.3    | SLC30A1       | 0.498768864 |
| ILMN_2790512 | NM_144525.2    | 1110039B18RIK | 0.498568785 |
| ILMN_1232041 | NM_011803.2    | KLF6          | 0.49832867  |



|              |                |                 |             |
|--------------|----------------|-----------------|-------------|
| ILMN_2730829 | NM_022418.2    | TMUB1           | 0.498197016 |
| ILMN_2759167 | NM_001083328.1 | GTPBP5          | 0.498187741 |
| ILMN_2639543 | NM_172558.2    | GEMIN5          | 0.498127249 |
| ILMN_2537704 | XM_357506.1    | LOC384229       | 0.497866877 |
| ILMN_2908546 | NM_145760.2    | ARFGAP1         | 0.497862014 |
| ILMN_2913913 | NM_001009573.2 | UNC13D          | 0.497607511 |
| ILMN_1253972 | NM_028679.3    | IRAK3           | 0.497576837 |
| ILMN_1237606 |                | 2310007G05RIK   | 0.49744267  |
| ILMN_2419247 | NM_173378.2    | TRP53BP2        | 0.497267124 |
| ILMN_1221904 | NM_011307.2    | UIMC1           | 0.497155678 |
| ILMN_2921031 | NM_025727.1    | KLHL10          | 0.496896041 |
| ILMN_1228115 |                | SIX5            | 0.496725114 |
| ILMN_2669361 | XM_131496.4    | 2310009E04RIK   | 0.496171862 |
| ILMN_1245768 | NM_010492.3    | ICA1            | 0.495907761 |
| ILMN_2687169 | NM_008321.1    | ID3             | 0.495846749 |
| ILMN_3002095 | NM_016671.2    | IL27RA          | 0.495681146 |
| ILMN_2544661 |                | MAPBPIP-PENDING | 0.495679807 |
| ILMN_1251193 |                | A630084D02RIK   | 0.495381755 |
| ILMN_2828731 | NM_134089.1    | SCRIB           | 0.495295    |
| ILMN_2684455 | NM_133932.2    | TADA3L          | 0.494937824 |
| ILMN_2594433 | NM_146092.1    | TAF6L           | 0.494834761 |
| ILMN_1247541 | XM_147738.1    | 2900016G23RIK   | 0.494532459 |
| ILMN_2605268 | NM_033526.2    | UBQLN4          | 0.493563246 |
| ILMN_2954195 | NM_023912.2    | SCYL1           | 0.493486565 |
| ILMN_2990872 | NM_177262.3    | PKN1            | 0.493456228 |
| ILMN_2669991 | NM_028343.3    | TMEM135         | 0.492311038 |
| ILMN_3139693 | NM_001003955.2 | RAB11FIP5       | 0.492306364 |
| ILMN_3092653 | NM_001081390.1 | PALLD           | 0.492094298 |
| ILMN_2764466 | NM_029341.1    | CAPSL           | 0.492040173 |
| ILMN_1255926 | NM_138605.2    | PPP1R3F         | 0.49183     |
| ILMN_2548010 | NM_175606.2    | HOPX            | 0.491800609 |
| ILMN_2777512 |                | NPEPL1          | 0.491792904 |
| ILMN_2786442 | NM_022415.2    | PTGES           | 0.491448297 |
| ILMN_2593774 | NM_025427.2    | 1190002H23RIK   | 0.491346112 |
| ILMN_1216183 | NM_011336.1    | CCL27           | 0.491334584 |
| ILMN_2981545 | NM_008546.2    | MFAP2           | 0.491137853 |
| ILMN_2747480 | NM_026130.1    | SRPR            | 0.491109289 |
| ILMN_2677233 | NM_153600.2    | TTC26           | 0.490782974 |
| ILMN_1246846 | NM_146259.3    | ZFP668          | 0.490123516 |
| ILMN_2451013 | NM_001097644.1 | CCNYL1          | 0.489987619 |
| ILMN_2720572 | XM_130129.3    | 1700026L06RIK   | 0.489892871 |
| ILMN_2705991 | NM_009906.4    | TPP1            | 0.489882962 |
| ILMN_1247990 | NM_011221.2    | PURB            | 0.489802674 |
| ILMN_2632536 | NM_183112.2    | 1700029I15RIK   | 0.489407865 |
| ILMN_1258738 | NM_172257.3    | SIDT2           | 0.489069553 |
| ILMN_1257904 |                | 2810403A07RIK   | 0.488747514 |

|              |                |               |             |
|--------------|----------------|---------------|-------------|
| ILMN_2699704 | NM_030152.4    | NOL3          | 0.488652556 |
| ILMN_2723095 | NM_009023.2    | RAPSN         | 0.488493398 |
| ILMN_2454339 |                | 2310010J17RIK | 0.488359495 |
| ILMN_1245673 | NM_144534.1    | TMEM38A       | 0.488345738 |
| ILMN_1233136 |                | D130074M14RIK | 0.488296385 |
| ILMN_1260456 | NM_133943.2    | HSD3B7        | 0.488242    |
| ILMN_3154553 | NM_001037493.1 | SLC41A3       | 0.487692269 |
| ILMN_1245330 | NM_019709.3    | MBTPS1        | 0.487559772 |
| ILMN_1223929 | NM_019936.2    | CRIP1         | 0.487413471 |
| ILMN_2972829 | NM_020261.2    | PSG23         | 0.487016554 |
| ILMN_2952587 | NM_176843.2    | INTS5         | 0.486767756 |
| ILMN_3136867 | NM_027261.1    | JOSD3         | 0.486626732 |
| ILMN_2450096 | NM_013705.1    | ZFP30         | 0.486539424 |
| ILMN_2719784 | XM_001472574.1 | LOC100044566  | 0.486420544 |
| ILMN_3075712 | NM_011416.2    | SMARCA2       | 0.486208467 |
| ILMN_3123759 | NM_144560.2    | GAS2L1        | 0.485968149 |
| ILMN_2900617 | NM_053254.2    | TLE6          | 0.485940085 |
| ILMN_2738122 | NM_028331.2    | C1QTNF6       | 0.485835345 |
| ILMN_1219210 | NM_008583.1    | MEN1          | 0.485633245 |
| ILMN_1217225 | NM_025911.2    | CCDC91        | 0.485416925 |
| ILMN_1218921 | XM_981204.1    | MYO9A         | 0.48539355  |
| ILMN_2492961 |                | 6530401N04RIK | 0.485304909 |
| ILMN_2986978 | NM_176996.3    | SMO           | 0.485288475 |
| ILMN_1240381 | NM_011123.2    | PLP1          | 0.484950922 |
| ILMN_1259447 |                | C430049K18RIK | 0.484822387 |
| ILMN_2471166 | NM_145439.1    | TMC6          | 0.484514406 |
| ILMN_1249514 | NM_010687.1    | LARGE         | 0.484502785 |
| ILMN_3028324 | NR_002321.1    | TUG1          | 0.484448154 |
| ILMN_1230314 | NM_001081072.1 | SLC27A6       | 0.484441102 |
| ILMN_2660505 | NM_183336.1    | IGSF1         | 0.484333852 |
| ILMN_1232894 | NM_133206.2    | ZNRF1         | 0.484181246 |
| ILMN_2859348 | NM_001001176.1 | TAF9B         | 0.484046537 |
| ILMN_1212993 | NM_029945.2    | SMPD4         | 0.483848236 |
| ILMN_1255175 | NM_133952.1    | UNC45A        | 0.483781469 |
| ILMN_2688262 | NM_007780.3    | CSF2RB        | 0.483656335 |
| ILMN_1249550 | NM_012056.1    | FKBP9         | 0.48361736  |
| ILMN_1241443 | NM_008328.2    | IFI203        | 0.483468567 |
| ILMN_1227012 | NM_026610.1    | NDUFB4        | 0.483375768 |
| ILMN_1224240 |                | A430070A22RIK | 0.48326834  |
| ILMN_1244291 | NM_010288.2    | GJA1          | 0.483192281 |
| ILMN_2753108 | NM_009298.3    | SURF6         | 0.482951297 |
| ILMN_3066673 | NM_001024849.1 | LOC329575     | 0.482835656 |
| ILMN_1239874 | NM_138303.1    | YIPF2         | 0.482727696 |
| ILMN_1250011 | NM_009427.2    | TOB1          | 0.482597511 |
| ILMN_1236133 | NM_146206.4    | TPCN2         | 0.482372843 |
| ILMN_1217180 | NM_026820.2    | IFITM1        | 0.482118593 |

|              |                |               |             |
|--------------|----------------|---------------|-------------|
| ILMN_1221157 | NM_031170.2    | KRT8          | 0.482067787 |
| ILMN_2422438 | NM_177780.3    | DOCK5         | 0.482028839 |
| ILMN_2609323 | XM_359281.1    | LST1          | 0.481984378 |
| ILMN_3144289 | NM_011632.2    | TRAF3         | 0.481712288 |
| ILMN_1216953 | NM_001077638.1 | PRMT2         | 0.481695816 |
| ILMN_1236470 |                | 4632413K17RIK | 0.481669308 |
| ILMN_2674966 |                | IGSF10        | 0.481332706 |
| ILMN_2616565 | NM_011401.3    | SLC2A3        | 0.481195436 |
| ILMN_1226606 | NM_133804.2    | TMEM132A      | 0.481136915 |
| ILMN_2771518 | NM_007601.1    | CAPN3         | 0.481074439 |
| ILMN_2872599 | NM_144849.1    | ANKRD54       | 0.480954639 |
| ILMN_1235688 |                | CD151         | 0.480756667 |
| ILMN_2465683 | NM_199025.2    | ZBTB26        | 0.480693687 |
| ILMN_1231814 | NM_013653.2    | CCL5          | 0.480658845 |
| ILMN_2716098 | NM_013559.1    | HSP105        | 0.480428955 |
| ILMN_1243120 | XM_989165.1    | EG434228      | 0.480254644 |
| ILMN_2630827 | NM_133858.3    | 4930504E06RIK | 0.480233992 |
| ILMN_2892441 | NM_010357.1    | GSTA4         | 0.480151324 |
| ILMN_1240403 | XR_031635.1    | LOC677216     | 0.48003859  |
| ILMN_2519345 | NM_013841.2    | VPS45         | 0.480003108 |
| ILMN_1257291 |                | D030029J20RIK | 0.479836019 |
| ILMN_1259596 |                | 1190009E20RIK | 0.479813015 |
| ILMN_1220548 | NM_153521.1    | LRRC41        | 0.479807764 |
| ILMN_2846368 | NM_175103.2    | BOLA2         | 0.479697263 |
| ILMN_2487517 |                | SSFA2         | 0.47964092  |
| ILMN_1239765 | NM_012021.2    | PRDX5         | 0.479626584 |
| ILMN_2754287 | NM_146079.1    | GUCA1B        | 0.479600825 |
| ILMN_2600042 | NM_028756.2    | SLC35A5       | 0.479540531 |
| ILMN_2684234 | NM_021297.1    | TLR4          | 0.479370619 |
| ILMN_1219067 | NM_146115.3    | A830007P12RIK | 0.479158218 |
| ILMN_2723190 | NM_008189.2    | GUCA1A        | 0.479145553 |
| ILMN_2668261 | NM_134420.3    | SLC26A6       | 0.479072733 |
| ILMN_2832682 | NM_025735.1    | MAP1LC3A      | 0.478903914 |
| ILMN_3159840 | NM_001037997.1 | FERT2         | 0.478871359 |
| ILMN_2453954 | NM_177718.3    | 1600021P15RIK | 0.478570686 |
| ILMN_2779913 | NM_080795.3    | LNX2          | 0.478569487 |
| ILMN_2520748 | NM_026107.2    | ZKSCAN6       | 0.478487667 |
| ILMN_1220115 |                | D130063H01RIK | 0.47829601  |
| ILMN_3162839 | NM_001034060.2 | RUFY4         | 0.478122522 |
| ILMN_3136561 | NM_009242.1    | SPARC         | 0.477984294 |
| ILMN_2445166 | NM_009504.3    | VDR           | 0.477970108 |
| ILMN_1231555 | NM_028888.1    | 4931428F04RIK | 0.477939313 |
| ILMN_2616877 |                | SLC39A1       | 0.477767595 |
| ILMN_1254104 |                | D030028O16RIK | 0.477515942 |
| ILMN_3007758 | NM_172728.1    | CREB5         | 0.477454918 |
| ILMN_1227266 | NM_175232.3    | 5830427D03RIK | 0.477406015 |

|              |                |               |             |
|--------------|----------------|---------------|-------------|
| ILMN_1243107 | NM_139206.1    | CENTD3        | 0.47715621  |
| ILMN_2732695 | NM_022980.4    | RCAN3         | 0.477086185 |
| ILMN_3101385 | NM_138754.1    | CDIPT         | 0.477049324 |
| ILMN_3095005 | NM_011717.2    | WIZ           | 0.476959468 |
| ILMN_3161021 | NM_011871.2    | PRKRA         | 0.47625425  |
| ILMN_2723346 | NM_001033148.2 | 1700029J07RIK | 0.476233266 |
| ILMN_1234516 | NM_025556.2    | 2410022L05RIK | 0.47607312  |
| ILMN_1244096 | NM_001081161.1 | FAM171A1      | 0.476054157 |
| ILMN_2439102 |                | C130002N06    | 0.476015631 |
| ILMN_1255779 | NM_018775.3    | TBC1D8        | 0.475421561 |
| ILMN_1244077 | NM_177215.3    | OCRL          | 0.475279174 |
| ILMN_2919263 | NM_153150.1    | SLC25A1       | 0.475235351 |
| ILMN_2794023 | NM_001033315.1 | HIPK4         | 0.474989769 |
| ILMN_2750035 | NM_020252.2    | NRXN1         | 0.47483164  |
| ILMN_2772752 | NM_133694.2    | FBXL15        | 0.474814236 |
| ILMN_2890496 | NM_015754.2    | RBBP9         | 0.474753443 |
| ILMN_2756658 | NM_019746.4    | PDCD5         | 0.474492689 |
| ILMN_1226195 | NM_013863.4    | BAG3          | 0.474425564 |
| ILMN_3153982 | NM_001037098.1 | NACC2         | 0.474386581 |
| ILMN_2837476 | NM_008583.1    | MEN1          | 0.47400284  |
| ILMN_1239808 | NM_027309.1    | LYSMD2        | 0.473593979 |
| ILMN_1230176 | XR_035342.1    | 1810032O08RIK | 0.473438813 |
| ILMN_2687156 | NM_176963.4    | GALM          | 0.473226087 |
| ILMN_2873319 | NM_008866.2    | LYPLA1        | 0.472949794 |
| ILMN_2794796 | NM_148952.1    | E2F4          | 0.472888639 |
| ILMN_2701948 | NM_030174.2    | MCTP1         | 0.472867186 |
| ILMN_2846432 | NM_011700.1    | VILL          | 0.472735719 |
| ILMN_2631994 | NM_138753.2    | HEXIM1        | 0.472355192 |
| ILMN_2672708 | NM_172784.2    | LRP11         | 0.472240269 |
| ILMN_1213656 |                | 9530025L16RIK | 0.472174492 |
| ILMN_1245984 | NM_022999.1    | PRRG2         | 0.472084947 |
| ILMN_2930933 | NM_008717.1    | ZFML          | 0.471956213 |
| ILMN_1237715 |                | B230353O14RIK | 0.471863187 |
| ILMN_1239859 | NM_020252.2    | NRXN1         | 0.471586709 |
| ILMN_1255556 | XM_001477665.1 | LOC100047214  | 0.471459687 |
| ILMN_3126458 | NM_198010.2    | ANKRD17       | 0.471368932 |
| ILMN_2910020 | NM_001001986.1 | 8430427H17RIK | 0.471316894 |
| ILMN_1259340 |                | 1810073M12RIK | 0.471168544 |
| ILMN_1251521 |                | ADAMTS6       | 0.471018898 |
| ILMN_1243129 |                | SLC11A2       | 0.470999001 |
| ILMN_1229301 | XM_992807.2    | LOC676779     | 0.470951843 |
| ILMN_2466453 | XM_988852.1    | 1500004F05RIK | 0.470421117 |
| ILMN_2684402 |                | 1810022K09RIK | 0.470376709 |
| ILMN_2855515 | NM_015801.1    | PNPLA6        | 0.470239154 |
| ILMN_2776008 | NM_029555.2    | GSTK1         | 0.470137342 |
| ILMN_2619594 | NM_010549.2    | IL11RA1       | 0.469938305 |

|              |                |                  |             |
|--------------|----------------|------------------|-------------|
| ILMN_2611027 | NM_013872.2    | PMM1             | 0.469843103 |
| ILMN_2526227 | XM_355202.1    | LOC381260        | 0.469827999 |
| ILMN_3007020 | NM_001024560.1 | B930037P14RIK    | 0.469792471 |
| ILMN_2656810 | XM_986338.2    | FANCE            | 0.469741183 |
| ILMN_1252902 | NM_001081347.1 | RHOBTB1          | 0.469599789 |
| ILMN_2645816 | NM_019696.1    | CPXM1            | 0.469101038 |
| ILMN_2701543 | NM_207232.1    | PTPDC1           | 0.469032791 |
| ILMN_1222794 | NM_175134.3    | ANKRD46          | 0.468837839 |
| ILMN_2945560 | NM_175429.3    | KCTD12B          | 0.468753532 |
| ILMN_1249905 | NM_001048228.1 | DBNDD2           | 0.468549543 |
| ILMN_2594746 | NM_025788.2    | NACC1            | 0.4685215   |
| ILMN_2957036 | NM_145355.2    | RNF185           | 0.468335802 |
| ILMN_2682865 | NM_198223.1    | ASPSCR1          | 0.468128739 |
| ILMN_2757582 | NM_010736.3    | LTBR             | 0.467879989 |
| ILMN_1232170 | NM_133930.1    | CRELD1           | 0.467819427 |
| ILMN_2836749 | NM_001033158.1 | RASL12           | 0.467793712 |
| ILMN_3058975 | NM_008033.2    | FNTA             | 0.46740457  |
| ILMN_1232182 | NM_023465.3    | CTNNBIP1         | 0.467365593 |
| ILMN_2913869 | NM_001024626.2 | BC062115         | 0.467066837 |
| ILMN_2845045 | NM_024256.2    | B3GAT3           | 0.466929945 |
| ILMN_1237338 | NM_013932.3    | DDX25            | 0.466572937 |
| ILMN_2855928 | NM_015773.1    | SPAG6            | 0.466563282 |
| ILMN_1259440 | XM_001472312.1 | 6720489N17RIK    | 0.4655958   |
| ILMN_3038404 | NM_001037878.1 | TCF25            | 0.46557906  |
| ILMN_1256668 | NM_133999.1    | FIG4             | 0.465446116 |
| ILMN_2753356 | NM_183316.2    | SNAPC5           | 0.465244901 |
| ILMN_2600043 | NM_028756.3    | SLC35A5          | 0.465211252 |
| ILMN_2506115 | NM_009469.3    | ULK1             | 0.465180301 |
| ILMN_2512541 | NM_080560.3    | UBE2N            | 0.465105825 |
| ILMN_1257672 | XM_110361.3    | B230205M18       | 0.465094237 |
| ILMN_2661082 | NM_020028.3    | LPAR2            | 0.465066295 |
| ILMN_2596278 | XM_125750.3    | TCFE2A           | 0.464975475 |
| ILMN_2456696 |                | POLR2A           | 0.464945804 |
| ILMN_1235324 | NM_001081241.2 | 2310066E14RIK    | 0.464781432 |
| ILMN_2748120 | XM_907140.3    | AKAP13           | 0.464452329 |
| ILMN_2678400 | NM_133766.1    | C920006C10RIK    | 0.46416402  |
| ILMN_2868013 | NM_023792.1    | PANK1            | 0.464144904 |
| ILMN_2683486 | XM_001476259.1 | AI115600         | 0.463963659 |
| ILMN_1225840 | XM_001479710.1 | LOC100043189     | 0.463887719 |
| ILMN_3001013 | NM_001009575.2 | ARMCX5           | 0.46352381  |
| ILMN_3023656 | NM_001015876.1 | TYW1             | 0.463481051 |
| ILMN_2421751 | NM_153103.2    | KIF1C            | 0.46339954  |
| ILMN_2751572 | NM_198014.2    | SLAIN1           | 0.463353875 |
| ILMN_3161906 | NM_001034882.2 | EG432879         | 0.46319579  |
| ILMN_2417991 | NM_011665.3    | UBE2I            | 0.463117657 |
| ILMN_1220845 | AK002569.1     | SCL0001651.1_229 | 0.462984798 |

|              |                |               |             |
|--------------|----------------|---------------|-------------|
| ILMN_1256378 | NM_145616.3    | LRRRC49       | 0.462800712 |
| ILMN_3120565 | NM_181666.1    | FUK           | 0.462522365 |
| ILMN_2436369 |                | 2010004M13RIK | 0.462472876 |
| ILMN_2929518 | NM_146248.1    | CCHCR1        | 0.462333112 |
| ILMN_1229553 | NM_207205.1    | IGSF3         | 0.462199802 |
| ILMN_1230007 | NM_172498.2    | PTK2B         | 0.462145499 |
| ILMN_2868987 | NM_011421.1    | SMPD1         | 0.462022407 |
| ILMN_1214964 | NM_026764.2    | GSTM4         | 0.461992482 |
| ILMN_2614494 | NM_010176.2    | FAH           | 0.461803121 |
| ILMN_2758087 | NM_009833.1    | CCNT1         | 0.461759699 |
| ILMN_3139668 | NM_053193.1    | CPSF1         | 0.461580556 |
| ILMN_3077034 | NM_032006.2    | MMP1A         | 0.461265951 |
| ILMN_2615901 | NM_007982.1    | PTK2          | 0.461196675 |
| ILMN_2602011 | NM_011112.2    | PAPOLA        | 0.461144634 |
| ILMN_1252830 | NM_008624.3    | MRAS          | 0.460850992 |
| ILMN_2876579 | NM_024432.2    | UBXN6         | 0.460841332 |
| ILMN_1236376 | NM_023906.3    | ASB3          | 0.460792777 |
| ILMN_2626235 | NM_010706.1    | LGALS4        | 0.460642604 |
| ILMN_1224485 | XM_128555.4    | EME2          | 0.460572707 |
| ILMN_1220640 | NM_133847.3    | TM9SF4        | 0.460299703 |
| ILMN_2940961 | NM_007923.1    | ELK4          | 0.460184847 |
| ILMN_2599739 | NM_176921.2    | 6030419C18RIK | 0.460140048 |
| ILMN_2736360 | NM_001033134.2 | 2610002J02RIK | 0.460087352 |
| ILMN_3151631 | NM_027554.2    | USP38         | 0.459861753 |
| ILMN_2546423 |                | 1700022J01RIK | 0.459828909 |
| ILMN_2967654 | NM_009023.1    | RAPSN         | 0.459815341 |
| ILMN_2841024 | NM_001034885.1 | PNPLA1        | 0.459783637 |
| ILMN_1226152 | NM_028070.1    | ALKBH4        | 0.459672779 |
| ILMN_2594593 | NM_019579.1    | MPP5          | 0.459662229 |
| ILMN_1231587 | NM_153544.3    | BC030867      | 0.459597014 |
| ILMN_2650774 | NM_133767.2    | MTIF2         | 0.459584468 |
| ILMN_1251617 |                | UTRN          | 0.459488597 |
| ILMN_2860850 | NM_008793.1    | PCSK4         | 0.459221295 |
| ILMN_1219915 | NM_026384.3    | DGAT2         | 0.459125649 |
| ILMN_2475156 | NR_001463.2    | XIST          | 0.459045468 |
| ILMN_2660466 | XM_899874.3    | EG433229      | 0.459026599 |
| ILMN_2424895 | NM_173185.2    | CSNK1G1       | 0.458934588 |
| ILMN_2850792 | NM_172767.2    | VWA5A         | 0.458548709 |
| ILMN_2723718 | NM_026555.1    | RCN3          | 0.458390471 |
| ILMN_2722583 | NM_172478.2    | TBC1D25       | 0.458347644 |
| ILMN_1222523 | NM_025685.3    | COL27A1       | 0.458326123 |
| ILMN_2637624 | NM_026437.2    | 1810055E12RIK | 0.458180448 |
| ILMN_2615628 | NM_026213.3    | TTC33         | 0.457462683 |
| ILMN_1229640 | XR_034455.1    | LOC100048372  | 0.457328649 |
| ILMN_1228399 | NM_001081215.1 | DDX60         | 0.457197084 |
| ILMN_2488806 |                | 5430417C01RIK | 0.45719651  |

|              |                |               |             |
|--------------|----------------|---------------|-------------|
| ILMN_3000298 | NM_183321.1    | BC053749      | 0.456994006 |
| ILMN_1232901 | NM_001080742.1 | VAMP5         | 0.456916078 |
| ILMN_2623216 | NM_016783.3    | PGRMC1        | 0.456783627 |
| ILMN_1218266 | NM_010789.2    | MEIS1         | 0.456505094 |
| ILMN_2715226 | NM_023628.2    | ANXA9         | 0.456371868 |
| ILMN_1241458 | NM_001040112.1 | ARAP1         | 0.456037938 |
| ILMN_2795410 | NM_025326.2    | TMEM176A      | 0.455917577 |
| ILMN_2729374 | NM_144893.1    | SLC35C2       | 0.455883275 |
| ILMN_1258770 | XM_890234.2    | LRRC51        | 0.455708941 |
| ILMN_2705324 | NM_010433.1    | HIPK2         | 0.455685333 |
| ILMN_1223179 | NM_010398.3    | H2-T23        | 0.455668059 |
| ILMN_2774618 |                | 2610020008RIK | 0.455450676 |
| ILMN_2669766 | NM_025613.3    | EID1          | 0.455373456 |
| ILMN_1248522 | NM_026893.2    | WDR40A        | 0.455312404 |
| ILMN_1238852 | NM_025579.2    | TAF12         | 0.455232088 |
| ILMN_2827036 | NM_013630.2    | PKD1          | 0.454941997 |
| ILMN_2747507 | NM_011256.1    | PITPNM2       | 0.454927081 |
| ILMN_2825391 | NM_175308.2    | MOBK12C       | 0.454923563 |
| ILMN_1244356 | NM_028722.1    | 4121402D02RIK | 0.454873187 |
| ILMN_2734624 | NM_028307.1    | TDRKH         | 0.454776046 |
| ILMN_1257477 | NM_144925.3    | TNRC6A        | 0.454724173 |
| ILMN_2801683 | NM_019771.1    | DSTN          | 0.454690037 |
| ILMN_2503893 |                | PREB          | 0.454656798 |
| ILMN_1229741 | NM_024457.2    | RAP1B         | 0.454207572 |
| ILMN_3109076 | NM_001042649.1 | DCUN1D2       | 0.454183094 |
| ILMN_2528305 | XM_001475091.1 | D3ERTD254E    | 0.454150946 |
| ILMN_2456536 | XM_988959.2    | 1700080G18RIK | 0.454048641 |
| ILMN_2920736 | NM_133234.1    | BBC3          | 0.453938361 |
| ILMN_2634157 | NM_028059.2    | ZFP654        | 0.453760843 |
| ILMN_1246861 | NM_021281.1    | CTSS          | 0.453463234 |
| ILMN_2690551 | NM_008690.3    | NFKBIE        | 0.453238876 |
| ILMN_2440066 | NM_011906.1    | TPRA40        | 0.453056186 |
| ILMN_2733465 | NM_025590.3    | ACOT11        | 0.453028693 |
| ILMN_2859847 | NM_133198.1    | PYGL          | 0.452887413 |
| ILMN_2875938 | NM_025835.1    | PCCB          | 0.452833966 |
| ILMN_1249986 | NM_027189.2    | GEMIN7        | 0.452597254 |
| ILMN_2740006 | NM_001005248.1 | HPS5          | 0.452524547 |
| ILMN_2799351 | NM_025590.3    | ACOT11        | 0.452262241 |
| ILMN_2754447 | NM_011746.2    | MKRN3         | 0.452259751 |
| ILMN_1215661 | NM_009422.2    | TRAF2         | 0.452125945 |
| ILMN_1236828 | NM_028846.3    | USP20         | 0.452071145 |
| ILMN_1213148 | NM_019488.4    | SLC2A8        | 0.451827085 |
| ILMN_2511806 | NM_177562.4    | CLEC16A       | 0.451761907 |
| ILMN_2812215 | NM_001004156.2 | PLEKHG5       | 0.451639384 |
| ILMN_2964996 | NM_177351.2    | C630028N24RIK | 0.451540903 |
| ILMN_2887065 | NM_080638.1    | MVP           | 0.451457779 |

|              |                |               |             |
|--------------|----------------|---------------|-------------|
| ILMN_2993779 | NM_144877.1    | 5630401D24RIK | 0.451376782 |
| ILMN_3156058 | NM_198223.1    | ASPSCR1       | 0.451376606 |
| ILMN_1251849 |                | 4930506F14RIK | 0.451270996 |
| ILMN_2773699 | NM_029884.1    | HGSNAT        | 0.451198301 |
| ILMN_2780323 | NM_009388.2    | TKT           | 0.451037834 |
| ILMN_3131063 | NM_007632.2    | CCND3         | 0.450881204 |
| ILMN_2752345 | NM_028990.3    | TMEM168       | 0.450821959 |
| ILMN_1232026 | NM_001081428.1 | FAM184A       | 0.450516642 |
| ILMN_2964344 | NM_172624.1    | DPP9          | 0.450384104 |
| ILMN_2531737 | XM_140740.3    | LOC240672     | 0.450301272 |
| ILMN_2680086 | NM_029777.2    | RHBDD1        | 0.450078495 |
| ILMN_1241380 | NM_026382.2    | 6530403A03RIK | 0.450005739 |
| ILMN_1237033 | XR_003896.1    | LOC384710     | 0.44993193  |
| ILMN_1249910 | NM_023792.1    | PANK1         | 0.449805223 |
| ILMN_2587761 | NM_008441.1    | KIF1B         | 0.449765205 |
| ILMN_1243370 | NM_028057.2    | CYB5R1        | 0.449690656 |
| ILMN_2491741 | NM_001081302.1 | TRIO          | 0.449450809 |
| ILMN_2896341 | NM_145624.2    | ZFP709        | 0.449396665 |
| ILMN_2830098 | NM_001045523.1 | BAHD1         | 0.449372627 |
| ILMN_2436890 |                | DHRXS         | 0.449343918 |
| ILMN_1248510 | NM_009230.3    | SOAT1         | 0.449259851 |
| ILMN_1224093 | NM_145438.2    | LLGL2         | 0.448621161 |
| ILMN_2645448 | NM_030066.2    | ARMCX1        | 0.448456097 |
| ILMN_1229019 | NM_173401.2    | FBXO44        | 0.448455552 |
| ILMN_2953596 | NM_007892.2    | E2F5          | 0.448237642 |
| ILMN_1236320 | NM_008622.3    | MPV17         | 0.448114529 |
| ILMN_1236725 | NM_008107.3    | GDF1          | 0.447977983 |
| ILMN_1231514 | NM_183091.2    | NFKBIL2       | 0.447845373 |
| ILMN_2761247 | NM_023525.1    | CAD           | 0.447786805 |
| ILMN_1244364 | NM_012040.2    | PNCK          | 0.447726918 |
| ILMN_1243433 | XR_034057.1    | LOC100048037  | 0.44769859  |
| ILMN_2900944 | NM_145138.1    | NEK9          | 0.44769721  |
| ILMN_2594443 | XM_129997.5    | TAF3          | 0.447667656 |
| ILMN_2681446 | NM_009191.3    | CLPB          | 0.447643222 |
| ILMN_1252757 | NM_027326.3    | MLLT3         | 0.447636031 |
| ILMN_2675333 | NM_198108.2    | MORN4         | 0.447516593 |
| ILMN_3057482 | NM_001024606.1 | 4833426J09RIK | 0.447429294 |
| ILMN_1254886 | NM_010165.2    | EYA2          | 0.447406693 |
| ILMN_2513205 |                | ACP2          | 0.447382297 |
| ILMN_2939517 | NM_001007590.2 | LOC433886     | 0.447365301 |
| ILMN_1249775 | NM_001080926.1 | LRP8          | 0.447360109 |
| ILMN_1245447 | NM_007435.1    | ABCD1         | 0.447285676 |
| ILMN_3143246 | NM_001077264.1 | AP2A1         | 0.447124176 |
| ILMN_2620574 | NM_029846.3    | ATG16L1       | 0.44710696  |
| ILMN_1259028 |                | D230048N11RIK | 0.447063304 |
| ILMN_2778799 | NM_026455.2    | 2510049I19RIK | 0.446517076 |



|              |                |                  |             |
|--------------|----------------|------------------|-------------|
| ILMN_2578237 |                | MBC2             | 0.446217989 |
| ILMN_1241229 | NM_001081290.1 | BAT2D            | 0.445886237 |
| ILMN_2688378 | NM_138747.1    | NOL1             | 0.445802028 |
| ILMN_2692799 | NM_177806.2    | PRPF39           | 0.445589686 |
| ILMN_2610435 | NM_020584.1    | TERF2IP          | 0.445588172 |
| ILMN_2600565 | NM_030700.1    | MAGED2           | 0.445585943 |
| ILMN_1240289 | NM_001033311.3 | BC023744         | 0.445470259 |
| ILMN_2879858 | NM_016979.1    | PRKX             | 0.445461256 |
| ILMN_2426491 | XM_910737.2    | YTHDC2           | 0.445398282 |
| ILMN_2705777 | NM_010360.2    | GSTM5            | 0.445199423 |
| ILMN_2699833 | NM_029274.2    | WBP7             | 0.444747889 |
| ILMN_2427560 | NM_009424.2    | TRAF6            | 0.444735378 |
| ILMN_2605004 | NM_023172.3    | NDUFB9           | 0.444730394 |
| ILMN_1244864 | NM_026450.2    | ZFP169           | 0.444541474 |
| ILMN_1258341 | NM_001001566.1 | CHPF             | 0.444480129 |
| ILMN_2811737 | NM_007609.1    | CASP4            | 0.444371804 |
| ILMN_1250776 |                | ARHGAP6          | 0.444164895 |
| ILMN_2758215 | XM_994286.2    | PARP4            | 0.444160303 |
| ILMN_2497957 | AK083573.1     | SCL0002507.1_236 | 0.44414084  |
| ILMN_2811018 | NM_145828.2    | XYLT2            | 0.443962715 |
| ILMN_1247385 |                | D130017N08RIK    | 0.443931437 |
| ILMN_1240104 | NM_181391.2    | CHCHD7           | 0.443338832 |
| ILMN_1259158 | NM_001001333.1 | HEXDC            | 0.443322631 |
| ILMN_1253966 | NM_008825.3    | PFKFB2           | 0.443295188 |
| ILMN_2432092 | NM_013852.2    | ABCF3            | 0.443264085 |
| ILMN_1216919 | NM_172596.1    | SEC24C           | 0.44325549  |
| ILMN_2914418 | NM_021607.2    | NCSTN            | 0.443203727 |
| ILMN_2723939 | NM_153073.2    | GAB3             | 0.443173627 |
| ILMN_2416559 |                | D330038K10RIK    | 0.443161583 |
| ILMN_2780619 | NM_026647.2    | ZDHHC21          | 0.442838716 |
| ILMN_1244515 | NM_030018.3    | TMEM50B          | 0.442625005 |
| ILMN_2689307 | NM_009260.2    | SPNB2            | 0.442385132 |
| ILMN_1215524 | NM_172614.3    | TMEM44           | 0.442032544 |
| ILMN_1233713 | NM_001037812.2 | ALS2CR4          | 0.441899354 |
| ILMN_2623844 | NM_175464.2    | PKP4             | 0.44182866  |
| ILMN_2674367 | NM_021604.2    | AGRN             | 0.441661685 |
| ILMN_2746812 | XM_126343.5    | 2410012H22RIK    | 0.441637916 |
| ILMN_2751925 | NM_133803.1    | DPP3             | 0.441557265 |
| ILMN_1222269 | XM_922412.2    | 1810011H11RIK    | 0.44107397  |
| ILMN_1251962 | NM_001081335.1 | PARC             | 0.440817711 |
| ILMN_3133817 | NM_029277.2    | ARHGAP12         | 0.440816042 |
| ILMN_2685023 | NM_027521.2    | HMHA1            | 0.440564522 |
| ILMN_1252152 |                | CYT28            | 0.440504915 |
| ILMN_2723523 | NM_013769.1    | TJP3             | 0.440396595 |
| ILMN_1254957 |                | MBTPS1           | 0.440234919 |
| ILMN_3036708 | NM_030719.3    | GATS             | 0.439948085 |

|              |                |               |             |
|--------------|----------------|---------------|-------------|
| ILMN_3021272 | NM_001038587.1 | ADAR          | 0.439917902 |
| ILMN_2838871 | NM_172257.1    | SIDT2         | 0.439911152 |
| ILMN_2682778 | NM_025886.3    | RASSF7        | 0.439601071 |
| ILMN_1260507 | NM_011462.1    | SPIN          | 0.439568216 |
| ILMN_2648098 | NM_080448.4    | SRGAP3        | 0.439552839 |
| ILMN_1213848 | NM_008403.4    | ITGB1BP1      | 0.439475898 |
| ILMN_2809701 | NM_080595.2    | EMID1         | 0.439385725 |
| ILMN_3082287 | NM_028081.2    | 4933421E11RIK | 0.43921028  |
| ILMN_2784950 | NM_011116.1    | PLD3          | 0.439174654 |
| ILMN_2865882 | NM_001001187.1 | 3830402I07RIK | 0.439154454 |
| ILMN_1214358 | NM_026270.3    | AKT1S1        | 0.439094133 |
| ILMN_2940358 | NM_172991.2    | C030048B08RIK | 0.438973985 |
| ILMN_2673274 | XM_924956.2    | SAFB          | 0.438452097 |
| ILMN_2526851 | XM_129965.3    | LOC227393     | 0.438144745 |
| ILMN_1226713 | NM_027745.1    | CCDC57        | 0.437942455 |
| ILMN_2705004 | NM_175429.3    | KCTD12B       | 0.437577284 |
| ILMN_2769893 |                | 2210013K02RIK | 0.437533569 |
| ILMN_1239002 | NM_013625.2    | PAFAH1B1      | 0.437474775 |
| ILMN_1257847 | NM_175413.2    | LRRC39        | 0.437121834 |
| ILMN_1225225 |                | 1500032P08RIK | 0.43710744  |
| ILMN_1232820 |                | TRRP5         | 0.436755472 |
| ILMN_2679937 | XM_001475483.1 | LOC100046056  | 0.436687917 |
| ILMN_3089834 | NM_010166.2    | EYA3          | 0.436577009 |
| ILMN_1213030 | NM_009006.2    | MAP4K2        | 0.436498165 |
| ILMN_2671286 | NM_030018.2    | TMEM50B       | 0.436456637 |
| ILMN_2627328 |                | DNASE2A       | 0.436436723 |
| ILMN_2636004 |                | 9530064J02    | 0.436373052 |
| ILMN_2908406 | NM_011172.2    | PRODH         | 0.436282786 |
| ILMN_3117650 | NM_153595.2    | NT5DC3        | 0.436200185 |
| ILMN_1258849 | XM_355209.1    | LOC381266     | 0.435977148 |
| ILMN_2685565 | NM_138302.1    | TYMP          | 0.435875416 |
| ILMN_1234445 |                | E430003J01RIK | 0.435593419 |
| ILMN_2772538 |                | TLK2          | 0.435589971 |
| ILMN_1228501 | NM_020507.3    | TOB2          | 0.435496464 |
| ILMN_1229957 | NM_010549.2    | IL11RA1       | 0.435479005 |
| ILMN_1234337 | NM_027203.3    | LENG1         | 0.435393808 |
| ILMN_1225214 | NM_009878.3    | CDKN2D        | 0.435280343 |
| ILMN_2467800 | NM_001033293.2 | UAP1L1        | 0.435160232 |
| ILMN_2689784 | NM_178076.2    | MCF2L         | 0.435024028 |
| ILMN_3147331 | NM_001033929.1 | THNSL2        | 0.43500769  |
| ILMN_2552589 |                | ABCC1A        | 0.434862543 |
| ILMN_2649671 |                | IPAS          | 0.434379408 |
| ILMN_2937136 | NM_146236.1    | TCEAL1        | 0.434369924 |
| ILMN_2606966 | NM_026735.2    | MOBK1A        | 0.434294529 |
| ILMN_2431237 | NM_013842.2    | XBP1          | 0.434278778 |
| ILMN_2657203 | XM_148491.1    | QTRTD1        | 0.434256222 |

|              |                |               |             |
|--------------|----------------|---------------|-------------|
| ILMN_2711651 | NM_026881.1    | 4930403O06RIK | 0.434211365 |
| ILMN_2671601 | NM_019979.1    | SELK          | 0.434181979 |
| ILMN_2734646 | NM_009287.4    | STIM1         | 0.433916692 |
| ILMN_2885348 | NM_144913.3    | MEPCE         | 0.43365465  |
| ILMN_2754266 | NM_011629.2    | NR2C1         | 0.433575272 |
| ILMN_1238614 | NM_016763.2    | HSD17B10      | 0.433478584 |
| ILMN_2912598 | NM_029505.1    | AP3M2         | 0.433356768 |
| ILMN_2616522 | NM_172122.1    | CROCC         | 0.433046036 |
| ILMN_2767871 | NM_018863.2    | PDYN          | 0.43288307  |
| ILMN_2666999 | XM_001478241.1 | LOC100047480  | 0.432873046 |
| ILMN_2613851 | NM_028059.2    | ZFP654        | 0.432833827 |
| ILMN_1242994 |                | AABP3-PENDING | 0.432812001 |
| ILMN_2439638 | NM_011632.2    | TRAF3         | 0.432692139 |
| ILMN_2436561 | NM_133683.3    | TMEM19        | 0.432688066 |
| ILMN_1232183 | NM_008598.1    | MGMT          | 0.432491604 |
| ILMN_2461098 | XM_912589.3    | PLXNB2        | 0.432417207 |
| ILMN_2727799 | NM_172275.1    | TRAFD1        | 0.432063047 |
| ILMN_2637757 | NM_008250.1    | HLX           | 0.432021471 |
| ILMN_1241595 | XM_358149.1    | LOC385252     | 0.431917952 |
| ILMN_2615232 | NM_001034085.1 | PPP2R1B       | 0.431913353 |
| ILMN_2660766 | NM_181858.1    | CD59B         | 0.431775224 |
| ILMN_2943176 | NM_178741.2    | KLHL8         | 0.431740552 |
| ILMN_1220320 | XM_895981.2    | 1110065P20RIK | 0.43148888  |
| ILMN_2933394 | NM_175934.2    | PPP1R10       | 0.431445436 |
| ILMN_1246900 | NM_001024624.1 | CDKL5         | 0.431270417 |
| ILMN_2784382 | NM_001039653.1 | LHX3          | 0.430945792 |
| ILMN_2619767 | NM_145978.1    | PDLIM2        | 0.43092847  |
| ILMN_2912111 | NM_001013379.2 | D10627        | 0.430677871 |
| ILMN_1237463 | NM_029746.2    | COG2          | 0.430596221 |
| ILMN_2543655 |                | 1810020C02RIK | 0.430515509 |
| ILMN_2624451 | XM_924798.2    | 4933407C03RIK | 0.430512254 |
| ILMN_2836710 | NM_009842.1    | CD151         | 0.430493138 |
| ILMN_2773485 | NM_178413.4    | THNSL2        | 0.430047004 |
| ILMN_2895000 | NM_144893.1    | SLC35C2       | 0.430015478 |
| ILMN_1251129 | NM_019834.3    | GIT2          | 0.429909523 |
| ILMN_2691623 | NM_011479.3    | SPTLC2        | 0.42987247  |
| ILMN_2438727 | NM_001081343.1 | 3110043O21RIK | 0.429813743 |
| ILMN_3114124 | NM_133943.2    | HSD3B7        | 0.429768765 |
| ILMN_2503166 | XM_001005388.1 | C330011F01RIK | 0.429688502 |
| ILMN_2437574 | AK051288.1     | SCL000548.1_6 | 0.429619774 |
| ILMN_1235179 | NM_146133.2    | GOLPH3L       | 0.429563692 |
| ILMN_1240264 | NM_198091.2    | USP2          | 0.429552879 |
| ILMN_2789425 | NM_011130.1    | POLB          | 0.429433506 |
| ILMN_2592909 |                | BC024814      | 0.42930849  |
| ILMN_1239637 |                | C430045L21RIK | 0.429240615 |
| ILMN_2792267 | NM_054096.1    | TIRAP         | 0.429075489 |

|              |                |               |             |
|--------------|----------------|---------------|-------------|
| ILMN_2440183 | XM_901483.3    | 2310028O11RIK | 0.429052145 |
| ILMN_1220550 |                | 6430402H23RIK | 0.428842174 |
| ILMN_2791410 | NM_133788.1    | ICMT          | 0.428793206 |
| ILMN_3111877 | NM_001039080.1 | RBMS2         | 0.428743068 |
| ILMN_1226703 | NM_001082476.1 | NDOR1         | 0.428602784 |
| ILMN_2621752 | NM_012057.3    | IRF5          | 0.428579592 |
| ILMN_1227624 | NM_053255.3    | ELAC1         | 0.428512543 |
| ILMN_2752883 | NM_010480.5    | HSP90AA1      | 0.428420871 |
| ILMN_1233905 | NM_178050.3    | ATL2          | 0.4283995   |
| ILMN_1224291 | NM_013594.1    | MBD1          | 0.428067961 |
| ILMN_1236703 | NM_001033316.2 | FFAR3         | 0.42803714  |
| ILMN_2794608 | NM_009737.1    | BCAT2         | 0.42801092  |
| ILMN_2453120 |                | C130065N10RIK | 0.428002493 |
| ILMN_2826216 | NM_080436.1    | RDH1          | 0.427858718 |
| ILMN_1226133 | NM_033324.2    | DGCR8         | 0.427817225 |
| ILMN_2693295 | NM_011160.2    | PRKG1         | 0.427777838 |
| ILMN_2979307 | NM_011848.1    | NEK3          | 0.427626037 |
| ILMN_1236258 | NM_172617.2    | ZFP523        | 0.427245103 |
| ILMN_2780499 | NM_028866.2    | WDR33         | 0.427152413 |
| ILMN_2694038 | NM_024229.2    | PCYT2         | 0.42708703  |
| ILMN_1213498 | NM_080448.4    | SRGAP3        | 0.426951784 |
| ILMN_2683613 | NM_008702.2    | NLK           | 0.42693661  |
| ILMN_2666272 | NM_133984.1    | HEMK1         | 0.426894792 |
| ILMN_1230882 | NM_001001319.3 | PRAMEL4       | 0.426666074 |
| ILMN_2737604 | NM_008141.2    | GNAT2         | 0.426231516 |
| ILMN_2417234 | NM_011010.2    | OMP           | 0.426225803 |
| ILMN_1216198 | NM_028198.1    | XPO5          | 0.42599263  |
| ILMN_1250612 | NM_198664.3    | TBC1D2        | 0.425874724 |
| ILMN_3156208 | NM_001038703.1 | GPR146        | 0.4256428   |
| ILMN_2950594 | NM_008667.2    | NAB1          | 0.425581228 |
| ILMN_2970381 | NM_019667.2    | STAM2         | 0.425478812 |
| ILMN_1231490 | XM_001479267.1 | 2410006H16RIK | 0.425344372 |
| ILMN_2701129 | XM_357260.1    | 4931426K16RIK | 0.4249165   |
| ILMN_3161790 | NM_001033207.2 | AI451557      | 0.424901142 |
| ILMN_1259559 | NM_008197.3    | H1FO          | 0.424882549 |
| ILMN_2894943 | NM_145929.1    | GGA1          | 0.424726654 |
| ILMN_2691460 | NM_026614.2    | NDUFA5        | 0.424714283 |
| ILMN_2781805 | NM_053208.2    | EGLN2         | 0.424710755 |
| ILMN_2522023 | NM_019742.4    | TUSC2         | 0.424649543 |
| ILMN_3161554 | NM_027889.1    | VPS11         | 0.424494675 |
| ILMN_1237342 |                | 4833438C02RIK | 0.424404266 |
| ILMN_2750767 | NM_018814.3    | PCNX          | 0.424386219 |
| ILMN_2469383 | NM_177692.3    | BLOC1S3       | 0.424236079 |
| ILMN_1217068 | NM_026954.1    | TUSC1         | 0.423905788 |
| ILMN_2691157 | NM_007835.2    | DCTN1         | 0.423784397 |
| ILMN_2709470 | NM_007853.4    | DEGS1         | 0.423713532 |

|              |                |               |             |
|--------------|----------------|---------------|-------------|
| ILMN_2918663 | NM_025346.1    | RMND5B        | 0.423516889 |
| ILMN_2923599 | NM_028816.2    | XPO6          | 0.423506148 |
| ILMN_1253753 |                | ELAC2         | 0.423460783 |
| ILMN_1218295 | NM_145138.1    | NEK9          | 0.423458287 |
| ILMN_2490548 | NM_053082.2    | TSPAN4        | 0.423336776 |
| ILMN_2748300 | NM_025563.3    | 2010012O05RIK | 0.423211331 |
| ILMN_2811240 | NM_176842.2    | TPRKB         | 0.423131001 |
| ILMN_2870487 | NM_153507.2    | CPNE2         | 0.422843841 |
| ILMN_1233001 | NM_001081367.1 | KCTD17        | 0.422767546 |
| ILMN_2841593 | NM_028263.1    | FGFBP3        | 0.422735604 |
| ILMN_2915060 | NM_138306.1    | DGKZ          | 0.4225428   |
| ILMN_2647972 | NM_178693.4    | COQ4          | 0.422490004 |
| ILMN_2757459 | XR_035207.1    | 4930451G09RIK | 0.422476886 |
| ILMN_2535490 | XM_356603.4    | LOC382645     | 0.422388524 |
| ILMN_2611450 | NM_026298.4    | IFT172        | 0.422366449 |
| ILMN_2721761 | NM_008667.2    | NAB1          | 0.422357553 |
| ILMN_1232741 |                | FDPS          | 0.422319612 |
| ILMN_2764551 | NM_183405.1    | COX6B2        | 0.422277803 |
| ILMN_2781835 | NM_172518.2    | FBXO42        | 0.422276865 |
| ILMN_2697766 | NM_145412.3    | 5830457O10RIK | 0.422260148 |
| ILMN_2499400 | NM_016794.2    | VAMP8         | 0.422041039 |
| ILMN_1253900 |                | 1810026B05RIK | 0.42199203  |
| ILMN_1256967 |                | AI875142      | 0.421829925 |
| ILMN_2590884 | NM_011113.3    | PLAUR         | 0.421772348 |
| ILMN_2718910 | XM_131731.3    | SLC30A2       | 0.421651918 |
| ILMN_2625716 | XM_134108.3    | HOOK3         | 0.421646188 |
| ILMN_2614884 | NM_008853.1    | PJA1          | 0.421633108 |
| ILMN_1235968 |                | A330043C08RIK | 0.421603744 |
| ILMN_2625167 | NM_013507.3    | EIF4G2        | 0.421444244 |
| ILMN_1212920 | NM_009383.2    | TIAL1         | 0.42116816  |
| ILMN_2988191 | NM_029466.2    | ARL5B         | 0.421159394 |
| ILMN_1250814 | NM_029247.3    | 4930550C14RIK | 0.420858375 |
| ILMN_3135801 | NM_001037812.1 | ALS2CR4       | 0.420723137 |
| ILMN_1216382 | NM_007386.2    | ACO1          | 0.420655735 |
| ILMN_2916437 | NM_153793.1    | RELL2         | 0.42026961  |
| ILMN_2677332 | NM_178922.3    | HIC2          | 0.42026366  |
| ILMN_1248006 | XR_032943.1    | LOC100046500  | 0.420108424 |
| ILMN_1223090 | NM_201407.2    | DENND4B       | 0.420090307 |
| ILMN_2762956 | NM_025668.3    | SPCS2         | 0.41991557  |
| ILMN_2675760 | NM_027172.2    | 2310046K01RIK | 0.419791637 |
| ILMN_1218892 | NM_001081409.1 | PHF20L1       | 0.419766536 |
| ILMN_1227502 | NM_133836.1    | IL15RA        | 0.41974244  |
| ILMN_1213574 | NM_173443.2    | VCPIP1        | 0.419722609 |
| ILMN_2903889 | NM_207245.1    | BC066107      | 0.419436742 |
| ILMN_1222401 | NM_023524.1    | TFPT          | 0.419365543 |
| ILMN_1255611 |                | 2610024M03RIK | 0.419290855 |

|              |                |               |             |
|--------------|----------------|---------------|-------------|
| ILMN_2904658 | NM_011171.1    | PROCR         | 0.41920222  |
| ILMN_2536184 | XM_357292.1    | LOC383850     | 0.419059794 |
| ILMN_2627441 | NM_023324.2    | PELI1         | 0.418976002 |
| ILMN_2819859 | NM_194334.2    | TBC1D2B       | 0.418739995 |
| ILMN_2886896 | NM_028725.1    | 4632417N05RIK | 0.418578469 |
| ILMN_2614728 | NM_025826.3    | ACADSB        | 0.418539589 |
| ILMN_1226970 | NM_025830.3    | WWP2          | 0.418418585 |
| ILMN_2908065 | NM_013882.1    | GTSE1         | 0.418380724 |
| ILMN_2865335 | NM_028770.2    | KRT80         | 0.4183729   |
| ILMN_2494747 | NM_021523.4    | HUWE1         | 0.418347265 |
| ILMN_1218180 | NM_182927.2    | SPRED3        | 0.418316318 |
| ILMN_1213681 | NM_024179.4    | 0610009O20RIK | 0.418214691 |
| ILMN_2833378 | NM_008854.3    | PRKACA        | 0.418084632 |
| ILMN_2751587 | NM_010811.2    | NDST2         | 0.417963686 |
| ILMN_1216985 | NM_021448.2    | ELP2          | 0.417958518 |
| ILMN_2605767 | NM_001079904.1 | REPIN1        | 0.417821036 |
| ILMN_3160616 | NM_001004185.2 | WHDC1         | 0.417791288 |
| ILMN_2875812 | NM_012003.1    | COPS7A        | 0.417759738 |
| ILMN_2920200 | NM_175256.4    | HEG1          | 0.417541481 |
| ILMN_2676876 | NM_145630.2    | PDK3          | 0.417475111 |
| ILMN_2593662 | NM_026000.2    | PSMD9         | 0.417353365 |
| ILMN_2682321 | NM_133972.2    | ARMC6         | 0.417198385 |
| ILMN_2771201 |                | GALNS         | 0.417189517 |
| ILMN_2660328 | NM_178397.2    | UBXD8         | 0.416947822 |
| ILMN_1218042 | XM_357088.1    | LOC383483     | 0.416775869 |
| ILMN_2671438 | XM_137239.3    | PPP1R12A      | 0.416588961 |
| ILMN_3159720 | NM_028724.2    | RIN2          | 0.4165808   |
| ILMN_1237625 | NM_172293.3    | FAM113B       | 0.416341272 |
| ILMN_2649478 |                | 2310036D04RIK | 0.416225012 |
| ILMN_3162793 | NM_177244.3    | FASTKD1       | 0.416109485 |
| ILMN_2724585 | NM_010017.3    | DAG1          | 0.415887763 |
| ILMN_2813712 | NM_026203.1    | AHI1          | 0.415657888 |
| ILMN_2495644 | NM_019780.1    | VPS29         | 0.41565459  |
| ILMN_2660862 | NM_029100.2    | SEPN1         | 0.415307999 |
| ILMN_2855315 | NM_015786.1    | HIST1H1C      | 0.415293651 |
| ILMN_2710604 | NM_013810.2    | DBNL          | 0.41511729  |
| ILMN_1248347 | NM_028728.2    | NFAM1         | 0.415112903 |
| ILMN_2755424 | NM_178782.4    | BCORL1        | 0.415070475 |
| ILMN_1247915 | NM_197987.1    | TRIM37        | 0.414938426 |
| ILMN_2775360 |                | MAPKAPK3      | 0.414865691 |
| ILMN_1232208 | NM_019877.2    | COPZ2         | 0.414553023 |
| ILMN_2442140 |                | SNRPG         | 0.414504164 |
| ILMN_3003076 | NM_021531.2    | CARM1         | 0.414436757 |
| ILMN_2754561 | NM_183025.1    | A430033K04RIK | 0.414269253 |
| ILMN_1218078 | NM_001005506.2 | TXLNA         | 0.41406059  |
| ILMN_1252464 | NM_008793.1    | PCSK4         | 0.414032513 |

|              |                |               |             |
|--------------|----------------|---------------|-------------|
| ILMN_2662322 | NM_015766.2    | EBI3          | 0.413966377 |
| ILMN_2750515 | NM_010234.2    | FOS           | 0.413906992 |
| ILMN_2775016 |                | FZD6          | 0.413889776 |
| ILMN_2772515 | NM_016677.3    | HPCAL1        | 0.413722784 |
| ILMN_1237758 | XM_356249.1    | LOC382153     | 0.413592497 |
| ILMN_2727142 | XM_001476094.1 | LOC100046264  | 0.413423371 |
| ILMN_2484723 |                | 2410017P09RIK | 0.413303406 |
| ILMN_2479977 | XM_912979.2    | 2310040A07RIK | 0.413201194 |
| ILMN_2792924 | NM_029555.2    | GSTK1         | 0.412952596 |
| ILMN_1242246 | NM_020270.2    | SCAMP5        | 0.412867165 |
| ILMN_2630974 | NM_007691.4    | CHEK1         | 0.412814153 |
| ILMN_1222981 |                | 1700012K20RIK | 0.412634531 |
| ILMN_2946689 | NM_028639.1    | TTC7          | 0.412549254 |
| ILMN_3156782 | NM_172500.2    | 4831426I19RIK | 0.41239859  |
| ILMN_1227514 | NM_023292.3    | PUS3          | 0.41238831  |
| ILMN_2470764 |                | 4933424A20RIK | 0.412290496 |
| ILMN_2756176 | NM_172783.2    | PHKA2         | 0.412216623 |
| ILMN_2960308 | NM_008303.2    | HSPE1         | 0.412167347 |
| ILMN_2981665 | NM_028117.2    | CHST14        | 0.412130879 |
| ILMN_2657888 | XM_127336.2    | SECISBP2      | 0.41202685  |
| ILMN_2918032 | NM_025950.1    | CDC37L1       | 0.411986998 |
| ILMN_2725155 | NM_173753.3    | FNIP1         | 0.411974537 |
| ILMN_1220769 | NM_001013374.1 | LMAN2L        | 0.411950014 |
| ILMN_1244030 | NM_029090.3    | NAT15         | 0.411931396 |
| ILMN_1222970 | NM_007976.2    | F5            | 0.411852104 |
| ILMN_2878791 | NM_153099.1    | TESSP2        | 0.411817311 |
| ILMN_2630039 |                | E130014J05RIK | 0.411761705 |
| ILMN_2774537 |                | HIST1H1C      | 0.411746676 |
| ILMN_2800446 | NM_008298.2    | DNAJA1        | 0.411388017 |
| ILMN_2988849 | NM_172670.1    | GYLTL1B       | 0.411160261 |
| ILMN_2449817 |                | 2410022M11RIK | 0.411138377 |
| ILMN_2556850 |                | STX8          | 0.411084084 |
| ILMN_2594344 | NM_010890.3    | NEDD4         | 0.410753981 |
| ILMN_2804702 | NM_177475.2    | SUHW2         | 0.410720605 |
| ILMN_1246340 |                | 9330185J12RIK | 0.410719603 |
| ILMN_2596412 | NM_017477.1    | COPG          | 0.410714633 |
| ILMN_2683363 | NM_001003949.3 | ORF61         | 0.410713582 |
| ILMN_2677016 | NM_026987.1    | DHX16         | 0.410698269 |
| ILMN_1252356 | XM_125901.8    | CAND1         | 0.410656733 |
| ILMN_1232278 | NM_023418.2    | PGAM1         | 0.410349391 |
| ILMN_2641438 | NM_008244.2    | HGS           | 0.410296289 |
| ILMN_2584566 |                | 5430400L16RIK | 0.410197313 |
| ILMN_2684563 | NM_171826.2    | CLDND1        | 0.410131531 |
| ILMN_1221292 | NM_134006.4    | RDH5          | 0.410126173 |
| ILMN_2611284 | NM_010047.3    | DGCR6         | 0.409826968 |
| ILMN_1259621 | NM_024185.4    | 2310047O13RIK | 0.409796625 |

|              |                |               |             |
|--------------|----------------|---------------|-------------|
| ILMN_1248289 | NM_008669.3    | NAGA          | 0.409769718 |
| ILMN_2940541 | NM_001004144.1 | GIT1          | 0.409073813 |
| ILMN_2691261 | XM_128594.4    | NDUFB10       | 0.408751601 |
| ILMN_1251874 | NM_011181.2    | PSCD2         | 0.40872394  |
| ILMN_1249908 |                | 9030619K07RIK | 0.408487814 |
| ILMN_2920027 | NM_007886.1    | DTNB          | 0.408158652 |
| ILMN_2963634 | NM_138680.1    | LUC7L2        | 0.408082314 |
| ILMN_2775381 |                | TDE2          | 0.408047903 |
| ILMN_2882235 | NM_029522.1    | GPSM2         | 0.407924797 |
| ILMN_2420095 | NM_024189.5    | YAF2          | 0.407867956 |
| ILMN_2989469 | NM_010909.1    | NFKBIL1       | 0.40722788  |
| ILMN_2602821 | NM_025876.2    | CDK5RAP1      | 0.407213514 |
| ILMN_1246034 | NM_153160.3    | ZCCHC17       | 0.407119237 |
| ILMN_2445100 |                | SSH1          | 0.406947601 |
| ILMN_2966826 | NM_178869.2    | TTLL1         | 0.406946791 |
| ILMN_1239583 |                | WINS2         | 0.406673711 |
| ILMN_2512297 | NM_175130.3    | TRPM4         | 0.406665941 |
| ILMN_2705139 | NM_023884.3    | RALGPS2       | 0.406647179 |
| ILMN_2987854 | NM_134029.2    | NT5M          | 0.406631232 |
| ILMN_2780392 | NM_016972.2    | SLC7A8        | 0.406418294 |
| ILMN_2606198 | NM_175275.3    | CNTLN         | 0.406127962 |
| ILMN_1229985 | XM_922979.2    | EXOC6B        | 0.406076432 |
| ILMN_2517566 |                | 1110028F11RIK | 0.405988734 |
| ILMN_1219106 | NM_019662.1    | RRAD          | 0.405987126 |
| ILMN_2617425 | NM_019649.2    | CLPTM1        | 0.405653919 |
| ILMN_2770723 | NM_133762.3    | NCAPG2        | 0.405588552 |
| ILMN_2907655 | NM_007527.2    | BAX           | 0.40555785  |
| ILMN_2857947 | NM_178872.3    | TRIM36        | 0.405519067 |
| ILMN_2537123 | NM_028194.2    | FRYL          | 0.405432122 |
| ILMN_2687121 | NM_172573.1    | D230014K01RIK | 0.405422325 |
| ILMN_2771754 |                | FH1           | 0.405367714 |
| ILMN_1216042 | NM_009696.2    | APOE          | 0.405222835 |
| ILMN_2894751 | NM_021448.1    | STATIP1       | 0.40484283  |
| ILMN_2446990 |                | 1810037K07RIK | 0.404746598 |
| ILMN_1229266 | NM_001081166.1 | PHF21B        | 0.404642742 |
| ILMN_3124885 | NM_001080773.1 | PDPK1         | 0.404590737 |
| ILMN_1240630 | NM_012048.2    | POLK          | 0.404417303 |
| ILMN_1226069 | NM_026036.3    | CMTM6         | 0.404323675 |
| ILMN_2737758 | NM_011218.1    | PTPRS         | 0.404294078 |
| ILMN_3160863 | NM_026725.2    | DUSP23        | 0.404293664 |
| ILMN_1246312 | NM_026555.1    | RCN3          | 0.404288617 |
| ILMN_2703657 | NM_007861.3    | DLD           | 0.404171272 |
| ILMN_2733835 | NM_175190.3    | 2900010J23RIK | 0.404056395 |
| ILMN_2690232 | NM_207203.1    | BC068157      | 0.403983397 |
| ILMN_1212682 | XM_001475220.1 | LOC100045940  | 0.403879017 |
| ILMN_2749866 | NM_027088.1    | BAP1          | 0.403876531 |



|              |                |               |             |
|--------------|----------------|---------------|-------------|
| ILMN_1245615 | NM_025760.3    | PTPLAD2       | 0.403871185 |
| ILMN_2778094 | NM_025886.3    | RASSF7        | 0.403853242 |
| ILMN_1229359 | XR_034751.1    | LOC638034     | 0.403687285 |
| ILMN_2670352 | NM_029814.1    | CHMP5         | 0.403460515 |
| ILMN_1254335 | NM_033354.2    | SEC16B        | 0.403413094 |
| ILMN_2930922 | NM_029291.1    | ASCC2         | 0.403331815 |
| ILMN_2470238 |                | ZFP128        | 0.403168747 |
| ILMN_2865473 | NM_029025.1    | TMEM81        | 0.403088782 |
| ILMN_2612238 | NM_133829.1    | 2210010L05RIK | 0.403074453 |
| ILMN_1230730 | NM_013799.2    | ATE1          | 0.402989057 |
| ILMN_1255634 | NM_001082532.1 | PIGYL         | 0.402968593 |
| ILMN_1216211 | NM_025894.2    | PSMD12        | 0.402329376 |
| ILMN_2977210 | NM_144911.1    | RPAP2         | 0.402056184 |
| ILMN_1237959 |                | NISCH         | 0.402045189 |
| ILMN_1213001 | NM_145439.1    | TMC6          | 0.401965041 |
| ILMN_2747677 | NM_027093.3    | 2310003L22RIK | 0.401818336 |
| ILMN_1227131 | NM_053252.2    | EHBP1L1       | 0.401535388 |
| ILMN_1232925 |                | BC042423      | 0.401535181 |
| ILMN_2966632 | NM_025797.1    | CYB5          | 0.401484447 |
| ILMN_2760977 | NM_008378.2    | IMPACT        | 0.401455124 |
| ILMN_1255259 | NM_172943.3    | ALKBH5        | 0.401340711 |
| ILMN_2855998 | NM_013738.1    | PLEK2         | 0.401234932 |
| ILMN_1221742 | NM_199304.1    | ZFP341        | 0.401216216 |
| ILMN_1231062 | NM_001045536.1 | ZZEF1         | 0.401213413 |
| ILMN_2923671 | NM_001004154.1 | RRAGB         | 0.401146522 |
| ILMN_1219656 | NM_026938.1    | TMEM160       | 0.40098794  |
| ILMN_2500157 |                | 4733401I05RIK | 0.400912553 |
| ILMN_2764732 | NM_145978.1    | PDLIM2        | 0.400672502 |
| ILMN_2704395 | NM_175203.2    | 4833408A19RIK | 0.400628683 |
| ILMN_2700848 | NM_145429.4    | ARRB2         | 0.400428077 |
| ILMN_3007959 | NM_028986.1    | GZF1          | 0.400406098 |
| ILMN_2704637 | NM_175088.3    | MDFIC         | 0.400330745 |
| ILMN_2516348 | NM_016796.2    | VAMP4         | 0.400283074 |
| ILMN_1248563 | NM_009800.2    | CAR11         | 0.40023793  |
| ILMN_3007072 | NM_024427.2    | TPM1          | 0.400224191 |
| ILMN_1228479 |                | KREMEN        | 0.400046117 |
| ILMN_3160662 | NM_009712.3    | ARSB          | 0.399980576 |
| ILMN_1242903 | NM_008622.3    | MPV17         | 0.399926797 |
| ILMN_2500276 | NM_009831.2    | CCNG1         | 0.399904079 |
| ILMN_1220310 | NM_019706.2    | RNF138        | 0.399878287 |
| ILMN_2853957 | NM_010017.1    | DAG1          | 0.399829289 |
| ILMN_2607369 | NM_021313.1    | RNF25         | 0.399775757 |
| ILMN_2425415 | NM_054093.2    | UBE3B         | 0.399719082 |
| ILMN_1216143 | NM_013876.3    | RNF11         | 0.39925051  |
| ILMN_2626143 | NM_029293.2    | PHPT1         | 0.399229665 |
| ILMN_1239154 | NM_176958.3    | HIF1AN        | 0.399100245 |

|              |                |               |             |
|--------------|----------------|---------------|-------------|
| ILMN_1239494 | NM_019709.3    | MBTPS1        | 0.398925248 |
| ILMN_1233982 | XM_193524.2    | LOC270589     | 0.398821766 |
| ILMN_2496421 | NM_028875.2    | XRCC3         | 0.398743498 |
| ILMN_1256849 | NM_178048.3    | ST3GAL2       | 0.398737277 |
| ILMN_2894999 | NM_144893.1    | SLC35C2       | 0.398736177 |
| ILMN_2672458 | NM_010313.1    | GNB5          | 0.3986684   |
| ILMN_2879759 | NM_145968.1    | TAGAP         | 0.39855736  |
| ILMN_1248382 | XR_032055.1    | LOC100045864  | 0.398187459 |
| ILMN_2752552 | NM_011434.1    | SOD1          | 0.398106077 |
| ILMN_2597485 | NM_024229.2    | PCYT2         | 0.397968868 |
| ILMN_2983669 | NM_001035123.1 | SETD6         | 0.397934523 |
| ILMN_3154409 | NM_010238.3    | BRD2          | 0.397932173 |
| ILMN_3116014 | NM_001033314.1 | C530028I08RIK | 0.39786059  |
| ILMN_2517060 |                | 9630015D15RIK | 0.397838131 |
| ILMN_2845974 | NM_025542.1    | 2410001C21RIK | 0.397830184 |
| ILMN_2746924 | NM_138585.3    | CHERP         | 0.397752024 |
| ILMN_1235006 | NM_028122.3    | SLC14A1       | 0.396804274 |
| ILMN_1244292 | NM_011439.2    | SOX13         | 0.396697002 |
| ILMN_1216802 | NM_007522.2    | BAD           | 0.396465014 |
| ILMN_2927093 | NM_009546.1    | TRIM25        | 0.396208081 |
| ILMN_2682516 | NM_178398.4    | WIPI2         | 0.396204868 |
| ILMN_1241871 | NM_007688.2    | CFL2          | 0.396158894 |
| ILMN_2679456 | NM_007760.3    | CRAT          | 0.395836428 |
| ILMN_2884098 | NM_027352.2    | GORASP2       | 0.395761062 |
| ILMN_2944657 | NM_175172.2    | 4930506M07RIK | 0.395677916 |
| ILMN_1241088 | NM_153591.3    | NARS2         | 0.395631847 |
| ILMN_2637156 | NM_029330.2    | FPGT          | 0.395456505 |
| ILMN_1225132 | XM_131210.1    | 4930519L02RIK | 0.395368404 |
| ILMN_2833388 | NM_080469.2    | PRNPIP1       | 0.395316523 |
| ILMN_2685478 | NM_023697.1    | RDH14         | 0.395170676 |
| ILMN_1217235 | NM_026667.2    | 9130005N14RIK | 0.395166807 |
| ILMN_2908933 | NM_134111.2    | EAF2          | 0.395115335 |
| ILMN_2729706 | NM_024256.2    | B3GAT3        | 0.395092761 |
| ILMN_1221819 |                | FCGRT         | 0.3950663   |
| ILMN_2602837 | NM_018859.2    | AKR1E1        | 0.395025416 |
| ILMN_1213881 |                | 1110003P22RIK | 0.394984362 |
| ILMN_2829330 | NM_010422.1    | HEXB          | 0.394761911 |
| ILMN_2945275 | NM_001045807.1 | RBM15         | 0.394631181 |
| ILMN_1260033 | NM_026160.3    | MAP1LC3B      | 0.394180478 |
| ILMN_1229753 | NM_013636.3    | PPP1CC        | 0.394124899 |
| ILMN_3120797 | NM_178016.2    | PIGK          | 0.393918579 |
| ILMN_2750842 | NM_026403.2    | 2610027L16RIK | 0.393852841 |
| ILMN_2745849 | NM_178392.4    | SNAPC1        | 0.393790058 |
| ILMN_2910995 | NM_172952.1    | GPHN          | 0.39354243  |
| ILMN_1246725 | NM_080456.1    | MRPS6         | 0.393378303 |
| ILMN_1230019 | NM_023738.4    | UBE1L         | 0.393376597 |

|              |                |               |             |
|--------------|----------------|---------------|-------------|
| ILMN_1235687 | NM_138676.2    | SHKBP1        | 0.393312917 |
| ILMN_2840213 | NM_009964.1    | CRYAB         | 0.393295059 |
| ILMN_2421436 |                | D930050A07RIK | 0.393278181 |
| ILMN_3033533 | NM_001024458.1 | ADD1          | 0.393180379 |
| ILMN_1226514 | NM_153073.2    | GAB3          | 0.392924681 |
| ILMN_1242749 | NM_028027.2    | D10ERTD610E   | 0.392708087 |
| ILMN_2892904 | NM_025857.1    | 2310007F21RIK | 0.392637021 |
| ILMN_1217143 | NM_145442.1    | MBIP          | 0.392610367 |
| ILMN_2704177 | NM_021433.3    | STX6          | 0.392567862 |
| ILMN_1219080 | NM_198113.2    | SSH3          | 0.392553026 |
| ILMN_1221634 | NM_008306.4    | NDST1         | 0.392528078 |
| ILMN_1216559 | NM_025975.5    | DYNLT3        | 0.392490734 |
| ILMN_1255676 |                | A430106B04RIK | 0.392387646 |
| ILMN_1218495 | NM_027839.1    | CEACAM20      | 0.392282644 |
| ILMN_1246045 | NM_178916.4    | RFESD         | 0.392263422 |
| ILMN_2764588 | NM_008048.2    | IGFBP7        | 0.392054002 |
| ILMN_2976829 | NM_013506.1    | EIF4A2        | 0.392048101 |
| ILMN_2990420 | NM_172132.1    | JMJD2B        | 0.391981525 |
| ILMN_2935237 | NM_029338.1    | 1700027N10RIK | 0.391972018 |
| ILMN_2913845 | NM_153796.3    | PEO1          | 0.391964378 |
| ILMN_1235811 | NM_133187.2    | 1110032E23RIK | 0.391946104 |
| ILMN_2700765 | NM_001081218.1 | HCFC2         | 0.391870539 |
| ILMN_2936380 | NM_009163.2    | SGPL1         | 0.391519521 |
| ILMN_2674822 | NM_029810.3    | NT5C2         | 0.391483921 |
| ILMN_2865822 | NM_025898.1    | NAPA          | 0.391420188 |
| ILMN_1242893 | XM_356175.1    | ATR           | 0.391021397 |
| ILMN_2536518 | XM_357338.1    | LOC383942     | 0.39099219  |
| ILMN_2545063 |                | 5730552E08RIK | 0.390644423 |
| ILMN_2868482 | NM_138671.1    | NADK          | 0.390594002 |
| ILMN_2744758 | NM_001083317.1 | SLC35A4       | 0.390579808 |
| ILMN_2976191 | NM_011488.2    | STAT5A        | 0.390557593 |
| ILMN_1240346 | NM_019654.2    | SOCS5         | 0.390466576 |
| ILMN_1219853 |                | 4122402O22RIK | 0.390459943 |
| ILMN_2735792 | NM_011417.2    | SMARCA4       | 0.390395715 |
| ILMN_2723491 | NM_001039175.1 | ELOVL1        | 0.390352103 |
| ILMN_2813186 | NM_027106.1    | AVPI1         | 0.390309468 |
| ILMN_1222487 |                | ZPBP          | 0.390189342 |
| ILMN_1228942 | NM_007652.2    | CD59A         | 0.390178848 |
| ILMN_2949021 | NM_178772.2    | AADAACL1      | 0.390131712 |
| ILMN_2631218 | NM_177001.2    | 9130023H24RIK | 0.389984828 |
| ILMN_2919343 | NM_028844.1    | AVEN          | 0.389866012 |
| ILMN_1222962 |                | DIAP3         | 0.389802844 |
| ILMN_2665316 | NM_025570.2    | MRPL20        | 0.389764346 |
| ILMN_1218282 | NM_183270.1    | 5330414O08RIK | 0.389761773 |
| ILMN_1243678 | NM_207239.1    | GTF3C1        | 0.38975104  |
| ILMN_2828819 | NM_010716.2    | LIG3          | 0.389661459 |

|              |                |                |             |
|--------------|----------------|----------------|-------------|
| ILMN_1249991 | NM_032465.1    | CD96           | 0.389657596 |
| ILMN_2783403 | NM_011203.2    | PTPN12         | 0.389612294 |
| ILMN_1260064 | NM_019410.2    | PFN2           | 0.389606117 |
| ILMN_1257772 | NM_001081420.1 | BC026590       | 0.389413389 |
| ILMN_1234909 | NM_025372.3    | TIPIN          | 0.389406482 |
| ILMN_2998870 | NM_001001983.1 | PI4KA          | 0.389130531 |
| ILMN_2850753 | NM_010786.2    | MDM2           | 0.389033653 |
| ILMN_2970672 | NM_145425.2    | AV249152       | 0.388690244 |
| ILMN_2687391 | NM_146254.2    | WDR78          | 0.388630737 |
| ILMN_2638558 | NM_022889.3    | PES1           | 0.388464168 |
| ILMN_1224091 | NR_001463.2    | XIST           | 0.388453421 |
| ILMN_1254553 |                | POLE3          | 0.388364707 |
| ILMN_1223689 | NM_013651.3    | SF3A2          | 0.388345463 |
| ILMN_2709355 | NM_011989.3    | SLC27A4        | 0.388286199 |
| ILMN_1223768 |                | 4832412D13RIK  | 0.388208245 |
| ILMN_3034034 | NM_028527.1    | 1700047I17RIK1 | 0.388041738 |
| ILMN_1257509 |                | MKIAA1429      | 0.387990971 |
| ILMN_2581247 |                | E030007H10RIK  | 0.387823663 |
| ILMN_1259904 | NM_015769.1    | ERCC4          | 0.387769134 |
| ILMN_2449150 |                | MAP4K2         | 0.387589389 |
| ILMN_1220975 | NM_008979.1    | PTPN22         | 0.387566394 |
| ILMN_2772920 |                | FBXO4          | 0.387491876 |
| ILMN_1259564 | NM_019440.2    | IIGP2          | 0.387033569 |
| ILMN_1246887 |                | ANXA7          | 0.387029557 |
| ILMN_2651005 | NM_010155.2    | ERF            | 0.386944749 |
| ILMN_1248891 | NM_173863.2    | CRTC3          | 0.386892045 |
| ILMN_2643951 | NM_001033312.3 | FBXL18         | 0.386856816 |
| ILMN_2644161 | NM_178799.2    | 9330129D05RIK  | 0.386828438 |
| ILMN_3117483 | NM_009770.2    | BTG3           | 0.386801062 |
| ILMN_1260038 | NM_007917.3    | EIF4E          | 0.386363744 |
| ILMN_2699933 | NM_024236.1    | QDPR           | 0.38613759  |
| ILMN_2695662 | NM_007803.1    | CTTN           | 0.386080153 |
| ILMN_1238609 | NM_026274.3    | RSPRY1         | 0.386051358 |
| ILMN_1257759 | NM_144812.2    | TNRC6B         | 0.385827362 |
| ILMN_2993204 | NM_011104.1    | PRKCE          | 0.385772102 |
| ILMN_2790188 | NM_026604.3    | FAM135A        | 0.385763018 |
| ILMN_1244527 | NM_001081040.1 | COQ10A         | 0.385655552 |
| ILMN_1233363 | NM_153126.2    | NAT10          | 0.385595689 |
| ILMN_2660596 | NM_198620.1    | RUNDC3B        | 0.385440169 |
| ILMN_1260086 | XM_911987.3    | EG240110       | 0.385331261 |
| ILMN_1241168 | NM_053246.2    | DOK4           | 0.385288088 |
| ILMN_2455192 | NM_013844.2    | ZFP68          | 0.385102532 |
| ILMN_2970345 | NM_078484.1    | SLC35A2        | 0.38508462  |
| ILMN_2780454 | NM_029036.1    | S100PBP        | 0.385076457 |
| ILMN_2957605 | NM_053183.1    | DDX50          | 0.384979175 |
| ILMN_1217330 |                | GFM            | 0.384962986 |

|              |                |               |             |
|--------------|----------------|---------------|-------------|
| ILMN_1237987 |                | 8430415N23RIK | 0.384941587 |
| ILMN_2447483 |                | A630036P20RIK | 0.384911362 |
| ILMN_1260348 | NM_012058.2    | SRP9          | 0.384878855 |
| ILMN_2626114 | NM_001003950.2 | RAB3IP        | 0.384773081 |
| ILMN_2704715 | NM_025697.3    | 6330409N04RIK | 0.384691199 |
| ILMN_1228169 | XM_897323.2    | MAP3K10       | 0.384644808 |
| ILMN_1253798 |                | 4933407L23RIK | 0.384643422 |
| ILMN_1217344 | NM_177644.4    | RASAL2        | 0.384628574 |
| ILMN_1252015 |                | A630040J04RIK | 0.384527931 |
| ILMN_1219077 |                | AA536749      | 0.384445931 |
| ILMN_1220608 | XM_147789.1    | 1700081H05RIK | 0.384425793 |
| ILMN_2744435 | NM_008231.3    | HDGF          | 0.384381929 |
| ILMN_1224134 |                | D330050B18RIK | 0.384368496 |
| ILMN_3137920 | NM_001039089.1 | SEL1L         | 0.384165646 |
| ILMN_2434798 |                | C330005L02RIK | 0.384138427 |
| ILMN_2792268 | NM_054096.1    | TIRAP         | 0.38406283  |
| ILMN_2604688 | NM_007458.2    | AP2A1         | 0.3839893   |
| ILMN_2426833 | NM_146039.3    | WDR60         | 0.383971683 |
| ILMN_1218678 |                | COPS3         | 0.383632407 |
| ILMN_1246808 |                | SERPINE2      | 0.3835651   |
| ILMN_1256890 | NM_029931.2    | MLLT3         | 0.383517501 |
| ILMN_1240472 | NM_174874.3    | ATG4B         | 0.383387553 |
| ILMN_1241161 | XM_990809.1    | CAMK2N2       | 0.383344072 |
| ILMN_2487482 | NM_011764.2    | ZFP90         | 0.383240966 |
| ILMN_2599858 | NM_017463.2    | PBX2          | 0.383201    |
| ILMN_2667346 | NM_029688.4    | SRXN1         | 0.383160332 |
| ILMN_2504606 | XM_001477759.1 | LOC100047264  | 0.382918785 |
| ILMN_2811421 | NM_010768.1    | MATK          | 0.382708777 |
| ILMN_1219787 | NM_144833.2    | ZFP410        | 0.38239433  |
| ILMN_1229458 | NM_008855.1    | PRKCB         | 0.381480264 |
| ILMN_2597532 | NM_007471.1    | APP           | 0.381330497 |
| ILMN_3100812 | NM_001037741.2 | GPX4          | 0.381317458 |
| ILMN_2816876 | NM_008287.2    | HRSP12        | 0.381169359 |
| ILMN_3130983 | NM_021326.2    | RBAK          | 0.381124736 |
| ILMN_2695731 | NM_146236.1    | TCEAL1        | 0.380688315 |
| ILMN_1231387 | NM_001033243.2 | CCDC114       | 0.380601763 |
| ILMN_2978574 | NM_172697.1    | PRPF38A       | 0.380387012 |
| ILMN_1248840 | NM_053198.2    | SFXN4         | 0.380350276 |
| ILMN_2758120 | NM_008065.2    | GABPA         | 0.380344844 |
| ILMN_2799590 | NM_172607.2    | NAPRT1        | 0.380072022 |
| ILMN_1247646 | NM_198622.1    | H1FX          | 0.379833394 |
| ILMN_2470889 | NM_001082975.1 | 2310014G06RIK | 0.379817724 |
| ILMN_1227805 | NM_001081344.1 | STXBP5        | 0.379686301 |
| ILMN_2494061 | XM_001471743.1 | LOC100044170  | 0.379534005 |
| ILMN_2424299 | NM_013749.1    | TNFRSF12A     | 0.379416701 |
| ILMN_2974945 | NM_026225.1    | COG6          | 0.379411624 |

|              |                |               |             |
|--------------|----------------|---------------|-------------|
| ILMN_3103652 | NM_027874.2    | CSNK1D        | 0.379374571 |
| ILMN_1216391 | XM_917911.2    | 4930563E22RIK | 0.3793247   |
| ILMN_1232800 | NM_133769.2    | CYFIP2        | 0.379196403 |
| ILMN_2792601 | NM_175116.2    | P2RY5         | 0.37916535  |
| ILMN_1253838 | NM_054056.2    | PAWR          | 0.37914348  |
| ILMN_2962584 | NM_053082.2    | TSPAN4        | 0.37912624  |
| ILMN_2594539 |                | 6430590I03RIK | 0.378989693 |
| ILMN_2965991 | NM_026277.1    | NOB1          | 0.378918989 |
| ILMN_2718157 | NM_018864.4    | IMPA1         | 0.378891231 |
| ILMN_1258086 | NM_001040398.1 | SETD1B        | 0.378807676 |
| ILMN_2690256 | NM_133748.1    | INSIG2        | 0.37863901  |
| ILMN_2934534 | NM_134129.2    | PRPF19        | 0.378547623 |
| ILMN_2920008 | NM_019774.2    | AKAP8         | 0.378194706 |
| ILMN_1241991 | NM_033576.1    | PCDHGB4       | 0.378194559 |
| ILMN_2874104 | NM_007988.3    | FASN          | 0.378075723 |
| ILMN_1226275 | NM_175374.3    | MTRF1L        | 0.378032064 |
| ILMN_1258517 |                | GBE1          | 0.377973686 |
| ILMN_2639035 | NM_025555.3    | 2410004B18RIK | 0.377735089 |
| ILMN_1219002 | NM_023211.4    | USMG5         | 0.377527956 |
| ILMN_2672662 | NM_023229.2    | FASTK         | 0.377460121 |
| ILMN_2470799 | XM_001478437.1 | LOC100047579  | 0.377407336 |
| ILMN_1253434 | NM_172738.2    | 5730403M16RIK | 0.377240905 |
| ILMN_2790312 | NM_133895.1    | SLC15A4       | 0.377046668 |
| ILMN_2981689 | NM_172288.1    | NUP133        | 0.376993031 |
| ILMN_1251668 | NM_019660.3    | MYCBP         | 0.376940965 |
| ILMN_2622915 |                | SLC14A1       | 0.376671404 |
| ILMN_2614212 | NM_008551.1    | MAPKAPK2      | 0.376517423 |
| ILMN_1236649 |                | B130019G13RIK | 0.376479207 |
| ILMN_2731463 | XM_358314.1    | 2610301G19RIK | 0.376471176 |
| ILMN_1224455 |                | B930004C15RIK | 0.376469102 |
| ILMN_2629776 | NM_008793.1    | PCSK4         | 0.376418241 |
| ILMN_1214810 | NM_007477.4    | ARF2          | 0.376343904 |
| ILMN_2476804 | NM_019668.3    | UBE2A         | 0.376326753 |
| ILMN_2452883 |                | PEX11A        | 0.376254979 |
| ILMN_1218000 |                | A530020A01RIK | 0.376096869 |
| ILMN_3160203 | NM_001033496.2 | ZFP213        | 0.376043969 |
| ILMN_1231264 | NM_078478.3    | GHITM         | 0.376002289 |
| ILMN_2997379 | NM_028832.1    | MTERFD3       | 0.375876099 |
| ILMN_1216190 |                | RASA3         | 0.37579943  |
| ILMN_1254734 | NM_011885.3    | MRPS12        | 0.375786537 |
| ILMN_2420209 |                | 6430511F03    | 0.375673054 |
| ILMN_2745433 | NM_026170.3    | ERGIC1        | 0.375648298 |
| ILMN_1235834 | NM_024479.1    | WBSCR27       | 0.375442898 |
| ILMN_2698248 | NM_016810.3    | GOSR1         | 0.375288601 |
| ILMN_1251206 | NM_013771.4    | YME1L1        | 0.375274619 |
| ILMN_1222174 | XM_001476048.1 | NDUFA12L      | 0.375194318 |

|              |                |               |             |
|--------------|----------------|---------------|-------------|
| ILMN_2702141 | NM_019453.1    | MEFV          | 0.375148852 |
| ILMN_2870672 | NM_010180.1    | FBLN1         | 0.375114381 |
| ILMN_1249136 | XM_001479052.1 | LOC671641     | 0.375011022 |
| ILMN_2724779 | XM_903427.2    | LOC630302     | 0.374704378 |
| ILMN_1246720 | NM_008837.2    | PICK1         | 0.374624651 |
| ILMN_2995575 | NM_145376.3    | AYTL2         | 0.374576411 |
| ILMN_2621268 | NM_177468.2    | D7ERTD413E    | 0.374551406 |
| ILMN_1250063 | NM_009358.2    | PPP2R5D       | 0.374501904 |
| ILMN_3154581 | NM_023121.2    | GNGT2         | 0.374491073 |
| ILMN_2641956 | NM_008668.1    | NAB2          | 0.374459342 |
| ILMN_2834451 | NM_019742.2    | TUSC2         | 0.374316326 |
| ILMN_1241436 |                | E230014G11RIK | 0.374302378 |
| ILMN_2593188 | NM_152922.1    | EGFL8         | 0.374234812 |
| ILMN_1216781 | NM_001003955.2 | RAB11FIP5     | 0.374188737 |
| ILMN_2514776 | NM_053170.2    | TRIM33        | 0.374165205 |
| ILMN_1258158 | NM_134042.2    | ALDH6A1       | 0.374160875 |
| ILMN_2662316 | NM_177158.2    | 5830482F20RIK | 0.374127566 |
| ILMN_2947292 | NM_016693.3    | MAP3K6        | 0.374015246 |
| ILMN_1239411 | NM_176932.2    | 6430510M02RIK | 0.373913219 |
| ILMN_2911520 | NM_001001333.1 | HEXDC         | 0.373712482 |
| ILMN_2668236 | NM_015761.2    | DOS           | 0.373569287 |
| ILMN_2622001 | NM_138755.1    | PHF21A        | 0.373537785 |
| ILMN_1254341 | NM_009105.3    | RSU1          | 0.373427444 |
| ILMN_1219777 | NM_146191.3    | LRRK1         | 0.373426704 |
| ILMN_2922368 | NM_183318.1    | RGAG4         | 0.373356611 |
| ILMN_2777804 | NM_175251.2    | ARID2         | 0.373169724 |
| ILMN_1220023 | NR_003145.2    | SNHG10        | 0.373154419 |
| ILMN_1215096 | NM_007647.2    | ENTPD5        | 0.373067411 |
| ILMN_1238902 |                | B130066H02RIK | 0.373062489 |
| ILMN_2767227 | NM_025839.3    | NUDT16L1      | 0.372846861 |
| ILMN_2607022 | NM_008980.1    | PTPRA         | 0.37283226  |
| ILMN_2521686 | NM_172280.2    | 2210018M11RIK | 0.372719573 |
| ILMN_2613531 | XM_130033.5    | ARHGAP21      | 0.372653616 |
| ILMN_1231010 | XR_033733.1    | LOC664956     | 0.37255644  |
| ILMN_2771665 | NM_133880.1    | PAFAH2        | 0.372451016 |
| ILMN_1256412 | NM_011363.2    | SH2B1         | 0.372407046 |
| ILMN_3134301 | NM_145832.3    | SLC35C1       | 0.37238634  |
| ILMN_1214826 | XR_032424.1    | PGBD1         | 0.372367879 |
| ILMN_2752436 | XM_149712.5    | 2210010N04RIK | 0.372346174 |
| ILMN_1256927 | NM_178618.3    | 2310040C09RIK | 0.372307539 |
| ILMN_2424937 | NM_144925.3    | TNRC6A        | 0.372259105 |
| ILMN_2548435 |                | 4932433F15RIK | 0.372247259 |
| ILMN_2621909 | NM_027078.1    | 1700023M03RIK | 0.372192847 |
| ILMN_1249977 |                | B930059J09RIK | 0.372175604 |
| ILMN_2990616 | NM_007465.1    | BIRC2         | 0.372170167 |
| ILMN_2593410 | NM_008445.2    | KIF3C         | 0.372148006 |

|              |                |               |             |
|--------------|----------------|---------------|-------------|
| ILMN_2924243 | NM_008403.2    | ITGB1BP1      | 0.372128182 |
| ILMN_2881620 | NM_008685.2    | NFE2          | 0.37204161  |
| ILMN_2746000 | NM_172391.3    | AHSA2         | 0.371975436 |
| ILMN_2648376 | XM_001481214.1 | LOC100043906  | 0.371972752 |
| ILMN_2693677 | NM_133926.2    | CAMK1         | 0.371735219 |
| ILMN_2975295 | NM_001025573.1 | 2010107G12RIK | 0.371628833 |
| ILMN_1221822 | NM_170598.2    | RBM12         | 0.371615985 |
| ILMN_2755399 |                | PPP2R4        | 0.371598548 |
| ILMN_2755215 | NM_172958.3    | MTMR12        | 0.371586779 |
| ILMN_2976188 | NM_011488.2    | STAT5A        | 0.37157393  |
| ILMN_2688888 | NM_145523.3    | GCA           | 0.371293449 |
| ILMN_2958016 | NM_028058.1    | FUNDC1        | 0.371252215 |
| ILMN_2589433 | NM_026259.2    | RNF41         | 0.371179944 |
| ILMN_1220132 | NM_172550.4    | A130042E20RIK | 0.371148131 |
| ILMN_3009738 | NM_026451.1    | 1600012H06RIK | 0.370896369 |
| ILMN_2877835 | NM_177391.2    | C920005C14RIK | 0.370868369 |
| ILMN_3096468 | NM_001081462.1 | GTF2IRD1      | 0.370773384 |
| ILMN_1213816 | XM_001471965.1 | PPP2R3A       | 0.37073621  |
| ILMN_1219208 | NM_139236.3    | NOL6          | 0.370669592 |
| ILMN_1255342 | NM_011176.4    | ST14          | 0.370638277 |
| ILMN_2944601 | NM_001004146.1 | 4933439C20RIK | 0.370576745 |
| ILMN_3149143 | NM_001026214.1 | ENTPD5        | 0.370571824 |
| ILMN_1247117 | NM_177693.3    | LIM2          | 0.370533902 |
| ILMN_2755621 | NM_177318.2    | ZFP653        | 0.370530368 |
| ILMN_2616274 | NM_199322.1    | DOT1L         | 0.37048599  |
| ILMN_1224846 | NM_153785.3    | CDKL3         | 0.37047451  |
| ILMN_2889044 | NM_138582.1    | D17H6S56E-3   | 0.370412127 |
| ILMN_3112011 | NM_130447.2    | DUSP16        | 0.370354118 |
| ILMN_2913069 | NM_178932.1    | AOC2          | 0.369954518 |
| ILMN_2602607 | NM_024461.2    | 1810037I17RIK | 0.369936476 |
| ILMN_2524251 | XM_001474897.1 | TNIK          | 0.369827317 |
| ILMN_1247096 |                | AGL           | 0.369727761 |
| ILMN_2677696 | NM_013852.2    | ABCF3         | 0.369679995 |
| ILMN_2586958 |                | 9530095N04RIK | 0.369611552 |
| ILMN_2893081 | NM_013594.1    | MBD1          | 0.369564202 |
| ILMN_1258728 | NM_028048.2    | SLC25A35      | 0.369535214 |
| ILMN_2599402 | NM_011599.3    | TLE1          | 0.369496128 |
| ILMN_2720807 | NM_001081105.1 | RHOH          | 0.36940323  |
| ILMN_1252431 | NM_001033174.1 | OSBP          | 0.369340065 |
| ILMN_2540127 | XM_358209.1    | LOC385368     | 0.369289959 |
| ILMN_2588199 | NM_173757.3    | MRPS27        | 0.369257159 |
| ILMN_2803399 | NM_008567.1    | MCM6          | 0.369210253 |
| ILMN_2693858 | NM_025311.1    | D14ERTD449E   | 0.369166246 |
| ILMN_2495446 |                | 0610037M15RIK | 0.368893692 |
| ILMN_1221129 | NM_172572.2    | RHBDF2        | 0.368524734 |
| ILMN_1253189 | XM_001480001.1 | 2610014I16RIK | 0.368460583 |



|              |                |               |             |
|--------------|----------------|---------------|-------------|
| ILMN_2881155 | NM_001033416.1 | GAL3ST4       | 0.368435428 |
| ILMN_2717678 | NM_010739.1    | MUC13         | 0.368345371 |
| ILMN_2627081 | NM_015789.2    | DKKL1         | 0.368326182 |
| ILMN_2479681 | NM_001029890.1 | MEX3A         | 0.368317129 |
| ILMN_2823269 | NM_022980.3    | DSCR1L2       | 0.368290728 |
| ILMN_2654296 | NM_016676.4    | RAB10         | 0.36828457  |
| ILMN_2985305 | NM_198420.1    | D15WSU169E    | 0.368221021 |
| ILMN_1249301 | NM_009739.3    | BCKDK         | 0.368208651 |
| ILMN_1216688 | NM_010390.2    | H2-Q1         | 0.368196824 |
| ILMN_2512206 | NM_021539.4    | WSB2          | 0.368109158 |
| ILMN_2546510 | XM_001479948.1 | EG434402      | 0.368034219 |
| ILMN_1242540 | NM_001081264.1 | ALG6          | 0.368030679 |
| ILMN_1240178 | NM_010761.2    | CCNDBP1       | 0.367968643 |
| ILMN_2692244 | NM_001081053.1 | ITGA10        | 0.367812098 |
| ILMN_1218358 | NM_001048207.1 | GYPC          | 0.36781093  |
| ILMN_2640944 | NM_010887.1    | NDUFS4        | 0.367777363 |
| ILMN_2518197 | NM_031880.2    | TNK1          | 0.367709614 |
| ILMN_2972372 | NM_019458.2    | PAF1          | 0.367535613 |
| ILMN_1259668 | NM_001033297.2 | GM561         | 0.367167824 |
| ILMN_2466021 |                | HIVEP3        | 0.366741475 |
| ILMN_2476341 |                | 2310051F07RIK | 0.366687942 |
| ILMN_2907560 | NM_008057.2    | FZD7          | 0.366512549 |
| ILMN_2844153 | NM_199149.1    | BC024868      | 0.366352606 |
| ILMN_2798797 | NM_026313.1    | 3300001P08RIK | 0.366269497 |
| ILMN_2964511 | NM_026850.2    | PDCL3         | 0.366213563 |
| ILMN_1232969 | NM_026396.3    | BXDC2         | 0.366204344 |
| ILMN_2753057 | NM_025314.1    | DTD1          | 0.365980484 |
| ILMN_2776283 |                | TCEA3         | 0.365929353 |
| ILMN_1255927 | NM_001044383.1 | UBTF          | 0.365859392 |
| ILMN_2907928 | NM_134034.1    | SMEK2         | 0.365747917 |
| ILMN_1217254 | NM_181415.3    | ATRNL1        | 0.365393516 |
| ILMN_2650317 | NM_028767.1    | FOXP4         | 0.365293534 |
| ILMN_1250469 | NM_030256.1    | BCL9L         | 0.365264533 |
| ILMN_2646369 | NM_022411.3    | SLC13A2       | 0.364759315 |
| ILMN_2435891 | NM_017467.2    | ZFP316        | 0.364744087 |
| ILMN_2707015 | NM_027985.2    | MAD2L2        | 0.364643679 |
| ILMN_1244649 | NM_026999.2    | ZFP688        | 0.364605655 |
| ILMN_2620336 | NM_022327.4    | RALB          | 0.364516233 |
| ILMN_3127381 | NM_008616.2    | ZFP239        | 0.364475672 |
| ILMN_3087187 | NM_001044705.1 | ZSCAN21       | 0.364411145 |
| ILMN_2540103 | XR_031145.1    | LOC666559     | 0.364195357 |
| ILMN_2890357 | NM_172145.2    | 2610027C15RIK | 0.364124772 |
| ILMN_2996046 | NM_032460.1    | BAT4          | 0.364122121 |
| ILMN_2836023 | NM_016665.1    | STRA13        | 0.364119763 |
| ILMN_1212639 |                | 2310045L10RIK | 0.364063824 |
| ILMN_2422834 | NM_177073.5    | RELT          | 0.363994049 |

|              |                |               |             |
|--------------|----------------|---------------|-------------|
| ILMN_1251934 |                | AZI2          | 0.363884175 |
| ILMN_1242542 | NM_177186.4    | A530082C11RIK | 0.363880773 |
| ILMN_1223591 | NM_030713.1    | ZFP202        | 0.363856212 |
| ILMN_2790241 | NM_022331.1    | HERPUD1       | 0.363705367 |
| ILMN_2655025 |                | BC026996      | 0.36352319  |
| ILMN_2620930 | NM_015735.1    | DDB1          | 0.363502764 |
| ILMN_2933426 | NM_019873.2    | FKBPL         | 0.363424211 |
| ILMN_2618302 | NM_010451.1    | HOXA2         | 0.363396779 |
| ILMN_2623184 | NM_028024.2    | NKIRAS2       | 0.363355735 |
| ILMN_3163504 | NM_176917.4    | METTL4        | 0.363354734 |
| ILMN_1246380 |                | RECQL         | 0.363332098 |
| ILMN_1245338 | NM_146001.1    | HIP1          | 0.363036996 |
| ILMN_2775098 | NM_025797.3    | CYB5          | 0.362776814 |
| ILMN_2908056 | NM_027154.3    | TMBIM1        | 0.362694746 |
| ILMN_2599145 | XM_001471713.1 | LOC100044159  | 0.362672423 |
| ILMN_2911936 | NM_011585.3    | TIA1          | 0.362460889 |
| ILMN_1243890 | NM_130454.1    | RECQL5        | 0.362452452 |
| ILMN_2878071 | NM_013590.2    | LYZ           | 0.362094687 |
| ILMN_2765936 | NM_175392.3    | 5730472N09RIK | 0.361723086 |
| ILMN_1214645 | NM_054096.1    | TIRAP         | 0.361580664 |
| ILMN_2690968 | NM_175226.3    | RNF139        | 0.361571051 |
| ILMN_1219450 | NM_138589.2    | UBFD1         | 0.361568903 |
| ILMN_2548550 |                | 4933432B13RIK | 0.361563247 |
| ILMN_1236059 | NM_011487.3    | STAT4         | 0.361526434 |
| ILMN_2681733 | NM_029849.2    | 4632433K11RIK | 0.361334186 |
| ILMN_2653842 | NM_175411.4    | FAM118B       | 0.361223278 |
| ILMN_1231601 | NM_177729.2    | 4930477M19    | 0.360954441 |
| ILMN_2678502 | NM_133993.2    | PWP1          | 0.360863102 |
| ILMN_2629112 | NM_139306.1    | ASAH3L        | 0.360822676 |
| ILMN_2669869 | NM_011699.3    | LIN7C         | 0.36057872  |
| ILMN_2761994 | NM_175648.2    | A530023O14RIK | 0.360405385 |
| ILMN_2769153 |                | 4930455F23RIK | 0.360303751 |
| ILMN_1242391 | NM_021793.1    | TMEM8         | 0.360042649 |
| ILMN_1219661 | NM_026225.2    | COG6          | 0.359981068 |
| ILMN_2662264 | NM_029815.1    | BCAS1         | 0.359980142 |
| ILMN_2728830 | NM_025444.2    | TAF13         | 0.359852007 |
| ILMN_2793503 | NM_019562.1    | UCHL5         | 0.359693822 |
| ILMN_1216265 | NM_001081300.1 | TSHZ1         | 0.359678945 |
| ILMN_2953301 | NM_007460.1    | AP3D1         | 0.359397491 |
| ILMN_1235150 | XM_358652.1    | LOC381787     | 0.359363766 |
| ILMN_2894057 | NM_027323.1    | SRRD          | 0.35910008  |
| ILMN_1246221 | NM_177088.2    | CCDC45        | 0.358887563 |
| ILMN_2541629 | XM_358707.1    | LOC382114     | 0.358876947 |
| ILMN_1242334 | XM_001479510.1 | 0610040B10RIK | 0.358716946 |
| ILMN_2861493 | NM_025703.2    | TCEAL8        | 0.358702726 |
| ILMN_1222351 |                | 6330403M23RIK | 0.358613629 |

|              |                |               |             |
|--------------|----------------|---------------|-------------|
| ILMN_3009735 | NM_026451.1    | 1600012H06RIK | 0.358247005 |
| ILMN_2814431 | NM_025736.1    | TTC35         | 0.358224336 |
| ILMN_1238984 | NM_029851.2    | DYNC2H1       | 0.358077804 |
| ILMN_3001043 | NM_010790.2    | MELK          | 0.35801744  |
| ILMN_2820297 | NM_028811.1    | ELP3          | 0.357992104 |
| ILMN_1213331 | NM_001081378.1 | C330002I19RIK | 0.3579316   |
| ILMN_2590729 | NM_008445.2    | KIF3C         | 0.357850302 |
| ILMN_2475864 |                | UBP1          | 0.357702142 |
| ILMN_1250531 | NM_054087.2    | SLC19A2       | 0.357445074 |
| ILMN_1222069 |                | BBX           | 0.357350728 |
| ILMN_2797594 | NM_019574.2    | PATZ1         | 0.357320332 |
| ILMN_2867771 | NM_007601.1    | CAPN3         | 0.357302353 |
| ILMN_2700430 | NM_001081383.1 | MLL3          | 0.357295871 |
| ILMN_2779746 | NM_012058.2    | SRP9          | 0.357292417 |
| ILMN_2749471 | NM_016893.4    | FUT8          | 0.357180635 |
| ILMN_2562146 |                | A730021C13RIK | 0.356796864 |
| ILMN_2463979 | NM_023053.2    | TWSG1         | 0.35674682  |
| ILMN_3004553 | NM_021514.2    | PFKM          | 0.356738367 |
| ILMN_2433990 | XM_001480051.1 | LOC100048346  | 0.356668131 |
| ILMN_1225386 | XM_898537.2    | 2300009A05RIK | 0.35665045  |
| ILMN_3062654 | NM_001025426.1 | DEPDC5        | 0.356631026 |
| ILMN_3099633 | NM_001081359.1 | UBR5          | 0.356545441 |
| ILMN_2939882 | NM_007740.2    | COL9A1        | 0.356451279 |
| ILMN_3147584 | NM_021890.3    | FADS3         | 0.356406977 |
| ILMN_1224755 | NM_023045.2    | XPO7          | 0.356143948 |
| ILMN_2982652 | NM_015751.2    | ABCE1         | 0.356064432 |
| ILMN_1229630 | NM_009099.2    | TRIM30        | 0.356060138 |
| ILMN_2652909 | NM_007837.2    | DDIT3         | 0.356001667 |
| ILMN_2858399 | NM_173397.2    | D930001I22RIK | 0.355908495 |
| ILMN_3163419 | NM_001013829.2 | SHF           | 0.355882163 |
| ILMN_2911454 | NM_145412.3    | 5830457O10RIK | 0.355736252 |
| ILMN_2749737 | NM_031843.2    | DPP7          | 0.355641448 |
| ILMN_2619671 | NM_025440.2    | MRPS16        | 0.355527538 |
| ILMN_1249930 |                | ATP6V0A2      | 0.355489875 |
| ILMN_3051608 | NM_026013.2    | TMEM77        | 0.355401386 |
| ILMN_2743593 | NM_175446.3    | ZMAT1         | 0.355383858 |
| ILMN_1230377 |                | E430024E16RIK | 0.355202547 |
| ILMN_3029489 | NM_001033302.1 | GM129         | 0.355201139 |
| ILMN_2574633 |                | B430201C15RIK | 0.355028088 |
| ILMN_2914036 | NM_001024726.2 | ZFP607        | 0.355016788 |
| ILMN_1252919 | NM_025828.3    | LMAN2         | 0.354994126 |
| ILMN_1218057 | NM_017467.2    | ZFP316        | 0.354938291 |
| ILMN_2469333 | NM_011609.2    | TNFRSF1A      | 0.354822694 |
| ILMN_2859440 | NM_029797.1    | MND1          | 0.354816399 |
| ILMN_1258578 | NM_001039959.1 | AHNAK         | 0.35475117  |
| ILMN_2460491 | XM_992396.1    | SLC39A9       | 0.354745209 |

|              |                |               |             |
|--------------|----------------|---------------|-------------|
| ILMN_2734340 | XM_001472888.1 | STX11         | 0.354726184 |
| ILMN_1260027 |                | ARPC4         | 0.354596634 |
| ILMN_2945551 | NM_023587.2    | PTPLB         | 0.354500795 |
| ILMN_2961626 | NM_025790.1    | THEM2         | 0.354470533 |
| ILMN_1217786 | NM_029495.1    | EPSTI1        | 0.354455848 |
| ILMN_3135697 | NM_181274.3    | 1200003I07RIK | 0.354357228 |
| ILMN_2488835 |                | EPB4.1L2      | 0.354100279 |
| ILMN_2490252 |                | SPRED1        | 0.354053442 |
| ILMN_1245031 | NM_026550.2    | PAK1IP1       | 0.353757144 |
| ILMN_2615864 | XM_356222.1    | PHTF1         | 0.353621298 |
| ILMN_2751037 | XM_147847.4    | SPATA13       | 0.353604108 |
| ILMN_2720429 | NM_016915.3    | PLA2G6        | 0.353562245 |
| ILMN_2950503 | NM_001001602.1 | DAB2IP        | 0.35353821  |
| ILMN_1220446 | NM_181413.3    | ANKS1         | 0.353516121 |
| ILMN_2668455 | NM_172842.2    | LAX1          | 0.353495039 |
| ILMN_2627072 | NM_053180.2    | CCRK          | 0.353379792 |
| ILMN_1254390 | NM_001039967.1 | 1200003I07RIK | 0.353178966 |
| ILMN_1231840 | NM_001039386.1 | NELF          | 0.353023443 |
| ILMN_1249137 | NM_134044.2    | AI413782      | 0.353009671 |
| ILMN_1236600 |                | ITGA6         | 0.352715457 |
| ILMN_1237090 | NM_019877.2    | COPZ2         | 0.352608316 |
| ILMN_2725719 | XR_035307.1    | AI854703      | 0.352573087 |
| ILMN_1215885 | NM_029019.3    | STARD6        | 0.352484374 |
| ILMN_2676533 | NM_145223.2    | ALMS1         | 0.352468551 |
| ILMN_1225014 | NM_172774.2    | 6620401K05RIK | 0.352439628 |
| ILMN_2657009 | XM_001475732.1 | LOC100046143  | 0.352246618 |
| ILMN_1226126 | NM_177648.3    | DOLK          | 0.352230652 |
| ILMN_2744414 | NM_019730.1    | NME3          | 0.352069458 |
| ILMN_2588601 | NM_010885.4    | NDUFA2        | 0.352059164 |
| ILMN_1230395 | NM_027909.2    | C2CD2L        | 0.351980248 |
| ILMN_1219701 | NM_009423.3    | TRAF4         | 0.351529461 |
| ILMN_2654443 | XM_925142.3    | 1300018I17RIK | 0.35152839  |
| ILMN_2959272 | NR_003027.1    | RNU6          | 0.351490671 |
| ILMN_1233613 | NM_028315.2    | DIS3          | 0.351395592 |
| ILMN_1243763 |                | B230349N02RIK | 0.351318615 |
| ILMN_1214875 |                | RPS24         | 0.351265332 |
| ILMN_1244991 | NM_145564.3    | FBXO21        | 0.351262643 |
| ILMN_2871881 | NM_025650.2    | UQCR          | 0.35120632  |
| ILMN_1223832 | XM_001479242.1 | LOC100047833  | 0.35106499  |
| ILMN_2828438 | NM_178264.3    | D830050J10RIK | 0.350969029 |
| ILMN_2504433 | NM_011631.1    | HSP90B1       | 0.350883058 |
| ILMN_1229981 |                | 1700073K01RIK | 0.350881332 |
| ILMN_2530621 | XM_148771.1    | LOC224628     | 0.350754095 |
| ILMN_2577286 |                | D330012P07RIK | 0.350740373 |
| ILMN_1251595 | NM_198161.1    | BHLHB9        | 0.350660202 |
| ILMN_2901626 | NM_178589.2    | TNFRSF21      | 0.350568028 |

|              |                |               |             |
|--------------|----------------|---------------|-------------|
| ILMN_2682503 | NM_015828.2    | GENE          | 0.350509495 |
| ILMN_2620603 | NM_177009.3    | SMYD4         | 0.350497716 |
| ILMN_2747623 | NM_172546.2    | CNKSR3        | 0.350453586 |
| ILMN_1216813 | NM_027093.3    | 2310003L22RIK | 0.350385568 |
| ILMN_2831268 | NM_178746.3    | SLC38A9       | 0.350213875 |
| ILMN_3009521 | NM_001017983.1 | FOXRED2       | 0.349798044 |
| ILMN_1239592 | NM_173426.2    | FAM110B       | 0.349692335 |
| ILMN_2548883 |                | 4930406P12RIK | 0.34962947  |
| ILMN_2616638 | NM_028043.2    | D1BWG0212E    | 0.349490782 |
| ILMN_2650998 | NM_010155.2    | ERF           | 0.34944906  |
| ILMN_2661287 | NM_007431.1    | AKP2          | 0.34936004  |
| ILMN_3076424 | NM_008909.2    | PPL           | 0.349224084 |
| ILMN_1242435 | NM_178746.3    | SLC38A9       | 0.34917486  |
| ILMN_1230396 | NM_178404.2    | ZC3H6         | 0.349103301 |
| ILMN_1231670 | NM_177140.2    | D230037D09RIK | 0.349102807 |
| ILMN_2566052 |                | C130020C07RIK | 0.349032454 |
| ILMN_1215803 | NM_027052.3    | SLC38A4       | 0.349003809 |
| ILMN_2600928 | NM_007696.2    | OVGP1         | 0.348799679 |
| ILMN_2555935 |                | 1810047K05RIK | 0.348693119 |
| ILMN_2736071 | XM_001476827.1 | LOC100046796  | 0.348678964 |
| ILMN_1256988 |                | 4933401B08RIK | 0.348595206 |
| ILMN_2609056 | NM_153178.2    | EIF2C2        | 0.348520184 |
| ILMN_3099751 | NM_001077638.1 | PRMT2         | 0.34819901  |
| ILMN_1237156 | XM_910661.2    | LOC626259     | 0.348177964 |
| ILMN_1245924 | NM_007746.2    | MAP3K8        | 0.347966185 |
| ILMN_1249277 | XM_888711.3    | MYEOV2        | 0.347942559 |
| ILMN_1251951 |                | A930011E24RIK | 0.347853201 |
| ILMN_2904979 | NM_144858.1    | DUS3L         | 0.347585397 |
| ILMN_1258993 | NM_145573.2    | MRPS35        | 0.347442993 |
| ILMN_1216098 | XM_904306.3    | ZFP746        | 0.34742611  |
| ILMN_2768850 | NM_144802.3    | HNRPLL        | 0.347425325 |
| ILMN_2475271 | NM_025701.3    | TRAPPC5       | 0.347336884 |
| ILMN_2497526 | XM_001052064.2 | LOC674195     | 0.347262233 |
| ILMN_1212626 | XM_982986.2    | EG665509      | 0.346997431 |
| ILMN_2977690 | NM_133847.3    | TM9SF4        | 0.34693804  |
| ILMN_1241333 | NM_028454.2    | TM7SF2        | 0.346876724 |
| ILMN_2650578 | NM_028056.1    | 1600002H07RIK | 0.346720742 |
| ILMN_2517138 |                | D15ERTD528E   | 0.346714075 |
| ILMN_2746456 | NM_016921.2    | TCIRG1        | 0.346654918 |
| ILMN_2769811 |                | 2810046L04RIK | 0.346606861 |
| ILMN_3121578 | NM_001004364.1 | DDEF2         | 0.345967062 |
| ILMN_1229286 | NM_024254.2    | 2410042D21RIK | 0.345425081 |
| ILMN_2536553 | XM_356814.1    | LOC383036     | 0.345416248 |
| ILMN_2901903 | NM_008838.1    | PIGF          | 0.345369361 |
| ILMN_1259554 | XR_035422.1    | MARVELD1      | 0.345364849 |
| ILMN_1244312 | XM_137003.2    | LOC212399     | 0.345284951 |

|              |             |               |             |
|--------------|-------------|---------------|-------------|
| ILMN_1216617 |             | C430014K11RIK | 0.3451023   |
| ILMN_2656440 | NM_028105.3 | ADCK1         | 0.345036018 |
| ILMN_2843548 | NM_134078.2 | CHMP7         | 0.344937284 |
| ILMN_2628744 | NM_172282.1 | B230339H12RIK | 0.344678089 |
| ILMN_2759792 | XM_203577.2 | 2310079P12RIK | 0.34465864  |
| ILMN_2900827 | NM_133772.1 | SSBP4         | 0.344477519 |
| ILMN_2458545 |             | A930019L04RIK | 0.344307027 |
| ILMN_2860725 | NM_153775.1 | 2310061F22RIK | 0.34428327  |
| ILMN_2533459 | XM_134917.5 | LOC235497     | 0.344147327 |
| ILMN_1232517 |             | HELZ          | 0.343907675 |
| ILMN_3071356 | NM_007830.3 | DBI           | 0.343426445 |
| ILMN_1226726 |             | TPMT          | 0.343394838 |
| ILMN_2910295 | NM_015800.2 | CRIM1         | 0.343319672 |
| ILMN_2747430 | NM_009726.3 | ATP7A         | 0.343314618 |
| ILMN_2628745 | NM_172282.2 | TMCO3         | 0.343281739 |
| ILMN_1255514 |             | IL18R1        | 0.34323411  |
| ILMN_2687974 |             | BC008150      | 0.343011198 |
| ILMN_1252615 |             | E330023A07RIK | 0.342939531 |
| ILMN_1252481 | NM_008037.3 | FOSL2         | 0.342918497 |
| ILMN_2759598 | NM_026871.1 | HINT2         | 0.342887905 |
| ILMN_1222383 | XR_034387.1 | LOC100048083  | 0.342721394 |
| ILMN_3128907 | NM_007653.3 | CD63          | 0.342634646 |
| ILMN_1218452 |             | ES2EL         | 0.342536521 |
| ILMN_1243615 | NM_172611.2 | GRAMD4        | 0.342262455 |
| ILMN_2647820 | NM_009695.2 | APOC2         | 0.34215223  |
| ILMN_3108328 | NM_175933.2 | PEX5          | 0.342074571 |
| ILMN_2689908 | NM_019657.2 | HSD17B12      | 0.341882799 |
| ILMN_2500700 | NM_008997.3 | RAB11B        | 0.34180903  |
| ILMN_2455397 |             | 1110021J02RIK | 0.341788884 |
| ILMN_2653444 | XM_920610.2 | 3200001K10RIK | 0.341650545 |
| ILMN_2802611 | NM_080556.2 | TM9SF2        | 0.341452285 |
| ILMN_2784957 | NM_178398.2 | WIPI2         | 0.341405476 |
| ILMN_1212646 | NM_016683.1 | ZKSCAN5       | 0.341387137 |
| ILMN_1235131 | NM_172670.1 | GYLTL1B       | 0.341301792 |
| ILMN_2650049 | NM_009293.1 | STS           | 0.341263315 |
| ILMN_2649435 | NM_175676.2 | 6720487G11RIK | 0.341169846 |
| ILMN_3003631 | NM_015817.2 | PPAP2C        | 0.341155698 |
| ILMN_2458986 |             | BZW1          | 0.34105687  |
| ILMN_2481541 | XM_994766.1 | PPIL6         | 0.340933587 |
| ILMN_3090123 | NM_172256.1 | DYNC2LI1      | 0.340895454 |
| ILMN_2721439 | NM_007792.3 | CSRP2         | 0.340854595 |
| ILMN_1233679 | NM_011752.2 | ZFP259        | 0.340848453 |
| ILMN_2596979 | NM_025980.2 | NRARP         | 0.340838705 |
| ILMN_2679662 | NM_030245.2 | TADA1L        | 0.340739241 |
| ILMN_2702016 | NM_025912.3 | 2010011I20RIK | 0.340615033 |
| ILMN_2945607 | NM_011753.1 | ZFP26         | 0.340402279 |

|              |                |               |             |
|--------------|----------------|---------------|-------------|
| ILMN_1214859 | NM_173738.2    | BC027344      | 0.340363406 |
| ILMN_2501071 |                | NDUFB8        | 0.340133523 |
| ILMN_2847136 | NM_023229.2    | FASTK         | 0.340066918 |
| ILMN_1229993 | NM_013888.2    | DNAJC12       | 0.34001627  |
| ILMN_1220545 | NM_133250.1    | MUTYH         | 0.340000876 |
| ILMN_2693645 | NM_027561.2    | 4632415L05RIK | 0.339948471 |
| ILMN_1221257 | XM_129546.2    | BC026585      | 0.339880815 |
| ILMN_1253625 | XM_001475830.1 | LOC100046343  | 0.339600779 |
| ILMN_2776419 |                | DNCLC1        | 0.33959533  |
| ILMN_1214290 |                | 2210008N01RIK | 0.339576412 |
| ILMN_1235592 | NM_011549.2    | TCFEB         | 0.339543453 |
| ILMN_2638721 | NM_153407.2    | CSRNP2        | 0.339456446 |
| ILMN_2895991 | NM_027430.1    | BRP44         | 0.339429148 |
| ILMN_1222844 | NM_001081017.1 | 9030205A07RIK | 0.339401924 |
| ILMN_1251257 | NM_018828.2    | FNBP4         | 0.339311733 |
| ILMN_1216485 |                | A930039H18RIK | 0.339296941 |
| ILMN_2739250 | NM_180588.1    | REEP4         | 0.339246259 |
| ILMN_2620326 | NM_024264.4    | CYP27A1       | 0.339235912 |
| ILMN_2601147 | NM_023645.3    | KDELC1        | 0.339178472 |
| ILMN_1216439 | XM_979472.1    | 1700084E18RIK | 0.339176625 |
| ILMN_2787580 | NM_027013.1    | SCNM1         | 0.339142111 |
| ILMN_2834837 | NM_011711.1    | FMNL3         | 0.339117886 |
| ILMN_2877253 | NM_001008501.1 | ZFP760        | 0.338928297 |
| ILMN_1232175 | NM_145409.1    | CHTF18        | 0.338873154 |
| ILMN_2766580 | NM_010926.4    | COX4NB        | 0.338760972 |
| ILMN_2981167 | NM_008332.2    | IFIT2         | 0.338607841 |
| ILMN_2625125 | NM_009987.2    | CX3CR1        | 0.338545201 |
| ILMN_2455390 |                | 2810402K13RIK | 0.338324439 |
| ILMN_2813454 | NM_025384.3    | DNAJC15       | 0.33830571  |
| ILMN_2777471 | NM_010398.1    | H2-T23        | 0.338297644 |
| ILMN_2801427 | NM_027294.1    | CMTM8         | 0.338257374 |
| ILMN_1246911 |                | 4022450E19RIK | 0.338173059 |
| ILMN_2719811 | NM_008479.1    | LAG3          | 0.338164012 |
| ILMN_2942353 | NM_009138.1    | CCL25         | 0.338115837 |
| ILMN_1219244 | NM_172760.2    | ELMO3         | 0.338097557 |
| ILMN_2844370 | NM_173751.3    | ILVBL         | 0.33790538  |
| ILMN_2764019 | NM_172591.2    | FCHO2         | 0.337899468 |
| ILMN_2977624 | NM_009103.2    | RRM1          | 0.337687757 |
| ILMN_1230518 | NM_021463.3    | PRPS1         | 0.337621697 |
| ILMN_1220256 |                | A430083G20RIK | 0.337607661 |
| ILMN_2798213 | NM_146231.1    | ZFP825        | 0.337564642 |
| ILMN_2888375 | NM_026597.1    | 6230427J02RIK | 0.337445757 |
| ILMN_2647170 | NM_023475.2    | SERHL         | 0.337439758 |
| ILMN_3150233 | NM_001039581.1 | ABCA3         | 0.337304892 |
| ILMN_1243910 | XM_909747.3    | ZFP292        | 0.337239324 |
| ILMN_2729008 | NM_029557.1    | TSEN54        | 0.337216733 |

|              |                |               |             |
|--------------|----------------|---------------|-------------|
| ILMN_3010110 | NM_024211.2    | SLC25A11      | 0.336990563 |
| ILMN_2519802 |                | FADS2         | 0.336871096 |
| ILMN_1237846 | XR_034194.1    | LOC100044087  | 0.336669443 |
| ILMN_2743991 | NM_178883.5    | SCYL1BP1      | 0.336621965 |
| ILMN_1239607 | NM_138306.1    | DGKZ          | 0.33661383  |
| ILMN_1255010 |                | MAP2K5        | 0.336533484 |
| ILMN_2470039 |                | D930001I22RIK | 0.33651446  |
| ILMN_2964841 | NM_008905.1    | PPFIBP2       | 0.336138868 |
| ILMN_2591414 | NM_025816.2    | TAX1BP1       | 0.335899127 |
| ILMN_1243170 | NM_027873.2    | UBIAD1        | 0.335768241 |
| ILMN_2688383 | NM_138747.1    | NOL1          | 0.335631973 |
| ILMN_1242310 | NM_018883.2    | CAMKK1        | 0.335629186 |
| ILMN_2923048 | NM_012046.1    | SPO11         | 0.335622617 |
| ILMN_2755544 | NM_001039967.1 | 1200003I07RIK | 0.335569684 |
| ILMN_2729235 | NM_175098.2    | CCDC126       | 0.335547554 |
| ILMN_2966722 | NM_011738.1    | YWHAH         | 0.335528411 |
| ILMN_2628551 | XM_001475154.1 | LOC100045782  | 0.335506031 |
| ILMN_3051392 | NM_153053.3    | SF3B4         | 0.335494442 |
| ILMN_2701355 | NM_178421.3    | NANOS1        | 0.335466749 |
| ILMN_1215651 | NM_007671.2    | CDKN2C        | 0.335400373 |
| ILMN_1254136 |                | D930009C14RIK | 0.335352587 |
| ILMN_2675433 | NM_172339.2    | SNAPC4        | 0.335111741 |
| ILMN_3136355 | NM_001081118.1 | PHRF1         | 0.33507245  |
| ILMN_1257328 | XR_032025.1    | LOC667269     | 0.335025937 |
| ILMN_2620510 | NM_011550.2    | MLX           | 0.334888817 |
| ILMN_2713071 |                | FADS2         | 0.334490072 |
| ILMN_1245850 | NM_028963.2    | 4933427D14RIK | 0.334394032 |
| ILMN_2652187 | NM_198602.2    | CUX1          | 0.334197731 |
| ILMN_2675152 | NM_181403.2    | VPS37C        | 0.334165166 |
| ILMN_2695468 | NM_028264.2    | TMEM55A       | 0.334141772 |
| ILMN_1230252 |                | ARFGEF2       | 0.333845734 |
| ILMN_2669461 | NM_027444.2    | BBX           | 0.333669852 |
| ILMN_2812935 | NM_133826.2    | ATP6V1H       | 0.333616904 |
| ILMN_1240153 | NM_019562.1    | UCHL5         | 0.333598654 |
| ILMN_1234944 | XM_001476198.1 | CNGB1         | 0.333418732 |
| ILMN_2650275 | NM_028077.2    | 1810055G02RIK | 0.333416885 |
| ILMN_2800500 | NM_028484.1    | 1700037C18RIK | 0.33338242  |
| ILMN_2646241 | NM_207670.1    | GRIPAP1       | 0.33320761  |
| ILMN_2642012 | XR_032589.1    | LOC100046457  | 0.333195623 |
| ILMN_1228385 | NM_080553.2    | ITPR3         | 0.333169482 |
| ILMN_2650266 | NM_177275.4    | AMIGO3        | 0.333031845 |
| ILMN_2790399 | NM_133992.1    | USP52         | 0.332994782 |
| ILMN_1256102 | XM_972667.1    | LOC669001     | 0.332764307 |
| ILMN_2674378 | NM_153542.1    | LRRC20        | 0.332678625 |
| ILMN_1236958 | NM_020590.4    | GABARAPL1     | 0.33257622  |
| ILMN_2752234 | NM_133922.2    | KRBA1         | 0.332418587 |



|              |                |               |             |
|--------------|----------------|---------------|-------------|
| ILMN_2526711 | XM_129620.2    | LOC226758     | 0.33233493  |
| ILMN_2600085 | NM_011958.3    | ORC4L         | 0.332058302 |
| ILMN_1217567 | NM_026068.2    | MED31         | 0.332049995 |
| ILMN_1222251 | NM_028244.1    | RRP1B         | 0.332043333 |
| ILMN_2765452 | NM_019919.2    | LTBP1         | 0.331894575 |
| ILMN_1257445 | NM_001081326.1 | AGL           | 0.331706126 |
| ILMN_1216860 |                | A430006M23RIK | 0.331693815 |
| ILMN_2433685 | NM_007647.2    | ENTPD5        | 0.331680338 |
| ILMN_1226174 |                | ENTPD4        | 0.331594072 |
| ILMN_2725227 | XR_031944.1    | LOC100045737  | 0.331259035 |
| ILMN_2728300 | NM_148922.2    | MDM1          | 0.33124401  |
| ILMN_2498368 | NM_001077265.1 | HNRNPD        | 0.331129702 |
| ILMN_1229702 | NM_147201.2    | NRBP1         | 0.331125789 |
| ILMN_2486829 |                | 9030418K01RIK | 0.331014793 |
| ILMN_2954868 | NM_011854.1    | OASL2         | 0.330938701 |
| ILMN_2605393 | NM_008550.1    | MAN2B2        | 0.330908554 |
| ILMN_1227300 | NM_009679.2    | AP2M1         | 0.330881825 |
| ILMN_2802168 | NM_001013381.1 | RSAD1         | 0.3308432   |
| ILMN_2522884 |                | 9930105H17RIK | 0.330838988 |
| ILMN_1220624 | NM_001081477.1 | BRWD3         | 0.330808837 |
| ILMN_2434200 |                | ADAM11        | 0.330767362 |
| ILMN_1221011 | NM_173181.3    | FAM164A       | 0.330687113 |
| ILMN_3109491 | NM_145836.1    | 6430527G18RIK | 0.33048641  |
| ILMN_2639900 | NM_009996.2    | CYP24A1       | 0.330418163 |
| ILMN_2591156 | NM_016671.2    | IL27RA        | 0.330341655 |
| ILMN_2648482 | NM_026574.3    | INO80         | 0.330196599 |
| ILMN_1255423 | NM_010331.2    | GPAA1         | 0.330128204 |
| ILMN_1242661 | NM_008404.4    | ITGB2         | 0.330007308 |
| ILMN_2666347 | NM_172538.4    | VEZT          | 0.329922792 |
| ILMN_2481117 |                | 1700052O22RIK | 0.329807628 |
| ILMN_2703061 | NM_198619.2    | 2810408P10RIK | 0.329742587 |
| ILMN_2667909 | NM_008180.1    | GSS           | 0.329658465 |
| ILMN_2524691 |                | 1190002N15RIK | 0.329544364 |
| ILMN_2952292 | NM_025323.2    | 0610009D07RIK | 0.329540142 |
| ILMN_2841043 | NM_175334.2    | MAML1         | 0.329513355 |
| ILMN_2436489 | NM_019806.5    | VAPB          | 0.329510387 |
| ILMN_2574233 |                | A630047J05RIK | 0.329494054 |
| ILMN_3059557 | NM_010870.2    | NAIP5         | 0.329233614 |
| ILMN_2847332 | NM_026524.2    | MID1IP1       | 0.329225877 |
| ILMN_2768209 | NM_153557.1    | BC029214      | 0.329004154 |
| ILMN_1251663 |                | BCL7C         | 0.328918428 |
| ILMN_2956741 | NM_025832.2    | NARG1L        | 0.328897723 |
| ILMN_2674936 |                | SF3B5         | 0.328835332 |
| ILMN_2604669 | NM_001008785.3 | KBTBD8        | 0.328670483 |
| ILMN_1252204 | NM_009156.2    | SEPW1         | 0.328426613 |
| ILMN_2783438 | NM_133761.2    | DCP1A         | 0.328393704 |

|              |                |               |             |
|--------------|----------------|---------------|-------------|
| ILMN_2777284 | NM_177333.3    | EXOC3         | 0.328376488 |
| ILMN_2851455 | NM_001007581.1 | 2810408M09RIK | 0.328171043 |
| ILMN_1224222 | NM_133837.4    | CDC123        | 0.327805582 |
| ILMN_1230426 | XM_354575.1    | LOC380670     | 0.327732649 |
| ILMN_2961179 | NM_018783.4    | TFIP11        | 0.327607834 |
| ILMN_3089660 | NM_133194.3    | SCML2         | 0.327598358 |
| ILMN_3005669 | NM_177327.3    | WWP1          | 0.327578937 |
| ILMN_2724235 | NM_011586.2    | MYO18A        | 0.327467119 |
| ILMN_2718189 | NM_023543.1    | CHN2          | 0.327352528 |
| ILMN_2605666 | NM_010685.2    | LAMP2         | 0.327330382 |
| ILMN_2695149 |                | SMC5L1        | 0.327324369 |
| ILMN_2603662 | NM_172691.2    | B230312A22RIK | 0.327190797 |
| ILMN_3152079 | NM_008767.2    | SLC22A18      | 0.327011171 |
| ILMN_1242687 | NM_026247.1    | ALG13         | 0.327007329 |
| ILMN_2948014 | NM_001013793.1 | AA388235      | 0.326970848 |
| ILMN_1259418 | NM_153779.1    | AIFM2         | 0.326955686 |
| ILMN_1252364 | NM_011046.2    | FURIN         | 0.32685032  |
| ILMN_1230397 |                | A630064P09RIK | 0.326531732 |
| ILMN_1213455 |                | RBM14         | 0.326501031 |
| ILMN_2664327 | NM_001042420.1 | CABYR         | 0.326480799 |
| ILMN_1234692 | NM_026185.4    | 1300007F04RIK | 0.326460776 |
| ILMN_1223343 | NM_144533.2    | NMNAT3        | 0.32645935  |
| ILMN_2796869 | NM_019441.2    | PPT2          | 0.326309822 |
| ILMN_2768285 | NM_175175.3    | PLEKHF2       | 0.326286407 |
| ILMN_1238777 | NM_008890.1    | PNMT          | 0.326253743 |
| ILMN_2759933 | NM_010304.3    | GNA15         | 0.326186634 |
| ILMN_2551744 |                | TSGA14        | 0.326177917 |
| ILMN_1245341 |                | 9430084D13RIK | 0.325999682 |
| ILMN_2937674 | NM_198671.1    | GSE1          | 0.325911705 |
| ILMN_2721799 | NM_023231.2    | STOML2        | 0.325827577 |
| ILMN_1240938 |                | AW212394      | 0.325650552 |
| ILMN_2690506 | NM_146216.2    | VAC14         | 0.325551703 |
| ILMN_2682103 | NM_001005507.1 | SMG7          | 0.325448742 |
| ILMN_3160568 | NM_001033198.2 | ANKRD50       | 0.325433916 |
| ILMN_2734283 | NM_178696.3    | SLC25A44      | 0.325295705 |
| ILMN_2619380 | NM_030729.4    | NCKIPSD       | 0.325129031 |
| ILMN_1237664 | NM_133858.3    | 4930504E06RIK | 0.325000197 |
| ILMN_2751332 | NM_001039081.1 | MIER1         | 0.324995923 |
| ILMN_2627557 | NM_144517.3    | TBC1D19       | 0.324905829 |
| ILMN_2416424 | NM_146099.2    | D19WSU162E    | 0.324835017 |
| ILMN_2513778 | NM_145439.1    | TMC6          | 0.324519535 |
| ILMN_2813524 | NM_146183.1    | ZFP428        | 0.324138307 |
| ILMN_2668536 | NM_172698.2    | 4732418C07RIK | 0.324074663 |
| ILMN_2879876 | NM_026254.2    | TBC1D23       | 0.323955943 |
| ILMN_2621812 | NM_031189.1    | MYOG          | 0.323883945 |
| ILMN_1244036 | XM_907249.2    | ZMYND17       | 0.323745514 |

|              |                |               |             |
|--------------|----------------|---------------|-------------|
| ILMN_1213947 | NM_172685.3    | SLC25A24      | 0.323743175 |
| ILMN_2867013 | NM_145483.1    | ZFP160        | 0.32371946  |
| ILMN_3146362 | NM_177700.3    | ATMIN         | 0.323630654 |
| ILMN_2617441 | NM_027886.2    | STK11IP       | 0.323599298 |
| ILMN_2846254 | NM_023217.2    | PGPEP1        | 0.323580353 |
| ILMN_1228048 | NM_172754.2    | AI449175      | 0.323552429 |
| ILMN_3160416 | NM_028372.1    | 2900024O10RIK | 0.323524386 |
| ILMN_2641013 | NM_030557.2    | MYNN          | 0.323501532 |
| ILMN_2756678 | XR_004916.1    | LOC676389     | 0.323397589 |
| ILMN_2774572 |                | CRYGN         | 0.323295547 |
| ILMN_2645780 | NM_027950.1    | OSGIN1        | 0.323293351 |
| ILMN_2791811 | NM_173347.2    | PRUNE         | 0.323284645 |
| ILMN_2652056 | NM_001014996.1 | CENPJ         | 0.323280445 |
| ILMN_2418957 |                | 5930418K15RIK | 0.323162275 |
| ILMN_1224658 | NM_016962.1    | SPAST         | 0.323038405 |
| ILMN_1217262 | NM_024231.2    | ZFPL1         | 0.322997803 |
| ILMN_1251371 | NM_001013022.1 | 2010001J22RIK | 0.322972591 |
| ILMN_2737840 | NM_009325.3    | TBXA2R        | 0.322915789 |
| ILMN_2566822 |                | A230067E15RIK | 0.322843329 |
| ILMN_2907499 | NM_001033463.1 | TATDN2        | 0.322802032 |
| ILMN_1249999 | NM_023645.2    | KDELC1        | 0.32266278  |
| ILMN_2742145 | NM_175214.3    | KIF27         | 0.322633499 |
| ILMN_2933228 | NM_145353.1    | YIPF3         | 0.322622448 |
| ILMN_1215039 | NM_028634.3    | CBY1          | 0.322589043 |
| ILMN_2876560 | NM_153580.1    | INO80E        | 0.322360038 |
| ILMN_1232295 |                | SORT1         | 0.322311135 |
| ILMN_2747754 | NM_153781.1    | PYGB          | 0.322299093 |
| ILMN_3114339 | NM_001002792.1 | C230029F24RIK | 0.322273857 |
| ILMN_1213572 | XR_033559.1    | 4931440L10RIK | 0.322051231 |
| ILMN_1239860 | NM_026958.2    | 1810035L17RIK | 0.322029667 |
| ILMN_2646438 | NM_199011.1    | DGKQ          | 0.321959942 |
| ILMN_3137432 | NM_133852.2    | GOLGA2        | 0.321832896 |
| ILMN_1244409 | NM_153582.4    | CMTM4         | 0.321799779 |
| ILMN_1243812 | NM_031256.2    | PLEKHA3       | 0.321547241 |
| ILMN_2652385 | NM_054078.2    | BAZ2A         | 0.321474488 |
| ILMN_2489405 |                | D1ERTD396E    | 0.32145972  |
| ILMN_3008230 | NM_172297.1    | CCDC9         | 0.321440256 |
| ILMN_2956881 | NM_009358.2    | PPP2R5D       | 0.321439443 |
| ILMN_1214353 | NM_013562.1    | IFRD1         | 0.321403466 |
| ILMN_2702997 | NM_026909.1    | THAP7         | 0.321288549 |
| ILMN_2683138 | NM_134034.1    | SMEK2         | 0.321227634 |
| ILMN_2754569 | NM_001081429.1 | CCDC15        | 0.321189905 |
| ILMN_2786164 | NM_146124.2    | ARHGAP1       | 0.321169616 |
| ILMN_2973824 | NM_011797.1    | CAR14         | 0.320761097 |
| ILMN_2657432 | NM_173013.2    | MTAP1S        | 0.320606583 |
| ILMN_2417174 |                | UBE2H         | 0.320515345 |

|              |                |               |             |
|--------------|----------------|---------------|-------------|
| ILMN_2773624 | NM_010421.4    | HEXA          | 0.320344256 |
| ILMN_3146018 | NM_001048179.1 | CCL27         | 0.32026918  |
| ILMN_2709392 | NM_001081065.1 | ZFP707        | 0.320264762 |
| ILMN_2657421 | NM_199446.1    | PHKB          | 0.320123861 |
| ILMN_2769285 | XM_001004114.1 | SEMA6B        | 0.320018029 |
| ILMN_2430275 | NM_145931.1    | ZC3H7A        | 0.319887524 |
| ILMN_1227579 | NM_025590.3    | ACOT11        | 0.319876991 |
| ILMN_2828687 | NM_001003913.1 | MARS          | 0.319810715 |
| ILMN_1217000 | NM_023524.1    | TFPT          | 0.319765111 |
| ILMN_2451578 | NM_028063.2    | TRMU          | 0.319723285 |
| ILMN_2620061 | NM_025548.1    | TBCB          | 0.319656219 |
| ILMN_2652645 | NM_008143.3    | GNB2L1        | 0.319586041 |
| ILMN_1253819 | NM_011158.3    | PRKAR2B       | 0.319540596 |
| ILMN_2809436 | NM_025666.1    | 5730410I19RIK | 0.319521321 |
| ILMN_2616786 | NM_145396.4    | TBL3          | 0.319418766 |
| ILMN_2660864 | NM_026448.2    | KLHL7         | 0.319418739 |
| ILMN_2854858 | NM_009547.2    | ZFP161        | 0.319350652 |
| ILMN_1231066 | NM_178214.3    | HIST2H2BE     | 0.319337596 |
| ILMN_1260440 |                | SNX13         | 0.31928454  |
| ILMN_1231520 | NM_022017.1    | TRPV4         | 0.319257205 |
| ILMN_2684855 | NM_001037741.2 | GPX4          | 0.31918477  |
| ILMN_2821460 | NM_011206.2    | PTPN18        | 0.319173079 |
| ILMN_2674544 | XM_140052.3    | 1700061G19RIK | 0.318996906 |
| ILMN_1236303 | NM_198606.1    | WDSOF1        | 0.318949965 |
| ILMN_1235196 | NM_153389.2    | ATP10D        | 0.318743727 |
| ILMN_1255201 | NM_010049.3    | DHFR          | 0.318709785 |
| ILMN_1213362 | XM_983525.1    | EG666387      | 0.318627081 |
| ILMN_1219510 | XM_355167.1    | LOC381230     | 0.318614795 |
| ILMN_2612448 | NM_133957.2    | NFAT5         | 0.318600854 |
| ILMN_2651076 | NM_025858.1    | SCOTIN        | 0.318555688 |
| ILMN_2748537 | NM_019709.3    | MBTPS1        | 0.318374906 |
| ILMN_2596522 | NM_013602.2    | MT1           | 0.318354978 |
| ILMN_1234685 | NM_199009.1    | FAM160A2      | 0.318240121 |
| ILMN_1238289 | NM_016979.1    | PRKX          | 0.318055391 |
| ILMN_1231381 | NM_146520.2    | OLFR536       | 0.318043655 |
| ILMN_1225086 | NM_026712.2    | ZFP414        | 0.318013066 |
| ILMN_1220365 |                | INVS          | 0.317867979 |
| ILMN_3097950 | NM_023046.4    | ASB1          | 0.317621201 |
| ILMN_2927638 | NM_024263.3    | MXRA8         | 0.317617396 |
| ILMN_1239523 |                | 2010015P12RIK | 0.317607595 |
| ILMN_2533840 | XM_137196.3    | LOC237408     | 0.317598966 |
| ILMN_2753096 | NM_148926.2    | ZFAND3        | 0.317551719 |
| ILMN_1247616 | NM_001081423.1 | TTLL5         | 0.317529387 |
| ILMN_1231228 | NM_009067.3    | RALBP1        | 0.317414248 |
| ILMN_2512986 | NM_177319.2    | ZFYVE27       | 0.317366261 |
| ILMN_1229670 |                | 2810012D02RIK | 0.317269657 |

|              |                |               |             |
|--------------|----------------|---------------|-------------|
| ILMN_1240864 | NM_020557.3    | TYKI          | 0.317223344 |
| ILMN_1243451 | NM_001042489.1 | HVCN1         | 0.317072456 |
| ILMN_2861469 | NM_011370.1    | CYFIP1        | 0.317060707 |
| ILMN_2444626 |                | SAP18         | 0.316919904 |
| ILMN_2965066 | NM_026101.2    | HERC4         | 0.316916442 |
| ILMN_2734045 | NM_026732.2    | MRPL14        | 0.316880432 |
| ILMN_1254987 | NM_175341.4    | MBNL2         | 0.316869161 |
| ILMN_3158135 | NM_013662.1    | SEMA6B        | 0.316798618 |
| ILMN_2948800 | NM_028377.1    | 2900006K08RIK | 0.316734375 |
| ILMN_1224713 | NM_172723.4    | ADAP1         | 0.316465961 |
| ILMN_2792047 | NM_133694.1    | FBXL15        | 0.316460625 |
| ILMN_2628271 | XR_032154.1    | LOC100045967  | 0.316374857 |
| ILMN_2734549 | NM_013911.2    | FBXL12        | 0.316344341 |
| ILMN_2719460 | NM_198020.1    | TRMT1         | 0.316266856 |
| ILMN_2606973 |                | AV028368      | 0.316234716 |
| ILMN_1237148 | NM_013720.1    | MGA           | 0.316212429 |
| ILMN_2783500 | NM_153804.3    | PLEKHG3       | 0.316147159 |
| ILMN_2684494 | NM_023130.2    | RALY          | 0.316100163 |
| ILMN_2989871 | NM_175031.3    | STK36         | 0.316025888 |
| ILMN_1244753 | NM_025289.2    | TBRG1         | 0.315982873 |
| ILMN_2962273 | NM_008020.2    | FKBP2         | 0.31594877  |
| ILMN_2457835 |                | SIN3B         | 0.315799627 |
| ILMN_2772930 |                | GFI1B         | 0.315792591 |
| ILMN_2805697 | NM_026437.1    | 1810055E12RIK | 0.315683283 |
| ILMN_2589686 | NM_001081462.1 | GTF2IRD1      | 0.315635086 |
| ILMN_2508910 |                | TPST2         | 0.315454901 |
| ILMN_2954265 | NM_019713.3    | RASSF1        | 0.315345448 |
| ILMN_1252845 | NM_009085.2    | POLR1C        | 0.315335874 |
| ILMN_1242533 | NM_020493.2    | SRF           | 0.315332505 |
| ILMN_1223251 |                | TERF2         | 0.315274304 |
| ILMN_1224915 |                | A930006A19RIK | 0.315158817 |
| ILMN_2877909 | NM_178246.3    | SMG5          | 0.314853566 |
| ILMN_2911283 | NM_198613.1    | AP2S1         | 0.314660521 |
| ILMN_1226186 | NM_007465.1    | BIRC2         | 0.314614828 |
| ILMN_2784144 | NM_011242.1    | RASGRP2       | 0.314481609 |
| ILMN_2957161 | NM_026796.1    | SMYD2         | 0.314452273 |
| ILMN_2786070 | NM_148928.1    | GTF3C5        | 0.314442737 |
| ILMN_1254640 |                | 4932441N08RIK | 0.314362149 |
| ILMN_2801404 | NM_007713.3    | CLK3          | 0.314281062 |
| ILMN_2697693 | NM_080289.1    | GRHPR         | 0.314237261 |
| ILMN_2531368 | XM_355106.1    | LOC381180     | 0.314137774 |
| ILMN_2626432 | NM_001081981.1 | NFIX          | 0.314069414 |
| ILMN_1231053 | NM_013549.1    | HIST2H2AA1    | 0.31395025  |
| ILMN_1235442 |                | 6430403C09RIK | 0.313928394 |
| ILMN_3045269 | NM_001006677.1 | KCNQ2         | 0.313876253 |
| ILMN_2701271 | NM_011636.1    | PLSCR1        | 0.313716192 |

|              |                |               |             |
|--------------|----------------|---------------|-------------|
| ILMN_2847269 | NM_026388.2    | TPRGL         | 0.313699739 |
| ILMN_1229684 | NM_001081226.1 | 2310009B15RIK | 0.313680704 |
| ILMN_2629446 | NM_144806.1    | PRPSAP2       | 0.313668183 |
| ILMN_2561029 |                | 9930033H14RIK | 0.313562159 |
| ILMN_2666108 | NM_023672.2    | SSBP3         | 0.313548116 |
| ILMN_1229216 | NM_001033324.2 | ZBTB16        | 0.313516584 |
| ILMN_2623735 | NM_172404.2    | CCBL1         | 0.313497228 |
| ILMN_1253601 | NM_030210.1    | AACS          | 0.313330605 |
| ILMN_1249586 | NM_031165.4    | HSPA8         | 0.313286667 |
| ILMN_2632519 | XM_001479840.1 | WDR90         | 0.313269987 |
| ILMN_2686320 | NM_153158.3    | E130308A19RIK | 0.313079324 |
| ILMN_2711461 | NM_011577.1    | TGFB1         | 0.312774253 |
| ILMN_1212894 | NM_009806.2    | CASK          | 0.312736345 |
| ILMN_1212975 | NM_133734.2    | WDR23         | 0.312619611 |
| ILMN_2737959 | NM_183034.1    | PLEKHM1       | 0.312498736 |
| ILMN_2735625 | NM_133947.2    | NUMA1         | 0.312431233 |
| ILMN_2616709 | NM_022656.2    | NISCH         | 0.312392557 |
| ILMN_2419185 | NM_011656.2    | TUFT1         | 0.312388712 |
| ILMN_1222497 | NM_172677.2    | YTHDF3        | 0.312349666 |
| ILMN_2890574 | NM_001002929.3 | NUP85         | 0.312337645 |
| ILMN_2622200 | NM_177622.3    | ZFP595        | 0.312286022 |
| ILMN_2984434 | NM_145431.1    | NLE1          | 0.312257074 |
| ILMN_1247327 | NM_001098837.1 | ATXN7L3       | 0.312242664 |
| ILMN_1229827 | NM_001083315.1 | ST7           | 0.312155218 |
| ILMN_2523427 |                | 2010003O02RIK | 0.312049704 |
| ILMN_2664077 | NM_172674.2    | PHF20         | 0.311762338 |
| ILMN_1234315 | XR_003545.1    | LOC545396     | 0.31172805  |
| ILMN_3096335 | NM_178220.3    | ARRB1         | 0.31169464  |
| ILMN_2592187 | NM_177312.2    | 6330408A02RIK | 0.311694528 |
| ILMN_2630730 | NM_026175.4    | SF3A1         | 0.311693225 |
| ILMN_2693850 | NM_011236.1    | RAD52         | 0.311679187 |
| ILMN_2752966 | NM_021297.2    | TLR4          | 0.311641596 |
| ILMN_2983565 | NM_001013577.1 | 1110054O05RIK | 0.311637762 |
| ILMN_1225594 | NM_198001.1    | 1110008P14RIK | 0.311610558 |
| ILMN_1259535 | XM_900750.2    | 2210015D19RIK | 0.311539868 |
| ILMN_1259781 | XM_922989.2    | A430041B07RIK | 0.311347382 |
| ILMN_1236354 |                | E130302P19RIK | 0.311330116 |
| ILMN_1220897 | NM_134233.1    | V1RG11        | 0.311250455 |
| ILMN_2915166 | NM_023547.1    | INO80B        | 0.311225111 |
| ILMN_3162180 | NM_001001180.2 | BC066028      | 0.31119333  |
| ILMN_2426691 |                | MT-CO2        | 0.311186634 |
| ILMN_2453620 | NM_025985.4    | UBE2G1        | 0.311118119 |
| ILMN_2500997 | NM_023140.4    | GLRX3         | 0.31107554  |
| ILMN_1256203 | NM_145993.2    | L3MBTL2       | 0.311045142 |
| ILMN_1238838 | XR_031422.1    | LOC100045005  | 0.311035789 |
| ILMN_2684732 | NM_144802.3    | HNRPLL        | 0.310889156 |

|              |                |               |             |
|--------------|----------------|---------------|-------------|
| ILMN_1233911 |                | A830021K08RIK | 0.31084845  |
| ILMN_2616309 | NM_145925.2    | PTTG1IP       | 0.310774799 |
| ILMN_2631558 | NM_025959.3    | PSMC6         | 0.310728719 |
| ILMN_2933618 | NM_027189.1    | GEMIN7        | 0.310645535 |
| ILMN_2615015 | NM_133198.1    | PYGL          | 0.310634358 |
| ILMN_2876712 | NM_133922.2    | KRBA1         | 0.310631646 |
| ILMN_2771326 | NM_016843.3    | ATXN10        | 0.310603707 |
| ILMN_1224802 | NM_023128.2    | PALM          | 0.310570033 |
| ILMN_2619707 | NM_175316.3    | SLCO2B1       | 0.310323929 |
| ILMN_2489694 |                | TADA3L        | 0.31025159  |
| ILMN_1215807 | NM_028608.2    | GLIPR1        | 0.310212003 |
| ILMN_1248771 | NM_011484.2    | STAM          | 0.310179898 |
| ILMN_2681186 | NM_144875.1    | RAB7L1        | 0.310139678 |
| ILMN_3158499 | NM_001012336.1 | MDK           | 0.309988541 |
| ILMN_2489360 | NM_027959.3    | PDIA6         | 0.309956584 |
| ILMN_2563847 |                | AZI2          | 0.309904227 |
| ILMN_3161480 | NM_139309.4    | FKTN          | 0.309656201 |
| ILMN_2703099 | NM_024267.6    | IPO4          | 0.309634397 |
| ILMN_1237230 | NM_010048.2    | DGCR2         | 0.30940129  |
| ILMN_2726595 | NM_175558.3    | ZFP446        | 0.30936495  |
| ILMN_1221274 | NM_026405.3    | RAB32         | 0.309127573 |
| ILMN_2489210 |                | ACTR1B        | 0.309064427 |
| ILMN_3078499 | NM_058214.2    | RECQL4        | 0.309002014 |
| ILMN_2782841 | NM_178418.2    | BC050811      | 0.308948525 |
| ILMN_1245489 | NM_028014.3    | 2310067B10RIK | 0.308900017 |
| ILMN_2646456 | NM_133242.1    | RNPC2         | 0.308702817 |
| ILMN_2596961 | NM_144888.1    | D430028G21RIK | 0.308628478 |
| ILMN_1218051 | NM_027711.1    | IQGAP2        | 0.308285787 |
| ILMN_3079442 | NM_198861.1    | BC046404      | 0.308254196 |
| ILMN_2722769 | NM_029512.2    | TTPAL         | 0.308198281 |
| ILMN_2914295 | NM_026938.1    | TMEM160       | 0.307756024 |
| ILMN_2443014 | NM_145853.2    | TPCN1         | 0.307693617 |
| ILMN_1256328 | NM_011597.2    | TJP2          | 0.307656526 |
| ILMN_2793442 | NM_138744.2    | SSX2IP        | 0.307494094 |
| ILMN_1237431 |                | D330050H21RIK | 0.307426153 |
| ILMN_2808186 | NM_053266.1    | GTF2IRD2      | 0.307425569 |
| ILMN_2602204 | NM_001081229.1 | TSC22D2       | 0.3073978   |
| ILMN_1222185 | XM_001476689.1 | LOC100041613  | 0.307394899 |
| ILMN_2874270 | NM_010451.1    | HOXA2         | 0.307280173 |
| ILMN_1255559 | NM_001081247.1 | POLR3A        | 0.307274182 |
| ILMN_1241976 | NM_133835.1    | UBAC1         | 0.307249743 |
| ILMN_2806159 | NM_021278.2    | TMSB4X        | 0.307223956 |
| ILMN_3129372 | NM_029813.2    | 2210418O10RIK | 0.307066108 |
| ILMN_2814333 | NM_010709.1    | LGTN          | 0.306939058 |
| ILMN_3162332 | NM_177346.4    | GPR149        | 0.306827145 |
| ILMN_2452440 | NM_013827.2    | MTF2          | 0.306797993 |

|              |                |               |             |
|--------------|----------------|---------------|-------------|
| ILMN_1218324 | XM_001477831.1 | EG382161      | 0.306696127 |
| ILMN_1217075 | XM_125817.6    | BBS10         | 0.306685513 |
| ILMN_2435822 | NM_181820.2    | TMC4          | 0.306573336 |
| ILMN_1247397 | NM_199008.2    | COX11         | 0.30653025  |
| ILMN_2944576 | NM_145488.1    | PEX6          | 0.306527502 |
| ILMN_2777744 |                | HABP4         | 0.306289248 |
| ILMN_1247870 | NM_001083118.1 | TERF2         | 0.306120204 |
| ILMN_2742667 | NM_052993.2    | C1GALT1       | 0.306055952 |
| ILMN_2852672 | NM_020286.2    | TSPAN32       | 0.305895117 |
| ILMN_2931779 | NM_025793.1    | WDR45L        | 0.305874745 |
| ILMN_2670713 | NM_133769.2    | CYFIP2        | 0.305770544 |
| ILMN_2691567 | NM_026601.1    | HYI           | 0.305570711 |
| ILMN_2834916 | NM_011396.2    | SLC22A5       | 0.305359861 |
| ILMN_2592266 | NM_025861.2    | PQLC1         | 0.305316725 |
| ILMN_3154222 | NM_011791.2    | ASH2L         | 0.305294903 |
| ILMN_2837396 | NM_001005788.2 | ZFP69         | 0.3050686   |
| ILMN_2501489 | NM_009515.1    | WAS           | 0.305013948 |
| ILMN_2828512 | NM_172698.2    | 4732418C07RIK | 0.304912063 |
| ILMN_2645368 | NM_028543.3    | 1700065O13RIK | 0.30486057  |
| ILMN_2908735 | NM_008749.1    | NUCB1         | 0.304756054 |
| ILMN_1237530 | XM_981774.2    | VPS13B        | 0.304735139 |
| ILMN_1243835 |                | 2310020N23RIK | 0.304560627 |
| ILMN_1240892 | NM_146081.1    | PPP4R1        | 0.304319427 |
| ILMN_2777598 | NM_010150.2    | NR2F6         | 0.304034106 |
| ILMN_1250939 | NM_026792.3    | AGPAT5        | 0.303915352 |
| ILMN_1247991 | NM_027186.1    | RPAIN         | 0.303847362 |
| ILMN_1223102 | NM_172607.3    | NAPRT1        | 0.303745952 |
| ILMN_1213053 | NM_027462.4    | WARS2         | 0.303305496 |
| ILMN_2611676 | NM_139144.2    | OGT           | 0.303275549 |
| ILMN_2801790 | NM_026885.1    | CHMP2A        | 0.303245677 |
| ILMN_1224079 | NM_011716.2    | WFS1          | 0.302938557 |
| ILMN_1230192 | XM_001475994.1 | LOC100046298  | 0.30291268  |
| ILMN_2709787 | NM_177185.3    | D130059P03RIK | 0.302804607 |
| ILMN_2610127 | NM_018739.1    | RP9           | 0.302439402 |
| ILMN_1241001 | NM_012011.1    | EIF2S3Y       | 0.302432424 |
| ILMN_1214830 |                | ATP5K         | 0.302225014 |
| ILMN_2775660 |                | MYL6          | 0.302183019 |
| ILMN_2914456 | NM_144920.3    | PLEKHA5       | 0.302174857 |
| ILMN_2822053 | NM_009294.2    | STX4A         | 0.302157453 |
| ILMN_2423372 |                | 2310014D11RIK | 0.302046309 |
| ILMN_2731989 | NM_010162.2    | EXT1          | 0.302021711 |
| ILMN_2942499 | NM_148930.2    | RBM5          | 0.301935728 |
| ILMN_2650683 | NM_172605.2    | TDRD3         | 0.301907373 |
| ILMN_2963754 | NM_145557.1    | 9430015G10RIK | 0.301816178 |
| ILMN_2620365 | NM_175016.2    | ALKBH2        | 0.301686532 |
| ILMN_1219939 | NM_145491.2    | RHOQ          | 0.301672771 |



|              |                |               |             |
|--------------|----------------|---------------|-------------|
| ILMN_2791746 | NM_011182.2    | PSCD3         | 0.301556022 |
| ILMN_1247099 | NM_178029.3    | SETD1A        | 0.301488652 |
| ILMN_1258136 | NM_176841.3    | CCDC88A       | 0.301361899 |
| ILMN_1235494 | NM_025439.2    | TMEM9         | 0.301231368 |
| ILMN_2722353 | NM_029786.1    | POMGNT1       | 0.301230136 |
| ILMN_1258732 | NM_021351.1    | CRYBA4        | 0.301134901 |
| ILMN_1217485 | NM_173402.1    | RGS12         | 0.300959235 |
| ILMN_2981896 | NM_025464.2    | TMEM218       | 0.30084329  |
| ILMN_1217032 |                | D230048P18RIK | 0.300828972 |
| ILMN_2651831 | XM_290098.1    | 2310039L15RIK | 0.300598382 |
| ILMN_3032088 | NM_172899.2    | DMKN          | 0.300530184 |
| ILMN_2589312 | NM_026174.2    | ENTPD4        | 0.300258171 |
| ILMN_2506907 | XM_620495.3    | SAAL1         | 0.300114025 |
| ILMN_2935898 | NM_019760.1    | SERINC1       | 0.300019972 |
| ILMN_2848354 | NM_177362.2    | ZFP771        | 0.299973974 |
| ILMN_1214706 |                | C430014G13RIK | 0.299963843 |
| ILMN_1255776 | NM_144832.1    | BC017643      | 0.299667909 |
| ILMN_2612904 | NM_001024136.1 | ANKS6         | 0.29963257  |
| ILMN_2837779 | NM_011706.1    | TRPV2         | 0.299594223 |
| ILMN_2669460 | NM_145938.3    | RPP40         | 0.299584389 |
| ILMN_2867158 | NM_028426.1    | 3110007F17RIK | 0.299572266 |
| ILMN_1254333 | NM_016813.2    | NXF1          | 0.299496216 |
| ILMN_2769393 | NM_145124.2    | MIB2          | 0.299382379 |
| ILMN_2534253 | XM_126291.5    | LOC216963     | 0.29937892  |
| ILMN_1255086 |                | 2810454F19RIK | 0.299344471 |
| ILMN_1236232 | NM_207223.1    | ACAP3         | 0.299322197 |
| ILMN_1244086 |                | IMPA2         | 0.299209054 |
| ILMN_2477729 |                | 2310040B03RIK | 0.299133363 |
| ILMN_2981935 | NM_133227.2    | NUP155        | 0.299030081 |
| ILMN_3071907 | NM_008705.4    | NME2          | 0.298700718 |
| ILMN_2705689 | NM_028758.2    | GGA2          | 0.298669292 |
| ILMN_2976519 | NM_011810.2    | FAIM          | 0.298584635 |
| ILMN_2518946 | NM_024479.2    | WBSCR27       | 0.298514296 |
| ILMN_2592748 | XM_001477657.1 | BC059842      | 0.298413119 |
| ILMN_2644025 | NM_010438.2    | HK1           | 0.298371494 |
| ILMN_2438338 |                | ITPKB         | 0.298271281 |
| ILMN_1232861 | NM_008515.3    | LRRFIP1       | 0.298261077 |
| ILMN_3142193 | NM_153121.1    | LYSMD1        | 0.298056603 |
| ILMN_1222066 | XM_984943.1    | GLS           | 0.297862218 |
| ILMN_1226183 | NM_054041.2    | ANTXR1        | 0.297673329 |
| ILMN_2971314 | NM_027903.1    | DHDH          | 0.29762521  |
| ILMN_2692454 | NM_021501.3    | PIAS4         | 0.297624779 |
| ILMN_2479585 | NM_145547.1    | ZFP189        | 0.297551165 |
| ILMN_2785558 | NM_172462.4    | ZFP11         | 0.297498488 |
| ILMN_2842137 | NM_010562.1    | ILK           | 0.297411983 |
| ILMN_1235310 | NM_199145.1    | 3110062M04RIK | 0.2973008   |

|              |                |               |             |
|--------------|----------------|---------------|-------------|
| ILMN_2686745 | NM_173402.1    | RGS12         | 0.297298832 |
| ILMN_1250924 | NM_028484.2    | 1700037C18RIK | 0.297258084 |
| ILMN_1256179 |                | TXN2-PENDING  | 0.297198812 |
| ILMN_2590010 | NM_033523.4    | SPRED2        | 0.297189772 |
| ILMN_1243695 | NM_001081077.1 | CWF19L1       | 0.297187058 |
| ILMN_1239178 | NM_025890.2    | 2410004A20RIK | 0.297137836 |
| ILMN_1218323 | XM_922598.2    | SBF1          | 0.297113595 |
| ILMN_2939012 | NM_001081005.1 | 1500012F01RIK | 0.297012672 |
| ILMN_2662097 | NM_198163.1    | RAB35         | 0.296878171 |
| ILMN_2617552 | NM_001004155.1 | 9930012K11RIK | 0.296832962 |
| ILMN_2978009 | NM_001024917.1 | N4BP2         | 0.296700463 |
| ILMN_2911855 | NM_001014976.1 | ESPL1         | 0.296684618 |
| ILMN_2855423 | NM_054093.2    | UBE3B         | 0.29665356  |
| ILMN_2999167 | NM_145443.1    | L2HGDH        | 0.296539941 |
| ILMN_2866901 | NM_021474.2    | EFEMP2        | 0.296468069 |
| ILMN_2757092 | NM_025798.3    | HINT3         | 0.29643476  |
| ILMN_3163134 | NM_019665.2    | ARL6          | 0.296380691 |
| ILMN_1227573 | NM_016850.2    | IRF7          | 0.296235624 |
| ILMN_2575417 |                | A430023D23RIK | 0.296185055 |
| ILMN_2862465 | NM_031871.1    | GHDC          | 0.296125336 |
| ILMN_1236424 |                | CASP3         | 0.296019577 |
| ILMN_1221828 | NM_212438.1    | WIZ           | 0.295960421 |
| ILMN_1224268 | NM_025544.2    | MRPS15        | 0.295709984 |
| ILMN_2845208 | NM_028233.1    | LRPPRC        | 0.295610236 |
| ILMN_3143304 | NM_198607.1    | 4930572J05RIK | 0.295567185 |
| ILMN_2690396 | NM_026012.2    | NRADD         | 0.295535559 |
| ILMN_1221986 |                | GCAP3         | 0.295418797 |
| ILMN_2564003 |                | SH3D4         | 0.295363303 |
| ILMN_2774803 | NM_172562.3    | TADA2L        | 0.295351109 |
| ILMN_2699624 | NM_023197.1    | 2310008H09RIK | 0.295328038 |
| ILMN_2782503 | NM_053100.1    | TRIM8         | 0.29532302  |
| ILMN_2722678 | NM_013535.1    | GRCC10        | 0.295246824 |
| ILMN_1222560 | XM_977299.1    | SRGAP2        | 0.295233162 |
| ILMN_1241383 |                | SCRN1         | 0.295145804 |
| ILMN_2692853 | NM_145472.1    | C030006K11RIK | 0.295110436 |
| ILMN_2446727 |                | DDHD1         | 0.295063303 |
| ILMN_2660110 | NM_018758.1    | APBA3         | 0.294857729 |
| ILMN_2978533 | NM_026485.2    | TRABD         | 0.294753279 |
| ILMN_3162133 | NM_001033145.2 | 1190002N15RIK | 0.294732638 |
| ILMN_2582841 |                | D630024O11RIK | 0.294598117 |
| ILMN_1212941 | NM_198613.1    | AP2S1         | 0.294563469 |
| ILMN_2598420 | XM_619423.4    | RBM16         | 0.294499493 |
| ILMN_2470407 | NM_022409.1    | ZFP296        | 0.294388851 |
| ILMN_2940118 | NM_134212.1    | V1RH3         | 0.294144584 |
| ILMN_2671794 | NM_153793.1    | RELL2         | 0.294045283 |
| ILMN_2755519 | NM_025317.2    | MRPL54        | 0.293807982 |

|              |                |                 |             |
|--------------|----------------|-----------------|-------------|
| ILMN_2692141 | NM_010067.3    | TRDMT1          | 0.293803711 |
| ILMN_1251273 | NM_026164.2    | PNPLA8          | 0.293791801 |
| ILMN_2525034 | XM_123485.1    | CC1             | 0.293760754 |
| ILMN_2638958 | NM_009786.1    | CACYBP          | 0.293732322 |
| ILMN_2676243 | NM_178194.3    | HIST1H2BE       | 0.293668758 |
| ILMN_2832886 | NM_172291.1    | FOXRED1         | 0.293554987 |
| ILMN_1214975 | NM_146137.2    | AMIGO1          | 0.293424564 |
| ILMN_2613731 |                | 4932415G12RIK   | 0.293400476 |
| ILMN_2971204 | NM_175337.1    | MLH3            | 0.293377719 |
| ILMN_3161518 | NM_021434.4    | GPR180          | 0.293316378 |
| ILMN_2686571 | NM_008948.1    | PSMC3           | 0.29320829  |
| ILMN_1239092 | NM_018855.1    | GAS8            | 0.293016055 |
| ILMN_3147724 | NM_147151.1    | EHMT2           | 0.292937918 |
| ILMN_2960982 | NM_011068.1    | PEX11A          | 0.292920893 |
| ILMN_2924041 | NM_015761.1    | DOS             | 0.292889288 |
| ILMN_2836885 | NM_010462.2    | HOXC10          | 0.292859986 |
| ILMN_2701779 | NM_145988.1    | 1700108L22RIK   | 0.292787542 |
| ILMN_1234796 |                | HSD17B12        | 0.292770503 |
| ILMN_1246390 | XM_001475083.1 | LOC100045882    | 0.292554714 |
| ILMN_2632257 | NR_003619.1    | 6330549D23RIK   | 0.292433964 |
| ILMN_2619639 | NM_153577.2    | AI428936        | 0.292326726 |
| ILMN_2708415 | NM_019750.3    | NAT6            | 0.292273553 |
| ILMN_2772686 | XM_128511.3    | SCL0001647.1_23 | 0.292254218 |
| ILMN_2579927 |                | 9130020G22RIK   | 0.292209578 |
| ILMN_2619718 | NM_144820.3    | CCDC28A         | 0.292156652 |
| ILMN_2896229 | NM_027248.1    | ZFP219          | 0.292154539 |
| ILMN_2840818 | NM_025647.2    | CMPK            | 0.292077647 |
| ILMN_1221546 |                | MKIAA0282       | 0.292059576 |
| ILMN_3035795 | NM_027326.3    | MLLT3           | 0.292059266 |
| ILMN_2729718 | NM_011192.3    | PSME3           | 0.292010189 |
| ILMN_1233340 | NM_175464.2    | PKP4            | 0.291835409 |
| ILMN_1220593 | NM_153562.3    | BC023814        | 0.291823519 |
| ILMN_2423617 |                | ELAC1           | 0.291819556 |
| ILMN_2746947 | NM_010266.2    | GDA             | 0.29178244  |
| ILMN_1258526 | NM_011150.2    | LGALS3BP        | 0.291690571 |
| ILMN_1253958 | XM_905111.2    | EG237361        | 0.291678884 |
| ILMN_2656631 | NM_001081468.1 | GTF2IRD1        | 0.291651192 |
| ILMN_2649408 | NM_016761.1    | KIFC1           | 0.291619859 |
| ILMN_2800675 | NM_026846.1    | ZFAND2B         | 0.291586349 |
| ILMN_2730535 |                | STX17           | 0.291323754 |
| ILMN_2725035 | NM_026598.2    | EBPL            | 0.291201731 |
| ILMN_2684874 | NM_019502.2    | FXC1            | 0.29117135  |
| ILMN_2998230 | NM_016722.2    | GALNS           | 0.291164698 |
| ILMN_3006451 | NM_010589.3    | JAK3            | 0.290919247 |
| ILMN_1216987 | NM_007379.2    | ABCA2           | 0.290679795 |
| ILMN_2534518 | XM_137878.4    | LOC217240       | 0.290679666 |

|              |                |               |             |
|--------------|----------------|---------------|-------------|
| ILMN_1252526 | NM_178375.2    | ZSWIM3        | 0.290600643 |
| ILMN_2639189 | NM_026158.2    | ISOC2B        | 0.29044434  |
| ILMN_2851005 | NM_021303.2    | NOC2L         | 0.290413999 |
| ILMN_2430051 |                | 2210037E17RIK | 0.29037889  |
| ILMN_1237356 | XM_356263.1    | LOC382163     | 0.290368002 |
| ILMN_1232671 |                | C130078A06RIK | 0.2902113   |
| ILMN_1225654 | XM_001476786.1 | LOC100046775  | 0.29018433  |
| ILMN_3100688 | NM_001044697.1 | ZFP2          | 0.290176976 |
| ILMN_2755021 | NM_007692.5    | CHKB          | 0.289882705 |
| ILMN_2690122 | NM_011977.2    | SLC27A1       | 0.289657219 |
| ILMN_1217815 | NM_023116.3    | CACNB2        | 0.289585867 |
| ILMN_2441326 |                | ZFP260        | 0.289502237 |
| ILMN_1220680 |                | LPIN2         | 0.289445412 |
| ILMN_2519780 |                | FIN14         | 0.289309477 |
| ILMN_3154849 | NM_011802.2    | CLPX          | 0.289296769 |
| ILMN_3002745 | NM_178600.2    | VKORC1        | 0.289185473 |
| ILMN_2688176 | XM_140553.3    | BC046418      | 0.289171291 |
| ILMN_1247893 |                | CGEF2-PENDING | 0.289166971 |
| ILMN_2755667 |                | APBB1IP       | 0.289087683 |
| ILMN_1228453 | NM_001081024.1 | SETDB2        | 0.289048944 |
| ILMN_2811705 | NM_015792.1    | FBXO18        | 0.288975397 |
| ILMN_2615766 | NM_008363.2    | IRAK1         | 0.288908151 |
| ILMN_1222184 | NM_173186.3    | TBC1D24       | 0.288766473 |
| ILMN_1234165 | NM_029465.2    | CLEC4G        | 0.288719472 |
| ILMN_2729708 | NM_172587.2    | CDC14B        | 0.288593276 |
| ILMN_2477276 |                | 4833426J09RIK | 0.288500646 |
| ILMN_2644920 | NM_024413.1    | PLEKHF1       | 0.288420529 |
| ILMN_2839479 | NM_010102.1    | S1PR4         | 0.288382899 |
| ILMN_2515217 |                | 4432406C05RIK | 0.288319644 |
| ILMN_2586607 |                | 4833438J18RIK | 0.288260985 |
| ILMN_1225080 | NM_144912.3    | RAD9B         | 0.288075238 |
| ILMN_3162618 | NM_028190.2    | LUC7L         | 0.288058896 |
| ILMN_1229091 | XM_001478949.1 | LOC100047427  | 0.288055633 |
| ILMN_1217403 | NM_030074.2    | ZFP687        | 0.287517634 |
| ILMN_2550794 |                | D330022O09RIK | 0.28703115  |
| ILMN_2445666 |                | C030033M12RIK | 0.28703069  |
| ILMN_2659440 | NM_026846.2    | ZFAND2B       | 0.287017539 |
| ILMN_2964608 | NM_023740.1    | ZDHHC16       | 0.286901471 |
| ILMN_2638337 |                | RBBP6         | 0.286776519 |
| ILMN_2421119 | NM_009418.2    | TPP2          | 0.286763809 |
| ILMN_2825905 | NM_001033220.1 | AU021092      | 0.286756577 |
| ILMN_1218433 | XM_125901.8    | CAND1         | 0.286751758 |
| ILMN_1259760 |                | 1810064L21RIK | 0.286636163 |
| ILMN_2910221 | NM_146234.2    | TMEM32        | 0.286494899 |
| ILMN_3121784 | NM_212473.1    | A930008G19RIK | 0.286448742 |
| ILMN_2447100 |                | D15MIT260     | 0.286445308 |

|              |                |               |             |
|--------------|----------------|---------------|-------------|
| ILMN_2429215 | NM_026698.2    | TMEM129       | 0.286128662 |
| ILMN_2700233 | NM_007635.3    | CCNG2         | 0.285932283 |
| ILMN_2460043 | NM_138631.1    | TSSC4         | 0.285878266 |
| ILMN_2431398 | XM_001476904.1 | 2810001G20RIK | 0.285828832 |
| ILMN_2910684 | NM_145387.2    | ATHL1         | 0.285724686 |
| ILMN_2822321 | NM_025915.2    | TMEM88        | 0.285595183 |
| ILMN_2674712 | NM_173189.2    | MCPH1         | 0.285394799 |
| ILMN_2795677 | NM_001033457.1 | GM1040        | 0.28534147  |
| ILMN_3150296 | NM_025988.2    | ACBD4         | 0.285293631 |
| ILMN_2824599 | NM_028922.1    | PPAPDC2       | 0.285226553 |
| ILMN_1239775 |                | CCNC          | 0.2851655   |
| ILMN_2612369 | NM_138659.2    | PRPF8         | 0.285142325 |
| ILMN_2525025 | NM_207269.1    | D330050I23RIK | 0.285122232 |
| ILMN_1238644 | NM_183195.1    | MARVELD1      | 0.285085166 |
| ILMN_2607377 | NM_008409.2    | ITM2A         | 0.285078986 |
| ILMN_3001452 | NM_018788.2    | EXTL3         | 0.284987783 |
| ILMN_2720092 | NM_198027.2    | ALKBH6        | 0.284800254 |
| ILMN_1223843 |                | B930095G10RIK | 0.284758393 |
| ILMN_2536776 | NM_001015681.1 | E130308A19RIK | 0.284730375 |
| ILMN_1235400 |                | 4732474K08RIK | 0.284633819 |
| ILMN_1245461 | NM_133992.2    | USP52         | 0.28450647  |
| ILMN_2736925 | NM_029236.1    | BCDIN3D       | 0.284495068 |
| ILMN_2698361 | NM_031405.1    | ARS2          | 0.284493339 |
| ILMN_1254950 |                | 1110020N13RIK | 0.284470912 |
| ILMN_2923707 | NM_001040130.1 | TMEM141       | 0.284346192 |
| ILMN_2843782 | NM_009419.2    | TPST2         | 0.284327974 |
| ILMN_2992009 | NM_022654.1    | LRDD          | 0.284206335 |
| ILMN_2900025 | NM_010887.1    | NDUFS4        | 0.284206125 |
| ILMN_2628828 | NM_029834.3    | PPP1R12C      | 0.284050911 |
| ILMN_2946817 | NR_002445.2    | BC002163      | 0.28404488  |
| ILMN_1221258 |                | 2900093K20RIK | 0.283893072 |
| ILMN_2941431 | NM_027541.2    | PRPF3         | 0.283852284 |
| ILMN_2736221 | XR_034510.1    | LOC100048056  | 0.283812744 |
| ILMN_2660551 | NM_010689.2    | LAT           | 0.283787934 |
| ILMN_1223524 | XM_920267.3    | LOC239690     | 0.283786835 |
| ILMN_2598478 | NM_011430.2    | SNCG          | 0.283597954 |
| ILMN_1240854 | XM_136166.3    | LOC237234     | 0.283556558 |
| ILMN_1240770 | NM_134037.2    | ACLY          | 0.283541057 |
| ILMN_2673599 | NM_021895.2    | ACTN4         | 0.283493561 |
| ILMN_1239677 | NM_027360.2    | 2010107E04RIK | 0.283322694 |
| ILMN_2771182 |                | H2-Q8         | 0.283313357 |
| ILMN_1257694 |                | CD8B          | 0.28325236  |
| ILMN_2759058 | NM_009543.1    | RNF103        | 0.283132223 |
| ILMN_1215717 |                | NAP1L1        | 0.283019965 |
| ILMN_3048492 | NM_176839.1    | ABCC5         | 0.283010757 |
| ILMN_2650492 | NM_026295.2    | CTDP1         | 0.283003283 |

|              |                |                  |             |
|--------------|----------------|------------------|-------------|
| ILMN_3155274 | NM_011668.2    | UBE3A            | 0.282813839 |
| ILMN_1233813 | NM_009280.1    | SS18             | 0.282635703 |
| ILMN_2508945 | NM_001017959.1 | LAMP2            | 0.282325465 |
| ILMN_1218128 |                | 2310079P03RIK    | 0.282242206 |
| ILMN_1237264 | NM_027925.3    | TRSPAP1          | 0.281977981 |
| ILMN_2743780 | XM_150227.8    | MSL2L1           | 0.281958185 |
| ILMN_2681583 | NM_028995.3    | NPAL3            | 0.281944085 |
| ILMN_2933834 | NM_144860.2    | MIB1             | 0.281900316 |
| ILMN_2825848 | NM_172499.1    | MFSD9            | 0.281850292 |
| ILMN_2709585 | XM_132538.6    | 5830411G16RIK    | 0.281822767 |
| ILMN_2690621 | NM_133234.1    | BBC3             | 0.281766059 |
| ILMN_1245858 | XM_887671.3    | EG623230         | 0.281572121 |
| ILMN_2681492 | NM_025808.3    | LZTR1            | 0.281563041 |
| ILMN_2672698 | NM_178045.3    | RASSF4           | 0.281525522 |
| ILMN_2697433 | NM_172608.1    | TMEM184B         | 0.281417069 |
| ILMN_1232569 |                | B230326O19RIK    | 0.281397909 |
| ILMN_2625342 | XM_001472856.1 | LOC100044576     | 0.281251373 |
| ILMN_2874853 | NM_018796.2    | EEF1B2           | 0.281184344 |
| ILMN_3004386 | NM_008056.2    | FZD6             | 0.281022105 |
| ILMN_2646878 | NM_178645.3    | BLMH             | 0.280897038 |
| ILMN_1217309 | NM_029564.2    | TAX1BP3          | 0.280831917 |
| ILMN_2518785 |                | E230025E14RIK    | 0.280806911 |
| ILMN_2617265 | NM_146152.2    | IPO13            | 0.280683049 |
| ILMN_2978525 | NM_181516.2    | TAZ              | 0.280576176 |
| ILMN_2432886 | XM_001480068.1 | LOC100043126     | 0.280573578 |
| ILMN_2599110 | NM_001013378.1 | USPL1            | 0.280539029 |
| ILMN_1230193 | NM_019752.2    | HTRA2            | 0.280442276 |
| ILMN_2625654 | NR_003618.1    | MSL3L2           | 0.280276763 |
| ILMN_2657728 | NM_011503.2    | STXBP2           | 0.280194259 |
| ILMN_1231094 | NM_027188.3    | SMYD3            | 0.280148002 |
| ILMN_3078349 | NM_001004190.3 | ZFP560           | 0.279902495 |
| ILMN_2653575 |                | DPH2L1           | 0.279895347 |
| ILMN_1251519 | NM_144824.1    | BC021790         | 0.279752278 |
| ILMN_1216020 | NM_145226.2    | OAS3             | 0.279561988 |
| ILMN_2422169 |                | MJ-5000-150_4562 | 0.279546421 |
| ILMN_2599570 | NM_175400.5    | SEPHS1           | 0.279402109 |
| ILMN_2750864 |                | 2210013O21RIK    | 0.279271089 |
| ILMN_1259356 | NM_133741.1    | SNRK             | 0.279263279 |
| ILMN_2757224 | NM_025527.2    | SRP19            | 0.279253194 |
| ILMN_2601441 | NM_172741.2    | 4931406P16RIK    | 0.279208325 |
| ILMN_2943818 | NM_010413.2    | HDAC6            | 0.279015489 |
| ILMN_2820831 | NM_170671.1    | MYCBPAP          | 0.27898449  |
| ILMN_2643513 | NM_012055.3    | ASNS             | 0.278866689 |
| ILMN_1223966 | XM_359014.1    | LOC385959        | 0.278659282 |
| ILMN_2997382 | NM_028832.1    | MTERFD3          | 0.278531732 |
| ILMN_2506757 | XM_001480149.1 | LOC100048280     | 0.278467841 |

|              |                |               |             |
|--------------|----------------|---------------|-------------|
| ILMN_2528052 | XM_358572.1    | LOC381420     | 0.278340747 |
| ILMN_2663367 | NM_198933.2    | POU2F1        | 0.278333342 |
| ILMN_2700833 | NM_177777.4    | D11WSU47E     | 0.278186339 |
| ILMN_2817714 | NM_028841.1    | TSPAN17       | 0.278099158 |
| ILMN_2685958 | NM_001081103.1 | STIM2         | 0.277938997 |
| ILMN_2881857 | NM_018764.1    | PCDH7         | 0.277906887 |
| ILMN_2847950 | NM_134149.1    | AI837181      | 0.27789761  |
| ILMN_2502798 | NM_001009573.2 | UNC13D        | 0.277727279 |
| ILMN_2777104 | NM_138589.2    | UBFD1         | 0.277624852 |
| ILMN_3161206 | NM_001001130.2 | ZFP85-RS1     | 0.277601111 |
| ILMN_1252270 | NM_001080977.1 | RSBN1L        | 0.277398975 |
| ILMN_2802952 | NM_145618.3    | NARG2         | 0.277364268 |
| ILMN_1249943 |                | 6430530L21RIK | 0.27720467  |
| ILMN_2624938 | NM_008556.1    | PEA15         | 0.277198372 |
| ILMN_2939990 | NM_009319.1    | TARBP2        | 0.277193934 |
| ILMN_2550189 |                | 1700113I01RIK | 0.276921071 |
| ILMN_1254737 | NM_133346.2    | ASB6          | 0.276894902 |
| ILMN_1225029 | NM_153546.3    | MBOAT1        | 0.276892069 |
| ILMN_1228163 | NM_013588.1    | LRRC23        | 0.276861658 |
| ILMN_1234955 |                | 6430573H23RIK | 0.276782144 |
| ILMN_2619836 | NM_025966.3    | 2310039H08RIK | 0.276704147 |
| ILMN_2987294 | NM_134091.1    | SGSM3         | 0.27654567  |
| ILMN_2651077 | NM_026381.3    | SCOTIN        | 0.276514191 |
| ILMN_2989955 | NM_009755.2    | BMP1          | 0.276455781 |
| ILMN_1228470 | NM_020271.3    | PDXP          | 0.276453026 |
| ILMN_2876775 | NM_028281.1    | PCBD2         | 0.276398167 |
| ILMN_1238562 | NM_008743.1    | NTHL1         | 0.276357408 |
| ILMN_1255050 | NM_178408.2    | ARRDC1        | 0.276176715 |
| ILMN_2655273 | NM_198936.1    | SLU7          | 0.276155754 |
| ILMN_1232093 | XM_359173.1    | LOC386330     | 0.276025785 |
| ILMN_2668387 | NM_178647.2    | CGGBP1        | 0.275972526 |
| ILMN_2553916 |                | 4732462K23RIK | 0.275768585 |
| ILMN_1225712 | NM_010490.2    | IAP           | 0.275685079 |
| ILMN_2895067 | NM_001033275.1 | GLT8D3        | 0.275670007 |
| ILMN_2640453 | NM_026464.2    | WDR55         | 0.275659221 |
| ILMN_1254549 | NM_027446.2    | 5730409G15RIK | 0.275647897 |
| ILMN_1223447 | NM_001024616.1 | B230208H17RIK | 0.275633823 |
| ILMN_1253077 | NM_012017.2    | ZFP346        | 0.275611015 |
| ILMN_2649937 | NM_023312.2    | NDUFA13       | 0.275388911 |
| ILMN_1212902 | NM_009003.2    | RAB4A         | 0.275371296 |
| ILMN_2632092 | NM_181595.3    | PPP1R9A       | 0.27532551  |
| ILMN_2884869 | NM_023884.2    | RALGPS2       | 0.275293936 |
| ILMN_1249278 | NM_001012400.1 | AU02252       | 0.275281526 |
| ILMN_1250709 | NM_025559.2    | 1810046J19RIK | 0.275248181 |
| ILMN_2975375 | NM_026849.1    | MTMR14        | 0.275245329 |
| ILMN_1226639 |                | BC006779      | 0.275174924 |

|              |                |               |             |
|--------------|----------------|---------------|-------------|
| ILMN_2420465 | XM_912161.3    | ZFP703        | 0.275029383 |
| ILMN_2826027 | NM_180600.1    | UBE2Q2        | 0.274978619 |
| ILMN_2821014 | NM_013897.1    | TIMM8B        | 0.274950759 |
| ILMN_1226800 | NM_021893.2    | CD274         | 0.274804211 |
| ILMN_2938893 | NM_016769.2    | SMAD3         | 0.274692058 |
| ILMN_2939185 | NM_001001493.2 | BC056474      | 0.274521029 |
| ILMN_1250630 | NM_026259.2    | RNF41         | 0.274430678 |
| ILMN_2613558 | NM_028015.2    | LASS5         | 0.274361527 |
| ILMN_2863514 | NM_147065.1    | OLFR1390      | 0.274355219 |
| ILMN_1230082 | NM_030559.2    | VPS16         | 0.274271016 |
| ILMN_2739527 | NM_025910.2    | MINA          | 0.274178217 |
| ILMN_2689025 | XM_001478713.1 | LOC100047707  | 0.274149816 |
| ILMN_1255416 | NM_010738.2    | LY6A          | 0.274146701 |
| ILMN_2417945 | NM_009547.2    | ZFP161        | 0.274146418 |
| ILMN_2593859 | XM_134059.2    | PPAPDC1       | 0.2741002   |
| ILMN_2680903 | NM_183148.1    | C79267        | 0.274032123 |
| ILMN_2723524 | NM_013769.2    | TJP3          | 0.274024102 |
| ILMN_1231996 | NM_054051.1    | PIP4K2B       | 0.273986325 |
| ILMN_2698334 | NM_178098.2    | 4930486L24RIK | 0.273899082 |
| ILMN_3150677 | NM_011468.4    | SPRR2A        | 0.273844645 |
| ILMN_1246305 | NM_012000.2    | CLN8          | 0.273703145 |
| ILMN_1216409 | NM_001081005.1 | 1500012F01RIK | 0.273658655 |
| ILMN_2862338 | NM_001033235.1 | TRIM40        | 0.273564665 |
| ILMN_2731228 | NM_026005.2    | 2610301B20RIK | 0.273469117 |
| ILMN_1218325 | XR_034614.1    | LOC675228     | 0.273383598 |
| ILMN_2531139 | XM_288828.2    | LOC332300     | 0.273357933 |
| ILMN_2699635 | NM_024287.3    | RAB6          | 0.273336464 |
| ILMN_2746086 | NM_029564.2    | TAX1BP3       | 0.27324051  |
| ILMN_2604423 | XM_914705.3    | EG545216      | 0.273175898 |
| ILMN_1223949 | NM_009903.1    | CLDN4         | 0.273093365 |
| ILMN_2845039 | NM_010123.2    | EIF3S10       | 0.27301938  |
| ILMN_3150159 | NM_007830.3    | DBI           | 0.27299232  |
| ILMN_2568516 |                | RBPMS         | 0.272990338 |
| ILMN_2642147 | NM_016768.1    | PBX3          | 0.272989748 |
| ILMN_2568269 |                | A130099L09RIK | 0.27294297  |
| ILMN_1250278 | NM_172713.2    | SDAD1         | 0.272892515 |
| ILMN_2435392 |                | DNASE2A       | 0.272866625 |
| ILMN_2972325 | NM_023633.1    | 2410016O06RIK | 0.272866157 |
| ILMN_2972627 | NM_025798.2    | HINT3         | 0.27276659  |
| ILMN_2780876 | NM_207220.1    | GPR137        | 0.272749442 |
| ILMN_1233412 | NM_007916.1    | DDX19A        | 0.272643559 |
| ILMN_2416701 |                | A730004F22RIK | 0.272241958 |
| ILMN_3103439 | NM_001026211.1 | DNAJC19       | 0.27217453  |
| ILMN_2604814 | NM_023304.1    | FGF22         | 0.272065675 |
| ILMN_2925066 | NM_023140.3    | TXNL2         | 0.272024022 |
| ILMN_1215233 | NM_026198.1    | TMEM167B      | 0.271892782 |



|              |                |               |             |
|--------------|----------------|---------------|-------------|
| ILMN_2532099 | XM_987385.1    | EG333830      | 0.271839248 |
| ILMN_2772288 | NM_026866.2    | DISP1         | 0.271651733 |
| ILMN_1236648 |                | A430073A17RIK | 0.271463789 |
| ILMN_2760088 | NM_008759.1    | OG9X          | 0.271444243 |
| ILMN_2593872 |                | MRPS15        | 0.271317411 |
| ILMN_2703171 | NM_009707.3    | ARHGAP6       | 0.271286573 |
| ILMN_2693815 | NM_030880.1    | PACSIN3       | 0.271205226 |
| ILMN_3162476 | NM_016906.4    | SEC61A1       | 0.271203345 |
| ILMN_3123341 | NR_001570.1    | XIST          | 0.271168192 |
| ILMN_3154810 | NM_011416.2    | SMARCA2       | 0.271131203 |
| ILMN_1243991 | XM_917865.2    | LOC433476     | 0.271085697 |
| ILMN_1242500 | NM_021536.6    | RHOT1         | 0.27099082  |
| ILMN_2713449 | NM_028148.2    | SFRS2IP       | 0.27094287  |
| ILMN_1225370 | NM_178909.4    | WDR92         | 0.270859676 |
| ILMN_2481071 |                | HRAS1         | 0.270850712 |
| ILMN_2962511 | NM_028976.2    | GORASP1       | 0.270838343 |
| ILMN_2969435 | NM_009206.1    | SLC4A1AP      | 0.270794449 |
| ILMN_2609809 | NM_024171.1    | SEC61B        | 0.270642711 |
| ILMN_2806029 | NM_011358.1    | SFRS2         | 0.270515726 |
| ILMN_2686463 |                | 0610010F05RIK | 0.270489086 |
| ILMN_2819929 | NM_011961.1    | PLOD2         | 0.270344564 |
| ILMN_2694659 | NM_029437.1    | CKAP5         | 0.270272991 |
| ILMN_2742420 | NM_153176.4    | SPG7          | 0.270205167 |
| ILMN_2757716 | NM_144935.1    | BC018242      | 0.270185202 |
| ILMN_3107945 | NM_029606.3    | CCDC46        | 0.270175474 |
| ILMN_1249068 |                | 2410044A07RIK | 0.269922203 |
| ILMN_1236889 | NM_011347.1    | SELP          | 0.269846718 |
| ILMN_1251808 |                | CAPN10        | 0.269705741 |
| ILMN_2652394 | NM_013736.4    | TCEB3         | 0.269694285 |
| ILMN_2652260 | NM_144911.1    | RPAP2         | 0.269678996 |
| ILMN_2438078 | NM_025324.2    | ZFP524        | 0.269574192 |
| ILMN_2749143 | XM_147329.1    | 2810428I15RIK | 0.269426628 |
| ILMN_2681293 |                | Sept6         | 0.269370789 |
| ILMN_1256951 | NM_001081111.1 | TMF1          | 0.269253691 |
| ILMN_3162499 | NM_028427.2    | TMEM192       | 0.269199752 |
| ILMN_1220793 | NM_025717.3    | RBM4B         | 0.269164183 |
| ILMN_2817996 | NM_146141.1    | PPA2          | 0.269058728 |
| ILMN_1228849 |                | HIST2H2AA1    | 0.26905492  |
| ILMN_1244242 |                | ALDH4A1       | 0.26898668  |
| ILMN_2708222 | NM_178420.2    | NLRX1         | 0.268906503 |
| ILMN_2944301 | NM_025462.2    | ECE2          | 0.268865882 |
| ILMN_1221548 | XM_358872.1    | LOC385662     | 0.268553855 |
| ILMN_2652663 |                | CRK           | 0.26855015  |
| ILMN_1246382 |                | 2010204K13RIK | 0.268512422 |
| ILMN_2444121 | XM_001477560.1 | LOC100041797  | 0.268327141 |
| ILMN_3111298 | NM_139295.2    | MCFD2         | 0.268324217 |

|              |                |               |             |
|--------------|----------------|---------------|-------------|
| ILMN_2849359 | NM_026753.1    | 1110019N10RIK | 0.268223402 |
| ILMN_2746210 | NM_016706.2    | COIL          | 0.268219285 |
| ILMN_2756157 | NM_153134.2    | IRGQ          | 0.268215223 |
| ILMN_1216852 | NM_011398.1    | SLC25A14      | 0.268166663 |
| ILMN_1257784 | XM_359160.1    | LOC386288     | 0.268134154 |
| ILMN_2664950 | NM_011078.2    | PHF2          | 0.268119948 |
| ILMN_2760765 | NM_145382.3    | BC021381      | 0.268077192 |
| ILMN_1242239 | NM_031405.1    | ARS2          | 0.267896232 |
| ILMN_2612079 | NM_133626.2    | RRBP1         | 0.26789413  |
| ILMN_1217061 | NM_015733.4    | CASP9         | 0.267756351 |
| ILMN_1224158 | XM_147236.2    | LOC224163     | 0.267696697 |
| ILMN_2711000 | NM_001033537.2 | PERLD1        | 0.267625262 |
| ILMN_1244545 |                | 6330444G18RIK | 0.267599673 |
| ILMN_1236049 | NM_178051.3    | MTERFD2       | 0.267293264 |
| ILMN_2948663 | NM_029475.1    | ADAL          | 0.267244371 |
| ILMN_2595842 | NM_027185.2    | DEF6          | 0.267220851 |
| ILMN_3109573 | NM_001013023.2 | MTERF         | 0.267084715 |
| ILMN_1227386 | NM_025446.1    | AIG1          | 0.267055375 |
| ILMN_1220219 | NM_009446.2    | TUBA3A        | 0.266993298 |
| ILMN_2726308 | NM_026308.2    | RPP21         | 0.266879073 |
| ILMN_3009579 | NM_145951.2    | COVA1         | 0.266869299 |
| ILMN_1258658 | NM_175322.2    | D130072O21RIK | 0.266811074 |
| ILMN_1222821 | NM_133185.2    | ROGDI         | 0.266742539 |
| ILMN_2978878 | NM_153542.1    | LRRC20        | 0.266639841 |
| ILMN_2772410 |                | ANXA4         | 0.266626185 |
| ILMN_2863903 | NM_021313.1    | RNF25         | 0.266556936 |
| ILMN_2788065 | NM_029810.2    | NT5C2         | 0.266363179 |
| ILMN_2683316 | NM_007798.2    | CTSB          | 0.266117595 |
| ILMN_1230065 | XM_147335.2    | LOC245892     | 0.266071583 |
| ILMN_2787844 | NM_012032.2    | SERINC3       | 0.265736647 |
| ILMN_1237089 | NM_008060.1    | GANAB         | 0.26568556  |
| ILMN_2620844 | NM_133840.2    | CLP1          | 0.265633306 |
| ILMN_2909211 | NM_029619.2    | MSRB2         | 0.265615125 |
| ILMN_2700334 | NM_018772.1    | BRI3          | 0.265548877 |
| ILMN_2509962 | NM_020497.1    | ZFP276        | 0.265417251 |
| ILMN_2445165 | NM_009504.2    | VDR           | 0.265384085 |
| ILMN_2834915 | NM_011396.2    | SLC22A5       | 0.265365415 |
| ILMN_1251504 | NM_133969.2    | CYP4V3        | 0.265341954 |
| ILMN_2692351 | NM_001081030.1 | SBF1          | 0.265218732 |
| ILMN_2603693 | NM_172894.2    | SAPS1         | 0.265064637 |
| ILMN_1235962 | NM_133255.1    | HOOK2         | 0.264935728 |
| ILMN_2612255 | NM_008535.2    | LYL1          | 0.264893272 |
| ILMN_1233848 | NM_201244.1    | COPG          | 0.264870633 |
| ILMN_1224678 | NM_029626.1    | GLT8D1        | 0.26463481  |
| ILMN_2876575 | NM_024432.2    | UBXN6         | 0.264540881 |
| ILMN_2626653 | NM_019502.2    | FXC1          | 0.264468704 |

|              |                |               |             |
|--------------|----------------|---------------|-------------|
| ILMN_2550822 |                | AFG3L1        | 0.264418583 |
| ILMN_2467096 | XM_001474888.1 | B430105G09RIK | 0.264297032 |
| ILMN_1225723 | NM_028091.3    | OSGEPL1       | 0.264222851 |
| ILMN_2689667 | NM_025346.1    | RMND5B        | 0.263976389 |
| ILMN_2597248 |                | ABCB9         | 0.263949637 |
| ILMN_2507044 | XM_001002437.1 | HCFC2         | 0.263813232 |
| ILMN_1254814 | NM_009905.1    | CLK1          | 0.263787008 |
| ILMN_1249708 | NM_020494.2    | DDX24         | 0.263785868 |
| ILMN_2859678 | NM_023479.1    | ELAC2         | 0.263773441 |
| ILMN_2600729 | XM_001473268.1 | LOC100044696  | 0.263474771 |
| ILMN_2798255 | NM_019543.2    | PIGP          | 0.263440057 |
| ILMN_1237299 | NM_010991.1    | OLFR49        | 0.263425726 |
| ILMN_1248737 | XM_001474642.1 | 4930481A15RIK | 0.263327149 |
| ILMN_1244995 |                | C430015A10RIK | 0.263213513 |
| ILMN_1214118 | NM_031257.2    | PLEKHA2       | 0.263198471 |
| ILMN_2634841 | NM_198303.2    | EIF5B         | 0.263176654 |
| ILMN_2711562 | NM_008846.2    | PIP5K1B       | 0.263021482 |
| ILMN_2495939 | NM_013919.3    | USP21         | 0.263004697 |
| ILMN_2438771 | NM_001033389.2 | FUBP3         | 0.262995082 |
| ILMN_1241909 | NM_146091.3    | ATL3          | 0.262976981 |
| ILMN_1243140 | XR_032875.1    | LOC668164     | 0.262760913 |
| ILMN_2482672 | NM_001039493.1 | PLEKHM3       | 0.262729189 |
| ILMN_1258239 | NM_025343.2    | 0610042C05RIK | 0.262695532 |
| ILMN_2453051 | NM_023500.2    | XK            | 0.262657863 |
| ILMN_2657467 | NM_001039387.1 | NELF          | 0.262558163 |
| ILMN_2470360 |                | BC037704      | 0.262519549 |
| ILMN_1227596 | NM_026784.2    | PMVK          | 0.262494955 |
| ILMN_2763679 | NM_172579.1    | SIPA1L1       | 0.262491972 |
| ILMN_3136593 | NM_001024713.1 | 2610042L04RIK | 0.262342194 |
| ILMN_2943476 | NM_025304.3    | LCMT1         | 0.262096818 |
| ILMN_2733733 | NM_011905.2    | TLR2          | 0.26203971  |
| ILMN_3070533 | NM_029862.1    | 5930434B04RIK | 0.262006345 |
| ILMN_2446032 | XM_131566.5    | USP24         | 0.261942406 |
| ILMN_1228366 | NM_007671.2    | CDKN2C        | 0.26194191  |
| ILMN_2876302 | NM_198608.2    | AARS2         | 0.261929915 |
| ILMN_1255854 | NM_001081230.1 | MTAP9         | 0.261809359 |
| ILMN_2600309 | NM_153176.4    | SPG7          | 0.261767042 |
| ILMN_1240146 | NM_133673.3    | TOR1B         | 0.261687711 |
| ILMN_2951407 | NM_172205.1    | SBSN          | 0.261641003 |
| ILMN_2515830 |                | 2210410E06RIK | 0.261477455 |
| ILMN_1238939 | NM_153121.1    | LYSMD1        | 0.261472889 |
| ILMN_2690756 | NM_008636.3    | MTF1          | 0.261388108 |
| ILMN_2936351 | NM_010771.3    | MATR3         | 0.26131575  |
| ILMN_1213680 | NM_177462.4    | ZMYM6         | 0.261298852 |
| ILMN_1232451 | XM_129968.4    | PHLPP         | 0.261296809 |
| ILMN_2856599 | NM_016681.2    | CHEK2         | 0.261231311 |

|              |                |               |             |
|--------------|----------------|---------------|-------------|
| ILMN_2673790 | NM_145425.2    | AV249152      | 0.261165515 |
| ILMN_2600389 | NM_178798.3    | SLC7A6        | 0.261162842 |
| ILMN_2680111 | NM_025578.4    | MRPS25        | 0.261140943 |
| ILMN_3140913 | NM_198664.3    | TBC1D2        | 0.261035969 |
| ILMN_2833614 | NM_001007575.1 | ZFP817        | 0.261025448 |
| ILMN_2743524 | NM_175402.3    | 1810017N16RIK | 0.261015402 |
| ILMN_1218014 | NM_019704.2    | TMEM115       | 0.261002132 |
| ILMN_1215908 | NM_001081417.1 | CHD7          | 0.260836346 |
| ILMN_2430374 | NM_009457.3    | UBA1          | 0.260787299 |
| ILMN_2660175 | NM_015797.3    | FBXO6         | 0.260770953 |
| ILMN_2654679 | XR_032179.1    | LOC100040671  | 0.260755762 |
| ILMN_2594807 | NM_025762.1    | 4933434E20RIK | 0.260751152 |
| ILMN_2706495 | NM_173347.2    | PRUNE         | 0.260680333 |
| ILMN_1247633 | NM_011981.4    | ZFP260        | 0.260430209 |
| ILMN_2680329 | NM_026921.4    | ISCA1         | 0.260416702 |
| ILMN_1247823 | NM_001080926.1 | LRP8          | 0.260349861 |
| ILMN_1255699 |                | TBL2          | 0.260302093 |
| ILMN_2706853 | NM_029153.1    | SCAMP1        | 0.259922174 |
| ILMN_2872639 | NM_027815.2    | 9030624J02RIK | 0.259866086 |
| ILMN_1224589 | NM_026013.2    | TMEM77        | 0.259847276 |
| ILMN_2666690 | NM_025611.5    | CUL7          | 0.259814096 |
| ILMN_1254883 | NM_024183.4    | FIP1L1        | 0.259733343 |
| ILMN_1240420 | NM_001085355.1 | ARID1B        | 0.259702334 |
| ILMN_2715661 | NM_026951.2    | PEX11C        | 0.259661201 |
| ILMN_1249467 | NM_172413.2    | RAP2C         | 0.259605317 |
| ILMN_2599764 | NM_146376.2    | OLFR323       | 0.259439996 |
| ILMN_2527733 | NM_001033298.2 | GM114         | 0.259311662 |
| ILMN_2975377 | NM_026849.1    | MTMR14        | 0.25928836  |
| ILMN_2881791 | NM_178802.2    | TRIM65        | 0.259274468 |
| ILMN_1250910 | NM_001039394.1 | RAB43         | 0.259226018 |
| ILMN_3142602 | NM_019420.1    | B3GALT4       | 0.259223549 |
| ILMN_2547346 |                | PCP2          | 0.259179498 |
| ILMN_1242976 |                | C130072N01RIK | 0.259046396 |
| ILMN_1216601 | NM_027728.2    | 4933434I06RIK | 0.258963776 |
| ILMN_3144761 | NM_026787.1    | 1110012L19RIK | 0.258946752 |
| ILMN_2672353 | NM_153551.1    | DENND1C       | 0.258857465 |
| ILMN_3008497 | NM_144522.2    | TBC1D10B      | 0.258675368 |
| ILMN_1256012 | NM_181326.3    | ZFP521        | 0.25863161  |
| ILMN_2702061 | NM_146116.1    | TUBB2C        | 0.25861826  |
| ILMN_1212797 |                | SYNJ2         | 0.258434727 |
| ILMN_2477243 | NM_177643.2    | ZFP281        | 0.25835505  |
| ILMN_1239601 | XM_913466.2    | LOC637711     | 0.2582535   |
| ILMN_2994779 | NM_134118.1    | GPSN2         | 0.258233352 |
| ILMN_2877706 | NM_023524.1    | TFPT          | 0.258113738 |
| ILMN_3136809 | NM_001077359.1 | GIT2          | 0.258047409 |
| ILMN_2726690 |                | IVNS1ABP      | 0.257944162 |

|              |                |               |             |
|--------------|----------------|---------------|-------------|
| ILMN_1222474 | NM_011399.3    | SLC25A17      | 0.257943447 |
| ILMN_2482290 | NM_144825.2    | TAOK1         | 0.257853223 |
| ILMN_2977193 | NM_013925.2    | ADAT1         | 0.257832427 |
| ILMN_1253142 | NM_025633.3    | METAPL1       | 0.257746592 |
| ILMN_2804407 | NM_029588.1    | 1700012L04RIK | 0.257744894 |
| ILMN_2800256 | NM_144835.4    | HEATR1        | 0.257601317 |
| ILMN_2953098 | NM_026229.1    | GPR89         | 0.25753948  |
| ILMN_1245112 | NM_145954.1    | ALDH16A1      | 0.257511672 |
| ILMN_1228288 |                | A230057M07RIK | 0.25746763  |
| ILMN_1235423 | NM_009886.2    | CELSR1        | 0.25744981  |
| ILMN_2974601 | NM_027278.1    | 2810432D09RIK | 0.257355312 |
| ILMN_2629690 | XM_132974.3    | IPO8          | 0.25729978  |
| ILMN_2818396 | NM_026362.1    | 5033414D02RIK | 0.257298488 |
| ILMN_2665889 | NM_172380.3    | KTELC1        | 0.257209118 |
| ILMN_2605307 |                | BB128963      | 0.257143537 |
| ILMN_2839682 | NM_201646.1    | BTBD6         | 0.257138206 |
| ILMN_1214053 | NM_009564.1    | ZFP64         | 0.257105006 |
| ILMN_1218378 | NM_199316.2    | 4922501C03RIK | 0.257089764 |
| ILMN_2552732 |                | 9030216K14RIK | 0.257015027 |
| ILMN_2762056 | NM_025772.3    | DTNBP1        | 0.257005267 |
| ILMN_2783429 | NM_133761.2    | DCP1A         | 0.256780063 |
| ILMN_2694275 | NM_016753.4    | LXN           | 0.256760727 |
| ILMN_3160234 | NM_001033820.2 | ZFP551        | 0.25665809  |
| ILMN_2469294 |                | BICD2         | 0.256581649 |
| ILMN_1232084 | NM_029148.1    | TXNDC13       | 0.256503376 |
| ILMN_3062133 | NM_053193.1    | CPSF1         | 0.256499908 |
| ILMN_1228937 | NM_180962.1    | CYHR1         | 0.25648338  |
| ILMN_2938179 | NM_183275.1    | 1110002N22RIK | 0.256437361 |
| ILMN_2839569 | NM_022325.3    | CTSZ          | 0.256328251 |
| ILMN_2833985 | NM_030259.1    | RILPL2        | 0.25631199  |
| ILMN_2593554 | NM_018738.3    | IGTP          | 0.256310278 |
| ILMN_2847502 | NM_145606.1    | PCOLN3        | 0.256216178 |
| ILMN_1232711 | NM_146570.2    | OLFR1006      | 0.256210714 |
| ILMN_2687828 | NM_007880.1    | ARID3A        | 0.256168207 |
| ILMN_1251729 | NM_008686.2    | NFE2L1        | 0.256152663 |
| ILMN_2736848 | NM_029068.2    | SNX16         | 0.256117892 |
| ILMN_2736714 | NM_028849.1    | CLDND2        | 0.256087868 |
| ILMN_2896552 | NM_013898.1    | TIMM8A1       | 0.255975681 |
| ILMN_1231420 | NM_133852.2    | GOLGA2        | 0.255884964 |
| ILMN_2476303 |                | 1700008F19RIK | 0.255884722 |
| ILMN_2597886 | NM_130796.3    | SNX18         | 0.25570736  |
| ILMN_1249417 | NM_178939.2    | PDRG1         | 0.255697502 |
| ILMN_2610234 | NM_008357.1    | IL15          | 0.255412009 |
| ILMN_1246876 |                | KIT           | 0.2553917   |
| ILMN_1251333 | NM_019749.3    | GABARAP       | 0.255366293 |
| ILMN_3153614 | NM_027415.2    | TMEM70        | 0.255081969 |

|              |                |               |             |
|--------------|----------------|---------------|-------------|
| ILMN_2790113 | NM_026401.1    | MRP63         | 0.255032901 |
| ILMN_1247505 | NM_009296.1    | SUPT4H1       | 0.2550053   |
| ILMN_1214213 | NM_015754.2    | RBBP9         | 0.254967615 |
| ILMN_2724702 | NM_198615.1    | RKHD1         | 0.254948818 |
| ILMN_2561408 |                | A530026H04RIK | 0.254945697 |
| ILMN_2637066 | NM_026753.2    | 1110019N10RIK | 0.254847721 |
| ILMN_1219563 | NM_001005385.1 | GPRASP1       | 0.254662671 |
| ILMN_1232762 | NM_009720.2    | ATOX1         | 0.254576368 |
| ILMN_2726315 | NM_011341.4    | SDF4          | 0.254494024 |
| ILMN_1230032 | XM_357735.1    | EG384596      | 0.254284247 |
| ILMN_3163001 | NM_145470.2    | DEPDC6        | 0.254225027 |
| ILMN_2829636 | NM_013760.3    | DNAJB9        | 0.25387397  |
| ILMN_2974720 | NM_183029.1    | IGF2BP2       | 0.253817119 |
| ILMN_2749448 | NM_153119.2    | PLEKHO2       | 0.253665232 |
| ILMN_3072957 | NM_001029890.1 | MEX3A         | 0.253548482 |
| ILMN_3133085 | NM_001044747.1 | ZFP68         | 0.253412497 |
| ILMN_2939652 | NM_019414.2    | SELENBP2      | 0.253304643 |
| ILMN_1234604 | NM_029282.1    | 2610036D13RIK | 0.253220359 |
| ILMN_3141499 | NM_028720.2    | 3930401K13RIK | 0.253194318 |
| ILMN_3122961 | NM_010260.1    | GBP2          | 0.253191348 |
| ILMN_2762728 | NM_130864.3    | ACAA1A        | 0.253172048 |
| ILMN_1248465 | NM_175126.3    | ZCCHC3        | 0.253099829 |
| ILMN_2810047 | NM_172015.1    | IARS          | 0.252785384 |
| ILMN_2733888 | NM_011543.3    | SKP1A         | 0.252673318 |
| ILMN_2915059 | NM_138306.1    | DGKZ          | 0.252562912 |
| ILMN_2602542 |                | LRMP          | 0.252465234 |
| ILMN_1228040 | NM_027275.3    | PTCD3         | 0.252454895 |
| ILMN_1214412 | NM_133738.1    | ANTXR2        | 0.252094715 |
| ILMN_1215606 | NM_021337.2    | SKIV2L        | 0.252084243 |
| ILMN_2664726 | XM_203393.1    | 3110013H01RIK | 0.252075229 |
| ILMN_1233987 |                | 1110014O20RIK | 0.25203456  |
| ILMN_1247954 | NM_177166.2    | 9930014A18RIK | 0.251976299 |
| ILMN_2841917 | NM_001037916.1 | LOC622665     | 0.251937404 |
| ILMN_2805071 | NM_021710.1    | AP4S1         | 0.25186076  |
| ILMN_2688236 | NM_016745.2    | ATP2A3        | 0.251860377 |
| ILMN_2735276 | NM_001001335.1 | PLEKHA8       | 0.25164956  |
| ILMN_1245609 | NM_009163.2    | SGPL1         | 0.251639714 |
| ILMN_1242309 |                | A630054L15RIK | 0.25158331  |
| ILMN_2551827 |                | DNCIC2        | 0.251572884 |
| ILMN_2922544 | NM_009682.2    | AP3S2         | 0.251502739 |
| ILMN_2652721 | NM_028238.6    | RAB38         | 0.251496912 |
| ILMN_1225414 | NM_024456.2    | RAB5C         | 0.251390586 |
| ILMN_3132666 | NM_175489.3    | OSBPL8        | 0.251359504 |
| ILMN_2439453 | NM_133218.1    | ZFP704        | 0.251337922 |
| ILMN_2805829 | NM_144886.1    | EXOSC2        | 0.251199982 |
| ILMN_2424703 | NM_001099637.1 | CEP170        | 0.25116388  |

|              |                |               |             |
|--------------|----------------|---------------|-------------|
| ILMN_2580412 |                | D430034D15RIK | 0.251024127 |
| ILMN_1250382 | NM_133224.1    | ATP13A1       | 0.251018757 |
| ILMN_3162771 | NM_029248.1    | TAF1D         | 0.250935407 |
| ILMN_3140383 | NM_008301.4    | HSPA2         | 0.250869024 |
| ILMN_2972541 | NM_199011.1    | DGKQ          | 0.25071264  |
| ILMN_2642624 | NM_199365.1    | 5330438I03RIK | 0.250692341 |
| ILMN_1232073 | NM_133206.2    | ZNRF1         | 0.250672597 |
| ILMN_2923736 | NM_175150.3    | TXNDC15       | 0.25064117  |
| ILMN_2556182 |                | ASK-PENDING   | 0.25055995  |
| ILMN_1227608 | XR_005131.2    | A930033H14RIK | 0.250270352 |
| ILMN_2664779 | NM_033371.2    | PPP1R16A      | 0.250236185 |
| ILMN_2557387 |                | E430005I09RIK | 0.250088221 |
| ILMN_1244790 | NM_001005868.1 | ERBB2IP       | 0.250061514 |
| ILMN_2821254 | NM_145627.1    | RBM10         | 0.250054629 |
| ILMN_3099055 | NM_001039557.1 | 4922505G16RIK | 0.250029479 |
| ILMN_3028981 | NM_001042557.1 | MAP2K7        | 0.249935444 |
| ILMN_3002571 | NM_030218.1    | 9130017N09RIK | 0.249856533 |
| ILMN_2603953 | NM_016737.1    | STIP1         | 0.249797989 |
| ILMN_2968211 | NM_010706.1    | LGALS4        | 0.249700499 |
| ILMN_2791059 | NM_028870.1    | CLTB          | 0.249670534 |
| ILMN_2881039 | NM_198011.1    | E430018J23RIK | 0.249658226 |
| ILMN_2791357 | NM_172672.2    | GANC          | 0.249384533 |
| ILMN_2995454 | NM_011383.1    | SIX5          | 0.249349917 |
| ILMN_2884050 | NM_023138.3    | MAP2K2        | 0.249342301 |
| ILMN_3037668 | NM_054057.4    | PROSC         | 0.24922578  |
| ILMN_2454195 | NM_018879.1    | TUSC4         | 0.249209323 |
| ILMN_1223552 |                | FBN1          | 0.24919791  |
| ILMN_3144984 | NM_007487.3    | ARL4A         | 0.249112247 |
| ILMN_2643159 | NM_019812.1    | SIRT1         | 0.249095949 |
| ILMN_1251170 | NM_033565.1    | AFF4          | 0.249068244 |
| ILMN_1233991 | NM_172583.2    | TMEM63C       | 0.249007563 |
| ILMN_2455089 | XM_001475552.1 | LOC100046087  | 0.249000194 |
| ILMN_1232585 |                | B930097J01RIK | 0.24896587  |
| ILMN_2741899 | NM_177214.4    | ASCC3L1       | 0.248907719 |
| ILMN_2716358 | NM_194339.1    | BMS1          | 0.248719412 |
| ILMN_2653881 | XM_001479635.1 | LOC100048020  | 0.2486368   |
| ILMN_2891583 | NM_178396.3    | CAR12         | 0.24830766  |
| ILMN_3005212 | NM_146169.1    | PAIP2B        | 0.248245117 |
| ILMN_1231383 | NM_175244.3    | HECTD3        | 0.248172493 |
| ILMN_1220846 | NM_198616.2    | CCDC85B       | 0.248101277 |
| ILMN_1224117 | NM_144873.2    | UHRF2         | 0.247842923 |
| ILMN_3129526 | NM_133247.2    | USP33         | 0.247839452 |
| ILMN_2755059 | NM_133749.2    | 2900064A13RIK | 0.24773305  |
| ILMN_2705367 | NM_147151.1    | EHMT2         | 0.247711885 |
| ILMN_2622163 | NM_010256.2    | GART          | 0.247704712 |
| ILMN_2938704 | NM_008357.1    | IL15          | 0.247693422 |

|              |                |               |             |
|--------------|----------------|---------------|-------------|
| ILMN_1232447 | NM_008898.1    | POR           | 0.247679771 |
| ILMN_2430813 |                | PDLIM7        | 0.247573435 |
| ILMN_2607609 | NM_029887.2    | YIF1B         | 0.247310413 |
| ILMN_2790636 | NM_009120.2    | SAR1A         | 0.247268381 |
| ILMN_2805029 | NM_016890.2    | DCTN3         | 0.24726516  |
| ILMN_2424983 |                | C030014I23RIK | 0.2471284   |
| ILMN_2880906 | NM_145978.1    | PDLIM2        | 0.247087012 |
| ILMN_2911307 | NM_001005420.1 | GM347         | 0.247020652 |
| ILMN_1250501 | NM_010147.3    | EPN1          | 0.2469879   |
| ILMN_1230327 | XM_356873.1    | LOC383099     | 0.24694802  |
| ILMN_1213364 | XM_915073.1    | LOC638892     | 0.246874587 |
| ILMN_2895753 | NM_001004139.1 | ZFP619        | 0.246841692 |
| ILMN_2493338 |                | C630022N07RIK | 0.246834072 |
| ILMN_2998135 | NM_053069.2    | ATG5          | 0.246791647 |
| ILMN_1249344 | NM_029748.2    | 2510006D16RIK | 0.246783662 |
| ILMN_1249949 | NM_021542.4    | KCNK5         | 0.246721335 |
| ILMN_1217984 | NM_133975.4    | TRIP12        | 0.246472704 |
| ILMN_3096250 | NM_181329.2    | COIL          | 0.246382135 |
| ILMN_2998807 | NM_199018.1    | STARD8        | 0.246340411 |
| ILMN_2793281 | NM_020003.1    | 0610031J06RIK | 0.246323424 |
| ILMN_1232900 | XM_901486.2    | 2310001H12RIK | 0.246312754 |
| ILMN_2898135 | NM_028868.1    | CXXC1         | 0.246247555 |
| ILMN_2684667 | NM_026958.2    | 1810035L17RIK | 0.246211745 |
| ILMN_2900910 | NM_010860.2    | MYL6          | 0.246143389 |
| ILMN_2488000 |                | 5730601F06RIK | 0.245847311 |
| ILMN_2630768 | NM_021538.1    | COPE          | 0.245690749 |
| ILMN_2485839 | NM_011610.3    | TNFRSF1B      | 0.245599669 |
| ILMN_1238486 | NM_009982.3    | CTSC          | 0.245576469 |
| ILMN_2597909 | XM_133979.7    | PPFIA1        | 0.245574077 |
| ILMN_2781798 | NM_001033297.1 | GM561         | 0.245506875 |
| ILMN_1239133 | NM_008451.2    | KLC2          | 0.245259625 |
| ILMN_2424027 | NM_001081319.1 | C030046E11RIK | 0.245223822 |
| ILMN_2992541 | NM_025516.2    | ERGIC3        | 0.245202643 |
| ILMN_2635240 | NM_139302.1    | SH3GLB2       | 0.245101816 |
| ILMN_3158341 | NM_001080548.1 | USP6NL        | 0.244939936 |
| ILMN_2701654 | NM_176953.3    | LIG4          | 0.244920632 |
| ILMN_2862706 | NM_010393.1    | H2-Q5         | 0.2448048   |
| ILMN_2908846 | NM_027711.1    | IQGAP2        | 0.244482639 |
| ILMN_2788546 | NM_011778.1    | CORO1B        | 0.244095901 |
| ILMN_2592496 | NM_153530.1    | DIS3L2        | 0.244078724 |
| ILMN_2539337 | XM_355767.1    | LOC381770     | 0.244066329 |
| ILMN_3160468 | NM_001033436.1 | ATXN7L1       | 0.244028573 |
| ILMN_2640401 | NM_013625.1    | PAFAH1B1      | 0.243907077 |
| ILMN_1216182 | NM_028341.2    | 2810439F02RIK | 0.243565455 |
| ILMN_2683794 | NM_010952.2    | OAZ2          | 0.243540381 |
| ILMN_2907115 | NM_175146.2    | TSR2          | 0.243532615 |



|              |                |               |             |
|--------------|----------------|---------------|-------------|
| ILMN_2940440 | NM_008060.1    | GANAB         | 0.24347773  |
| ILMN_2688135 | NM_172284.4    | DDX19B        | 0.243331328 |
| ILMN_2756686 | NM_172401.2    | 1110057K04RIK | 0.243309876 |
| ILMN_1225859 | NM_027143.2    | 9130227C08RIK | 0.243307823 |
| ILMN_1218868 | NM_133805.3    | COPS8         | 0.243222725 |
| ILMN_1247482 |                | CCNC          | 0.243127838 |
| ILMN_2642681 | NM_009716.2    | ATF4          | 0.243024503 |
| ILMN_1258688 | NM_028763.3    | CBX6          | 0.242908445 |
| ILMN_2755668 | NM_019456.1    | APBB1IP       | 0.242852297 |
| ILMN_2770492 |                | ALG2          | 0.24277238  |
| ILMN_2665681 | NM_009963.3    | CRY2          | 0.242752409 |
| ILMN_2616612 | XM_126502.4    | 2010008E23RIK | 0.242673832 |
| ILMN_2560343 |                | A330019B12RIK | 0.242577674 |
| ILMN_2933168 | NM_019866.1    | SPIB          | 0.242552946 |
| ILMN_2473718 | NM_001033439.2 | LRCH1         | 0.24237347  |
| ILMN_2457571 | XM_001481278.1 | MAML2         | 0.242356807 |
| ILMN_2758803 | NM_029331.2    | 1700019G17RIK | 0.242331074 |
| ILMN_1256219 | XR_033381.1    | LOC100047261  | 0.242186508 |
| ILMN_1230276 |                | 4933425L03RIK | 0.242168918 |
| ILMN_1233784 | NM_001008498.2 | WDR34         | 0.242081904 |
| ILMN_3094023 | NM_144889.2    | PSMF1         | 0.24206979  |
| ILMN_2669146 | NM_194341.1    | AP1GBP1       | 0.24206323  |
| ILMN_2536188 | XM_357295.1    | LOC383856     | 0.242034332 |
| ILMN_1224692 | NM_030697.2    | KANK3         | 0.242020522 |
| ILMN_2621901 | XM_894155.2    | BC004022      | 0.241969752 |
| ILMN_1247867 |                | HRB2          | 0.241967373 |
| ILMN_1256905 | NM_013497.3    | CREB3         | 0.241913285 |
| ILMN_2747687 | NM_010822.2    | MPG           | 0.241905879 |
| ILMN_2782082 | NM_008410.1    | ITM2B         | 0.24184513  |
| ILMN_2775514 |                | EXT2          | 0.241843765 |
| ILMN_2744492 | NM_173390.3    | NHSL1         | 0.241745611 |
| ILMN_2656359 | NM_172676.2    | SAMD10        | 0.241723236 |
| ILMN_1224982 |                | 5730550L01RIK | 0.241657156 |
| ILMN_1217454 | NM_010685.3    | LAMP2         | 0.241604885 |
| ILMN_3163027 | NM_145421.1    | FAM108A       | 0.241161028 |
| ILMN_3107607 | NM_021494.1    | DENND5A       | 0.241098712 |
| ILMN_2726174 | NM_178632.4    | INTS7         | 0.241035862 |
| ILMN_1230162 | NM_010193.3    | FEM1B         | 0.241014    |
| ILMN_1259252 | NM_010730.2    | ANXA1         | 0.240939037 |
| ILMN_2990144 | NM_153414.2    | D14ERTD231E   | 0.240936272 |
| ILMN_2607608 | XM_284281.2    | 9430029K10RIK | 0.240865805 |
| ILMN_2512928 | XM_001001408.2 | LOC677213     | 0.240832018 |
| ILMN_2800813 | NM_023341.2    | CABC1         | 0.240756252 |
| ILMN_2734290 | NM_024205.1    | 1200003C05RIK | 0.240734961 |
| ILMN_1253850 | NM_001081103.1 | STIM2         | 0.240700786 |
| ILMN_3142224 | NM_197979.2    | 1110020P15RIK | 0.240577084 |

|              |                |               |             |
|--------------|----------------|---------------|-------------|
| ILMN_2604789 | NM_020483.3    | SAP30BP       | 0.240566335 |
| ILMN_1222806 | NM_145956.2    | BRCC3         | 0.240255982 |
| ILMN_2639402 | NM_025464.2    | TMEM218       | 0.240213289 |
| ILMN_2684848 | NM_199015.2    | D14ERTD668E   | 0.240191055 |
| ILMN_2737523 | NM_007975.3    | F2RL3         | 0.240156595 |
| ILMN_1231132 | NM_025646.3    | CRLS1         | 0.240052823 |
| ILMN_1219532 |                | E230013N04RIK | 0.240000462 |
| ILMN_2533109 | XM_993488.1    | LOC672441     | 0.239991582 |
| ILMN_1240408 |                | RBL1          | 0.239894252 |
| ILMN_2623754 | NM_001081430.1 | NAT12         | 0.239739588 |
| ILMN_2736379 | NM_177176.2    | NFIA          | 0.239697682 |
| ILMN_1260009 | NM_080595.1    | EMID1         | 0.239663422 |
| ILMN_2624713 | XM_915307.3    | MAST4         | 0.23952773  |
| ILMN_1253294 | NM_026079.2    | IKBKAP        | 0.239488533 |
| ILMN_2647172 | NM_023475.2    | SERHL         | 0.239471384 |
| ILMN_1249348 | NM_018786.1    | PRPF40B       | 0.239465294 |
| ILMN_2853409 | NM_023854.1    | ARFGAP2       | 0.23942653  |
| ILMN_2749487 | NM_020022.2    | RFC2          | 0.239391692 |
| ILMN_1232379 | NM_177658.3    | B230339M05RIK | 0.239359016 |
| ILMN_1249579 | NM_009410.2    | TOP3A         | 0.239284988 |
| ILMN_2839142 | NM_133998.1    | 1810008A18RIK | 0.239064466 |
| ILMN_1256792 |                | 2610028H07RIK | 0.239001716 |
| ILMN_1220315 | NM_001003916.1 | ZC4H2         | 0.238956265 |
| ILMN_2427349 | NM_011749.4    | ZFP148        | 0.238863961 |
| ILMN_2997308 | NM_010364.1    | GTF2H4        | 0.238734668 |
| ILMN_1217599 | NM_016858.2    | RAB33B        | 0.238698006 |
| ILMN_2763115 | NM_177613.2    | CDC34         | 0.23866191  |
| ILMN_1218494 | NM_133247.2    | USP33         | 0.238403396 |
| ILMN_2656909 | NM_028288.3    | CUL4B         | 0.238403056 |
| ILMN_2622146 | NM_033609.2    | MED15         | 0.238360764 |
| ILMN_2733542 | XM_001473206.1 | LOC100044862  | 0.238250162 |
| ILMN_2893187 | NM_207670.1    | GRIPAP1       | 0.23803022  |
| ILMN_2726448 | NM_175325.2    | BBS4          | 0.237962253 |
| ILMN_2777474 | NM_010398.1    | H2-T23        | 0.237888609 |
| ILMN_2941430 | NM_027541.2    | PRPF3         | 0.237855578 |
| ILMN_2637233 | NM_012021.2    | PRDX5         | 0.237716217 |
| ILMN_2545299 |                | 4921533J23RIK | 0.237665347 |
| ILMN_1213531 | NM_028320.3    | ADIPOR1       | 0.237585076 |
| ILMN_2507227 | NM_172121.1    | ZC3H3         | 0.23756421  |
| ILMN_2650725 | NM_198113.2    | SSH3          | 0.237393313 |
| ILMN_2862379 | NM_007485.2    | RHOD          | 0.237372123 |
| ILMN_2975455 | NM_178257.1    | IL22RA1       | 0.237346084 |
| ILMN_2681123 | NM_172656.5    | SYRADB        | 0.23727566  |
| ILMN_3158265 | NM_001025093.1 | ATF2          | 0.237243024 |
| ILMN_1253150 | NM_152812.2    | OTUD6B        | 0.237005931 |
| ILMN_2686353 | NM_017465.1    | SULT2B1       | 0.236930335 |

|              |                |               |             |
|--------------|----------------|---------------|-------------|
| ILMN_3104289 | NM_001044371.1 | RAD17         | 0.236883815 |
| ILMN_2757861 | NM_026193.1    | AP4B1         | 0.236879622 |
| ILMN_2952114 | NM_019710.1    | SMC1A         | 0.23680657  |
| ILMN_1232667 | NM_030694.1    | IFITM2        | 0.236791936 |
| ILMN_2851429 | NM_207213.1    | SNX25         | 0.236757283 |
| ILMN_1259939 | NM_018880.2    | TRIM3         | 0.23674096  |
| ILMN_2656677 | NM_010223.1    | FKBP8         | 0.236737384 |
| ILMN_1249776 | NM_013564.5    | INSL3         | 0.236581237 |
| ILMN_3142573 | NM_001045483.1 | MAPK1IP1      | 0.236340599 |
| ILMN_2783940 | NM_175183.2    | ATXN7L2       | 0.236263528 |
| ILMN_2717727 | NM_010418.2    | HERC2         | 0.236255395 |
| ILMN_2875163 | NM_134002.1    | CSNK1G2       | 0.236185279 |
| ILMN_2652890 | NM_019762.1    | PKP3          | 0.236099889 |
| ILMN_2678755 | NM_026517.2    | RPL22L1       | 0.236053428 |
| ILMN_3136789 | NM_029512.2    | TTPAL         | 0.235952324 |
| ILMN_2987862 | NM_011066.1    | PER2          | 0.235809313 |
| ILMN_1242377 | NM_033398.2    | JMJD6         | 0.235755105 |
| ILMN_2622780 |                | 5530601I19RIK | 0.235700469 |
| ILMN_2667614 | NM_025368.3    | JOSD2         | 0.23565648  |
| ILMN_2441909 | NM_194334.2    | TBC1D2B       | 0.235623848 |
| ILMN_2892310 | NM_021547.1    | STARD3        | 0.235577806 |
| ILMN_2833356 | NM_138757.1    | 4933424B01RIK | 0.23554888  |
| ILMN_2991545 | NM_138601.1    | D10JHU81E     | 0.235449185 |
| ILMN_3161250 | NM_001033202.3 | USP30         | 0.2353437   |
| ILMN_2713396 | NM_207522.1    | BC067068      | 0.235146724 |
| ILMN_1225615 | NM_031405.1    | ARS2          | 0.235059281 |
| ILMN_1240323 | NM_018808.1    | DNAJB1        | 0.235032329 |
| ILMN_2444662 |                | 2900037O03RIK | 0.235008029 |
| ILMN_2457372 |                | 2610009I02RIK | 0.234998021 |
| ILMN_2639375 | NM_011840.2    | MAP2K5        | 0.234929486 |
| ILMN_2587929 | XM_354778.1    | 2210408I21RIK | 0.234840966 |
| ILMN_2772492 | NM_177325.3    | TSR1          | 0.234703184 |
| ILMN_2421220 | NM_145125.2    | BRWD1         | 0.234649476 |
| ILMN_1230587 | NM_134152.3    | LPXN          | 0.234318453 |
| ILMN_1235795 | XM_001477076.1 | LOC675594     | 0.234003918 |
| ILMN_1231229 | NM_013605.1    | MUC1          | 0.23399327  |
| ILMN_2536913 | XM_357391.1    | LOC384054     | 0.233825176 |
| ILMN_2660485 | NM_054089.3    | TGS1          | 0.233813815 |
| ILMN_2812164 | NM_029926.3    | IRAK4         | 0.233808987 |
| ILMN_2733887 | NM_021462.3    | MKNK2         | 0.233701988 |
| ILMN_2863264 | NM_146012.1    | CTDSP2        | 0.233456127 |
| ILMN_2971486 | NM_023162.3    | ZNRD1         | 0.233431989 |
| ILMN_1237279 | NM_008089.1    | GATA1         | 0.233339734 |
| ILMN_2519789 | NM_009542.2    | ZFP101        | 0.233274623 |
| ILMN_2712873 | NM_029787.2    | CYB5R3        | 0.233200845 |
| ILMN_2757569 | NM_007933.2    | ENO3          | 0.233182531 |

|              |                |               |             |
|--------------|----------------|---------------|-------------|
| ILMN_2978570 | NM_172697.1    | PRPF38A       | 0.233173655 |
| ILMN_2722131 | XM_916282.3    | 5430411K18RIK | 0.232963909 |
| ILMN_2740806 | NM_009980.4    | CTBP2         | 0.232697078 |
| ILMN_2698494 | NM_020045.2    | NFU1          | 0.232591406 |
| ILMN_2851710 | NM_007714.2    | CLK4          | 0.232585752 |
| ILMN_1260446 | NM_009441.2    | TTC3          | 0.232466907 |
| ILMN_2774580 |                | 4933437N03RIK | 0.232465756 |
| ILMN_1222599 | XM_001479450.1 | ZUBR1         | 0.232273415 |
| ILMN_1219577 | NM_025859.1    | ARL1          | 0.232202694 |
| ILMN_2962701 | NM_001011741.1 | OLFR1386      | 0.232172472 |
| ILMN_2791326 | NM_009143.2    | SDF2          | 0.232098689 |
| ILMN_1259606 | NM_026622.2    | 3110057O12RIK | 0.232017416 |
| ILMN_2734484 | NM_025319.2    | 0610009B22RIK | 0.231950509 |
| ILMN_2568488 |                | A530089A20RIK | 0.231843791 |
| ILMN_1258867 | NM_175933.2    | PEX5          | 0.231797629 |
| ILMN_2508639 | NM_133817.2    | ZFP451        | 0.231655699 |
| ILMN_1227785 |                | 6030413G23RIK | 0.231601919 |
| ILMN_1220575 |                | 2610010G17RIK | 0.231575056 |
| ILMN_2664909 | NM_030705.4    | MESDC1        | 0.231559898 |
| ILMN_2760593 | NM_172669.2    | D030051N19RIK | 0.231538911 |
| ILMN_2876554 | NM_025291.1    | SRA1          | 0.231408318 |
| ILMN_2603581 | NM_025338.3    | AURKAIP1      | 0.231397971 |
| ILMN_1215469 | NM_007830.3    | DBI           | 0.231347689 |
| ILMN_1242212 | NM_001081183.1 | 1110037F02RIK | 0.231338401 |
| ILMN_1233167 |                | ARL10C        | 0.231075441 |
| ILMN_3004142 | NM_021420.2    | STK4          | 0.231057975 |
| ILMN_2602630 | NM_177041.3    | FLAD1         | 0.230917619 |
| ILMN_3007813 | NM_175238.4    | RIF1          | 0.230904164 |
| ILMN_2434503 | NM_019828.1    | TRPC4AP       | 0.230858664 |
| ILMN_2627350 | NM_010760.2    | MAGOH         | 0.23073577  |
| ILMN_2937122 | NM_175114.3    | TRAK1         | 0.230733418 |
| ILMN_2663576 | NM_138309.1    | MIC2L1        | 0.230628676 |
| ILMN_1242238 | XM_978542.1    | EG632802      | 0.230599354 |
| ILMN_1225300 | NM_181328.2    | SLC25A29      | 0.230510827 |
| ILMN_1254540 | NM_021449.2    | CRBN          | 0.2304989   |
| ILMN_3160475 | NM_009532.3    | XRCC1         | 0.230438748 |
| ILMN_1218347 | NM_139300.3    | MYLK          | 0.23040473  |
| ILMN_2603781 | NM_080837.1    | D17WSU104E    | 0.230398087 |
| ILMN_1232440 |                | 4930430F08RIK | 0.230337064 |
| ILMN_2738284 | NM_173033.3    | BC057893      | 0.230248398 |
| ILMN_1236042 | NM_019806.5    | VAPB          | 0.230160544 |
| ILMN_3033524 | NM_001025156.1 | CCDC93        | 0.229988694 |
| ILMN_2673936 | NM_029751.3    | RPL18A        | 0.229914713 |
| ILMN_2848353 | NM_177362.2    | ZFP771        | 0.229700116 |
| ILMN_2967362 | NM_172401.2    | 1110057K04RIK | 0.229699078 |
| ILMN_2552251 |                | 4632422H02RIK | 0.229636146 |

|              |                |                 |             |
|--------------|----------------|-----------------|-------------|
| ILMN_2751505 | NM_001025387.2 | BRD2            | 0.229633069 |
| ILMN_2815107 | NM_019650.2    | GOSR2           | 0.229467199 |
| ILMN_1213914 | NM_020582.2    | ATP5J2          | 0.229411683 |
| ILMN_2756030 | NM_011406.1    | SLC8A1          | 0.229214552 |
| ILMN_1237573 | NM_145452.2    | RASA1           | 0.229171421 |
| ILMN_1216950 | NM_174996.2    | D4ERTD22E       | 0.229125274 |
| ILMN_1230913 | NM_175224.4    | METAP1          | 0.228954125 |
| ILMN_2643723 | NM_026441.4    | PEF1            | 0.228931289 |
| ILMN_2529682 | XM_124427.4    | LOC230896       | 0.228628593 |
| ILMN_2625991 | NM_025337.2    | AKR7A5          | 0.228398682 |
| ILMN_1225015 | AK080946.1     | SCL0001828.1_20 | 0.228379632 |
| ILMN_2757916 | NM_026034.3    | ARMC10          | 0.228108044 |
| ILMN_2713464 | NM_134076.1    | ABHD4           | 0.228090314 |
| ILMN_2697092 | NM_001093759.1 | 2410002O22RIK   | 0.228037024 |
| ILMN_2953677 | NM_007915.1    | EI24            | 0.227963446 |
| ILMN_1226497 | NM_026641.1    | IFT80           | 0.22788596  |
| ILMN_2930364 | NM_011431.2    | EFTUD2          | 0.227809521 |
| ILMN_2647381 | NM_027323.1    | SRRD            | 0.227803514 |
| ILMN_2871412 | NM_011319.1    | SARS            | 0.227802446 |
| ILMN_2721399 | NM_009985.3    | CTSW            | 0.22770602  |
| ILMN_2742583 | NM_001081118.1 | PHRF1           | 0.227472887 |
| ILMN_2722129 | NM_019424.2    | HPS1            | 0.227466287 |
| ILMN_3124547 | NM_001007465.1 | RFFL            | 0.227435509 |
| ILMN_2682362 | NM_177367.2    | GEMIN4          | 0.227373889 |
| ILMN_2437856 | NM_024451.1    | UNC84A          | 0.22733113  |
| ILMN_1247465 | NM_001076791.2 | 9630025I21RIK   | 0.227239457 |
| ILMN_2707710 | NM_170598.2    | RBM12           | 0.227104572 |
| ILMN_2508745 | NM_026752.2    | ZFYVE21         | 0.227042636 |
| ILMN_2924831 | NM_008088.1    | GAS7            | 0.226849042 |
| ILMN_2673385 | NM_177311.3    | SERAC1          | 0.226672999 |
| ILMN_2926257 | NM_026181.1    | GPATCH1         | 0.226527186 |
| ILMN_1254199 | NM_008064.2    | GAA             | 0.226517155 |
| ILMN_3114585 | NM_001039150.1 | CD44            | 0.226492839 |
| ILMN_2608602 | NM_178700.4    | GRSF1           | 0.226421272 |
| ILMN_2600537 | NM_025618.2    | SRI             | 0.226195835 |
| ILMN_2971567 | NM_020494.2    | DDX24           | 0.226122948 |
| ILMN_2496817 | NM_013881.3    | ULK2            | 0.226058311 |
| ILMN_2722455 | NM_013768.2    | PRMT5           | 0.226055044 |
| ILMN_2969919 | NM_013876.2    | RNF11           | 0.22597165  |
| ILMN_2920549 | NM_009157.2    | MAP2K4          | 0.225854425 |
| ILMN_2675029 | NM_009208.2    | SLC4A3          | 0.225831146 |
| ILMN_2602581 | NM_025508.3    | GMPR            | 0.225498167 |
| ILMN_1214163 | NM_172772.2    | B230380D07RIK   | 0.225383067 |
| ILMN_3112873 | NM_001009935.2 | TXNIP           | 0.225316911 |
| ILMN_1237208 | NM_010684.2    | LAMP1           | 0.225217589 |
| ILMN_2877541 | NM_019922.1    | CRTAP           | 0.225009731 |

|              |                |                |             |
|--------------|----------------|----------------|-------------|
| ILMN_1217602 | XM_357615.1    | LOC384387      | 0.224757736 |
| ILMN_1244642 | NM_026070.2    | CCDC53         | 0.224751322 |
| ILMN_3148489 | NM_011046.2    | FURIN          | 0.224680775 |
| ILMN_1235574 | XM_355883.6    | 2310022K01RIK  | 0.224680261 |
| ILMN_2457773 |                | E330009J07RIK  | 0.224564987 |
| ILMN_2792560 | NM_025348.1    | NDUFA3         | 0.224533556 |
| ILMN_2907793 | NM_009145.1    | NPTN           | 0.224371181 |
| ILMN_1244977 | NM_010387.2    | H2-DMB1        | 0.224346987 |
| ILMN_1249242 | NM_009584.3    | DNAJC2         | 0.224201476 |
| ILMN_2841334 | NM_146224.4    | SUHW4          | 0.224195497 |
| ILMN_2707147 | NM_021329.2    | RANGRF         | 0.224073175 |
| ILMN_2599935 | NM_019836.1    | 2610024G14RIK  | 0.224027553 |
| ILMN_2674132 |                | FIBP           | 0.223813384 |
| ILMN_1229918 |                | 8030466K23RIK  | 0.22379967  |
| ILMN_2914796 | NM_175029.2    | ATG4C          | 0.223726779 |
| ILMN_1228750 | NM_001024699.1 | ZBTB45         | 0.223683737 |
| ILMN_2692341 | NM_146027.1    | SCRN2          | 0.22361695  |
| ILMN_1257209 | NM_153138.3    | WIPF1          | 0.223614355 |
| ILMN_2617305 | NM_025529.3    | NUDT8          | 0.223464172 |
| ILMN_2731974 | NM_008021.2    | FOXM1          | 0.223352948 |
| ILMN_1217148 |                | 6530406A20RIK  | 0.223147339 |
| ILMN_1231129 | NM_028459.1    | WASL           | 0.223082677 |
| ILMN_2748806 | NM_133791.4    | WWC2           | 0.222988905 |
| ILMN_2515536 |                | SCL000648.1_30 | 0.222950694 |
| ILMN_2814575 | NM_026532.2    | NUTF2          | 0.222923729 |
| ILMN_1245356 | NM_011421.1    | SMPD1          | 0.222881348 |
| ILMN_1217576 | NM_007963.1    | EVI1           | 0.222821267 |
| ILMN_2657980 | NM_010173.3    | FAAH           | 0.222711245 |
| ILMN_2920708 | NM_145931.1    | ZC3H7A         | 0.222684234 |
| ILMN_2774822 |                | BTBD6          | 0.222635688 |
| ILMN_2762925 | XM_001476332.1 | LOC100046259   | 0.222622359 |
| ILMN_1242881 | NM_019953.1    | CNPY2          | 0.222470467 |
| ILMN_3040816 | NM_029320.2    | PIBF1          | 0.222332867 |
| ILMN_2453874 | NM_001098227.1 | SDCBP          | 0.222324287 |
| ILMN_1227677 | XM_148134.1    | KELCHL         | 0.222258523 |
| ILMN_2465770 | NM_021522.2    | USP14          | 0.222172212 |
| ILMN_2970429 | NM_011675.1    | UCK1           | 0.222138652 |
| ILMN_2498779 | XM_150227.8    | MSL2L1         | 0.222041473 |
| ILMN_1241179 |                | 2810405F04RIK  | 0.222004315 |
| ILMN_2701435 | NM_175215.3    | LYSMD4         | 0.221867598 |
| ILMN_2671253 | NM_008179.2    | GSPT2          | 0.221720028 |
| ILMN_1229110 | NM_025796.2    | MRPL33         | 0.221502698 |
| ILMN_2738773 | NM_026746.2    | NSMCE2         | 0.221360557 |
| ILMN_2440807 | NM_001081102.1 | WHSC1          | 0.221236674 |
| ILMN_1226979 | XM_001479207.1 | LOC100042970   | 0.221234812 |
| ILMN_1219717 | NM_019972.2    | SORT1          | 0.221226233 |

|              |                |               |             |
|--------------|----------------|---------------|-------------|
| ILMN_2759309 | NM_030098.1    | RNASE6        | 0.221213184 |
| ILMN_2709456 | NM_133693.1    | RBM42         | 0.221208618 |
| ILMN_2656645 | NM_145923.4    | RELL1         | 0.221130257 |
| ILMN_2883138 | NM_020611.3    | SRD5A3        | 0.221083354 |
| ILMN_1235906 |                | B230206P06RIK | 0.22106441  |
| ILMN_1243394 | NM_145625.1    | EIF4B         | 0.221013113 |
| ILMN_1216301 | NM_011829.2    | IMPDH1        | 0.220787846 |
| ILMN_3004864 | NM_194342.1    | UNC84B        | 0.220749621 |
| ILMN_1242677 | NM_139272.2    | GALNT2        | 0.220744285 |
| ILMN_3143088 | NM_172754.2    | AI449175      | 0.220725306 |
| ILMN_2594468 | NM_027149.1    | 2310040A13RIK | 0.220422462 |
| ILMN_1240799 | NM_027740.5    | WDR51B        | 0.220334809 |
| ILMN_1249815 | NM_007475.4    | RPLP0         | 0.220236978 |
| ILMN_2987107 | NM_027342.1    | FAM162A       | 0.220075247 |
| ILMN_1236906 | NM_029976.2    | CDKN2AIPNL    | 0.220021721 |
| ILMN_2602406 | NM_025576.1    | 2810004N20RIK | 0.219780678 |
| ILMN_2743650 | NM_028385.1    | SETD5         | 0.219762542 |
| ILMN_2759563 | NM_028022.1    | 2410008K03RIK | 0.219749054 |
| ILMN_2971946 | NM_025520.2    | LSM5          | 0.219747257 |
| ILMN_2651886 | NM_008828.2    | PGK1          | 0.21964263  |
| ILMN_1221311 | NM_175274.3    | TTYH3         | 0.21962919  |
| ILMN_1227225 | NM_011588.2    | TRIM28        | 0.219524267 |
| ILMN_2778428 | NM_001008425.1 | THOC6         | 0.219442717 |
| ILMN_2634358 | NM_008628.2    | MSH2          | 0.219434081 |
| ILMN_2769877 |                | RECK          | 0.218815437 |
| ILMN_2791074 | NM_146039.3    | WDR60         | 0.218790061 |
| ILMN_2599997 | NM_011308.2    | NCOR1         | 0.218740837 |
| ILMN_2641278 | NM_133201.2    | MFN2          | 0.218738949 |
| ILMN_2780352 | NM_001033381.1 | D630014A15RIK | 0.218634499 |
| ILMN_1237581 |                | 0710007G10RIK | 0.218599418 |
| ILMN_2635850 | NM_026832.3    | CGRRF1        | 0.218512144 |
| ILMN_2498416 | NM_011751.2    | ZFP207        | 0.218422514 |
| ILMN_2795854 | NM_138743.2    | 1190017O12RIK | 0.218391709 |
| ILMN_2601590 | NM_019822.3    | ADRM1         | 0.218377051 |
| ILMN_3161828 | NM_011228.1    | RAB33A        | 0.218354386 |
| ILMN_2508001 |                | CLTC          | 0.218285419 |
| ILMN_2932474 | NM_026260.2    | TCTN3         | 0.218284197 |
| ILMN_1235365 | NM_175211.2    | RALGPS1       | 0.218263588 |
| ILMN_2652749 | NM_001038010.1 | KAT2A         | 0.218220241 |
| ILMN_1224811 |                | 4631416I11RIK | 0.218207373 |
| ILMN_1220230 |                | HBP1          | 0.218202912 |
| ILMN_2730797 | NM_013770.1    | SLC25A10      | 0.218162184 |
| ILMN_2721809 | NM_011951.2    | MAPK14        | 0.21781172  |
| ILMN_2615468 | NM_026218.2    | FGFR1OP2      | 0.217786359 |
| ILMN_2635516 | NM_174852.2    | PHF12         | 0.217757625 |
| ILMN_1246957 |                | BRAF          | 0.217678171 |

|              |                |                |             |
|--------------|----------------|----------------|-------------|
| ILMN_2635888 | NM_024203.3    | FAM120B        | 0.217539795 |
| ILMN_2920752 | NM_008488.1    | ARHGEF1        | 0.217353733 |
| ILMN_2519110 | AK049101.1     | SCL0003067.1_7 | 0.217292741 |
| ILMN_1246056 | NM_001038664.2 | GNGT2          | 0.21721489  |
| ILMN_2635976 | NM_133831.2    | GLTSCR2        | 0.217187316 |
| ILMN_2853508 | NM_025486.1    | TMEM208        | 0.217157539 |
| ILMN_2589792 | NM_011600.2    | TLE4           | 0.217153512 |
| ILMN_1214488 | NM_018858.2    | PEBP1          | 0.217054883 |
| ILMN_2691566 | NM_138303.1    | YIPF2          | 0.217042771 |
| ILMN_2716567 | NM_009761.2    | BNIP3L         | 0.216901947 |
| ILMN_2959037 | NM_134017.1    | MAT2B          | 0.216808063 |
| ILMN_1226527 | NM_172672.2    | GANC           | 0.216668428 |
| ILMN_2668886 | NM_172600.2    | 6720456H20RIK  | 0.216572434 |
| ILMN_2584381 |                | 8030447N19RIK  | 0.216543914 |
| ILMN_2708644 | NM_018796.2    | EEF1B2         | 0.216510963 |
| ILMN_1253808 | NM_011852.2    | OAS1G          | 0.216497624 |
| ILMN_1231853 | NM_144865.1    | REEP2          | 0.216439626 |
| ILMN_1233522 |                | 1110034O24RIK  | 0.216419794 |
| ILMN_3094013 | NM_175341.3    | MBNL2          | 0.216381195 |
| ILMN_1241522 | NM_030168.2    | 4921505C17RIK  | 0.216370369 |
| ILMN_2581241 |                | E030003O11RIK  | 0.216204873 |
| ILMN_2903364 | NM_009302.2    | SWAP70         | 0.215876616 |
| ILMN_2772582 |                | SMAD3          | 0.21586517  |
| ILMN_2501357 |                | DYRK1A         | 0.215819864 |
| ILMN_1249408 | NM_183256.2    | 2310016M24RIK  | 0.215649145 |
| ILMN_2707895 | NM_173001.1    | JMJD1A         | 0.215643956 |
| ILMN_2592093 | NM_018854.3    | IFT20          | 0.215591147 |
| ILMN_2984935 | NM_018739.1    | RP9            | 0.215529096 |
| ILMN_1254444 | NM_028002.2    | DUS4L          | 0.215387693 |
| ILMN_2599522 | NM_019396.2    | CYHR1          | 0.21531902  |
| ILMN_2418465 | NM_008138.4    | GNAI2          | 0.215315128 |
| ILMN_2828139 | NM_153802.3    | ZFP128         | 0.215265447 |
| ILMN_1247694 | NM_025844.2    | CHORDC1        | 0.215185738 |
| ILMN_1249922 | XM_993154.1    | PPP1R3E        | 0.215044016 |
| ILMN_2980466 | NM_008325.1    | IDUA           | 0.21501734  |
| ILMN_2904321 | NM_011785.2    | AKT3           | 0.214939062 |
| ILMN_2980044 | NM_018830.1    | ASAH2          | 0.214839079 |
| ILMN_2480596 |                | 9627219_371    | 0.214686903 |
| ILMN_2778530 | NM_145610.1    | PPAN           | 0.214661113 |
| ILMN_1244857 | NM_010261.2    | RABAC1         | 0.214604901 |
| ILMN_1216788 | NM_172773.2    | SLC17A5        | 0.214595414 |
| ILMN_2601379 | NM_178577.3    | MGC18837       | 0.214565816 |
| ILMN_1255527 |                | FMR1           | 0.214405808 |
| ILMN_1234738 | XM_001052081.2 | TMEM146        | 0.21438628  |
| ILMN_3022492 | NM_008688.3    | NFIC           | 0.214375676 |
| ILMN_1226143 | NM_019983.2    | RABGEF1        | 0.214264379 |



|              |                |               |             |
|--------------|----------------|---------------|-------------|
| ILMN_2437470 |                | 2810423A18RIK | 0.214247287 |
| ILMN_2604227 | NM_172755.2    | SFRS14        | 0.214067565 |
| ILMN_2986315 | NM_019580.3    | MIR16         | 0.213905598 |
| ILMN_2436815 |                | 2810402A17RIK | 0.213816506 |
| ILMN_1249524 | NM_013715.1    | COPS5         | 0.213809013 |
| ILMN_2677728 | NM_134130.1    | ABHD3         | 0.213453534 |
| ILMN_2645165 | NM_028643.3    | EFHA1         | 0.213363967 |
| ILMN_3139800 | NM_181280.1    | BRE           | 0.213247985 |
| ILMN_2717716 |                | RAPGEF5       | 0.213096511 |
| ILMN_1257394 | NM_172566.2    | RUNDC1        | 0.212924202 |
| ILMN_1242508 |                | PIN4          | 0.212918943 |
| ILMN_1237501 | NM_145840.3    | RGS9BP        | 0.21276003  |
| ILMN_1244188 | NM_173371.3    | H6PD          | 0.212565071 |
| ILMN_1243826 | NM_148927.1    | PLEKHA4       | 0.212549785 |
| ILMN_2629044 | NM_023202.3    | NDUFA7        | 0.212498333 |
| ILMN_2627300 | NM_194462.2    | AKAP9         | 0.21238289  |
| ILMN_2507182 | NM_172609.3    | TOMM22        | 0.212226939 |
| ILMN_2421275 | NM_172918.3    | ZFP317        | 0.212223778 |
| ILMN_1257576 | XM_356241.1    | LOC382145     | 0.21218396  |
| ILMN_2836924 | NM_172372.1    | WDR45         | 0.212130492 |
| ILMN_2596970 | NM_026407.2    | TMEM39A       | 0.212080032 |
| ILMN_2705966 | XM_132230.8    | SEC31A        | 0.212044784 |
| ILMN_1231971 | NM_144842.3    | ZMYM5         | 0.212038844 |
| ILMN_2436772 | NM_133907.3    | UBE3C         | 0.212006341 |
| ILMN_1232272 | NM_133708.3    | GMPPA         | 0.212004771 |
| ILMN_2917441 | NM_028188.1    | RUSC1         | 0.211956467 |
| ILMN_2613000 | NM_012043.2    | ISLR          | 0.211954958 |
| ILMN_2702243 | NM_183174.1    | HOMEZ         | 0.21195305  |
| ILMN_2663694 | NM_010887.1    | NDUFS4        | 0.211807048 |
| ILMN_1253813 | NM_153505.4    | NCKAP1L       | 0.211708357 |
| ILMN_2868579 | NM_020012.1    | RNF14         | 0.211706743 |
| ILMN_1228752 | NM_023627.1    | ISYNA1        | 0.211689392 |
| ILMN_2522693 | NM_178600.2    | VKORC1        | 0.211670335 |
| ILMN_2611261 | NM_016755.2    | ATP5J         | 0.211618967 |
| ILMN_1255376 | NM_026557.3    | RCHY1         | 0.211566374 |
| ILMN_2869225 | NM_009078.1    | RPL19         | 0.211546674 |
| ILMN_1235757 | NM_015740.2    | BLOC1S1       | 0.211499923 |
| ILMN_2426115 |                | 2310024N18RIK | 0.211486591 |
| ILMN_2781493 | NM_029498.2    | ZMYM2         | 0.211389138 |
| ILMN_2759749 | NM_025932.1    | SYAP1         | 0.21125107  |
| ILMN_2835012 | NM_025677.1    | 5730449L18RIK | 0.21124383  |
| ILMN_3025192 | NM_001081107.1 | HEL308        | 0.211092033 |
| ILMN_2765733 | NM_017462.2    | POLG          | 0.211051467 |
| ILMN_2849985 | NM_023060.3    | EEFSEC        | 0.211021538 |
| ILMN_3152594 | NM_029531.2    | ZFP60         | 0.210945    |
| ILMN_2453565 | NM_026112.3    | ZFP606        | 0.210809779 |

|              |             |               |             |
|--------------|-------------|---------------|-------------|
| ILMN_2649771 | NM_033072.2 | MBD6          | 0.210728536 |
| ILMN_2629897 | NM_028726.1 | 4632404H12RIK | 0.210669403 |
| ILMN_2935796 | NM_026395.1 | RER1          | 0.210636802 |
| ILMN_2635523 | XM_984472.1 | 4631422C13RIK | 0.210536565 |
| ILMN_1240083 | NM_172268.2 | NUP214        | 0.210378015 |
| ILMN_1257631 | NM_031159.3 | APOBEC1       | 0.210025754 |
| ILMN_2738264 | NM_024438.4 | DUSP19        | 0.209971857 |
| ILMN_2991660 | NM_027162.3 | MIF4GD        | 0.209896376 |
| ILMN_2768073 | NM_029922.2 | PARP6         | 0.209763148 |
| ILMN_1259737 | NM_178896.4 | DCUN1D4       | 0.209650731 |
| ILMN_2624749 | NM_133971.1 | ANKRD10       | 0.20961352  |
| ILMN_2895084 | NM_027264.3 | ZFP715        | 0.20957817  |
| ILMN_2748914 | NM_025948.2 | LSM14A        | 0.209495963 |
| ILMN_2756041 | NM_011099.2 | PKM2          | 0.209440943 |
| ILMN_2706652 | NM_026431.2 | 1810043G02RIK | 0.2094063   |
| ILMN_1217466 |             | 2610024H22RIK | 0.209328446 |
| ILMN_3076459 | NM_007808.3 | CYCS          | 0.209089997 |
| ILMN_2696711 | NM_008606.2 | MMP11         | 0.209052643 |
| ILMN_2685487 | NM_181594.2 | EDC4          | 0.208920617 |
| ILMN_2637630 | NM_145418.3 | BC013529      | 0.208874832 |
| ILMN_1236368 | NM_175423.3 | ORAI1         | 0.20887123  |
| ILMN_2749686 | NM_025950.2 | CDC37L1       | 0.208824635 |
| ILMN_2680549 | NM_029094.1 | PIK3CB        | 0.208597838 |
| ILMN_1214951 | NM_018740.1 | RAI12         | 0.208341172 |
| ILMN_2695150 |             | SMC5L1        | 0.208106129 |
| ILMN_3005587 | NM_029843.1 | 1700109H08RIK | 0.207999287 |
| ILMN_1225658 | NM_011908.1 | UBL3          | 0.207938781 |
| ILMN_1221624 | NM_134060.2 | SLC35B3       | 0.207759748 |
| ILMN_2454919 | NM_194343.1 | TRIM45        | 0.207639367 |
| ILMN_2761188 | XM_135030.4 | IBTK          | 0.20749813  |
| ILMN_2774701 | NM_172300.3 | UBE2Z         | 0.207413635 |
| ILMN_2947568 | NM_007836.1 | GADD45A       | 0.207336429 |
| ILMN_2749235 | NM_145465.1 | STK24         | 0.207328418 |
| ILMN_1222071 |             | C920004C08RIK | 0.207251157 |
| ILMN_2747229 | NM_029780.3 | RAF1          | 0.207135566 |
| ILMN_2790246 | NM_022331.1 | HERPUD1       | 0.206903822 |
| ILMN_1216117 |             | 4921514E18RIK | 0.206804454 |
| ILMN_3104414 | NM_026695.2 | ETFB          | 0.206703147 |
| ILMN_1260441 | NM_153780.1 | 2610044O15RIK | 0.206663842 |
| ILMN_2655429 | NM_177681.3 | ZFP12         | 0.206582278 |
| ILMN_1224990 |             | 9530048I18RIK | 0.206568395 |
| ILMN_2948945 | NM_144907.1 | SESN2         | 0.206445777 |
| ILMN_2596297 | NM_010027.1 | DDT           | 0.20643442  |
| ILMN_2522571 | NM_080793.5 | SETD7         | 0.206357216 |
| ILMN_2717045 | NM_016764.3 | PRDX4         | 0.206347148 |
| ILMN_2987863 | NM_011066.1 | PER2          | 0.206316447 |

|              |                |               |             |
|--------------|----------------|---------------|-------------|
| ILMN_1230048 | NM_011814.2    | FXR2          | 0.206263396 |
| ILMN_2640348 | NM_028839.3    | TMEM110       | 0.206250624 |
| ILMN_2508595 | NM_011755.2    | ZFP35         | 0.206135428 |
| ILMN_2585112 |                | 1200008A14RIK | 0.206095596 |
| ILMN_2776377 | NM_053198.2    | SFXN4         | 0.206046827 |
| ILMN_2496534 | NM_027357.2    | PSMD1         | 0.205914347 |
| ILMN_2971286 | NM_008913.1    | PPP3CA        | 0.205894742 |
| ILMN_2649129 | NM_012010.3    | EIF2S3X       | 0.205821647 |
| ILMN_2989364 | NM_001004149.1 | ZFP366        | 0.205786041 |
| ILMN_2781170 | NM_146144.2    | USP1          | 0.205699263 |
| ILMN_2449335 | NM_011750.1    | SF1           | 0.20566268  |
| ILMN_1237821 | XM_974905.2    | HECTD1        | 0.205619689 |
| ILMN_1243558 | NM_019721.2    | METTL3        | 0.205588012 |
| ILMN_2702857 | NM_020573.1    | OSBPL1A       | 0.205570861 |
| ILMN_2670601 | XM_001474115.1 | CARS2         | 0.20551644  |
| ILMN_2712066 | NM_025801.1    | PGD           | 0.205498604 |
| ILMN_2706477 | NM_031182.1    | TCFAP4        | 0.205016149 |
| ILMN_2932359 | NM_009415.1    | TPI1          | 0.204852963 |
| ILMN_1216689 | NM_009691.2    | APLP2         | 0.204832962 |
| ILMN_1220174 | NM_146156.2    | PDIK1L        | 0.204824012 |
| ILMN_2662831 | XM_979372.1    | LOC665181     | 0.204749136 |
| ILMN_2623032 | NM_007935.1    | EPC1          | 0.204308556 |
| ILMN_2639665 | NM_133345.2    | ING4          | 0.204222709 |
| ILMN_2421431 |                | STX12         | 0.204186534 |
| ILMN_2725595 | XM_126580.1    | THRA          | 0.204135349 |
| ILMN_1221931 | NM_022881.4    | RGS18         | 0.204111045 |
| ILMN_2975856 | NM_028774.1    | RNF6          | 0.203925388 |
| ILMN_1233313 |                | TRADD         | 0.203893009 |
| ILMN_2733482 | NM_145523.3    | GCA           | 0.203867631 |
| ILMN_2759770 | NM_199469.1    | NPLOC4        | 0.203843499 |
| ILMN_2716514 | NM_001005331.1 | EIF4G1        | 0.203798816 |
| ILMN_2848583 | NM_019758.2    | MTCH2         | 0.203749166 |
| ILMN_1235926 |                | A630072M18RIK | 0.203681117 |
| ILMN_2594644 | NM_029044.2    | LRRC48        | 0.203566262 |
| ILMN_2594128 | NM_176849.3    | ARGLU1        | 0.203529665 |
| ILMN_1247257 | NM_010274.2    | GPD2          | 0.20343918  |
| ILMN_1234618 |                | D630004K10RIK | 0.203397444 |
| ILMN_2629627 | NM_026434.3    | RBM18         | 0.203389169 |
| ILMN_2874554 | NM_175438.3    | ALDH4A1       | 0.203379019 |
| ILMN_2896483 | NM_015810.1    | POLG2         | 0.20336228  |
| ILMN_2680262 | NM_026329.2    | POLR2G        | 0.203341808 |
| ILMN_1213573 | NM_029862.3    | 5930434B04RIK | 0.203293198 |
| ILMN_1227235 | NM_013899.1    | TIMM10        | 0.203195772 |
| ILMN_1229500 | NM_008504.2    | GZMM          | 0.202987024 |
| ILMN_2672544 | NM_026229.3    | GPR89         | 0.20296993  |
| ILMN_1225252 | NM_030121.3    | ASB8          | 0.202943506 |

|              |                |               |             |
|--------------|----------------|---------------|-------------|
| ILMN_2788121 | NM_019682.2    | DYNLL1        | 0.202767796 |
| ILMN_2833495 | NM_009748.2    | BET1          | 0.202363277 |
| ILMN_2589999 |                | ARL10C        | 0.202326601 |
| ILMN_1222716 | NM_011890.4    | SGCB          | 0.202324579 |
| ILMN_2515431 |                | D730003I15RIK | 0.202299506 |
| ILMN_2814976 | NM_019661.2    | YKT6          | 0.202247093 |
| ILMN_2416791 |                | SPG20         | 0.202150623 |
| ILMN_2755666 |                | APBB1IP       | 0.2021138   |
| ILMN_2465338 | NM_133779.2    | PIGT          | 0.201974247 |
| ILMN_2462431 | NM_175450.4    | WDR18         | 0.201937718 |
| ILMN_2604467 | NM_025339.3    | TMEM42        | 0.201786779 |
| ILMN_1229706 | NM_153515.3    | AMMECR1L      | 0.201745554 |
| ILMN_2946901 | NM_144793.1    | SLC25A38      | 0.201661655 |
| ILMN_2627895 | NM_026695.2    | ETFB          | 0.201658906 |
| ILMN_2591440 | NM_009834.1    | CCRN4L        | 0.201463477 |
| ILMN_1225360 | NM_145393.3    | YTHDF2        | 0.201366541 |
| ILMN_1255447 | NM_001081236.1 | 2410131K14RIK | 0.201136573 |
| ILMN_2767949 | NM_153414.3    | INTS9         | 0.201101096 |
| ILMN_2777609 | NM_009326.2    | TCEA2         | 0.201085715 |
| ILMN_2728189 | NM_173747.3    | GPKOW         | 0.201031505 |
| ILMN_2963974 | NM_177367.2    | GEMIN4        | 0.200930031 |
| ILMN_1230489 | NM_133349.2    | ZFAND2A       | 0.200912731 |
| ILMN_2509928 | NM_172569.3    | UNK           | 0.200901973 |
| ILMN_2634108 | NM_007457.2    | AP1S1         | 0.200708355 |
| ILMN_2991912 | NM_009001.3    | RAB3A         | 0.200657362 |
| ILMN_1231966 | NM_019734.1    | ASAH1         | 0.200565151 |
| ILMN_2616989 | NM_001081367.1 | KCTD17        | 0.200488063 |
| ILMN_1214917 | NM_028122.3    | SLC14A1       | 0.20045361  |
| ILMN_2945348 | NM_053108.2    | GLRX          | 0.200270752 |
| ILMN_2732642 | NM_133727.1    | KPTN          | 0.200175992 |
| ILMN_2513041 | NM_011680.1    | USF2          | 0.200135035 |
| ILMN_2747345 | NM_026826.1    | MRPS18C       | 0.200113728 |
| ILMN_2456401 |                | 1810015C11RIK | 0.200051187 |
| ILMN_2974460 | NM_153514.3    | RHOBTB2       | 0.199871848 |
| ILMN_2604097 | NM_011431.2    | EFTUD2        | 0.199648073 |
| ILMN_2802263 | NM_009923.1    | CNP           | 0.199619767 |
| ILMN_3100456 | NM_001033908.1 | MED22         | 0.19958908  |
| ILMN_2510196 |                | GTPBP1        | 0.199498666 |
| ILMN_2497999 | NM_178600.2    | VKORC1        | 0.199481595 |
| ILMN_2543929 | XM_488549.3    | 2610036L11RIK | 0.1992746   |
| ILMN_1250409 | NM_013683.1    | TAP1          | 0.199040287 |
| ILMN_1253618 | NM_016892.3    | CCS           | 0.198991325 |
| ILMN_2946862 | NM_009861.1    | CDC42         | 0.19895783  |
| ILMN_2616215 | NM_134093.1    | LETMD1        | 0.198792999 |
| ILMN_1224609 | NM_134138.1    | PSMG2         | 0.198786324 |
| ILMN_1227758 | NM_133715.4    | ARHGAP27      | 0.198786039 |

|              |                |               |             |
|--------------|----------------|---------------|-------------|
| ILMN_2628045 | NM_010925.2    | RRP1          | 0.198583053 |
| ILMN_2663065 | NM_172865.2    | MANEA         | 0.198569953 |
| ILMN_1254167 | NM_028922.2    | PPAPDC2       | 0.19849762  |
| ILMN_2617925 | NM_198942.1    | DHX57         | 0.19847737  |
| ILMN_2791272 | NM_008898.1    | POR           | 0.198430155 |
| ILMN_1252111 | NM_022992.2    | ARL6IP5       | 0.198011132 |
| ILMN_1244324 | NM_008231.3    | HDGF          | 0.197830149 |
| ILMN_2731629 | NM_026892.1    | EIF1B         | 0.197760311 |
| ILMN_3003518 | NM_172662.1    | GTDC1         | 0.197649346 |
| ILMN_1221810 | NM_011818.2    | GMCL1         | 0.197461018 |
| ILMN_1228822 | NM_031998.2    | TSGA14        | 0.197384051 |
| ILMN_1246408 | XM_001478518.1 | LOC100042427  | 0.197261443 |
| ILMN_2737296 | NM_153168.2    | LARS2         | 0.197259273 |
| ILMN_2760043 | NM_018785.2    | PRPF40A       | 0.197222809 |
| ILMN_1225966 | NM_018771.3    | GIPC1         | 0.197211899 |
| ILMN_2777247 |                | POLD4         | 0.197210987 |
| ILMN_1248267 | XM_286230.5    | E030030I06RIK | 0.197199699 |
| ILMN_1221110 | NM_175266.4    | EPM2AIP1      | 0.197199631 |
| ILMN_3122081 | NM_198004.2    | 5133401N09RIK | 0.197191429 |
| ILMN_1214647 | NM_172674.2    | PHF20         | 0.197131704 |
| ILMN_1244993 | NM_009734.1    | AZI1          | 0.197100475 |
| ILMN_2810539 | NM_001081015.1 | EG630499      | 0.196949556 |
| ILMN_2602633 | XM_913807.2    | EG269105      | 0.196913203 |
| ILMN_2631663 | NM_145450.3    | BC022687      | 0.196818548 |
| ILMN_1257566 | NM_029512.2    | TTPAL         | 0.196505153 |
| ILMN_2648746 | NM_009739.3    | BCKDK         | 0.19648448  |
| ILMN_1232976 | NM_026342.2    | FAM114A2      | 0.196347891 |
| ILMN_2853601 | NM_011828.2    | HS2ST1        | 0.196255715 |
| ILMN_2847869 | NM_181278.2    | B230219D22RIK | 0.196112394 |
| ILMN_2776413 | NM_019651.2    | PTPN9         | 0.196057214 |
| ILMN_2657190 | NM_172518.2    | FBXO42        | 0.196042738 |
| ILMN_2749484 |                | RFC2          | 0.195947485 |
| ILMN_2972478 | NM_198862.2    | NLGN2         | 0.195915347 |
| ILMN_2449449 | NM_013844.2    | ZFP68         | 0.195892247 |
| ILMN_2885900 | NM_133923.3    | TTLL3         | 0.195887281 |
| ILMN_3116330 | NM_026307.2    | CUTA          | 0.195797892 |
| ILMN_2663366 |                | POU2F1        | 0.195713559 |
| ILMN_2804103 | NM_172293.2    | BC038822      | 0.195336743 |
| ILMN_1258601 | NM_018871.2    | YWHAG         | 0.195327147 |
| ILMN_2497268 | NM_011715.2    | WDR1          | 0.195231662 |
| ILMN_2536053 | XM_619852.3    | LOC545487     | 0.195189176 |
| ILMN_1242333 | NM_053122.3    | IMMP2L        | 0.195135208 |
| ILMN_2928320 | NM_013477.2    | ATP6V0D1      | 0.195094643 |
| ILMN_2984828 | NM_008529.2    | LY6E          | 0.194802459 |
| ILMN_2650547 | NM_008316.2    | HUS1          | 0.194761153 |
| ILMN_1252302 | NM_009315.3    | TAF6          | 0.194720509 |

|              |                |               |             |
|--------------|----------------|---------------|-------------|
| ILMN_1253221 |                | 0610030G03RIK | 0.194634032 |
| ILMN_1246785 |                | RAI3          | 0.194430831 |
| ILMN_2525829 | NM_145943.1    | BC031781      | 0.194392159 |
| ILMN_2914880 | NM_020050.1    | TMEM9B        | 0.194225509 |
| ILMN_2618423 | NM_173002.2    | ZXDC          | 0.194005065 |
| ILMN_3092673 | NM_212470.2    | 0610007C21RIK | 0.193962441 |
| ILMN_3005266 | NM_053068.2    | CHRAC1        | 0.193907637 |
| ILMN_1224561 | XM_001476892.1 | LOC100041725  | 0.193839433 |
| ILMN_2889313 | NM_029081.1    | 5730419I09RIK | 0.193750833 |
| ILMN_2885196 | NM_001033420.2 | DOCK1         | 0.193548669 |
| ILMN_2949844 | NM_030721.2    | ACOX3         | 0.193482359 |
| ILMN_2795520 | NM_001001892.1 | H2-K1         | 0.193405416 |
| ILMN_3090728 | NM_001039391.1 | PKIG          | 0.193263674 |
| ILMN_2439645 |                | 2810050O03RIK | 0.193111454 |
| ILMN_2613696 | NM_026718.2    | ANKRD13A      | 0.193023198 |
| ILMN_1248602 |                | MYOHD1        | 0.192873597 |
| ILMN_2716511 | NM_133648.1    | SLC12A6       | 0.19284819  |
| ILMN_2975956 | NM_175102.3    | SF3B5         | 0.192790951 |
| ILMN_2438962 |                | 2900054C01RIK | 0.192746315 |
| ILMN_1237140 | NM_133953.2    | SF3B3         | 0.192733598 |
| ILMN_2780915 | NM_145404.1    | PRMT7         | 0.192594874 |
| ILMN_1227212 | NM_028814.2    | 2810403A07RIK | 0.192451656 |
| ILMN_2698046 | NM_213659.2    | STAT3         | 0.192059991 |
| ILMN_2738629 | NM_133240.1    | ACOT8         | 0.19190234  |
| ILMN_1254705 | NM_025313.1    | ATP5D         | 0.191426041 |
| ILMN_3005441 | NM_026438.2    | PPA1          | 0.191409207 |
| ILMN_1258789 | NM_172677.2    | YTHDF3        | 0.191380791 |
| ILMN_2418524 |                | NUMB          | 0.19131355  |
| ILMN_2679532 | NM_025410.2    | LAGE3         | 0.191248945 |
| ILMN_2770876 | XM_001478884.1 | LOC100047800  | 0.191247572 |
| ILMN_1242352 | NM_019800.3    | ACP6          | 0.191202936 |
| ILMN_1252497 |                | 2810430B18RIK | 0.191000024 |
| ILMN_1247318 | XM_983827.1    | CRAMP1L       | 0.190957759 |
| ILMN_1244536 |                | HNRPA1        | 0.190939203 |
| ILMN_2864290 | NM_172513.2    | BC049806      | 0.190912378 |
| ILMN_2860501 | NM_145616.2    | LRRC49        | 0.19085954  |
| ILMN_2759669 | NM_001008422.1 | SCAF1         | 0.190764826 |
| ILMN_2941972 | NM_001029876.1 | URB2          | 0.190756915 |
| ILMN_3141993 | NM_001079513.1 | ZBTB33        | 0.190747386 |
| ILMN_1237311 | NM_027931.2    | TARS2         | 0.190676116 |
| ILMN_1236805 |                | 9630013D22RIK | 0.190655428 |
| ILMN_2689880 | NM_010361.1    | GSTT2         | 0.190419897 |
| ILMN_1215951 | NM_138315.1    | MICAL1        | 0.190346374 |
| ILMN_2478092 |                | RNMT          | 0.190302722 |
| ILMN_1235979 | NM_018868.2    | NOL5          | 0.190293336 |
| ILMN_1253681 | XM_906947.2    | LOC433546     | 0.189978212 |

|              |                |               |             |
|--------------|----------------|---------------|-------------|
| ILMN_1217723 | NM_025303.2    | STAU2         | 0.189745568 |
| ILMN_2624862 | NM_029519.3    | RAP2A         | 0.189665688 |
| ILMN_2513570 |                | AW123240      | 0.189664456 |
| ILMN_2516801 |                | 4930563B10RIK | 0.189577746 |
| ILMN_1237485 | XM_912979.2    | 2310040A07RIK | 0.189462127 |
| ILMN_2705935 | NM_008705.4    | NME2          | 0.189322649 |
| ILMN_1231939 | NM_173763.3    | CCBL2         | 0.189313867 |
| ILMN_2517483 |                | D15BWG0759E   | 0.189197012 |
| ILMN_2982985 | NM_024254.2    | 2410042D21RIK | 0.188735745 |
| ILMN_2483811 |                | 2210408F11RIK | 0.188560172 |
| ILMN_1234412 | XR_030796.1    | LOC674427     | 0.188346595 |
| ILMN_3161813 | NM_028006.2    | TUBE1         | 0.188339918 |
| ILMN_2638977 | NM_001033318.3 | COG7          | 0.188269791 |
| ILMN_1220340 |                | ZFP496        | 0.188103368 |
| ILMN_2611993 | NM_001042655.1 | TBC1D17       | 0.188077691 |
| ILMN_2522765 | NM_027927.3    | INTS12        | 0.18789683  |
| ILMN_2722650 | XM_001472871.1 | LOC100044776  | 0.18786356  |
| ILMN_1248039 |                | MTDNA_COXII   | 0.187759637 |
| ILMN_2714796 | NM_009898.2    | CORO1A        | 0.187735134 |
| ILMN_1227163 | NM_027350.2    | NARS          | 0.187588045 |
| ILMN_2647435 | NM_019713.3    | RASSF1        | 0.187401559 |
| ILMN_1253666 | NM_013700.1    | USP5          | 0.187373933 |
| ILMN_1223907 | XR_005167.1    | 4933427G23RIK | 0.187308955 |
| ILMN_1251236 | NM_172721.2    | FBXW8         | 0.187225728 |
| ILMN_2614486 | NM_009057.2    | RAG1AP1       | 0.187121524 |
| ILMN_2900216 | NM_026684.1    | NDUFB10       | 0.187036188 |
| ILMN_2850450 | NM_009686.1    | APBB2         | 0.186947459 |
| ILMN_1222813 | XM_001473941.1 | LOC100045542  | 0.186850337 |
| ILMN_2543974 | XR_032081.1    | LOC667251     | 0.18684624  |
| ILMN_2795022 | NM_027149.2    | WDR20A        | 0.186830535 |
| ILMN_2668706 | NM_027216.4    | SLC39A11      | 0.186797249 |
| ILMN_2668020 | NM_021889.4    | SYT9          | 0.186719572 |
| ILMN_2630459 | NM_009911.2    | CXCR4         | 0.186574703 |
| ILMN_2999447 | NM_021437.1    | 1700123O20RIK | 0.186482542 |
| ILMN_2507810 |                | MTDNA_ND5     | 0.186091411 |
| ILMN_1241726 | XM_976343.2    | FRY           | 0.186062003 |
| ILMN_2780167 | NM_145131.1    | PITRM1        | 0.185988839 |
| ILMN_1239234 |                | 2010309L07RIK | 0.185980054 |
| ILMN_1246449 |                | 2210419D22RIK | 0.185685781 |
| ILMN_2605417 | NM_025747.3    | 4933411K20RIK | 0.185651278 |
| ILMN_2529519 | XM_143986.2    | LOC230592     | 0.18560442  |
| ILMN_2985111 | NM_172717.1    | CHFR          | 0.185408969 |
| ILMN_2665161 | NM_177619.2    | MYST2         | 0.185353119 |
| ILMN_2846803 | NM_145358.1    | CAMKK2        | 0.184987424 |
| ILMN_1218934 | NM_025654.2    | RDM1          | 0.184912235 |
| ILMN_2452237 | NM_021884.3    | TSG101        | 0.184890902 |

|              |                |               |             |
|--------------|----------------|---------------|-------------|
| ILMN_3162347 | NM_053015.2    | MLPH          | 0.184778164 |
| ILMN_1224333 | NM_176840.2    | OSBPL11       | 0.184772875 |
| ILMN_2710784 | NM_134118.3    | GPSN2         | 0.184771688 |
| ILMN_2978040 | NM_177369.3    | MYH8          | 0.184699099 |
| ILMN_1240136 | XM_354819.1    | LOC380906     | 0.184683035 |
| ILMN_2624809 | NM_172135.2    | MTERF         | 0.184571552 |
| ILMN_1213862 | NM_027804.2    | USP19         | 0.184453653 |
| ILMN_2763182 | NM_181279.1    | BRE           | 0.184423659 |
| ILMN_2501919 | NM_001042708.1 | ILF3          | 0.184419378 |
| ILMN_2948971 | NM_134060.2    | SLC35B3       | 0.184119424 |
| ILMN_1229971 | NM_016686.3    | VEZF1         | 0.184072125 |
| ILMN_1249142 | XM_001476801.1 | LOC100046781  | 0.183982208 |
| ILMN_2823796 | NM_013827.2    | MTF2          | 0.183915794 |
| ILMN_2765287 | NM_026618.1    | CCDC56        | 0.183879912 |
| ILMN_2871249 | NM_017473.1    | RDH7          | 0.18361137  |
| ILMN_2620517 | NM_011550.2    | MLX           | 0.183600764 |
| ILMN_2601865 | NM_026851.2    | MRPL52        | 0.18353325  |
| ILMN_2599295 | NM_028762.1    | RBM19         | 0.183470527 |
| ILMN_1227824 | NM_028792.2    | JOSD1         | 0.183392372 |
| ILMN_2503715 | XM_127105.8    | TTC7B         | 0.183235675 |
| ILMN_1235982 | NM_018740.1    | RAI12         | 0.183123543 |
| ILMN_2798674 | NM_173382.1    | 2810046L04RIK | 0.182922414 |
| ILMN_2692421 | NM_028412.1    | CIZ1          | 0.182743402 |
| ILMN_2994744 | NM_199476.1    | RRM2B         | 0.182631701 |
| ILMN_2765080 | NM_016736.2    | NUB1          | 0.182628759 |
| ILMN_1215733 | NM_023149.2    | CNDP2         | 0.182582941 |
| ILMN_2602161 | XM_128733.4    | AI255170      | 0.182378114 |
| ILMN_2770926 | NM_007456.3    | AP1M1         | 0.182340344 |
| ILMN_2681670 | NM_177876.4    | VPS37B        | 0.182303169 |
| ILMN_2724386 | XM_001478127.1 | LOC100046898  | 0.182164484 |
| ILMN_2885532 | NM_009949.1    | CPT2          | 0.181820312 |
| ILMN_2846373 | NM_019936.1    | CRIP1         | 0.18175518  |
| ILMN_3114759 | NM_001047436.1 | PARD6A        | 0.181691916 |
| ILMN_2534018 | XM_988312.1    | PDSS2         | 0.181683909 |
| ILMN_2611767 | NM_022420.1    | GPRC5B        | 0.181646763 |
| ILMN_2796651 | NM_011014.1    | OPRS1         | 0.181512423 |
| ILMN_2606700 | NM_001081981.1 | NFIX          | 0.181232023 |
| ILMN_1252597 | XM_911881.2    | 1110033M05RIK | 0.181206716 |
| ILMN_1238533 | NM_178640.2    | B3GALNT2      | 0.181187712 |
| ILMN_2722704 | NM_011590.2    | TIMM17A       | 0.181163393 |
| ILMN_2761472 | NM_013587.2    | LRPAP1        | 0.181084024 |
| ILMN_2424555 | NM_026107.2    | ZKSCAN6       | 0.181071154 |
| ILMN_3006575 | NM_182995.1    | 6330503K22RIK | 0.18105112  |
| ILMN_2996561 | NM_026582.3    | GPR177        | 0.181007536 |
| ILMN_2514924 |                | FCMD          | 0.181005397 |
| ILMN_1229984 | XM_132529.2    | 2700092H06RIK | 0.180997781 |



|              |                |               |             |
|--------------|----------------|---------------|-------------|
| ILMN_2776922 |                | GLRX1         | 0.180413008 |
| ILMN_2551227 |                | E430039I23RIK | 0.180394557 |
| ILMN_2451470 | NM_139061.3    | VPS54         | 0.180368065 |
| ILMN_2635348 | NM_177128.3    | IQCB1         | 0.180280588 |
| ILMN_1234072 | NM_016861.3    | PDLIM1        | 0.180178675 |
| ILMN_2490287 | XM_001002437.1 | HCFC2         | 0.180067206 |
| ILMN_1215810 | NM_026902.3    | MCTS1         | 0.180047431 |
| ILMN_1246148 |                | DGKD          | 0.180029482 |
| ILMN_1257360 | NM_026318.2    | 2310003F16RIK | 0.179859868 |
| ILMN_2732848 | NM_178598.2    | TAGLN2        | 0.179494748 |
| ILMN_2852067 | NM_026070.1    | CCDC53        | 0.179471252 |
| ILMN_2802601 | NM_026591.1    | MRPL24        | 0.179429017 |
| ILMN_1219213 |                | 1810058M03RIK | 0.179307622 |
| ILMN_2455178 | NM_145576.1    | ZFP212        | 0.179271202 |
| ILMN_2750314 | NM_207525.1    | D630048P19RIK | 0.17922072  |
| ILMN_2756460 | NM_020009.1    | FRAP1         | 0.179035654 |
| ILMN_1220353 | NM_010411.2    | HDAC3         | 0.178970948 |
| ILMN_2656362 | XR_034733.1    | LOC677528     | 0.178940133 |
| ILMN_1258594 | NM_001004190.3 | ZFP560        | 0.178692753 |
| ILMN_2944413 | NM_018747.3    | AKAP7         | 0.178595938 |
| ILMN_1239113 | NM_025578.2    | MRPS25        | 0.178453859 |
| ILMN_1213307 | NM_153088.1    | CTDSP1        | 0.178085906 |
| ILMN_1248658 |                | 1110001P04RIK | 0.177975756 |
| ILMN_2881477 | NM_009498.3    | VAMP3         | 0.177712667 |
| ILMN_2773464 | NM_007905.1    | PHC1          | 0.177674514 |
| ILMN_1244059 | NM_013881.3    | ULK2          | 0.177610901 |
| ILMN_2919850 | NM_008511.2    | LRMP          | 0.177476837 |
| ILMN_2899133 | NM_001080769.1 | UHRF1BP1      | 0.17742742  |
| ILMN_2959974 | NM_026891.2    | CDAN1         | 0.177374068 |
| ILMN_1241970 | NM_011752.2    | ZFP259        | 0.177324764 |
| ILMN_2486600 | NM_001048250.2 | 2810008M24RIK | 0.177159245 |
| ILMN_2686994 | NM_144787.1    | JMJD2C        | 0.177143807 |
| ILMN_2916571 | NM_008369.1    | IL3RA         | 0.176996363 |
| ILMN_1221732 | NM_010312.4    | GNB2          | 0.176863826 |
| ILMN_1222829 | NM_026748.1    | INTS1         | 0.176841889 |
| ILMN_1255614 | NM_198664.3    | TBC1D2        | 0.176641726 |
| ILMN_1232120 | NM_024210.2    | 2310033P09RIK | 0.176586218 |
| ILMN_2483638 | NM_198416.2    | ZZZ3          | 0.176543321 |
| ILMN_1244799 | NM_138592.3    | USP39         | 0.176503419 |
| ILMN_3007898 | NM_172262.1    | AOF1          | 0.176459066 |
| ILMN_1240075 | XR_034550.1    | LOC100048384  | 0.176454071 |
| ILMN_2663186 | NM_009837.1    | CCT4          | 0.176136163 |
| ILMN_2618793 | NM_012002.3    | COPS6         | 0.176094646 |
| ILMN_2637698 | NM_027861.2    | 0610010K06RIK | 0.176069866 |
| ILMN_1247490 | NM_021493.2    | 4933428G20RIK | 0.175988949 |
| ILMN_2618634 | XM_207079.2    | SPNA2         | 0.175846671 |

|              |                |               |             |
|--------------|----------------|---------------|-------------|
| ILMN_2444201 |                | 4930579E17RIK | 0.175819167 |
| ILMN_2946873 | NM_172625.1    | D030070L09RIK | 0.175624247 |
| ILMN_3042059 | NM_001025360.1 | KNS2          | 0.175612756 |
| ILMN_1217102 | NM_145853.2    | TPCN1         | 0.175498524 |
| ILMN_1235176 | NM_011634.3    | TRAIP         | 0.175484107 |
| ILMN_1249755 | NM_207302.1    | ZRANB1        | 0.175324787 |
| ILMN_2883392 | NM_016740.3    | S100A11       | 0.175239546 |
| ILMN_3066222 | NM_026799.2    | RNASEN        | 0.175208101 |
| ILMN_1225291 | XR_002223.1    | LOC668631     | 0.175154668 |
| ILMN_3154351 | NM_029869.1    | ZKSCAN1       | 0.175124731 |
| ILMN_2820948 | NM_010022.1    | DBT           | 0.174900967 |
| ILMN_1227006 | NM_027013.1    | SCNM1         | 0.174894159 |
| ILMN_2698353 | NM_029456.1    | SAPS3         | 0.174583375 |
| ILMN_3146204 | NM_178239.2    | NDOR1         | 0.174507031 |
| ILMN_2943319 | NM_024205.1    | 1200003C05RIK | 0.174296957 |
| ILMN_1256128 | XM_001476518.1 | LOC100046469  | 0.174248412 |
| ILMN_2737979 | NM_001081041.1 | 1110014N23RIK | 0.173986705 |
| ILMN_2873174 | NM_021393.1    | A730008L03RIK | 0.173940202 |
| ILMN_2443794 |                | 6230416J20RIK | 0.173908736 |
| ILMN_2783557 | NM_145582.1    | ATPBD3        | 0.173895341 |
| ILMN_3132204 | NM_001039055.1 | POFUT1        | 0.173890534 |
| ILMN_2619286 | NM_019400.1    | RABEP1        | 0.173685881 |
| ILMN_1216669 | NM_030075.1    | KLHDC8B       | 0.173398543 |
| ILMN_2642462 | XM_289699.2    | GTF2I         | 0.173241433 |
| ILMN_2909346 | NM_178907.1    | MAPKAPK3      | 0.173155769 |
| ILMN_1235786 | NM_080633.2    | ACO2          | 0.173065908 |
| ILMN_2662814 | XM_001476501.1 | LOC100045983  | 0.172911055 |
| ILMN_2762255 | NM_198613.1    | AP2S1         | 0.1728729   |
| ILMN_1214578 | NM_173863.2    | CRTC3         | 0.172482599 |
| ILMN_1255193 |                | A630034I12RIK | 0.172348014 |
| ILMN_1249334 | NM_026552.2    | ARPC4         | 0.172247676 |
| ILMN_2666438 | XM_001480232.1 | LOC100048301  | 0.172209335 |
| ILMN_2955883 | NM_019780.1    | VPS29         | 0.172023502 |
| ILMN_2674324 | NM_022653.3    | THOP1         | 0.171832662 |
| ILMN_1256150 |                | C730023J07RIK | 0.171814234 |
| ILMN_1260412 | NM_001081145.1 | TIGD2         | 0.171789491 |
| ILMN_2683128 | NM_009908.1    | CMAS          | 0.171543788 |
| ILMN_2908780 | NM_029354.1    | 2410018G20RIK | 0.171444737 |
| ILMN_2777706 |                | MRPS12        | 0.171310689 |
| ILMN_2954858 | NM_010629.1    | KIFAP3        | 0.171192335 |
| ILMN_1251370 | NM_019443.2    | NDUFA1        | 0.1711357   |
| ILMN_1240994 | NM_011843.2    | MBC2          | 0.170699417 |
| ILMN_2764127 | XM_001478658.1 | LOC100047675  | 0.170698503 |
| ILMN_2443644 | NM_025985.4    | UBE2G1        | 0.170697399 |
| ILMN_2752206 | XM_001480708.1 | LOC100048504  | 0.170405242 |
| ILMN_1238376 | NM_010749.6    | M6PR          | 0.170380456 |

|              |                |               |             |
|--------------|----------------|---------------|-------------|
| ILMN_2685849 | NM_028274.2    | EXOSC6        | 0.16975436  |
| ILMN_2874491 | NM_139064.1    | TNIP2         | 0.169684604 |
| ILMN_2511953 | NM_134131.1    | TNFAIP8       | 0.169612738 |
| ILMN_2723024 | NM_030565.5    | BC004044      | 0.169148367 |
| ILMN_2762397 | NM_025785.2    | FBXO25        | 0.169030978 |
| ILMN_2744459 |                | ALG3          | 0.168989964 |
| ILMN_2449725 | NM_026431.2    | 1810043G02RIK | 0.168985983 |
| ILMN_1228808 | NM_145149.3    | RASGRP4       | 0.168768414 |
| ILMN_2958484 | NM_178420.2    | NLRX1         | 0.16863868  |
| ILMN_2701855 | NM_029629.1    | FAHD2A        | 0.168509823 |
| ILMN_2707771 | NM_016679.3    | KEAP1         | 0.168365784 |
| ILMN_1231058 |                | 8030481K01RIK | 0.168350837 |
| ILMN_1248860 | XM_130951.1    | DPM3          | 0.168117281 |
| ILMN_1248907 | NM_009005.1    | RAB7          | 0.168067087 |
| ILMN_3118707 | NM_009192.2    | SLA           | 0.167998734 |
| ILMN_1244226 | NM_016784.3    | PLRG1         | 0.167916812 |
| ILMN_2769672 | NM_177899.3    | D330038O06RIK | 0.167822614 |
| ILMN_2512849 | NM_025641.3    | UQCRH         | 0.167781249 |
| ILMN_2500434 | XM_001478355.1 | 1500011B03RIK | 0.167671914 |
| ILMN_2636666 | NM_011172.1    | PRODH         | 0.167396071 |
| ILMN_2755483 | NM_134112.4    | KCTD1         | 0.167090363 |
| ILMN_3000456 | NM_211355.1    | SMEK1         | 0.167056541 |
| ILMN_1377918 | XM_001479832.1 | LOC100048105  | 0.166979709 |
| ILMN_1244819 |                | SPG20         | 0.166843202 |
| ILMN_1213345 | XM_154842.2    | LOC239151     | 0.166606854 |
| ILMN_2765513 | NM_008443.3    | KIF3A         | 0.166371803 |
| ILMN_2620304 | NM_019722.3    | ARL2          | 0.166320519 |
| ILMN_1230799 | NM_054102.2    | IVNS1ABP      | 0.166248552 |
| ILMN_2720047 | XM_139515.3    | AW124722      | 0.165999344 |
| ILMN_2727309 | XM_001471696.1 | LOC100044204  | 0.165039713 |
| ILMN_2724294 | NM_024198.3    | GPX7          | 0.164984677 |
| ILMN_2957904 | NM_138668.1    | UFSP2         | 0.164893483 |
| ILMN_1213838 | NM_175164.4    | ARHGAP26      | 0.164859045 |
| ILMN_1228349 | NM_011365.2    | ITSN2         | 0.164802279 |
| ILMN_2678218 | NM_008610.2    | MMP2          | 0.164726351 |
| ILMN_2716464 | NM_027352.3    | GORASP2       | 0.164634818 |
| ILMN_2998303 | NM_011835.1    | KATNA1        | 0.164515372 |
| ILMN_1256971 | NM_008683.3    | NEDD8         | 0.164453809 |
| ILMN_2717470 | NM_028717.3    | ALS2          | 0.164428894 |
| ILMN_1218248 |                | FBP3          | 0.16441536  |
| ILMN_2941728 | NM_025424.1    | NENF          | 0.164395896 |
| ILMN_2758502 | NM_011796.1    | CAPN10        | 0.164312287 |
| ILMN_2855066 | NM_011290.3    | RPL6          | 0.164299961 |
| ILMN_2895908 | NM_178935.2    | 4932441K18RIK | 0.163966736 |
| ILMN_2774528 |                | RWDD2         | 0.163833551 |
| ILMN_1257579 | NM_018815.1    | NUP210        | 0.163706041 |

|              |                |               |             |
|--------------|----------------|---------------|-------------|
| ILMN_2995290 | NM_010064.1    | DYNC112       | 0.163460476 |
| ILMN_2672767 | NM_021895.2    | ACTN4         | 0.163441431 |
| ILMN_2785104 | NM_146083.1    | SFRS7         | 0.163400502 |
| ILMN_2742599 | NM_010906.2    | NFIX          | 0.163356383 |
| ILMN_2794844 | NM_145601.1    | BC016201      | 0.163167168 |
| ILMN_1257666 | NM_145928.1    | TSPAN14       | 0.16313529  |
| ILMN_1214091 |                | 9830118G07RIK | 0.162853754 |
| ILMN_2687612 | NM_001042699.1 | 4831426I19RIK | 0.162796865 |
| ILMN_1225056 | NM_177870.4    | SLC5A6        | 0.16272425  |
| ILMN_2680852 | NM_176923.3    | WDR59         | 0.162600254 |
| ILMN_1215275 | NM_001024458.2 | ADD1          | 0.162495988 |
| ILMN_3104025 | NM_178283.3    | ASB13         | 0.162293535 |
| ILMN_2594714 | NM_011809.2    | ETS2          | 0.162246345 |
| ILMN_1250774 | NM_010786.3    | MDM2          | 0.162203206 |
| ILMN_2606947 | NM_019712.3    | RBX1          | 0.161929108 |
| ILMN_1248079 | NM_172700.2    | ZMPSTE24      | 0.161864543 |
| ILMN_1227459 | NM_028758.2    | GGA2          | 0.161395454 |
| ILMN_2935999 | NM_022022.1    | UBE4B         | 0.161164398 |
| ILMN_1220440 | NM_027351.2    | PPIL3         | 0.161050386 |
| ILMN_2934532 | NM_134129.2    | PRPF19        | 0.160269962 |
| ILMN_2652384 | NM_008784.2    | IGBP1         | 0.160231198 |
| ILMN_1217943 | NM_026908.3    | CAB39L        | 0.160127383 |
| ILMN_1252310 | NM_001003963.2 | DNMT3B        | 0.160046064 |
| ILMN_2776721 |                | GYK           | 0.159706719 |
| ILMN_2671517 | NM_009091.1    | RPS15         | 0.159667294 |
| ILMN_2563186 |                | RIL-PENDING   | 0.159587371 |
| ILMN_2531550 | XM_148897.3    | LOC225897     | 0.159239112 |
| ILMN_2892292 | NM_133981.1    | ALG9          | 0.1591023   |
| ILMN_2916489 | NM_017463.1    | PBX2          | 0.159073347 |
| ILMN_1219088 | NM_025514.2    | D10ERTD641E   | 0.159037528 |
| ILMN_2719687 | NM_024442.1    | CYP4F16       | 0.158839201 |
| ILMN_2455699 | NM_018793.2    | TYK2          | 0.158810307 |
| ILMN_1252490 | NM_026476.1    | 2610101N10RIK | 0.15864119  |
| ILMN_3139103 | NM_009614.2    | ADAM15        | 0.158119113 |
| ILMN_3123120 | NM_001080127.1 | RNPS1         | 0.157964686 |
| ILMN_2799361 | NM_021327.1    | TNIP1         | 0.157872018 |
| ILMN_2729861 |                | BZW1          | 0.156976311 |
| ILMN_2765015 | NM_021876.2    | EED           | 0.156871249 |
| ILMN_1224859 | NM_153175.3    | GIMAP6        | 0.156542558 |
| ILMN_2924088 | NM_026531.2    | ISG20L1       | 0.156275893 |
| ILMN_1242037 |                | 4833406C17RIK | 0.156110028 |
| ILMN_2941033 | NM_172555.1    | PAPOLG        | 0.155887875 |
| ILMN_2695718 | NM_173048.2    | GGA3          | 0.155867753 |
| ILMN_2479359 | NM_016963.2    | TMOD3         | 0.155385723 |
| ILMN_2702002 | XM_284344.2    | FBS1          | 0.155242826 |
| ILMN_2959956 | NM_029956.2    | MMAB          | 0.154797946 |

|              |                |               |             |
|--------------|----------------|---------------|-------------|
| ILMN_3002181 | NM_134084.1    | PPIF          | 0.154709287 |
| ILMN_2873131 | NM_001025246.1 | TRP53I11      | 0.154434088 |
| ILMN_2693976 | NM_010880.3    | NCL           | 0.154358432 |
| ILMN_2848548 | NM_011220.2    | PTS           | 0.154147901 |
| ILMN_2523777 | NM_013916.1    | AL022832      | 0.154063488 |
| ILMN_3146224 | NM_198653.1    | IARS2         | 0.153510623 |
| ILMN_2990220 | NM_001004143.2 | USP22         | 0.153149736 |
| ILMN_1377924 | NM_008084.2    | GAPDH         | 0.1531314   |
| ILMN_2857086 | NM_198102.2    | TRA2A         | 0.152948529 |
| ILMN_2628892 | NM_021514.3    | PFKM          | 0.152341911 |
| ILMN_2775512 |                | EI24          | 0.152304791 |
| ILMN_2865558 | NM_029929.2    | VPS33A        | 0.152031761 |
| ILMN_1223285 | NM_001002012.1 | HSPA2         | 0.151923115 |
| ILMN_2419841 |                | SILG111       | 0.151718307 |
| ILMN_1247078 | NM_139144.2    | OGT           | 0.151016614 |
| ILMN_1259355 | NM_134033.1    | CCDC117       | 0.150944714 |
| ILMN_2675232 | NM_008940.2    | KLK8          | 0.150792244 |
| ILMN_1213290 | NM_001077696.1 | HDAC5         | 0.150553758 |
| ILMN_3006219 | NM_011815.1    | FYB           | 0.150341407 |
| ILMN_3006643 | NM_198127.1    | ABI2          | 0.15013221  |
| ILMN_1224516 | NM_032008.3    | SLMAP         | 0.149770892 |
| ILMN_2723931 | NM_033270.1    | E2F6          | 0.149692357 |
| ILMN_2705268 | NM_013795.4    | ATP5L         | 0.149681046 |
| ILMN_2705003 |                | PPP3CB        | 0.149201512 |
| ILMN_2637714 | NM_009025.2    | RASA3         | 0.148770373 |
| ILMN_1221451 | NM_001033326.2 | DHRX          | 0.148355478 |
| ILMN_1253539 | XR_031980.1    | LOC432554     | 0.147916147 |
| ILMN_2515349 | NM_009564.1    | ZFP64         | 0.147279811 |
| ILMN_2659644 | NM_008928.3    | MAP2K3        | 0.146937811 |
| ILMN_1230119 |                | GCAP27        | 0.146688069 |
| ILMN_3120014 | NM_001080974.1 | SRI           | 0.146255167 |
| ILMN_2592515 |                | D1ERTD396E    | 0.145799931 |
| ILMN_2859659 | NM_027151.1    | DCTN2         | 0.145753784 |
| ILMN_2701824 | NM_177700.3    | ATMIN         | 0.145547751 |
| ILMN_1240590 | NM_026267.2    | NECAP1        | 0.145335133 |
| ILMN_2766755 |                | 1700012H17RIK | 0.14530338  |
| ILMN_1251143 | NM_175169.2    | 9130415E20RIK | 0.145236226 |
| ILMN_2834370 | NM_025530.1    | CUTC          | 0.144591179 |
| ILMN_1228242 | XM_001003466.1 | ZFP383        | 0.144080245 |
| ILMN_1218571 | NM_007839.2    | DHX15         | 0.143807556 |
| ILMN_2739698 | NM_027295.2    | RAB28         | 0.143804919 |
| ILMN_1242264 | NM_009297.1    | SUPT6H        | 0.143667235 |
| ILMN_1220078 |                | A230061B10RIK | 0.143635872 |
| ILMN_1220309 | NM_001081122.1 | CEP63         | 0.143563754 |
| ILMN_2991263 | NM_178750.4    | SS18L1        | 0.143030149 |
| ILMN_1246999 | XR_034818.1    | LOC677205     | 0.1427722   |

|              |                |               |              |
|--------------|----------------|---------------|--------------|
| ILMN_1215004 | NM_173350.1    | OSBPL9        | 0.142482807  |
| ILMN_1232903 | NM_028250.2    | ACBD6         | 0.142455232  |
| ILMN_2860480 | NM_023142.1    | ARPC1B        | 0.140689395  |
| ILMN_2600274 | NM_009941.1    | COX4I1        | 0.139194302  |
| ILMN_2747552 | NM_030236.1    | FBXO34        | 0.138300162  |
| ILMN_2705128 | NM_139063.1    | MUTED         | 0.135217005  |
| ILMN_1239370 | NM_009169.2    | SHFM1         | 0.132207359  |
| ILMN_2866856 | NM_010386.2    | H2-DMA        | -0.137102118 |
| ILMN_2602588 | NM_172735.2    | ZC3HC1        | -0.140180546 |
| ILMN_2606243 | NM_016891.3    | PPP2R1A       | -0.141119499 |
| ILMN_2877069 | NM_009775.2    | TSPO          | -0.141897211 |
| ILMN_2781602 | NM_025409.1    | IER3IP1       | -0.143562227 |
| ILMN_2638875 | NM_007748.3    | COX6A1        | -0.14398175  |
| ILMN_2558125 | XM_912399.2    | NAT11         | -0.144050161 |
| ILMN_2912239 | NM_008292.2    | HSD17B4       | -0.144348032 |
| ILMN_1216709 |                | PBX4          | -0.144359271 |
| ILMN_2670517 | NM_145927.2    | FNTB          | -0.144720738 |
| ILMN_2744217 | NM_017407.1    | SPAG5         | -0.144895045 |
| ILMN_3160792 | XR_030655.1    | LOC666676     | -0.145058634 |
| ILMN_2705848 | NM_011933.1    | DECR2         | -0.145388797 |
| ILMN_1256234 | NM_008254.1    | HMGCL         | -0.14569129  |
| ILMN_2681030 | XM_894495.2    | EG629595      | -0.146367959 |
| ILMN_1225191 | NM_172607.3    | NAPRT1        | -0.146603753 |
| ILMN_2435140 | NM_025899.2    | UQCRC2        | -0.147184982 |
| ILMN_2987844 | NM_133656.2    | CRK           | -0.147651515 |
| ILMN_2718861 | NM_001083882.1 | 1600012H06RIK | -0.148014687 |
| ILMN_1235741 | NM_007418.2    | ADRA2C        | -0.149768367 |
| ILMN_1247129 |                | ZFP26         | -0.149845482 |
| ILMN_1260261 | NM_021438.2    | FIBP          | -0.150463222 |
| ILMN_2949275 | NM_177684.2    | ZFP637        | -0.150546645 |
| ILMN_1258671 |                | FBXW2         | -0.151059139 |
| ILMN_1212637 | NM_027400.2    | LMAN1         | -0.151750347 |
| ILMN_2551055 |                | C030014F05RIK | -0.151800314 |
| ILMN_2617112 | NM_008233.2    | HDGFRP2       | -0.152032064 |
| ILMN_2643150 | NM_133941.2    | DHX32         | -0.152176944 |
| ILMN_1237034 | NM_133886.2    | AU040320      | -0.152629028 |
| ILMN_1217709 | XM_357733.1    | LOC384593     | -0.153111605 |
| ILMN_3009910 | NM_026453.1    | RBM13         | -0.153380245 |
| ILMN_1259473 | NM_007999.3    | FEN1          | -0.153545238 |
| ILMN_1255473 | NM_025334.3    | TXNDC12       | -0.153742271 |
| ILMN_2842999 | NM_138583.1    | D16H22S680E   | -0.154725591 |
| ILMN_2579025 |                | A430079D01RIK | -0.154820226 |
| ILMN_2541142 | XM_356076.1    | LOC382010     | -0.155435264 |
| ILMN_2523794 | NM_177055.2    | A630001G21RIK | -0.155500154 |
| ILMN_1259482 | NM_008774.2    | PABPC1        | -0.155522353 |
| ILMN_3007862 | NM_029631.2    | ABHD14B       | -0.155823002 |

|              |                |               |              |
|--------------|----------------|---------------|--------------|
| ILMN_1225124 |                | UBR1          | -0.156032884 |
| ILMN_2679037 | XM_001476984.1 | LOC100046883  | -0.156347778 |
| ILMN_1223041 |                | ABI3          | -0.156348926 |
| ILMN_2654442 | NM_145958.1    | KBTBD2        | -0.156466378 |
| ILMN_2862214 | NM_025392.1    | BCCIP         | -0.156632364 |
| ILMN_2807665 | NM_029645.2    | 2010003O18RIK | -0.157088367 |
| ILMN_1251184 | NM_010938.3    | NRF1          | -0.157167972 |
| ILMN_1245731 | NM_008245.3    | HHEX          | -0.157176577 |
| ILMN_1245471 | NM_145964.2    | BC002199      | -0.157188795 |
| ILMN_1216388 | NM_025692.2    | UBA5          | -0.157264606 |
| ILMN_1216823 | NM_001081359.1 | UBR5          | -0.157310172 |
| ILMN_2455637 | NM_028404.2    | TOP1MT        | -0.157447276 |
| ILMN_1216116 | NM_031878.1    | SMARCD2       | -0.157464427 |
| ILMN_2470333 | NM_144937.3    | USP3          | -0.157781628 |
| ILMN_2978163 | NM_010911.1    | NFS1          | -0.158026003 |
| ILMN_1215910 | NM_180974.3    | FOXN2         | -0.158341426 |
| ILMN_2752948 | NM_025588.2    | EXOC2         | -0.158406897 |
| ILMN_2850839 | NM_011509.1    | 100041294     | -0.158425014 |
| ILMN_2806188 | NM_028031.1    | ZDHHC13       | -0.158511153 |
| ILMN_1254523 | NM_010362.2    | GSTO1         | -0.158762111 |
| ILMN_2746421 | NM_028722.1    | 4121402D02RIK | -0.158832163 |
| ILMN_2617228 | NM_011497.3    | AURKA         | -0.159045922 |
| ILMN_2445021 | NM_012039.1    | ZW10          | -0.159055311 |
| ILMN_2688345 | XM_126043.3    | H2AFV         | -0.159354305 |
| ILMN_2688834 | NM_028221.3    | 2310065K24RIK | -0.159490847 |
| ILMN_2894984 | NM_025598.1    | 2700038C09RIK | -0.159502847 |
| ILMN_2436634 |                | MTDNA_ATP8    | -0.16046567  |
| ILMN_2837855 | NM_022309.2    | CBFB          | -0.160636339 |
| ILMN_3013144 | NM_001080949.1 | TTC5          | -0.161392032 |
| ILMN_2834777 | NM_008390.1    | IRF1          | -0.161469873 |
| ILMN_2491301 | NM_024258.1    | USP16         | -0.161800772 |
| ILMN_1214934 | NM_030248.1    | CDK5RAP3      | -0.161838585 |
| ILMN_2701562 |                | 2610103J23RIK | -0.161875074 |
| ILMN_1214521 | XR_032986.1    | LOC623453     | -0.161895145 |
| ILMN_1216437 |                | RTN3          | -0.161937211 |
| ILMN_2744280 | NM_019870.1    | ARD1          | -0.162014665 |
| ILMN_2624977 |                | A730024F05RIK | -0.162051229 |
| ILMN_2965526 | NM_026157.2    | PAPD1         | -0.162250338 |
| ILMN_2758452 | NM_008258.1    | HN1           | -0.162266188 |
| ILMN_2658407 | NM_198093.2    | ELMO1         | -0.162410731 |
| ILMN_2494244 | NM_011695.2    | VDAC2         | -0.162529598 |
| ILMN_2650106 | NM_198006.3    | 6330578E17RIK | -0.16261696  |
| ILMN_2955806 | NM_029802.2    | ARFIP2        | -0.162738866 |
| ILMN_2657546 | NM_011991.1    | COPS3         | -0.163227962 |
| ILMN_2914010 | NM_010058.1    | DMWD          | -0.163333657 |
| ILMN_2862619 | NM_010247.1    | XRCC6         | -0.163343458 |

|              |                |               |              |
|--------------|----------------|---------------|--------------|
| ILMN_2737158 | NM_027922.1    | ANKLE2        | -0.163357815 |
| ILMN_2595519 | NM_010715.2    | LIG1          | -0.163390513 |
| ILMN_1226882 | XM_001479252.1 | LOC100047839  | -0.163434519 |
| ILMN_2908070 | NM_013882.1    | GTSE1         | -0.163487965 |
| ILMN_1236107 | XM_973033.1    | OGFRL1        | -0.163667999 |
| ILMN_2528793 | XM_358587.1    | LOC381466     | -0.16371237  |
| ILMN_1226652 | NM_177588.2    | THNSL1        | -0.163749148 |
| ILMN_3016674 | NM_001013392.3 | RREB1         | -0.163885944 |
| ILMN_1258961 |                | HRB           | -0.164235577 |
| ILMN_2527419 | XM_135563.3    | LOC236223     | -0.164345644 |
| ILMN_2857326 | NM_172116.2    | PDDC1         | -0.16452479  |
| ILMN_1241307 | NM_153516.2    | BCL2L13       | -0.164758089 |
| ILMN_2529932 | XR_034995.1    | LOC385905     | -0.164983923 |
| ILMN_1239890 |                | D430043P15RIK | -0.165066237 |
| ILMN_2650439 | NM_013814.2    | GALNT1        | -0.165072116 |
| ILMN_1221142 | NM_011145.3    | PPARD         | -0.165298171 |
| ILMN_2946466 | NM_009668.1    | BIN1          | -0.165658518 |
| ILMN_2724919 | NM_013604.1    | MTX1          | -0.166009114 |
| ILMN_1237615 | XM_149157.1    | 1500002O10RIK | -0.166019172 |
| ILMN_2958099 | NM_007421.1    | ADSSL1        | -0.16607719  |
| ILMN_2754698 | NM_013489.1    | CD84          | -0.166135834 |
| ILMN_2595383 | NM_139229.2    | COG8          | -0.166274704 |
| ILMN_1240839 | NM_026680.4    | GOLT1A        | -0.166388962 |
| ILMN_1252649 | NM_013764.1    | DGUOK         | -0.166654888 |
| ILMN_2482214 |                | D930020L01    | -0.16670195  |
| ILMN_2846731 | NM_025423.1    | 1110059E24RIK | -0.166811103 |
| ILMN_2771396 | NM_016781.2    | PRKAG1        | -0.167133552 |
| ILMN_2757743 | NM_022309.3    | CBFB          | -0.167505313 |
| ILMN_2703886 | NM_026758.3    | MPHOSPH6      | -0.167724874 |
| ILMN_2624448 | NM_146141.1    | PPA2          | -0.167808292 |
| ILMN_1230243 | NM_008136.2    | GNAL1         | -0.167879776 |
| ILMN_1238628 | XM_916662.2    | 2210016F16RIK | -0.168358255 |
| ILMN_1230223 | NM_001033447.2 | GM960         | -0.168594875 |
| ILMN_2750011 | NM_134189.2    | GALNT10       | -0.168711971 |
| ILMN_2807750 | NM_026643.2    | 2410017P07RIK | -0.169229879 |
| ILMN_2665095 | NM_027195.1    | CASZ1         | -0.169325158 |
| ILMN_2596007 | NM_028521.2    | PHOSPHO2      | -0.169716567 |
| ILMN_1244024 | NM_009884.3    | CEBPG         | -0.169920047 |
| ILMN_2930819 | NM_001012638.1 | ACD           | -0.170104295 |
| ILMN_1233153 | NM_011187.1    | PSMB7         | -0.170127325 |
| ILMN_2787085 | NM_029701.1    | SPCS3         | -0.170169515 |
| ILMN_2633039 | NM_001033310.2 | COX18         | -0.170274177 |
| ILMN_2879848 | NM_009176.2    | ST3GAL3       | -0.170342414 |
| ILMN_2722542 | NM_022994.2    | DAP3          | -0.170621121 |
| ILMN_2674548 | NM_178599.4    | COMMD8        | -0.170840963 |
| ILMN_2669404 | NM_010722.5    | LMNB2         | -0.170864912 |



|              |                |               |              |
|--------------|----------------|---------------|--------------|
| ILMN_2772248 |                | CAPNS1        | -0.17090659  |
| ILMN_2660414 | NM_025442.3    | ALG5          | -0.170944782 |
| ILMN_3139479 | NM_001039189.1 | FARS2         | -0.1709725   |
| ILMN_2722623 | NM_145156.1    | SLC25A28      | -0.171319801 |
| ILMN_2651190 | NM_019650.2    | GOSR2         | -0.171453649 |
| ILMN_2594899 | NM_027485.2    | MED26         | -0.171656905 |
| ILMN_2732308 | NM_008910.2    | PPM1A         | -0.172264881 |
| ILMN_2669172 | NM_029249.2    | 4930547N16RIK | -0.172266737 |
| ILMN_3163029 | NM_001001327.1 | VKORC1L1      | -0.172303547 |
| ILMN_2706057 | NM_026009.1    | 2610204L23RIK | -0.172423126 |
| ILMN_1240134 | NM_001040396.2 | 2810407C02RIK | -0.172553701 |
| ILMN_2728385 | NM_025695.4    | SMC6          | -0.173069982 |
| ILMN_2603660 | XM_001471971.1 | LOC100044324  | -0.17307651  |
| ILMN_1256618 | NM_175205.2    | 4632419I22RIK | -0.173184367 |
| ILMN_1249339 | NM_029391.2    | RAB4B         | -0.173420209 |
| ILMN_1214793 | NM_025536.2    | COMMD5        | -0.173429396 |
| ILMN_2589838 | NM_025888.5    | KCTD20        | -0.173473222 |
| ILMN_2698843 | NM_026551.3    | DCAKD         | -0.173585518 |
| ILMN_2998020 | NM_026911.1    | SPCS1         | -0.17361574  |
| ILMN_2879349 | NM_181569.1    | MARE          | -0.17369361  |
| ILMN_2830830 | NM_178625.3    | TMEM209       | -0.173794343 |
| ILMN_2608309 |                | 2900057D21RIK | -0.174146887 |
| ILMN_1247221 | NM_145567.1    | HIBADH        | -0.174241194 |
| ILMN_1229667 | NM_001083809.1 | SLC43A1       | -0.174371924 |
| ILMN_3047301 | NM_019816.1    | AATF          | -0.174409142 |
| ILMN_1227035 |                | B230322F03RIK | -0.174412691 |
| ILMN_2907642 | NM_025936.1    | RARS          | -0.174465838 |
| ILMN_2474886 |                | WHSC2         | -0.174542682 |
| ILMN_2669789 | NM_198631.1    | BC057627      | -0.174807978 |
| ILMN_2534090 | XM_125952.4    | LOC216443     | -0.175027183 |
| ILMN_2601281 | XM_895770.2    | EML2          | -0.175052735 |
| ILMN_2789544 | NM_013853.1    | ABCF2         | -0.175247185 |
| ILMN_1259048 | NM_027315.3    | UBE2Q1        | -0.175400463 |
| ILMN_2604256 | XM_485050.5    | LOC433464     | -0.175439502 |
| ILMN_1252290 | NM_173368.2    | CHD6          | -0.175593597 |
| ILMN_1213872 | NM_178652.2    | SUPT3H        | -0.175642652 |
| ILMN_2772389 | NM_172150.4    | IFT52         | -0.175646729 |
| ILMN_2682223 | NM_145559.1    | SLC2A9        | -0.175925219 |
| ILMN_3041056 | NM_011513.2    | MED22         | -0.175947191 |
| ILMN_2874071 | NM_008249.2    | TFB2M         | -0.17614579  |
| ILMN_1247814 | NM_010247.2    | XRCC6         | -0.17653973  |
| ILMN_2905386 | NM_001081233.1 | EG433923      | -0.176707243 |
| ILMN_1245492 | NM_011306.3    | RXRβ          | -0.176728503 |
| ILMN_1230991 | XM_001478119.1 | LOC100041835  | -0.176750689 |
| ILMN_2706631 | XM_001479683.1 | LOC100048076  | -0.176946326 |
| ILMN_1258046 | XM_001472068.1 | LOC100039001  | -0.177571018 |

|              |                |                |              |
|--------------|----------------|----------------|--------------|
| ILMN_2846317 | NM_177992.2    | GMPR2          | -0.178006595 |
| ILMN_2641705 | NM_007661.3    | CDC2L1         | -0.178301778 |
| ILMN_2713872 | NM_173432.2    | PSKH1          | -0.178454238 |
| ILMN_2450676 |                | 5530400K22RIK  | -0.178672033 |
| ILMN_2642052 | XR_005252.1    | 3010003L21RIK  | -0.178733746 |
| ILMN_2539062 | XM_355737.1    | LOC381747      | -0.17876293  |
| ILMN_1232760 | NM_178785.3    | A430107D22RIK  | -0.178799259 |
| ILMN_2453695 | NM_009478.3    | UROD           | -0.178940137 |
| ILMN_2731424 | NM_177768.2    | BC038156       | -0.178958125 |
| ILMN_2988143 | NM_139198.1    | PLAC8          | -0.17907326  |
| ILMN_2778122 | NM_011050.3    | PDCD4          | -0.179080597 |
| ILMN_1222199 |                | GLS            | -0.179179256 |
| ILMN_2524067 | XM_130015.2    | 4933428L19RIK  | -0.179318139 |
| ILMN_2567803 |                | C530045P18RIK  | -0.179346511 |
| ILMN_3150205 | NR_002891.1    | EG433224       | -0.179362425 |
| ILMN_2644504 |                | RNASE4         | -0.17949333  |
| ILMN_1239720 | NM_023423.3    | AKIRIN1        | -0.179497337 |
| ILMN_2865239 | NM_025878.1    | MRPS18B        | -0.180065797 |
| ILMN_1247261 | NM_008079.3    | GALC           | -0.180179355 |
| ILMN_1249829 | NM_008652.2    | MYBL2          | -0.180199258 |
| ILMN_2835683 | NM_001081032.1 | EG667977       | -0.180339387 |
| ILMN_2545037 |                | 5730525O22RIK  | -0.180440777 |
| ILMN_2995755 | NM_144866.3    | ETF1           | -0.180630051 |
| ILMN_3161639 | NM_023464.2    | SSNA1          | -0.180772105 |
| ILMN_2618745 | NM_181423.2    | SUPV3L1        | -0.18088481  |
| ILMN_1229035 | NM_146170.3    | C87436         | -0.181057645 |
| ILMN_2520032 | NM_025428.1    | ZDHHC12        | -0.181340901 |
| ILMN_1222602 | NM_175403.2    | 2410014A08RIK  | -0.181379776 |
| ILMN_2720930 | NM_030749.1    | SIL1           | -0.181398902 |
| ILMN_1256348 | NM_133763.1    | DNTTIP1        | -0.181428965 |
| ILMN_2429469 |                | 4930463P07RIK  | -0.181561204 |
| ILMN_2792362 | NM_080446.1    | HELB           | -0.181783628 |
| ILMN_1259962 | NM_144825.2    | TAOK1          | -0.182145312 |
| ILMN_2770414 | NM_017475.2    | RRAGC          | -0.182196584 |
| ILMN_2910627 | NM_022816.1    | ACOT10         | -0.182282425 |
| ILMN_1239645 | NM_030109.1    | SF3B2          | -0.182359552 |
| ILMN_1258372 | NM_011069.2    | PEX11B         | -0.182554513 |
| ILMN_1254565 | NM_001024919.1 | 2310022M17RIK  | -0.182589194 |
| ILMN_1214738 | NM_029949.3    | SNAPC3         | -0.182672926 |
| ILMN_3151345 | NM_173363.4    | EIF5           | -0.18272997  |
| ILMN_1240415 | XM_134668.2    | LOC234987      | -0.182808373 |
| ILMN_2720522 | XM_132236.4    | HEL308-PENDING | -0.182833399 |
| ILMN_1247543 | XM_001472863.1 | LOC100044692   | -0.182884314 |
| ILMN_3142384 | NM_026081.5    | GPRASP1        | -0.182979197 |
| ILMN_2976601 | NM_019678.2    | TFG            | -0.183336627 |
| ILMN_1232766 | NM_178653.3    | SCCPDH         | -0.183348208 |

|              |                |               |              |
|--------------|----------------|---------------|--------------|
| ILMN_2697248 | NM_026669.3    | TMBIM6        | -0.183608328 |
| ILMN_1246694 | NM_026824.4    | DUS1L         | -0.184179814 |
| ILMN_2549315 | XM_001480665.1 | 2900097C17RIK | -0.184200187 |
| ILMN_2790144 | NM_025996.1    | TOMM34        | -0.184255238 |
| ILMN_1227712 | NM_134139.1    | WDR74         | -0.184290972 |
| ILMN_3128992 | NM_001033126.2 | CD27          | -0.184533115 |
| ILMN_2762745 | NM_008602.3    | PIAS2         | -0.184695446 |
| ILMN_1257178 | NM_175494.4    | ZFP367        | -0.184819546 |
| ILMN_1248637 | NM_026330.2    | NSMCE1        | -0.184872456 |
| ILMN_2739517 | NM_025297.1    | MECR          | -0.185200828 |
| ILMN_1238032 | NM_178729.3    | FBXL5         | -0.185261858 |
| ILMN_1245579 | NM_008413.2    | JAK2          | -0.185263571 |
| ILMN_2607972 | NM_178400.2    | 9130221H12RIK | -0.185388741 |
| ILMN_1233589 | NM_001033126.2 | CD27          | -0.185900578 |
| ILMN_2595597 | NM_028390.2    | ANLN          | -0.185980037 |
| ILMN_1233759 | NM_023066.2    | ASPH          | -0.18668688  |
| ILMN_1243563 | NM_153583.9    | ATG4D         | -0.186911946 |
| ILMN_1238247 | XM_356511.1    | LOC382449     | -0.187042161 |
| ILMN_2484987 | NM_010764.2    | MAN2B1        | -0.187082163 |
| ILMN_1227357 | NM_008028.2    | FLOT2         | -0.187160285 |
| ILMN_2716195 | NM_178197.1    | HIST1H2BH     | -0.187187038 |
| ILMN_2773422 | NM_001078649.1 | TMEM134       | -0.187208465 |
| ILMN_2867899 | NM_023223.1    | CDC20         | -0.187246206 |
| ILMN_3097107 | NM_027448.1    | LCA5          | -0.187463617 |
| ILMN_2752618 | NM_177766.2    | SLC35E1       | -0.187470291 |
| ILMN_2683933 | NM_130860.2    | CDK9          | -0.187655899 |
| ILMN_2664049 | NM_024177.3    | MRPL38        | -0.187749782 |
| ILMN_2870688 | NM_019805.2    | ANAPC7        | -0.187811537 |
| ILMN_3050926 | NM_147217.1    | GPRC5C        | -0.187929686 |
| ILMN_1217396 | NM_026654.1    | 4930584N22RIK | -0.188062686 |
| ILMN_2618038 | NM_172162.2    | MIZF          | -0.18811261  |
| ILMN_2983093 | NM_013768.1    | PRMT5         | -0.188151887 |
| ILMN_2800881 | NM_175287.2    | A430005L14RIK | -0.188404469 |
| ILMN_2972646 | NM_028303.1    | PDZD11        | -0.18843229  |
| ILMN_1248616 | NM_001100596.1 | LOC100038993  | -0.188438748 |
| ILMN_1216920 | NM_026202.2    | CCDC50        | -0.18846092  |
| ILMN_2648454 | NM_172900.3    | SIGLECG       | -0.188507855 |
| ILMN_2837226 | NM_173748.2    | NUDCD3        | -0.188833134 |
| ILMN_2651526 | NM_177472.4    | BTBD12        | -0.188858985 |
| ILMN_2740902 | XM_001000692.2 | MKI67         | -0.189203648 |
| ILMN_1245528 | NM_025836.3    | M6PRBP1       | -0.189338189 |
| ILMN_1227874 | XM_001480260.1 | LOC100048589  | -0.189369437 |
| ILMN_1229430 | NM_133728.2    | ASNSD1        | -0.189431592 |
| ILMN_1213456 | NM_025522.3    | DHRS7         | -0.189531953 |
| ILMN_1213449 | NM_028636.2    | MAN2C1        | -0.189623934 |
| ILMN_2860196 | NM_011811.2    | FARSB         | -0.18965243  |

|              |                |                |              |
|--------------|----------------|----------------|--------------|
| ILMN_2732961 | NM_029409.2    | MFF            | -0.18984057  |
| ILMN_1239569 | NM_178069.5    | LSG1           | -0.189955512 |
| ILMN_2956153 | NM_023743.1    | EIF4ENIF1      | -0.189971024 |
| ILMN_2932539 | NM_009066.2    | RING1          | -0.190174612 |
| ILMN_2604056 | NM_145414.1    | NSUN5          | -0.190379757 |
| ILMN_1234453 | XM_001480197.1 | LOC100043257   | -0.190647987 |
| ILMN_2599751 | NM_030566.2    | RABEP2         | -0.190778786 |
| ILMN_2754636 | XM_916567.2    | LOC639931      | -0.191100366 |
| ILMN_3107690 | NM_028527.1    | 1700047I17RIK1 | -0.19151545  |
| ILMN_1256186 | NM_021499.2    | WDR8           | -0.191558205 |
| ILMN_2838199 | NM_027030.1    | DCPS           | -0.191638946 |
| ILMN_3158668 | NM_008801.2    | PDE6D          | -0.191740402 |
| ILMN_1218043 |                | 9630009A08RIK  | -0.191756403 |
| ILMN_2680406 | NM_134064.1    | RNF44          | -0.191806812 |
| ILMN_1244431 | NM_001039089.1 | SEL1L          | -0.191911752 |
| ILMN_3143116 | NM_001081000.1 | TRMT2A         | -0.192011195 |
| ILMN_2757445 | NM_029852.2    | CCDC41         | -0.192089262 |
| ILMN_1219565 | NM_027346.1    | CCDC44         | -0.192117241 |
| ILMN_2765032 | NM_008433.3    | KCNN4          | -0.192285719 |
| ILMN_2648867 | NM_010911.1    | NFS1           | -0.192294153 |
| ILMN_1248444 | XM_484171.3    | BC002230       | -0.192492944 |
| ILMN_2956381 | NM_026780.1    | SYF2           | -0.192545426 |
| ILMN_2578961 |                | A130090M16RIK  | -0.192643939 |
| ILMN_2955755 | NM_134136.1    | FBXO38         | -0.192649559 |
| ILMN_1215218 | NM_145410.3    | FAM173A        | -0.192752574 |
| ILMN_1220190 | XM_356798.1    | LOC383010      | -0.192825384 |
| ILMN_2759884 | XM_126172.8    | LARP1          | -0.192978984 |
| ILMN_1260590 | XM_148097.1    | 4833409J19RIK  | -0.193059867 |
| ILMN_2802714 | NM_028273.1    | PGAM5          | -0.193111455 |
| ILMN_1213090 |                | 2010305C02RIK  | -0.193207449 |
| ILMN_2776909 |                | IRX3           | -0.193219208 |
| ILMN_2842859 | NM_145990.3    | CDK5RAP2       | -0.193345955 |
| ILMN_2746811 | NM_030084.3    | GPR108         | -0.193403852 |
| ILMN_2674952 | NM_029965.2    | RNF170         | -0.19345088  |
| ILMN_2456278 |                | AI551093       | -0.193481511 |
| ILMN_1216167 | NM_026780.3    | SYF2           | -0.193888338 |
| ILMN_1239527 | NM_019706.2    | RNF138         | -0.193944666 |
| ILMN_3144458 | NM_001042673.1 | FANCC          | -0.193952269 |
| ILMN_1224434 | NM_026002.4    | MTDH           | -0.193976412 |
| ILMN_2957580 | NM_146365.1    | OLFR1094       | -0.194207999 |
| ILMN_2932964 | NM_016748.1    | CTPS           | -0.194285928 |
| ILMN_3002284 | NM_026570.1    | YEATS4         | -0.194461952 |
| ILMN_2599659 | NM_011711.1    | FMNL3          | -0.19453414  |
| ILMN_2668630 | XM_126944.3    | 2700049A03RIK  | -0.194611353 |
| ILMN_2547052 |                | 2810049C16RIK  | -0.19491753  |
| ILMN_2626383 | NM_008622.3    | MPV17          | -0.19504469  |

|              |                |               |                    |
|--------------|----------------|---------------|--------------------|
| ILMN_2880246 | NM_020618.3    | SMARCE1       | -0.195108515       |
| ILMN_3108440 | NM_144509.1    | ARL6IP4       | -0.195168466       |
| ILMN_2766403 | NM_009358.2    | PPP2R5D       | -0.195341443       |
| ILMN_2655577 | NM_011131.2    | POLD1         | -0.195449564       |
| ILMN_2554688 | NM_175212.4    | TMEM65        | -0.195960205       |
| ILMN_1239863 | NM_173386.3    | E330016A19RIK | -0.195998535       |
| ILMN_2977350 | NM_146061.4    | PRR5          | -0.1961361         |
| ILMN_1239277 | NM_010435.1    | HIRA          | -0.196137383       |
| ILMN_1225520 | NM_023197.1    | 2310008H09RIK | -0.196332082       |
| ILMN_2606579 | NM_134118.3    | GPSN2         | -0.196476372       |
| ILMN_2778409 | NM_028860.1    | MTMR3         | -0.196498994       |
| ILMN_2760211 | NM_178667.3    | TFDP2         | -0.196508967       |
| ILMN_2588411 | NM_023168.3    | GRINA         | -0.196618091       |
| ILMN_1236009 | NM_007595.3    | CAMK2B        | -0.196714037       |
| ILMN_1246518 | XM_001478116.1 | 4933400N17RIK | -0.196787192       |
| ILMN_2964816 | NM_146068.2    | 2310008H04RIK | -0.196957644       |
| ILMN_1238871 | NM_025709.2    | GAPVD1        | -0.196969273       |
| ILMN_2879746 | NM_010688.2    | LASP1         | -0.197148861       |
| ILMN_1231896 | XM_356132.1    | SSBP4         | -0.197374251       |
| ILMN_2780759 | NM_016670.2    | PKNOX1        | -0.197760665       |
| ILMN_2657946 | NM_024197.1    | NDUFA10       | -0.197844143       |
| ILMN_2850527 | NM_153552.2    | THOC1         | -0.197913432       |
| ILMN_2531520 | NM_001033448.2 | GM962         | -0.198004955       |
| ILMN_1221262 | NM_025463.2    | 1810009A15RIK | -0.198031908       |
| ILMN_2623056 | NM_175554.3    | CLSPN         | -0.198067237       |
| ILMN_2743551 | NM_134155.1    | BRMS1         | -0.198103052       |
| ILMN_2618329 | NM_145486.4    |               | March2 -0.19816308 |
| ILMN_1249984 | XM_123660.2    | LOC227092     | -0.198195272       |
| ILMN_2636536 | NM_023196.2    | PLA2G12A      | -0.198258927       |
| ILMN_1222132 | NM_198292.3    | TEX2          | -0.198355192       |
| ILMN_1236960 | NM_001081652.1 | AB182283      | -0.198727988       |
| ILMN_1233999 |                | PPP3CC        | -0.198824039       |
| ILMN_2703698 | NM_028307.1    | TDRKH         | -0.199170305       |
| ILMN_1260447 | XM_001479822.1 | LOC100043192  | -0.199253521       |
| ILMN_3006911 | NM_130882.1    | CYP4F13       | -0.199525844       |
| ILMN_1239333 |                | IQGAP1        | -0.199608905       |
| ILMN_2971721 | NM_028596.2    | 2410025L10RIK | -0.199675477       |
| ILMN_2700524 | NM_023564.3    | PLSCR3        | -0.199755118       |
| ILMN_2721337 | NM_008062.2    | G6PDX         | -0.199777546       |
| ILMN_2885982 | NM_153597.1    | TRPT1         | -0.199877792       |
| ILMN_2878486 | NM_025431.2    | LLPH          | -0.199892437       |
| ILMN_1240356 | XM_910030.2    | LOC635086     | -0.200089575       |
| ILMN_3082580 | NM_001048146.1 | AZI2          | -0.200090459       |
| ILMN_2647669 | NM_025370.2    | 1110018J18RIK | -0.200353988       |
| ILMN_1232280 | NM_178762.3    | A930025D01RIK | -0.200375071       |
| ILMN_2746425 | NM_021435.3    | SLC35B4       | -0.200376451       |

|              |                |               |              |
|--------------|----------------|---------------|--------------|
| ILMN_1230039 | NM_010489.2    | HYAL2         | -0.200680541 |
| ILMN_2965417 | NR_002702.1    | NPM3-PS1      | -0.200700194 |
| ILMN_2588254 | NM_138669.1    | EIF4A3        | -0.200769111 |
| ILMN_2661005 | NM_178065.3    | 1110018G07RIK | -0.20094622  |
| ILMN_1250969 | XM_001477228.1 | LOC100047016  | -0.201025516 |
| ILMN_1227756 |                | GPLD1         | -0.20108433  |
| ILMN_2773037 |                | H2-OA         | -0.201159219 |
| ILMN_2588572 | NM_026697.3    | RAB14         | -0.201267639 |
| ILMN_1255287 |                | MELA          | -0.20129263  |
| ILMN_2501601 | NM_020285.1    | TSSC4         | -0.201367324 |
| ILMN_2872419 | NM_025970.1    | ZBTB8OS       | -0.201368293 |
| ILMN_2595091 | NM_175340.3    | NHLRC1        | -0.201457141 |
| ILMN_1213149 |                | 1110029L17RIK | -0.201541358 |
| ILMN_2780205 | NM_009818.1    | CTNNA1        | -0.201581139 |
| ILMN_2720770 | NM_027030.2    | DCPS          | -0.201607117 |
| ILMN_2516899 | NM_178635.2    | UVRAG         | -0.201708078 |
| ILMN_2677391 | XM_919383.2    | LOC631302     | -0.201831221 |
| ILMN_1248535 | NM_028500.2    | CALR3         | -0.201921597 |
| ILMN_2739675 | NM_173383.1    | DND1          | -0.202017859 |
| ILMN_2633805 | NM_053164.3    | MRPL43        | -0.202060156 |
| ILMN_2766616 | NM_023314.3    | EIF4E2        | -0.20231547  |
| ILMN_1214241 | NM_013862.4    | RABGAP1L      | -0.202393714 |
| ILMN_1230697 |                | 6430540M20RIK | -0.202641871 |
| ILMN_3041258 | NM_001033314.1 | C530028I08RIK | -0.202680108 |
| ILMN_1228922 | NM_028017.1    | NAPG          | -0.202735487 |
| ILMN_2633492 | NM_016681.3    | CHEK2         | -0.202778126 |
| ILMN_1215400 | NM_031868.2    | PPP1CA        | -0.202897204 |
| ILMN_2787871 | NM_026410.1    | CDCA5         | -0.202963674 |
| ILMN_1260420 | NM_146177.1    | SUV420H2      | -0.203031151 |
| ILMN_1222346 |                | A630097D09RIK | -0.203048363 |
| ILMN_3104094 | NM_145626.1    | 2610208M17RIK | -0.203282517 |
| ILMN_2945588 | NM_023317.1    | NDE1          | -0.203290195 |
| ILMN_2629718 | NM_029759.2    | 2410166I05RIK | -0.203507449 |
| ILMN_2764865 | NM_025909.3    | OMA1          | -0.203559044 |
| ILMN_1244535 | NM_030732.3    | TBL1XR1       | -0.203633635 |
| ILMN_2894763 | NM_001034860.1 | LOC229571     | -0.203671448 |
| ILMN_2686825 | XM_912450.2    | 5430427O19RIK | -0.203812638 |
| ILMN_2710380 | NM_029885.1    | GABPB2        | -0.203963649 |
| ILMN_3144963 | NM_027139.3    | TAF9          | -0.203989994 |
| ILMN_2715558 | NM_144529.1    | ARHGAP17      | -0.204049906 |
| ILMN_3114898 | NM_001081191.1 | EML5          | -0.204140673 |
| ILMN_2707079 | NM_178848.3    | SIRT5         | -0.20429259  |
| ILMN_1230107 | XM_143290.1    | LOC229494     | -0.204372123 |
| ILMN_2764883 | NM_010756.3    | MAFG          | -0.204565492 |
| ILMN_2609129 | NM_144934.2    | MBD3L2        | -0.204701664 |
| ILMN_2628339 | NM_001083334.1 | BIN1          | -0.20482938  |

|              |                |               |                    |
|--------------|----------------|---------------|--------------------|
| ILMN_2834294 | NM_178745.3    | 6330442E10RIK | -0.204835238       |
| ILMN_1244303 | NR_002321.1    | TUG1          | -0.205021964       |
| ILMN_2686087 | NM_025530.2    | CUTC          | -0.205124016       |
| ILMN_3145213 | NM_008210.2    | H3F3A         | -0.20523521        |
| ILMN_3009719 | NM_178912.3    | FANCM         | -0.20528703        |
| ILMN_2762326 | NM_145588.1    | KIF22         | -0.205314185       |
| ILMN_2697990 | NM_013791.2    | MKLN1         | -0.205470241       |
| ILMN_1231417 | NM_001085355.1 | ARID1B        | -0.205694578       |
| ILMN_1241939 | XM_001473948.1 | LOC100045262  | -0.2061703         |
| ILMN_2771374 |                | BC023835      | -0.206211437       |
| ILMN_1233664 | NM_145430.1    | BC017647      | -0.206297563       |
| ILMN_2980212 | NM_027001.1    | 2610034M16RIK | -0.206326087       |
| ILMN_2625867 | NM_019942.4    |               | Sept6 -0.206366691 |
| ILMN_2738031 | NM_145415.2    | AA408296      | -0.206533287       |
| ILMN_2594149 | NM_025321.2    | SDHC          | -0.206534625       |
| ILMN_2671259 | NM_133916.2    | EIF3B         | -0.206664741       |
| ILMN_2741614 | NM_176996.3    | SMO           | -0.206681844       |
| ILMN_1259798 | NM_175310.5    | APRIN         | -0.207021513       |
| ILMN_1237095 |                | 4921521J11RIK | -0.207039313       |
| ILMN_1258977 | NM_028975.3    | TMEM33        | -0.207113556       |
| ILMN_2626098 | NM_177741.2    | PPP1R3B       | -0.207147859       |
| ILMN_1252951 | NM_027915.1    | AP2B1         | -0.207149081       |
| ILMN_2753492 | NM_009068.3    | RIPK1         | -0.207219874       |
| ILMN_1233857 | NM_008567.1    | MCM6          | -0.207408069       |
| ILMN_2634670 |                | MEP1B         | -0.207599428       |
| ILMN_1221199 | NM_176833.3    | PPM1F         | -0.207614858       |
| ILMN_1252885 | XM_356903.1    | LOC383162     | -0.207633985       |
| ILMN_1255996 | NM_009613.1    | ADAM11        | -0.207918022       |
| ILMN_2591754 | NM_133686.1    | QPRT          | -0.20822258        |
| ILMN_1216763 | NM_030147.2    | BRD8          | -0.208263662       |
| ILMN_2806290 | NM_025991.1    | KBTBD4        | -0.208399257       |
| ILMN_2747828 | NM_027270.1    | EXOC1         | -0.208456481       |
| ILMN_1239143 | NM_025848.2    | SDHD          | -0.208608946       |
| ILMN_2491792 | NM_030559.2    | VPS16         | -0.208623087       |
| ILMN_3074516 | NM_134138.1    | PSMG2         | -0.208656272       |
| ILMN_2604676 | NM_019833.2    | B230317C12RIK | -0.208732958       |
| ILMN_1228733 | NM_020586.1    | HERPUD2       | -0.208800217       |
| ILMN_2601884 | NM_001042671.1 | PREI4         | -0.208837252       |
| ILMN_2955535 | NM_025343.3    | RMND1         | -0.208963458       |
| ILMN_2993711 | NM_177798.3    | FRS2          | -0.209068036       |
| ILMN_2744752 | NM_024182.4    | RIOK3         | -0.209231308       |
| ILMN_3123657 | NM_001029843.1 | VRK1          | -0.209358223       |
| ILMN_1223168 |                | CDC23         | -0.209376783       |
| ILMN_2651643 | NM_013608.2    | NACA          | -0.209410436       |
| ILMN_2733514 | XM_001475447.1 | LOC100046039  | -0.209575373       |
| ILMN_2970623 | NM_025495.1    | CENPP         | -0.209585368       |

|              |                |               |              |
|--------------|----------------|---------------|--------------|
| ILMN_2892222 | NM_027976.2    | ACSL5         | -0.209897706 |
| ILMN_2946020 | NM_152895.1    | JARID1B       | -0.209926208 |
| ILMN_2707808 | XM_001472989.1 | LOC100044756  | -0.210476379 |
| ILMN_2826916 | NM_011212.2    | PTPRE         | -0.210482155 |
| ILMN_2856668 | NM_001029990.1 | METT11D1      | -0.210634018 |
| ILMN_2658610 | XM_194372.3    | AI849286      | -0.210893335 |
| ILMN_2633212 | NM_178379.2    | COX10         | -0.210913608 |
| ILMN_2596324 | NM_138594.3    | D6WSU163E     | -0.210922295 |
| ILMN_1217408 | NM_011100.3    | PRKACB        | -0.210948898 |
| ILMN_2659408 | NM_009044.2    | REL           | -0.211111073 |
| ILMN_2896601 | NM_010493.2    | ICAM1         | -0.211220659 |
| ILMN_1258453 | NM_026664.2    | VPS53         | -0.211479757 |
| ILMN_2670727 | NM_025652.2    | GTF3A         | -0.211564108 |
| ILMN_1229256 | NM_172449.1    | BZRAP1        | -0.21161294  |
| ILMN_2520953 |                | 4930565B19RIK | -0.211645462 |
| ILMN_1213808 | XM_194481.2    | LOC270186     | -0.211685232 |
| ILMN_1242013 | NM_030724.3    | UCK2          | -0.211712964 |
| ILMN_2893749 | NM_010443.1    | HMOX2         | -0.211752411 |
| ILMN_1256518 | NM_025337.2    | AKR7A5        | -0.211824243 |
| ILMN_2788984 | NM_177470.2    | ACAA2         | -0.211850444 |
| ILMN_1250564 | NM_007808.4    | CYCS          | -0.212047587 |
| ILMN_1233606 | NM_027324.4    | SFXN1         | -0.212108783 |
| ILMN_2657867 | NM_008437.1    | NAPSA         | -0.212175543 |
| ILMN_1222350 |                | SURF6         | -0.212196424 |
| ILMN_2740922 | NM_023331.2    | MRPL46        | -0.212385656 |
| ILMN_2681013 | NM_001025311.1 | ST6GALNAC6    | -0.212682187 |
| ILMN_2675740 | NM_175439.3    | MARS2         | -0.212732697 |
| ILMN_1258682 | NM_023138.3    | MAP2K2        | -0.212869884 |
| ILMN_2790735 | NM_172517.1    | RBBP5         | -0.212976527 |
| ILMN_2651642 | NM_013608.2    | NACA          | -0.213134102 |
| ILMN_2715201 | NM_133852.1    | GOLGA2        | -0.213134533 |
| ILMN_2688215 | XM_001478845.1 | 5830417I10RIK | -0.213214912 |
| ILMN_2629420 | NM_175445.3    | RASSF2        | -0.213346237 |
| ILMN_2654932 | NM_001033313.3 | PDAP1         | -0.214081551 |
| ILMN_2971744 | NM_007415.2    | PARP1         | -0.214177871 |
| ILMN_2637321 | NM_145589.2    | PRR14         | -0.214236419 |
| ILMN_2748708 | NM_026157.2    | PAPD1         | -0.214314882 |
| ILMN_2458854 |                | CCNT2         | -0.214349457 |
| ILMN_1242905 | NM_001033294.2 | DDX31         | -0.214442419 |
| ILMN_2606180 | NM_133348.1    | ACOT7         | -0.214712088 |
| ILMN_2713362 | NM_021294.1    | DBIL5         | -0.214742259 |
| ILMN_2716602 | NM_010708.1    | LGALS9        | -0.214911886 |
| ILMN_2712994 | NM_153092.3    | NUPL2         | -0.21491287  |
| ILMN_2465890 |                | 4930445K14RIK | -0.215095658 |
| ILMN_2693785 | NM_021886.1    | CENPH         | -0.215143228 |
| ILMN_2701030 | NM_027561.2    | 4632415L05RIK | -0.21534656  |



|              |                |               |              |
|--------------|----------------|---------------|--------------|
| ILMN_2879506 | NM_133714.2    | 2310037I24RIK | -0.215503394 |
| ILMN_1216632 | NM_133926.2    | CAMK1         | -0.215583327 |
| ILMN_2433213 |                | KLF7          | -0.215585455 |
| ILMN_1253545 | NM_010799.1    | MINPP1        | -0.215631356 |
| ILMN_1224876 | NM_027318.3    | ZNHIT1        | -0.215734393 |
| ILMN_2623244 | NM_012024.2    | PPP2R5E       | -0.215839322 |
| ILMN_1246299 | NM_001001447.2 | ZSCAN22       | -0.215882222 |
| ILMN_2744337 | NM_010581.3    | CD47          | -0.215953632 |
| ILMN_1234147 |                | D930031I08RIK | -0.216015898 |
| ILMN_3060512 | NM_001039089.1 | SEL1L         | -0.216195369 |
| ILMN_1249014 | NM_011538.2    | TBX6          | -0.216195826 |
| ILMN_1254215 |                | TCTA          | -0.216220193 |
| ILMN_1229056 | NM_138587.4    | D6WSU176E     | -0.216251211 |
| ILMN_1244112 | NM_020046.3    | DHODH         | -0.216280278 |
| ILMN_1234749 |                | C030025P15RIK | -0.216291648 |
| ILMN_2513837 | NM_025277.3    | GNG10         | -0.216408734 |
| ILMN_3139818 | NM_001081030.1 | SBF1          | -0.216436281 |
| ILMN_2675261 | NM_011528.3    | TALDO1        | -0.216582268 |
| ILMN_1230846 | XM_284425.1    | 2810422J05RIK | -0.216629482 |
| ILMN_2962606 | NM_011967.2    | PSMA5         | -0.216716801 |
| ILMN_2737480 | NM_022433.1    | SIRT3         | -0.216756735 |
| ILMN_1231035 | NM_027874.2    | CSNK1D        | -0.216759263 |
| ILMN_3095059 | NM_025883.3    | ZDHHC6        | -0.21679273  |
| ILMN_1235751 | NM_026824.4    | DUS1L         | -0.217061879 |
| ILMN_2710705 | NM_011018.2    | SQSTM1        | -0.217224864 |
| ILMN_1250201 | NM_178699.3    | B930041F14RIK | -0.217353514 |
| ILMN_1227086 | NM_020272.1    | PIK3CG        | -0.217423212 |
| ILMN_2784230 | NM_009183.1    | ST8SIA4       | -0.217571108 |
| ILMN_2787738 | NM_144918.1    | SMYD5         | -0.217647377 |
| ILMN_3072536 | NM_173363.4    | EIF5          | -0.217695777 |
| ILMN_2633511 | NM_009881.2    | CDYL          | -0.21775128  |
| ILMN_2735118 | NM_001081214.1 | PPRC1         | -0.217822252 |
| ILMN_3111593 | NM_011573.2    | TEX264        | -0.217831601 |
| ILMN_2638354 | NM_011563.2    | PRDX2         | -0.217917086 |
| ILMN_2594558 | NM_173015.2    | MON1B         | -0.218074899 |
| ILMN_2666118 | NM_138305.2    | ADCY3         | -0.218159964 |
| ILMN_2738837 | NM_022988.2    | NIF3L1        | -0.218315364 |
| ILMN_2570841 |                | D430018E21RIK | -0.218648495 |
| ILMN_2737319 | XM_905813.3    | LOC627985     | -0.218702511 |
| ILMN_2755492 | NM_138587.3    | D6WSU176E     | -0.218724486 |
| ILMN_2450147 | NM_013915.3    | ZFP238        | -0.218760543 |
| ILMN_2753029 | NM_008102.2    | GCH1          | -0.218845126 |
| ILMN_2698107 | NM_010120.4    | EIF1A         | -0.21896071  |
| ILMN_2987027 | NM_138752.1    | PLEKHG2       | -0.219027263 |
| ILMN_1226280 | NM_026578.2    | NOLA1         | -0.219036541 |
| ILMN_2896049 | NM_213733.1    | NPEPL1        | -0.219190966 |

|              |                |               |              |
|--------------|----------------|---------------|--------------|
| ILMN_2551506 |                | 4933433P14RIK | -0.219204885 |
| ILMN_1220553 |                | 5830461H18RIK | -0.219258936 |
| ILMN_2590015 | NM_025598.2    | 2700038C09RIK | -0.219305469 |
| ILMN_2694998 | NM_026885.2    | CHMP2A        | -0.219366735 |
| ILMN_2523757 | XM_485308.4    | 4930422G04RIK | -0.219500308 |
| ILMN_2605094 | NM_025546.1    | RSL1D1        | -0.219518985 |
| ILMN_1225719 | XM_134910.3    | IREB2         | -0.219579764 |
| ILMN_1257900 |                | PRLR          | -0.219590623 |
| ILMN_1249828 | NM_027249.2    | TLCD2         | -0.219714638 |
| ILMN_1257520 | NM_178201.1    | HIST1H2BN     | -0.21989072  |
| ILMN_2641669 | NM_173423.3    | FEM1C         | -0.219892737 |
| ILMN_1234247 | XM_912678.2    | LOC637089     | -0.219920433 |
| ILMN_3051651 | NM_024181.2    | DNAJC10       | -0.220133323 |
| ILMN_2786160 | NM_146124.2    | ARHGAP1       | -0.220136667 |
| ILMN_2593196 | NM_009283.3    | STAT1         | -0.22024363  |
| ILMN_3155245 | NM_175476.3    | ARHGAP25      | -0.220314452 |
| ILMN_2704855 | XM_001478657.1 | LOC100047674  | -0.220517998 |
| ILMN_2569275 |                | ITCH          | -0.220694871 |
| ILMN_2741726 | NM_030597.2    | LSM2          | -0.220762201 |
| ILMN_2932787 | NM_183162.2    | BC006779      | -0.22078515  |
| ILMN_3096287 | NM_029510.1    | BCOR          | -0.221089401 |
| ILMN_2724719 | NM_197981.1    | 5930416I19RIK | -0.221119179 |
| ILMN_1238246 | NM_026194.3    | 1810074P20RIK | -0.221168095 |
| ILMN_1254659 |                | CD2AP         | -0.221169472 |
| ILMN_2698239 | NM_145959.1    | D15ERTD621E   | -0.22125399  |
| ILMN_1238360 | XM_001478555.1 | LOC100042405  | -0.221263495 |
| ILMN_1240163 | XM_132796.4    | FANCD2        | -0.221411104 |
| ILMN_2774927 |                | A930029B02RIK | -0.22159509  |
| ILMN_1236157 | NM_001081956.1 | SFRS17B       | -0.221673126 |
| ILMN_2523012 |                | GTL2          | -0.22168095  |
| ILMN_1215755 | NM_153419.1    | GRWD1         | -0.221688967 |
| ILMN_2862760 | NM_010273.1    | GDI1          | -0.221781927 |
| ILMN_3141738 | NM_198311.1    | TTC8          | -0.221959621 |
| ILMN_2925196 | NM_009702.1    | AQR           | -0.222007961 |
| ILMN_2703242 | NM_153549.2    | BC031575      | -0.222022201 |
| ILMN_2764143 | NM_001001144.1 | SCAP          | -0.222025745 |
| ILMN_2696299 | NM_001081232.1 | D5ERTD579E    | -0.222383458 |
| ILMN_2671855 | NM_172276.3    | SFRS8         | -0.222393634 |
| ILMN_1240702 | NM_007502.3    | ATP1B3        | -0.222410031 |
| ILMN_2543107 |                | OSM           | -0.222411174 |
| ILMN_2481389 | NM_018759.1    | ZFP326        | -0.22246048  |
| ILMN_1221373 |                | SLC9A2        | -0.222555465 |
| ILMN_2729263 | NM_009940.2    | COQ7          | -0.222606884 |
| ILMN_2705673 | NM_138584.2    | SPG21         | -0.222714426 |
| ILMN_2732896 | NM_025671.1    | OGFOD2        | -0.222745713 |
| ILMN_2692262 | XM_203753.2    | FVT1          | -0.222772892 |

|              |                |               |              |
|--------------|----------------|---------------|--------------|
| ILMN_2949122 | NM_198645.1    | CCDC58        | -0.222780826 |
| ILMN_2622829 | NM_026269.1    | 1110007L15RIK | -0.222789545 |
| ILMN_2968729 | NM_020282.2    | NQO2          | -0.222846922 |
| ILMN_1232305 | XM_993721.1    | LOC672474     | -0.222859569 |
| ILMN_2758029 | NM_011178.2    | PRTN3         | -0.223022433 |
| ILMN_1253453 | XM_356003.1    | 2210018M11RIK | -0.223079352 |
| ILMN_2715153 | NM_027134.2    | MTFMT         | -0.223199723 |
| ILMN_1216174 | NM_177460.3    | PARP16        | -0.22325548  |
| ILMN_2683822 | NM_019706.2    | RNF138        | -0.223367423 |
| ILMN_2668001 | NM_026396.2    | BXDC2         | -0.223447828 |
| ILMN_2764819 | NM_008996.3    | RAB1          | -0.223471546 |
| ILMN_2750676 | NM_181406.2    | RARS2         | -0.223594356 |
| ILMN_1242613 | NM_198423.2    | BAHCC1        | -0.223634632 |
| ILMN_2607450 | NM_001081041.1 | 1110014N23RIK | -0.223717804 |
| ILMN_2732689 | NM_019710.1    | SMC1A         | -0.223759802 |
| ILMN_1245874 | NM_011202.2    | PTPN11        | -0.223868571 |
| ILMN_1234100 | NM_133889.2    | BSDC1         | -0.224078105 |
| ILMN_2803289 | NM_009359.2    | TEX9          | -0.224113137 |
| ILMN_2754220 | NM_172843.2    | TOR1AIP2      | -0.22418346  |
| ILMN_2650914 | NM_010048.2    | DGCR2         | -0.224221292 |
| ILMN_2715289 | NM_001081188.1 | EXOSC7        | -0.22429096  |
| ILMN_2465068 | NM_025362.3    | DNAJC30       | -0.224319233 |
| ILMN_2479432 |                | ZFP251        | -0.224346366 |
| ILMN_1236574 | NM_007681.2    | CENPA         | -0.224352123 |
| ILMN_1248315 | XM_990152.1    | LOC667368     | -0.224402404 |
| ILMN_1248468 | XR_031426.1    | LOC632684     | -0.224621527 |
| ILMN_2655774 | NM_023260.1    | MRPS34        | -0.224739164 |
| ILMN_1215055 | NM_011585.3    | TIA1          | -0.224976087 |
| ILMN_2655260 | NM_008975.2    | PTP4A3        | -0.224996588 |
| ILMN_2822842 | NM_028166.2    | 1600014C10RIK | -0.225017926 |
| ILMN_2752224 | NM_025434.2    | MRPS28        | -0.225172972 |
| ILMN_2733330 | NM_016959.2    | RPS3A         | -0.225222685 |
| ILMN_3163163 | NM_001033378.2 | A430078G23RIK | -0.225237772 |
| ILMN_2936496 | NM_024241.1    | KIF24         | -0.225377871 |
| ILMN_1232770 | NM_183426.1    | SBNO2         | -0.225428953 |
| ILMN_3123970 | NM_001077712.1 | STAG2         | -0.225471661 |
| ILMN_3084954 | NM_011570.2    | TES           | -0.225520603 |
| ILMN_1216762 |                | A530065H22RIK | -0.225585827 |
| ILMN_2644587 | NM_025840.2    | BZW2          | -0.225607632 |
| ILMN_2624827 | NM_025674.1    | TCF19         | -0.225656816 |
| ILMN_3145331 | NM_025284.3    | TMSB10        | -0.225731851 |
| ILMN_1225146 | NM_133218.1    | ZFP704        | -0.225784791 |
| ILMN_2913269 | NM_145972.1    | BC027231      | -0.226001265 |
| ILMN_2831579 | NM_027008.1    | KCTD5         | -0.226093569 |
| ILMN_2774244 |                | 1810013B01RIK | -0.226314994 |
| ILMN_2738554 | XM_001472680.1 | LOC100044636  | -0.226467464 |

|              |                |               |              |
|--------------|----------------|---------------|--------------|
| ILMN_1221039 | NM_027698.4    | EXOD1         | -0.226719785 |
| ILMN_3161897 | NM_001013380.1 | DYNC1LI2      | -0.226821345 |
| ILMN_3126933 | NM_199323.2    | TACC1         | -0.227033062 |
| ILMN_2678801 | NM_023887.3    | GCNT2         | -0.227088823 |
| ILMN_1239638 | NM_011804.2    | CREG1         | -0.227186254 |
| ILMN_1252068 | NM_025292.4    | SYNJ2BP       | -0.227195473 |
| ILMN_1235060 |                | 1700015E05RIK | -0.227262997 |
| ILMN_1254878 | NM_025829.4    | EIF4E3        | -0.227303603 |
| ILMN_2528594 | XM_354837.1    | LOC380929     | -0.227506551 |
| ILMN_1215242 | NM_145371.3    | EIF2B1        | -0.227648487 |
| ILMN_2700505 | NM_028766.2    | TMEM43        | -0.227660117 |
| ILMN_2684260 | NM_134092.2    | MTBP          | -0.227670124 |
| ILMN_2548577 |                | 6620401C13RIK | -0.227751297 |
| ILMN_3143483 | NM_022964.3    | LAT2          | -0.227852214 |
| ILMN_1215084 |                | 2500003M10RIK | -0.228046283 |
| ILMN_2684575 | NM_172832.1    | PCYOX1L       | -0.228123716 |
| ILMN_2796028 | NM_145414.1    | NSUN5         | -0.228207235 |
| ILMN_2816180 | NM_029999.3    | LBH           | -0.228358251 |
| ILMN_2649172 | NM_025893.2    | ZCCHC18       | -0.228430457 |
| ILMN_2419494 | NM_009400.1    | TNFRSF18      | -0.228431241 |
| ILMN_2642158 | NM_026536.1    | ATP5S         | -0.228581793 |
| ILMN_2491654 | NM_026872.1    | UBAP2         | -0.228764005 |
| ILMN_2745614 | NM_025459.2    | FAM134B       | -0.229192238 |
| ILMN_3155217 | NM_011799.2    | CDC6          | -0.229270339 |
| ILMN_1220618 | XM_355660.1    | LOC381684     | -0.229375204 |
| ILMN_2606108 |                | CDC40         | -0.229377757 |
| ILMN_1257873 | XM_146887.7    | LAYN          | -0.229906473 |
| ILMN_2707298 | NM_011879.1    | IK            | -0.23010389  |
| ILMN_3006767 | NM_029005.1    | MLKL          | -0.230525336 |
| ILMN_2712557 | NM_024439.3    | H47           | -0.230536446 |
| ILMN_2484707 | NM_021288.3    | TYMS          | -0.230582674 |
| ILMN_2734848 | NM_001025387.2 | BRD2          | -0.230615296 |
| ILMN_2642063 | NM_026729.1    | ICT1          | -0.230641832 |
| ILMN_2908874 | NM_024260.3    | CCDC132       | -0.230908879 |
| ILMN_2825339 | NM_024287.2    | RAB6          | -0.230912479 |
| ILMN_2754253 | NM_010303.2    | GNA13         | -0.23092088  |
| ILMN_2528456 | XM_139078.2    | LOC219106     | -0.231220769 |
| ILMN_2621113 | NM_015791.3    | FBXO8         | -0.231265145 |
| ILMN_3163020 | NM_001025360.2 | KLC1          | -0.231362523 |
| ILMN_2440789 | NM_145600.1    | ZFP330        | -0.231366896 |
| ILMN_3113420 | NM_013545.2    | PTPN6         | -0.231490774 |
| ILMN_2579391 |                | D330026F23RIK | -0.231573772 |
| ILMN_2774163 | NM_018749.2    | EIF3D         | -0.231582124 |
| ILMN_1248028 | NM_010129.1    | EMP3          | -0.231610911 |
| ILMN_1260303 | NM_178079.2    | PM20D1        | -0.231667306 |
| ILMN_1212669 |                | A630046I07RIK | -0.231714239 |

|              |                |                   |              |
|--------------|----------------|-------------------|--------------|
| ILMN_1216614 | NM_001024508.2 | BRD9              | -0.23173016  |
| ILMN_2559524 |                | DRCTNNB1A-PENDING | -0.231766597 |
| ILMN_1245918 | NM_025609.2    | MAP3K7IP1         | -0.231791593 |
| ILMN_2625746 | NM_146171.1    | NCAPD2            | -0.231802594 |
| ILMN_2755443 | NM_021389.3    | SH3KBP1           | -0.231828016 |
| ILMN_1221895 | NM_145414.2    | NSUN5             | -0.231975422 |
| ILMN_2612502 | NM_153053.3    | SF3B4             | -0.232016462 |
| ILMN_2858359 | NM_175554.3    | CLSPN             | -0.232213419 |
| ILMN_2420119 |                | 2610103J23RIK     | -0.232229008 |
| ILMN_3125920 | NM_008641.2    | MAST2             | -0.232237165 |
| ILMN_2684268 | NM_145926.2    | MGAT4B            | -0.232321375 |
| ILMN_1259056 |                | HNRPAB            | -0.232334392 |
| ILMN_3000108 | NM_030145.1    | LSM6              | -0.232342219 |
| ILMN_1234558 | NM_030108.1    | TMEM33            | -0.232422562 |
| ILMN_1243593 | NM_029508.3    | PCGF5             | -0.232444109 |
| ILMN_1248439 | NM_011373.2    | ST6GALNAC4        | -0.232472663 |
| ILMN_3039637 | NM_145428.1    | DHRS7B            | -0.232555494 |
| ILMN_1255365 | NM_172054.4    | TXNDC9            | -0.232570072 |
| ILMN_1252963 | NM_175025.2    | ATP2C1            | -0.232694206 |
| ILMN_1235921 |                | A930005G04RIK     | -0.23283591  |
| ILMN_3163374 | NM_001037755.2 | BAIAP2            | -0.232952242 |
| ILMN_2429250 | NR_002899.1    | SNORA70           | -0.233002454 |
| ILMN_2473357 |                | 2210418H06RIK     | -0.233032602 |
| ILMN_2620078 | NM_022994.2    | DAP3              | -0.233220393 |
| ILMN_2747614 | NM_001083958.1 | ZFP655            | -0.233291093 |
| ILMN_2476999 | XM_001004293.1 | DDX23             | -0.23343613  |
| ILMN_2450121 | XM_001002157.2 | AKAP11            | -0.233553901 |
| ILMN_2997796 | NM_175403.2    | 2410014A08RIK     | -0.233562614 |
| ILMN_2620959 | NM_028868.3    | CXXC1             | -0.233579858 |
| ILMN_1230357 | NM_010585.3    | ITPR1             | -0.233638187 |
| ILMN_1248831 |                | 2210019E14RIK     | -0.23387718  |
| ILMN_2689785 | NM_009853.1    | CD68              | -0.23392521  |
| ILMN_2544634 | XM_921694.2    | 0610030E20RIK     | -0.234078346 |
| ILMN_1244737 | NM_001081013.1 | RLF               | -0.234136034 |
| ILMN_2807474 | NM_026746.1    | NSMCE2            | -0.234218663 |
| ILMN_1239661 | NM_001039137.2 | SCOC              | -0.234705735 |
| ILMN_1237007 | NM_027933.2    | RANBP3            | -0.234725046 |
| ILMN_1229793 | NM_177240.3    | D030016E14RIK     | -0.234779118 |
| ILMN_2477267 | NM_178744.1    | ZBTB1             | -0.234883463 |
| ILMN_2425028 | XM_001481199.1 | LOC675572         | -0.234963142 |
| ILMN_1216072 | NM_027000.4    | GTPBP4            | -0.235242502 |
| ILMN_2868997 | NM_011241.3    | RANGAP1           | -0.235256803 |
| ILMN_1212703 | NM_021284.4    | KRAS              | -0.235632156 |
| ILMN_2963580 | NM_172947.1    | LSM12             | -0.235675817 |
| ILMN_2620501 | XM_001479864.1 | D030022P06RIK     | -0.23577041  |
| ILMN_2604922 | NM_030564.1    | RNF34             | -0.235790666 |

|              |                |               |              |
|--------------|----------------|---------------|--------------|
| ILMN_1242889 | NM_177073.5    | RELT          | -0.235883993 |
| ILMN_2646938 | NM_013604.1    | MTX1          | -0.235973917 |
| ILMN_2564205 |                | PIK3CG        | -0.236108621 |
| ILMN_1217827 | NM_026511.1    | 2810002N01RIK | -0.236162313 |
| ILMN_2774640 | NM_007550.3    | BLM           | -0.236335733 |
| ILMN_1252433 |                | AVPR2         | -0.236358383 |
| ILMN_1243507 | NM_145134.2    | SPSB4         | -0.236358579 |
| ILMN_2661971 | NM_010299.2    | GM2A          | -0.236371528 |
| ILMN_2739965 | NM_027874.2    | CSNK1D        | -0.236388807 |
| ILMN_1247267 | NM_145533.1    | SMOX          | -0.236527397 |
| ILMN_2633377 | XR_031705.1    | LOC100045677  | -0.236556878 |
| ILMN_2775586 | NM_017366.2    | ACADVL        | -0.236765836 |
| ILMN_2648695 | NM_133679.1    | CRYZL1        | -0.2368217   |
| ILMN_2660519 | NM_027289.1    | NT5DC2        | -0.236976299 |
| ILMN_2667842 | NM_025289.1    | TBRG1         | -0.236982608 |
| ILMN_2871174 | NM_027382.1    | HDAC8         | -0.237102488 |
| ILMN_1252243 | NM_026660.2    | MFSD10        | -0.237130068 |
| ILMN_1216292 | NM_026539.2    | CHD1L         | -0.237232484 |
| ILMN_2656268 | NM_172409.2    | FMNL2         | -0.237249381 |
| ILMN_1223713 | NM_146124.3    | ARHGAP1       | -0.237363562 |
| ILMN_2710312 | XM_001476721.1 | LOC100046650  | -0.237428691 |
| ILMN_2615448 | NM_178909.3    | AI553587      | -0.237573343 |
| ILMN_2805339 | NM_001012401.1 | HSPB6         | -0.237722719 |
| ILMN_1214126 | NM_019479.2    | HES6          | -0.23773412  |
| ILMN_2541505 | NM_177184.3    | VPS13C        | -0.237814102 |
| ILMN_2705979 | NM_008796.2    | PCTP          | -0.237862485 |
| ILMN_2420366 | NM_178794.3    | ZRSR2         | -0.237980727 |
| ILMN_2664972 | NM_007896.3    | MAPRE1        | -0.238161372 |
| ILMN_3024068 | NM_001039129.1 | HNRPA1        | -0.238190215 |
| ILMN_2477326 | NM_001037938.1 | DHRS4         | -0.238238447 |
| ILMN_1220039 | NM_008446.1    | KIF4          | -0.238287395 |
| ILMN_2883110 | NM_019478.3    | PQBP1         | -0.238439319 |
| ILMN_2514451 | NM_012049.1    | NIT1          | -0.238486574 |
| ILMN_1228352 | NM_138592.3    | USP39         | -0.238686021 |
| ILMN_3108770 | NM_001005866.1 | FBXL10        | -0.238776658 |
| ILMN_2749747 | NM_029621.2    | 2410004L22RIK | -0.238808531 |
| ILMN_2473692 |                | 1110059G02RIK | -0.239082042 |
| ILMN_2627995 | NM_133215.1    | MTMR4         | -0.239095898 |
| ILMN_1229318 | NM_172665.3    | PDK1          | -0.239114893 |
| ILMN_2743013 | NM_008677.1    | NCF4          | -0.239164065 |
| ILMN_2753021 | XM_134599.3    | RNF166        | -0.23918547  |
| ILMN_2612403 | NM_030153.1    | MAK10         | -0.239189654 |
| ILMN_1229309 |                | VRK1          | -0.239231362 |
| ILMN_2843403 | NM_178612.3    | 2610019P18RIK | -0.239314881 |
| ILMN_2877507 | NM_011822.3    | PIGQ          | -0.239431646 |
| ILMN_1250837 |                | RANGAP1       | -0.239434333 |

|              |                |               |              |
|--------------|----------------|---------------|--------------|
| ILMN_2523963 | NM_023595.5    | DUT           | -0.239445069 |
| ILMN_2416145 | NM_028109.3    | TPX2          | -0.23956312  |
| ILMN_2895177 | NM_175266.2    | EPM2AIP1      | -0.239575074 |
| ILMN_2665959 | NM_027355.1    | RNF168        | -0.239729707 |
| ILMN_2715215 | NM_172265.1    | EIF2B5        | -0.23978031  |
| ILMN_2617245 | NM_011568.1    | THOC4         | -0.239929689 |
| ILMN_2700400 | NM_144908.3    | GALNT11       | -0.240054552 |
| ILMN_2988275 | NM_029404.1    | PHF14         | -0.240081066 |
| ILMN_2822552 | NM_173784.3    | UBTD2         | -0.240203716 |
| ILMN_1243663 | NM_001015099.1 | 6030408C04RIK | -0.240211187 |
| ILMN_1257251 | NM_175646.2    | TXNL4B        | -0.24022495  |
| ILMN_3024416 | NM_027448.1    | LCA5          | -0.24024469  |
| ILMN_2458442 |                | USP15         | -0.240245729 |
| ILMN_2439813 |                | SLC16A10      | -0.240267221 |
| ILMN_1221935 | NM_009752.1    | GLB1          | -0.240457303 |
| ILMN_2532046 | XM_205276.1    | LOC278181     | -0.240464166 |
| ILMN_1257135 |                | 3110001P07RIK | -0.240557557 |
| ILMN_1230552 | NM_028887.3    | SMCHD1        | -0.240559357 |
| ILMN_2857993 | NM_009759.2    | BMX           | -0.240645754 |
| ILMN_2728038 | NM_029270.1    | ARHGAP24      | -0.240699161 |
| ILMN_2595282 |                | 2600005C20RIK | -0.240825538 |
| ILMN_2800861 | NM_030178.1    | BRPF1         | -0.241053495 |
| ILMN_2534816 | NM_026445.2    | SUMF2         | -0.241083797 |
| ILMN_2546073 | NM_027946.3    | WDR68         | -0.241390776 |
| ILMN_2871262 | NM_012060.2    | BCAP31        | -0.241549845 |
| ILMN_1255511 | NM_001013392.3 | RREB1         | -0.241648184 |
| ILMN_1224256 | NM_145502.2    | ERLIN1        | -0.242229488 |
| ILMN_2595469 | NM_153518.1    | CCDC65        | -0.242241139 |
| ILMN_2602855 | XM_133073.7    | NUP205        | -0.242350974 |
| ILMN_2525049 | XM_147260.1    | FSTL          | -0.242810282 |
| ILMN_2709446 | XM_282920.1    | POLR2E        | -0.242834321 |
| ILMN_1250948 |                | PTPN2         | -0.243060855 |
| ILMN_2487814 |                | CUL3          | -0.24315815  |
| ILMN_1222902 | NM_026891.2    | CDAN1         | -0.243251493 |
| ILMN_1233812 |                | 3110050L10RIK | -0.243432973 |
| ILMN_2877464 | NM_001005916.2 | ZBTB9         | -0.243451316 |
| ILMN_2731760 | NM_053214.1    | MYO1F         | -0.24347199  |
| ILMN_1259924 |                | 5730470C09RIK | -0.243740128 |
| ILMN_1227103 | NM_027242.3    | 2010007H12RIK | -0.243838622 |
| ILMN_2734661 | NM_024284.1    | HAGH          | -0.244193961 |
| ILMN_2655785 | NM_175665.1    | HIST1H2BK     | -0.244209014 |
| ILMN_2589211 | NM_011592.1    | TIMM44        | -0.244521552 |
| ILMN_1219580 |                | C730009F21RIK | -0.244549401 |
| ILMN_2641150 | XM_001004138.1 | LOC677144     | -0.244561735 |
| ILMN_2525152 |                | E430012K20RIK | -0.244631307 |
| ILMN_2666747 | NM_011816.3    | G3BP2         | -0.244635622 |

|              |                |               |              |
|--------------|----------------|---------------|--------------|
| ILMN_2733026 | NM_080562.4    | UBOX5         | -0.24466408  |
| ILMN_1246903 | NM_007455.2    | AP1G2         | -0.244674767 |
| ILMN_2943699 | NM_027260.1    | VRK2          | -0.244685093 |
| ILMN_1251470 |                | 6030446N20RIK | -0.244761075 |
| ILMN_2675669 | NM_007654.1    | CD72          | -0.244767127 |
| ILMN_2855183 | NM_013512.2    | EPB4.1L4A     | -0.244971834 |
| ILMN_3153285 | NM_010161.3    | EVI2A         | -0.245004547 |
| ILMN_1215928 | NM_011544.2    | TCF12         | -0.245266443 |
| ILMN_2592253 | NM_178206.2    | HIST1H3H      | -0.245428908 |
| ILMN_2972855 | NM_172436.2    | SLC25A12      | -0.245467535 |
| ILMN_1232537 | NM_177305.3    | ARL4C         | -0.245483156 |
| ILMN_2692007 | XM_979393.2    | 4930515G13RIK | -0.245658824 |
| ILMN_2848305 | NM_027438.1    | PNMA1         | -0.245660283 |
| ILMN_1240471 | NM_026159.4    | RETSAT        | -0.245730198 |
| ILMN_1229853 | NM_177231.2    | ARRB1         | -0.245730555 |
| ILMN_1220326 |                | D230016O17    | -0.245896635 |
| ILMN_2681622 | NM_023175.1    | NIT2          | -0.246294795 |
| ILMN_1223097 | NM_015807.1    | NT5C          | -0.246297691 |
| ILMN_2776056 | NM_138956.3    | RASSF3        | -0.246311945 |
| ILMN_1214117 |                | 9530065M15RIK | -0.246576711 |
| ILMN_2472504 |                | PCYOX1        | -0.24657679  |
| ILMN_1223868 | NM_001013779.1 | AIM2          | -0.246764517 |
| ILMN_2689401 | NM_001005846.2 | MCOLN2        | -0.246777252 |
| ILMN_1250454 | NM_001081355.1 | PRDM2         | -0.246811695 |
| ILMN_1227043 | NM_001025431.1 | BTBD3         | -0.246932301 |
| ILMN_2705878 | NM_172397.3    | LIMD2         | -0.246968759 |
| ILMN_2712923 | NM_027860.2    | 0610010F05RIK | -0.24697365  |
| ILMN_2775918 |                | HS1BP3        | -0.247043186 |
| ILMN_1257019 | NM_153161.1    | BC037034      | -0.247380654 |
| ILMN_2696100 | NM_146065.1    | ATF7          | -0.247419551 |
| ILMN_2611821 | NM_019411.4    | PPP2CA        | -0.247927861 |
| ILMN_2645493 | NM_008990.2    | PVRL2         | -0.247967086 |
| ILMN_3128784 | NM_001081168.1 | SAP30L        | -0.24796887  |
| ILMN_1252730 | NM_027722.2    | NUDT4         | -0.247972759 |
| ILMN_1227814 |                | SRR           | -0.24813348  |
| ILMN_2603187 | NM_001081979.1 | MECP2         | -0.24818817  |
| ILMN_2502623 | NM_177263.3    | ZHX3          | -0.248219495 |
| ILMN_2724409 | NM_173423.3    | FEM1C         | -0.248238055 |
| ILMN_2451795 |                | 4931433E08RIK | -0.248415757 |
| ILMN_1243263 | NM_175751.3    | ZFP608        | -0.248420349 |
| ILMN_2474887 | NM_011914.2    | WHSC2         | -0.248446105 |
| ILMN_2439313 |                | 2700084L06RIK | -0.248461028 |
| ILMN_2846812 | NM_013673.2    | SP100         | -0.248598323 |
| ILMN_2563949 |                | PGLS          | -0.24885219  |
| ILMN_2774854 |                | EDG2          | -0.248986759 |
| ILMN_1235509 | NM_001081043.1 | PTPN23        | -0.249054414 |



|              |                |                 |              |
|--------------|----------------|-----------------|--------------|
| ILMN_2655295 | NM_026664.2    | VPS53           | -0.249055914 |
| ILMN_1240883 | NM_011278.1    | RNF4            | -0.249093005 |
| ILMN_2512580 | XM_887149.3    | ZFP511          | -0.249100944 |
| ILMN_2536753 | XM_355485.1    | LOC381525       | -0.249718605 |
| ILMN_2519944 |                | SCL0002124.1_39 | -0.249876404 |
| ILMN_2676716 | NM_023215.5    | 2500003M10RIK   | -0.250005721 |
| ILMN_2444603 |                | HERC1           | -0.250103329 |
| ILMN_2823011 | NM_019472.1    | MYO10           | -0.250213526 |
| ILMN_2766875 | NM_026950.3    | OCIAD2          | -0.250295314 |
| ILMN_1230790 | NM_172635.2    | PATL1           | -0.250390743 |
| ILMN_2732565 | NM_020560.1    | MRPS31          | -0.250555033 |
| ILMN_2468617 | NM_021521.2    | MED12           | -0.250899014 |
| ILMN_1239345 | NM_025541.3    | ASF1A           | -0.250915065 |
| ILMN_2835461 | NM_019836.2    | 2610024G14RIK   | -0.250999117 |
| ILMN_2698673 | NM_172270.1    | 3632413B07RIK   | -0.251067604 |
| ILMN_2541190 | XM_912953.3    | 1500034J01RIK   | -0.251085913 |
| ILMN_1235385 | XM_357953.1    | LOC384943       | -0.251135612 |
| ILMN_1242293 |                | SAST-PENDING    | -0.251227106 |
| ILMN_1253854 | NM_009372.2    | TGIF1           | -0.251370882 |
| ILMN_2454905 | NM_010713.2    | LHX8            | -0.251594069 |
| ILMN_2722081 | NM_007711.2    | CLCN3           | -0.252020786 |
| ILMN_2624695 | NM_133928.2    | CHCHD4          | -0.252133615 |
| ILMN_1257193 | NM_008910.2    | PPM1A           | -0.252223602 |
| ILMN_2770667 | NM_023190.2    | ACIN1           | -0.252293325 |
| ILMN_1234693 | NM_027707.2    | NIPBL           | -0.252364135 |
| ILMN_2543616 |                | 1810006O10RIK   | -0.252431437 |
| ILMN_1253593 | NM_172298.2    | TSHZ3           | -0.252506932 |
| ILMN_1259544 | NM_001081396.1 | WDR67           | -0.252720587 |
| ILMN_1229240 |                | 5830454D03RIK   | -0.253175039 |
| ILMN_2974480 | NM_175246.2    | SNIP1           | -0.253359034 |
| ILMN_2516205 | AK002910.1     | SCL0001118.1_0  | -0.253522196 |
| ILMN_1228258 | NM_025670.4    | 5730403B10RIK   | -0.253571908 |
| ILMN_1225123 | NM_181075.3    | 2610524H06RIK   | -0.253663918 |
| ILMN_1243690 | NM_001077363.1 | PTBP1           | -0.253676074 |
| ILMN_2660056 | NM_025512.2    | ZFAND1          | -0.253854617 |
| ILMN_2723513 | NM_146084.1    | FAM13B          | -0.253974971 |
| ILMN_2608043 | NM_019479.3    | HES6            | -0.254027357 |
| ILMN_1254302 | NM_198326.2    | NSFL1C          | -0.254068475 |
| ILMN_1245092 | NM_011149.2    | PIIB            | -0.254458363 |
| ILMN_2700292 | NM_010376.3    | H13             | -0.254461693 |
| ILMN_2872266 | NM_027667.1    | ARHGAP19        | -0.254616368 |
| ILMN_2842654 | NM_023597.1    | WDR31           | -0.254682475 |
| ILMN_2993661 | NM_025863.2    | TRIM59          | -0.254892134 |
| ILMN_1228859 |                | C87860          | -0.254960568 |
| ILMN_2614825 | NM_011811.3    | FARSB           | -0.255342727 |
| ILMN_2738893 | NM_001081213.1 | ERMP1           | -0.255376358 |

|              |                |               |              |
|--------------|----------------|---------------|--------------|
| ILMN_2678127 | NM_080563.3    | RNF144A       | -0.255394967 |
| ILMN_1229515 |                | 2510008P16RIK | -0.255411131 |
| ILMN_3001135 | NM_177573.3    | 9930104L06RIK | -0.255472762 |
| ILMN_1249626 | XM_143236.3    | LOC242025     | -0.255532813 |
| ILMN_2605575 | NM_024178.2    | ALG14         | -0.255718826 |
| ILMN_2605630 | NM_172724.3    | AA881470      | -0.255727096 |
| ILMN_2521753 | NM_145576.1    | ZFP212        | -0.255792983 |
| ILMN_2879225 | NM_030731.1    | TRIM23        | -0.255901859 |
| ILMN_1258854 | XM_907047.3    | D630023B12RIK | -0.255980421 |
| ILMN_2721208 | NM_144898.1    | MSTO1         | -0.255995559 |
| ILMN_2674425 | NM_025575.3    | SYS1          | -0.256014924 |
| ILMN_2747651 | NM_026115.3    | HAT1          | -0.256156941 |
| ILMN_2757625 | NM_030013.2    | CYP20A1       | -0.256157547 |
| ILMN_2732627 | NM_027423.1    | POLR3B        | -0.256248254 |
| ILMN_1251097 | XM_884529.3    | EG620143      | -0.256665291 |
| ILMN_1232184 | NM_019802.3    | GGCX          | -0.256688095 |
| ILMN_2652857 | NM_008330.1    | IFI47         | -0.256797997 |
| ILMN_1220305 | NM_177474.4    | D19BWG1357E   | -0.256855452 |
| ILMN_1245646 | XM_001481075.1 | LOC100043796  | -0.25686857  |
| ILMN_2929526 | NM_007645.2    | CD37          | -0.257178615 |
| ILMN_1252831 | XM_001003622.2 | 2310014H01RIK | -0.257316309 |
| ILMN_1229777 | NM_001025429.1 | SPAG9         | -0.257390788 |
| ILMN_2761594 | NM_007705.2    | CIRBP         | -0.257411942 |
| ILMN_2960214 | NM_175294.2    | NUCKS1        | -0.257580845 |
| ILMN_2680160 | NM_181665.1    | SDCCAG1       | -0.257691457 |
| ILMN_2595283 | NM_028244.1    | RRP1B         | -0.25771394  |
| ILMN_1243908 | NM_013664.2    | SH3GL1        | -0.258036397 |
| ILMN_2854121 | NM_028603.1    | 2410081M15RIK | -0.258086871 |
| ILMN_2674668 | NM_172403.2    | 2810021J22RIK | -0.258087052 |
| ILMN_2730463 | NM_026014.3    | CDT1          | -0.25819695  |
| ILMN_3069857 | NM_029735.1    | EPRS          | -0.258261831 |
| ILMN_2932722 | NM_153063.1    | ZFP472        | -0.258414524 |
| ILMN_2565791 |                | B230371N03RIK | -0.258428451 |
| ILMN_2493826 | NM_201641.2    | UGT1A10       | -0.258457568 |
| ILMN_3162452 | NM_001098231.1 | PPM2C         | -0.258965652 |
| ILMN_1217590 | NM_009266.3    | SEPHS2        | -0.259076484 |
| ILMN_3088934 | NM_001037279.1 | 2700094K13RIK | -0.259089336 |
| ILMN_2539068 | XM_356969.1    | LOC383293     | -0.259152355 |
| ILMN_2658553 |                | GYS3          | -0.259233443 |
| ILMN_1214094 | NM_206974.1    | KCNRG         | -0.259285765 |
| ILMN_1252760 | NM_054070.2    | AFG3L1        | -0.259418568 |
| ILMN_1219670 | NM_025663.2    | GPATCH4       | -0.259440098 |
| ILMN_2692960 | NM_026184.2    | ERO1LB        | -0.25970981  |
| ILMN_2492491 |                | C030026E19RIK | -0.259796358 |
| ILMN_2673211 | NM_011072.3    | PFN1          | -0.259897842 |
| ILMN_2736611 | NM_026816.3    | GTF2F2        | -0.259929493 |

|              |                |                   |              |
|--------------|----------------|-------------------|--------------|
| ILMN_2694955 | NM_010517.2    | IGFBP4            | -0.259964867 |
| ILMN_2845980 | NM_025542.1    | 2410001C21RIK     | -0.260241046 |
| ILMN_2469448 |                | 4933404K08RIK     | -0.260266701 |
| ILMN_2460850 | AK047172.1     | SCL0004176.1_1597 | -0.260306781 |
| ILMN_1230199 | AK009141.1     | SCL0002312.1_1    | -0.260448495 |
| ILMN_2537214 | XM_355586.1    | LOC381627         | -0.260496382 |
| ILMN_1215304 | NM_001015099.1 | 6030408C04RIK     | -0.260576283 |
| ILMN_1223315 | NM_016741.1    | SCARB1            | -0.260905352 |
| ILMN_2600053 | NM_024211.2    | SLC25A11          | -0.2609088   |
| ILMN_2495289 | NM_016752.1    | SLC35B1           | -0.26093831  |
| ILMN_2428807 |                | A030011A13RIK     | -0.261035908 |
| ILMN_1213898 | XM_149149.1    | LOC228036         | -0.261079847 |
| ILMN_1257525 | NM_198300.2    | CPEB3             | -0.26123047  |
| ILMN_2588650 | NM_199310.1    | CCDC32            | -0.261602344 |
| ILMN_1226991 | NM_017407.1    | SPAG5             | -0.261691449 |
| ILMN_2788574 | NM_198101.1    | GMIP              | -0.261738558 |
| ILMN_2962958 | NM_010948.1    | NUDC              | -0.261882489 |
| ILMN_2631745 | NM_029702.3    | ARFRP1            | -0.261947687 |
| ILMN_2605311 | NM_198894.1    | ABR               | -0.261996084 |
| ILMN_1244908 | NM_019735.3    | APIP              | -0.262024049 |
| ILMN_2491125 | NM_030732.3    | TBL1XR1           | -0.26213972  |
| ILMN_1225332 | NM_001039392.1 | TMSB10            | -0.262159218 |
| ILMN_1252120 |                | ATPI              | -0.262290401 |
| ILMN_1255731 | NR_002870.1    | DNM3OS            | -0.262328663 |
| ILMN_2589556 |                | IKBKB             | -0.262342366 |
| ILMN_2495860 | XM_001478639.1 | 5430411C19RIK     | -0.262466385 |
| ILMN_2614531 | NM_023061.1    | MCAM              | -0.262551455 |
| ILMN_2667100 | NM_025770.3    | ATG10             | -0.262641586 |
| ILMN_1237233 | XM_001475830.1 | LOC100046343      | -0.262746005 |
| ILMN_1259127 | NM_026602.3    | BCAS2             | -0.26283118  |
| ILMN_1228464 | XM_918228.3    | 4930422I07RIK     | -0.263023374 |
| ILMN_1250550 |                | SCL0001259.1_60   | -0.263043867 |
| ILMN_1254840 | NM_011418.1    | SMARCB1           | -0.263392308 |
| ILMN_1240515 | NM_178398.4    | WIPI2             | -0.263408893 |
| ILMN_2550740 |                | A430024H01RIK     | -0.263547569 |
| ILMN_2719507 |                | RAB6              | -0.263620745 |
| ILMN_1243215 |                | WWP1              | -0.263625303 |
| ILMN_2773540 | NM_025920.3    | THAP4             | -0.263667953 |
| ILMN_2524043 | NM_028599.2    | WDR75             | -0.263685421 |
| ILMN_3095279 | NM_001012434.2 | KCTD14            | -0.263707588 |
| ILMN_3059798 | NM_199068.2    | FOXK1             | -0.263765513 |
| ILMN_2527514 | XM_354759.1    | LOC380854         | -0.263768934 |
| ILMN_1225137 | NM_001033279.2 | D17WSU92E         | -0.263801658 |
| ILMN_2763739 | XM_924235.3    | BC032203          | -0.263893472 |
| ILMN_1220483 |                | BTBD2             | -0.263977601 |
| ILMN_2569416 |                | A430080F05RIK     | -0.26424756  |

|              |                |               |              |
|--------------|----------------|---------------|--------------|
| ILMN_2624385 | NM_025917.3    | USE1          | -0.264263307 |
| ILMN_3160348 | NM_028727.1    | NOL9          | -0.264304743 |
| ILMN_1217144 | NM_028162.2    | TBC1D5        | -0.264464205 |
| ILMN_1253906 | XM_896646.2    | BAT2D         | -0.264474478 |
| ILMN_1223667 | NM_009225.2    | SNRPB         | -0.264589319 |
| ILMN_1237939 | NM_028410.1    | PRKRIR        | -0.264789123 |
| ILMN_2763498 | NM_023258.3    | PYCARD        | -0.264808862 |
| ILMN_2797212 | NM_053163.1    | MRPL36        | -0.264936547 |
| ILMN_1228611 | XR_032431.1    | LOC245676     | -0.265077256 |
| ILMN_2855334 | NM_010368.1    | GUSB          | -0.265199778 |
| ILMN_1245842 | NM_026561.3    | NT5C3L        | -0.265455262 |
| ILMN_2726101 | NM_026592.3    | B230118H07RIK | -0.265557723 |
| ILMN_1244393 | NM_029607.1    | 2310003C23RIK | -0.265681022 |
| ILMN_2667300 | NM_025454.2    | ING5          | -0.265852085 |
| ILMN_3141195 | NM_001040686.1 | ZFP692        | -0.265936638 |
| ILMN_1216883 | NM_027911.3    | RAVER1        | -0.266232372 |
| ILMN_2710186 | NM_023402.1    | MYLC2B        | -0.266429479 |
| ILMN_2599164 | NM_172697.2    | PRPF38A       | -0.266772703 |
| ILMN_1230411 | NM_008379.3    | KPNB1         | -0.266793026 |
| ILMN_3163006 | NM_145826.4    | IL17RE        | -0.266985892 |
| ILMN_2678773 | NM_017374.3    | PPP2CB        | -0.267176386 |
| ILMN_2655112 | NM_008840.2    | PIK3CD        | -0.267225256 |
| ILMN_2730784 | NM_019726.3    | GPS2          | -0.26731257  |
| ILMN_2710229 | NM_009831.2    | CCNG1         | -0.267404439 |
| ILMN_2490803 | NM_013859.2    | ZNHIT2        | -0.267449466 |
| ILMN_2422687 | XM_001477026.1 | LOC100046895  | -0.267633815 |
| ILMN_2688863 | NM_019647.5    | RPL21         | -0.26763605  |
| ILMN_2763772 | NM_028003.2    | RPAP3         | -0.267653082 |
| ILMN_2454880 | NM_027494.2    | ZCCHC8        | -0.267744224 |
| ILMN_2736792 | NM_027382.3    | HDAC8         | -0.267802925 |
| ILMN_1213711 | NM_001024206.1 | TRAPPC1       | -0.267866353 |
| ILMN_2618447 | NM_198293.1    | 4921518A06RIK | -0.26790005  |
| ILMN_2543304 |                | ANKRA2        | -0.267926543 |
| ILMN_2833936 | NM_030004.2    | CRYL1         | -0.268161366 |
| ILMN_2666061 | NM_010886.1    | NDUFA4        | -0.268167689 |
| ILMN_2659762 | NM_026310.3    | MRPL18        | -0.268292988 |
| ILMN_2685806 | NM_011793.2    | BANF1         | -0.268451303 |
| ILMN_2816547 | NM_001013608.1 | 9330134C04RIK | -0.26846389  |
| ILMN_1227526 |                | 9330177P18RIK | -0.268516965 |
| ILMN_2748499 | NM_145924.1    | FSHPRH1       | -0.268631232 |
| ILMN_2857679 | NM_011615.2    | DEDD          | -0.268745657 |
| ILMN_1217150 | NM_152807.3    | CCDC137       | -0.26881139  |
| ILMN_2543830 | XM_001006904.1 | LOC674019     | -0.26894207  |
| ILMN_2473348 | XM_358379.1    | TTC13         | -0.268942235 |
| ILMN_2984012 | NM_007997.1    | FDXR          | -0.269044104 |
| ILMN_2718612 | NM_026658.1    | MTO1          | -0.269119761 |

|              |                |               |              |
|--------------|----------------|---------------|--------------|
| ILMN_1249032 | NM_175245.2    | 2410129H14RIK | -0.269166418 |
| ILMN_1249569 | NM_021540.3    | RNF130        | -0.269374511 |
| ILMN_1256257 | XM_001471686.1 | LOC100038882  | -0.269393075 |
| ILMN_2422333 | NM_026508.2    | TRAP1         | -0.269504905 |
| ILMN_2547571 | XR_033404.1    | LOC100047486  | -0.269592187 |
| ILMN_2831283 | NM_028766.1    | TMEM43        | -0.26959976  |
| ILMN_1237571 |                | MRGPRA2       | -0.269625385 |
| ILMN_2680038 | NM_028778.3    | NUAK2         | -0.269650754 |
| ILMN_1220244 | NM_011098.3    | PITX2         | -0.269696898 |
| ILMN_3006930 | NM_027409.1    | MOSPD1        | -0.269714085 |
| ILMN_2773211 | NM_021284.4    | KRAS          | -0.269799972 |
| ILMN_1212964 | XM_001481316.1 | BC039210      | -0.270039936 |
| ILMN_2724785 | NM_010598.2    | KCNAB2        | -0.27009278  |
| ILMN_2564840 |                | ARAF          | -0.270115339 |
| ILMN_1251104 | NM_027476.2    | ZDHHC24       | -0.270116577 |
| ILMN_3151503 | NM_178684.3    | C130032J12RIK | -0.270128218 |
| ILMN_2593104 | NM_178874.2    | TMCC2         | -0.270193423 |
| ILMN_2984110 | NM_032398.1    | PLVAP         | -0.270292896 |
| ILMN_2659380 | NM_007920.3    | ELF1          | -0.270398105 |
| ILMN_2611186 | XM_984472.1    | 4631422C13RIK | -0.270449158 |
| ILMN_1236683 | NM_013782.4    | PTDSS2        | -0.270534877 |
| ILMN_1243876 | NM_009812.2    | CASP8         | -0.270592688 |
| ILMN_2680876 | NM_028833.3    | IQCE          | -0.270615466 |
| ILMN_2644708 | NM_029648.3    | D19ERTD737E   | -0.270807559 |
| ILMN_1237703 |                | 4932439E07RIK | -0.270812705 |
| ILMN_2547978 |                | 4930400K19RIK | -0.270880955 |
| ILMN_3153207 | NM_001017959.1 | LAMP2         | -0.270910892 |
| ILMN_2742849 | NM_008566.2    | MCM5          | -0.27091171  |
| ILMN_2728270 | NM_008080.4    | B4GALNT1      | -0.270940552 |
| ILMN_2670508 | NM_013819.2    | H2-M3         | -0.270998294 |
| ILMN_2632153 | NM_175384.3    | CDCA2         | -0.271123455 |
| ILMN_2837888 | NM_001036293.2 | NRBF2         | -0.271186078 |
| ILMN_1216057 | NM_010559.2    | IL6RA         | -0.27123189  |
| ILMN_1222315 | XM_001477568.1 | LOC100047167  | -0.271323492 |
| ILMN_1246870 | XM_001481333.1 | SPATA5L1      | -0.271357251 |
| ILMN_2730803 | NM_026530.5    | MPND          | -0.271430635 |
| ILMN_2845991 | NM_021461.2    | MKNK1         | -0.271543303 |
| ILMN_2751935 | NM_013757.1    | SYTL4         | -0.271762562 |
| ILMN_3141048 | NM_009155.3    | SEPP1         | -0.271849252 |
| ILMN_2600763 | NM_008739.3    | NSD1          | -0.272260463 |
| ILMN_1217662 | NM_009733.1    | AXIN1         | -0.272450483 |
| ILMN_1229545 | NM_019825.2    | NCOA6         | -0.273016436 |
| ILMN_2645662 | NM_026436.3    | TMEM86A       | -0.273107219 |
| ILMN_1223979 | NM_028131.3    | CENPN         | -0.273130521 |
| ILMN_1254276 | NM_175662.1    | HIST2H2AC     | -0.273156296 |
| ILMN_1230457 | NM_138309.2    | CD99L2        | -0.27316914  |

|              |                |                |              |
|--------------|----------------|----------------|--------------|
| ILMN_3003152 | NM_178242.2    | TNRC18         | -0.27328435  |
| ILMN_2830898 | NM_023117.1    | CDC25B         | -0.273374244 |
| ILMN_2726579 | NM_008105.2    | GCNT2          | -0.273498323 |
| ILMN_1260512 | NM_010798.1    | MIF            | -0.273558522 |
| ILMN_1241919 |                | 2210414H16RIK  | -0.273662334 |
| ILMN_2667404 | NM_008468.3    | KPNA6          | -0.273720262 |
| ILMN_2600508 | NM_145371.1    | EIF2B1         | -0.273722622 |
| ILMN_2482571 |                | FLNB           | -0.273800962 |
| ILMN_2738242 | NM_019961.2    | PEX3           | -0.273984159 |
| ILMN_2743494 | NM_027002.3    | POLR2D         | -0.274083738 |
| ILMN_2657376 | NM_025623.2    | NIPSNAP3A      | -0.274192941 |
| ILMN_2607196 | NM_144846.4    | 0910001A06RIK  | -0.274211804 |
| ILMN_2665422 | NM_054070.1    | AFG3L1         | -0.274342331 |
| ILMN_1238880 |                | 2310047K21RIK  | -0.274703401 |
| ILMN_2428388 | NM_030234.2    | WDR76          | -0.275011496 |
| ILMN_2679885 | NM_020042.1    | MOCS1          | -0.275167066 |
| ILMN_1251056 | NM_030145.2    | LSM6           | -0.275279436 |
| ILMN_2837543 | NM_010937.2    | NRAS           | -0.275485539 |
| ILMN_1217978 | NM_010453.2    | HOXA5          | -0.275512112 |
| ILMN_2492786 | AK017777.1     | SCL0004158.1_6 | -0.275718144 |
| ILMN_2645645 | XM_001001311.2 | HNRPA0         | -0.275804585 |
| ILMN_2765024 | XM_132230.3    | SEC31L1        | -0.275811235 |
| ILMN_2657780 | NM_138598.5    | D11WSU99E      | -0.275928495 |
| ILMN_1253336 |                | AI850995       | -0.275970632 |
| ILMN_2744398 | NM_017375.2    | OSTF1          | -0.276113251 |
| ILMN_2695867 | NM_139145.4    | HLCS           | -0.276231743 |
| ILMN_2746830 | NM_177564.4    | BC022224       | -0.276247586 |
| ILMN_2484932 |                | C030002B11RIK  | -0.276320668 |
| ILMN_1249670 | NM_009787.2    | PDIA4          | -0.27637469  |
| ILMN_3160174 | NM_001013372.1 | NRP            | -0.276487152 |
| ILMN_1236742 | XM_914598.2    | ALPK2          | -0.276660154 |
| ILMN_1223353 | NM_010470.1    | HP1BP3         | -0.27670764  |
| ILMN_2965132 | NM_198617.1    | TSPYL3         | -0.276760336 |
| ILMN_1215649 |                | C230075M21RIK  | -0.276863816 |
| ILMN_2710185 | NM_023402.1    | MYLC2B         | -0.276872714 |
| ILMN_1248854 | NM_019987.1    | ICK            | -0.276967011 |
| ILMN_2799667 | NM_027977.1    | 2310001A20RIK  | -0.277064278 |
| ILMN_1215890 | NM_133828.2    | CREB1          | -0.277071251 |
| ILMN_2469329 | NM_011609.3    | TNFRSF1A       | -0.277084877 |
| ILMN_1221340 | NM_011187.1    | PSMB7          | -0.277169803 |
| ILMN_2699477 | NM_030251.2    | ABTB1          | -0.277223294 |
| ILMN_2578592 |                | D130092D14RIK  | -0.27731333  |
| ILMN_2926198 | NM_023516.3    | 2310016C08RIK  | -0.27750926  |
| ILMN_2601525 | NM_173785.2    | A230051G13RIK  | -0.277586505 |
| ILMN_2419490 | NM_009400.2    | TNFRSF18       | -0.278051546 |
| ILMN_1251229 | NM_028195.3    | CYTH4          | -0.278374239 |

|              |                |               |              |
|--------------|----------------|---------------|--------------|
| ILMN_2596851 | NM_010688.4    | LASP1         | -0.278516503 |
| ILMN_2613659 | NM_026295.2    | CTDP1         | -0.278659477 |
| ILMN_2920759 | NM_019765.2    | CLIP1         | -0.278772905 |
| ILMN_1230087 | NM_134013.3    | PSME4         | -0.278986697 |
| ILMN_2659132 | NM_025291.2    | SRA1          | -0.279016022 |
| ILMN_1256175 | NM_183028.3    | PCMTD1        | -0.279285964 |
| ILMN_2796353 | NM_009011.2    | RAD23B        | -0.27939103  |
| ILMN_2754074 | NM_033521.3    | LAPTM4B       | -0.279405158 |
| ILMN_2776391 | NM_019702.2    | HBS1L         | -0.279438031 |
| ILMN_2617478 | NM_133948.4    | PSIP1         | -0.279473301 |
| ILMN_1228485 | NM_009974.2    | CSNK2A2       | -0.279534703 |
| ILMN_2749354 | NM_174997.1    | FAM168B       | -0.279591833 |
| ILMN_2702374 | NM_177167.4    | PPM1E         | -0.279627606 |
| ILMN_1248357 | XM_001477508.1 | LOC100046844  | -0.279851785 |
| ILMN_1226754 | NM_018774.3    | PHC2          | -0.280008463 |
| ILMN_1241414 |                | 4930429A08RIK | -0.280113577 |
| ILMN_3058640 | NM_001037812.1 | ALS2CR4       | -0.280130359 |
| ILMN_2439505 |                | 2900006A08RIK | -0.280189288 |
| ILMN_2461696 | NM_023854.1    | ARFGAP2       | -0.280357698 |
| ILMN_1220121 |                | KIF23         | -0.280374492 |
| ILMN_2974280 | NM_027381.1    | 2510012J08RIK | -0.280715644 |
| ILMN_3163529 | XM_001474445.1 | LOC100045522  | -0.28077351  |
| ILMN_2746681 | NM_001033308.2 | BC013712      | -0.280790297 |
| ILMN_2557918 |                | 1700020I14RIK | -0.280816719 |
| ILMN_2469320 |                | 2610319H10RIK | -0.280910937 |
| ILMN_1228053 | XM_001000361.1 | 1110034G24RIK | -0.280921704 |
| ILMN_3123889 | NM_178845.1    | ZFP277        | -0.281052161 |
| ILMN_2896805 | NM_025894.1    | PSMD12        | -0.281119021 |
| ILMN_1251483 | XR_033257.1    | LOC667582     | -0.281131246 |
| ILMN_2647346 | NM_028758.2    | GGA2          | -0.281258234 |
| ILMN_1219781 | NM_001033440.2 | GM1587        | -0.281499701 |
| ILMN_2567653 |                | SKD3          | -0.281506564 |
| ILMN_1225608 |                | NCOA3         | -0.281525334 |
| ILMN_2790392 | NM_133992.1    | USP52         | -0.281583313 |
| ILMN_3126609 | NM_001039187.1 | CEACAM1       | -0.281628862 |
| ILMN_2812084 | NM_134083.2    | RCBTB2        | -0.281632106 |
| ILMN_2842802 | NM_026062.2    | 2900024C23RIK | -0.281738624 |
| ILMN_2760840 | NM_146154.1    | PPP1R8        | -0.282018297 |
| ILMN_1213982 | NM_027109.1    | DNASE1L1      | -0.282030909 |
| ILMN_1237640 | NM_009919.1    | CNIH          | -0.282105637 |
| ILMN_2842366 | NM_025302.3    | MRPL2         | -0.282559689 |
| ILMN_2666445 | NM_018862.2    | AGPAT1        | -0.282573214 |
| ILMN_1258420 | NM_019796.4    | SYNCRIP       | -0.282738711 |
| ILMN_2665625 | NM_010175.2    | FADD          | -0.282758413 |
| ILMN_2658687 | NM_008521.1    | LTC4S         | -0.282784672 |
| ILMN_1256807 | NM_194340.1    | C330019G07RIK | -0.282822799 |

|              |                |               |              |
|--------------|----------------|---------------|--------------|
| ILMN_2640570 | NM_027470.3    | PAK4          | -0.282886156 |
| ILMN_1221611 | NM_008850.1    | PITPNA        | -0.282920415 |
| ILMN_1248410 | NM_001003934.1 | RTN3          | -0.283069026 |
| ILMN_2596534 | NM_172124.2    | B3GAT2        | -0.283082983 |
| ILMN_1225503 |                | 4833439L19RIK | -0.2830904   |
| ILMN_3060966 | NM_001033449.1 | ALS2CR4       | -0.283254322 |
| ILMN_2626260 | NM_028809.1    | ARPC5L        | -0.283409367 |
| ILMN_1228383 |                | 3230401M21RIK | -0.283783407 |
| ILMN_2610822 | NM_008339.1    | CD79B         | -0.28378415  |
| ILMN_2619107 | NM_008495.1    | LGALS1        | -0.283862634 |
| ILMN_2822239 | NM_027658.1    | HEXIM2        | -0.283914407 |
| ILMN_1224768 | NM_133838.4    | EHD4          | -0.284123315 |
| ILMN_3099398 | NM_001042675.1 | RBPMS         | -0.284349401 |
| ILMN_2688944 | NM_019752.2    | HTRA2         | -0.284378833 |
| ILMN_1236221 | NM_011264.3    | REV3L         | -0.284472761 |
| ILMN_2791952 | NM_019479.2    | HES6          | -0.284579517 |
| ILMN_1237483 | NM_080561.3    | RNF216        | -0.284582369 |
| ILMN_2598703 | NM_010509.1    | IFNAR2        | -0.284693736 |
| ILMN_2435413 | NM_001081453.1 | NIN           | -0.284850391 |
| ILMN_2852904 | NM_024475.3    | UBLCP1        | -0.284932296 |
| ILMN_1218036 | NM_001040026.1 | SCO1          | -0.284965705 |
| ILMN_2732229 | NM_007452.1    | PRDX3         | -0.285074922 |
| ILMN_2527760 | NM_001039939.1 | ASXL1         | -0.28515697  |
| ILMN_2618481 | NM_144958.3    | EIF4A1        | -0.285239789 |
| ILMN_1222637 | NM_009672.2    | ANP32A        | -0.285282922 |
| ILMN_2481799 | NM_172918.3    | ZFP317        | -0.28544976  |
| ILMN_2572010 |                | SAS           | -0.285517349 |
| ILMN_2897230 | NM_009284.2    | STAT6         | -0.285680748 |
| ILMN_1254374 | NM_019757.1    | FZR1          | -0.285881446 |
| ILMN_1220875 | NM_008020.2    | FKBP2         | -0.285916547 |
| ILMN_2787310 | NM_029231.2    | PELP1         | -0.286060395 |
| ILMN_2672208 | NM_020000.2    | MED8          | -0.286119216 |
| ILMN_2684759 | NM_138604.2    | OTUD5         | -0.286601991 |
| ILMN_1245446 |                | 5730405I09RIK | -0.286630992 |
| ILMN_2762514 | NM_027422.1    | 2700087H15RIK | -0.286918312 |
| ILMN_1239385 | NM_153586.1    | RBM41         | -0.28698629  |
| ILMN_2512043 | XM_001477380.1 | LOC100047012  | -0.28717674  |
| ILMN_2697057 | XM_001479162.1 | LOC100047603  | -0.287227538 |
| ILMN_1219942 | NM_007997.1    | FDXR          | -0.287279484 |
| ILMN_1225045 | NM_029843.2    | 1700109H08RIK | -0.287359108 |
| ILMN_1227707 |                | NEK8          | -0.287403211 |
| ILMN_2725807 | NM_029404.2    | PHF14         | -0.2874106   |
| ILMN_1231849 |                | SPNR          | -0.287491019 |
| ILMN_2665805 | NM_011995.3    | PCLO          | -0.287795261 |
| ILMN_2644845 | NM_175113.3    | TRMT6         | -0.287982148 |
| ILMN_2935012 | NM_013471.1    | ANXA4         | -0.288020503 |



|              |                |               |              |
|--------------|----------------|---------------|--------------|
| ILMN_2776952 | NM_001033271.3 | TMEM55B       | -0.288300766 |
| ILMN_1257623 | NM_031376.2    | PIK3AP1       | -0.288314443 |
| ILMN_2720356 | XM_159702.3    | ARHGEF11      | -0.288335084 |
| ILMN_1237950 | NM_012047.1    | BRD7          | -0.28836328  |
| ILMN_2680543 | NM_011829.2    | IMPDH1        | -0.288389177 |
| ILMN_1224534 | NM_025644.3    | EXOSC1        | -0.288401366 |
| ILMN_1231586 | NM_021372.2    | SERTAD2       | -0.288538529 |
| ILMN_1220100 | NM_009536.3    | YWHAE         | -0.288677756 |
| ILMN_2652719 | NM_016933.3    | PTPRCAP       | -0.288773918 |
| ILMN_1212991 |                | 3110023E09RIK | -0.28892164  |
| ILMN_1232593 | NM_197993.2    | TUT1          | -0.288997878 |
| ILMN_1233929 |                | PSMF1         | -0.28906482  |
| ILMN_2591031 | NM_022018.2    | FAM129A       | -0.289099931 |
| ILMN_2877443 | NM_018811.4    | ABHD2         | -0.28940934  |
| ILMN_2697954 | NM_177224.1    | CHD9          | -0.289423071 |
| ILMN_2650751 | NM_019781.2    | PEX14         | -0.289426733 |
| ILMN_2625520 | NM_008297.2    | HSF2          | -0.289428342 |
| ILMN_2594872 | NM_028726.1    | 4632404H12RIK | -0.289428667 |
| ILMN_2468405 |                | 5630401D06RIK | -0.289452362 |
| ILMN_2839886 | NM_010753.2    | MXD4          | -0.289676027 |
| ILMN_2551852 |                | C330049H01RIK | -0.289735452 |
| ILMN_2853342 | NM_011862.1    | PACSIN2       | -0.289794789 |
| ILMN_2450215 | NM_023854.1    | ARFGAP2       | -0.289849777 |
| ILMN_2766455 | NM_178701.2    | LRRC8D        | -0.290056822 |
| ILMN_2748181 | NM_009991.2    | CYP11B2       | -0.290261198 |
| ILMN_2597013 | NM_027827.2    | AFMID         | -0.290331861 |
| ILMN_2680066 | NM_009087.1    | POLR1D        | -0.290424816 |
| ILMN_1247242 | NM_025441.2    | SDCCAG1       | -0.290717752 |
| ILMN_3160745 | NM_027830.2    | MCM9          | -0.290744164 |
| ILMN_2624574 | NM_199032.2    | CEP135        | -0.290830217 |
| ILMN_2679477 | NM_027891.3    | 1200011O22RIK | -0.290957145 |
| ILMN_1222246 | NM_007408.3    | ADFP          | -0.291200438 |
| ILMN_1228253 | NM_175101.3    | TMEM111       | -0.291319901 |
| ILMN_2592861 | NM_001013381.1 | RSAD1         | -0.291322098 |
| ILMN_1242802 | NM_024287.3    | RAB6          | -0.291536448 |
| ILMN_1257340 | NM_012047.1    | BRD7          | -0.291541954 |
| ILMN_3134598 | NM_001024606.1 | 4833426J09RIK | -0.291587725 |
| ILMN_2711948 | XR_033736.1    | LOC100047619  | -0.291600028 |
| ILMN_1213495 | NM_022030.3    | SV2A          | -0.291768049 |
| ILMN_1238789 | NM_016886.2    | GRIA3         | -0.292061067 |
| ILMN_1221859 | NM_026365.2    | JAGN1         | -0.292259085 |
| ILMN_1242577 | XM_987550.1    | LOC671523     | -0.292316839 |
| ILMN_1222313 | NM_175655.1    | HIST1H4F      | -0.29239987  |
| ILMN_1217913 | XM_980391.1    | D230007K08RIK | -0.292412887 |
| ILMN_2464736 |                | B230205O20RIK | -0.292537749 |
| ILMN_2964728 | NM_175471.2    | 2810410C14RIK | -0.292584326 |

|              |                |                  |              |
|--------------|----------------|------------------|--------------|
| ILMN_1214150 | NM_001038637.1 | GNG2             | -0.292640442 |
| ILMN_2623712 | NM_009353.2    | TERF2            | -0.292670496 |
| ILMN_2834677 | NM_145940.2    | WIPI1            | -0.292707257 |
| ILMN_1241482 | XM_001473184.1 | LOC100039607     | -0.292844111 |
| ILMN_1222543 | NM_201641.2    | UGT1A10          | -0.292928719 |
| ILMN_2850402 | NM_021555.1    | BRP16            | -0.292975051 |
| ILMN_2923864 | NM_009811.2    | CASP6            | -0.293017585 |
| ILMN_1233424 |                | LBCL1            | -0.293088667 |
| ILMN_2911760 | NM_133835.1    | UBAC1            | -0.293243217 |
| ILMN_1214057 | NM_178616.3    | PSMD11           | -0.293245857 |
| ILMN_1243810 | NM_207633.2    | YIPF6            | -0.293320893 |
| ILMN_2681516 | NM_139143.2    | SLC39A6          | -0.293559029 |
| ILMN_1239177 | XM_001474709.1 | LOC100045644     | -0.293592277 |
| ILMN_2533054 | XM_124858.2    | LOC232887        | -0.293685278 |
| ILMN_2687032 | NM_133765.2    | FBXO31           | -0.293925552 |
| ILMN_2648080 | NM_001042421.1 | KNTC1            | -0.294228105 |
| ILMN_2730005 | NM_009082.2    | RPL29            | -0.294326878 |
| ILMN_2671366 | NM_026377.1    | 6330577E15RIK    | -0.294433838 |
| ILMN_2534259 | XM_111221.4    | LOC237877        | -0.294457262 |
| ILMN_1226546 |                | C79267           | -0.294586495 |
| ILMN_2652042 |                | RAD18            | -0.294603073 |
| ILMN_2427909 | NM_001035240.2 | TRPM3            | -0.294651853 |
| ILMN_1235012 |                | 9430032P18RIK    | -0.294824658 |
| ILMN_2892507 | NM_010242.2    | FUT4             | -0.295098184 |
| ILMN_2732465 | NM_025282.2    | MEF2C            | -0.295120608 |
| ILMN_1237631 | NM_053117.2    | PARD6G           | -0.295228587 |
| ILMN_1260569 | XM_907664.2    | 1810013L24RIK    | -0.295271602 |
| ILMN_2829295 | NM_020560.1    | MRPS31           | -0.295569271 |
| ILMN_2900557 | NM_010620.1    | KIF15            | -0.295745339 |
| ILMN_1221458 | NM_029074.2    | TMEM188          | -0.295936052 |
| ILMN_1222594 | NM_028137.2    | 5730528L13RIK    | -0.296170532 |
| ILMN_3100258 | NM_199226.1    | THEG             | -0.29647726  |
| ILMN_2685390 | NM_009745.1    | BCL7B            | -0.296500249 |
| ILMN_1239137 |                | 2210410D02RIK    | -0.296661768 |
| ILMN_2984647 | NM_007456.1    | AP1M1            | -0.296786985 |
| ILMN_2719620 | NM_021549.2    | PNKP             | -0.29695413  |
| ILMN_3149112 | NM_011794.3    | BPNT1            | -0.296991361 |
| ILMN_2496664 | NM_012017.2    | ZFP346           | -0.297129077 |
| ILMN_2439130 | NM_172120.2    | VPS41            | -0.297245742 |
| ILMN_2596259 | NM_025542.2    | 2410001C21RIK    | -0.297355416 |
| ILMN_1234589 | NM_146141.1    | PPA2             | -0.297370204 |
| ILMN_2961091 | NM_023596.3    | SLC29A3          | -0.297466339 |
| ILMN_1245424 | XM_001002886.2 | PPAT             | -0.297473777 |
| ILMN_1213136 | NM_138606.1    | PIM2             | -0.297571942 |
| ILMN_2420939 | AK087461.1     | SCL0002624.1_576 | -0.297590773 |
| ILMN_2592571 | NM_138664.2    | DNAJC28          | -0.297712013 |

|              |                |               |              |
|--------------|----------------|---------------|--------------|
| ILMN_1222004 |                | RBBP9         | -0.297765694 |
| ILMN_2665870 | NM_028136.1    | DHX36         | -0.297887308 |
| ILMN_1257300 | NM_026504.2    | COQ5          | -0.297954329 |
| ILMN_3007956 | NM_028986.1    | GZF1          | -0.298118675 |
| ILMN_2987369 | NM_029402.1    | CUL2          | -0.298164667 |
| ILMN_2711045 | NM_178848.3    | SIRT5         | -0.298247605 |
| ILMN_2659540 | NM_010901.2    | NFATC3        | -0.298297453 |
| ILMN_2705846 | NM_145823.2    | PITPNC1       | -0.298371963 |
| ILMN_2857581 | NM_181406.2    | RARS2         | -0.298664684 |
| ILMN_2614895 | NM_030250.1    | NUS1          | -0.298758024 |
| ILMN_2707510 | NM_007489.3    | ARNTL         | -0.298810848 |
| ILMN_2706232 | NM_009304.1    | SYNGR2        | -0.298817968 |
| ILMN_2545953 | NM_009479.2    | UROS          | -0.298980251 |
| ILMN_1240038 | NM_177673.2    | BC046331      | -0.299154652 |
| ILMN_2728021 | NM_172946.1    | KRT222        | -0.299241424 |
| ILMN_1239801 | XM_001002526.2 | IRF2BP2       | -0.299369956 |
| ILMN_1259379 | NM_028303.3    | PDZD11        | -0.299605617 |
| ILMN_2987564 | NM_175212.4    | TMEM65        | -0.299659146 |
| ILMN_2625626 | NM_001081179.1 | HEATR5B       | -0.29970985  |
| ILMN_1237895 | NM_027236.2    | EIF1AD        | -0.299762328 |
| ILMN_1246758 | NM_177614.2    | OS9           | -0.299805341 |
| ILMN_3079421 | NM_008801.2    | PDE6D         | -0.299842674 |
| ILMN_2837865 | NM_026309.1    | LSM3          | -0.299878055 |
| ILMN_2474684 |                | B230107K20RIK | -0.299883293 |
| ILMN_1257463 |                | BCL11A        | -0.299968511 |
| ILMN_2434235 | NM_144825.2    | TAOK1         | -0.30011398  |
| ILMN_1238955 | XM_973520.1    | EXOC1         | -0.300126198 |
| ILMN_1236459 | NM_153783.4    | PAOX          | -0.300170716 |
| ILMN_1219446 | NM_198005.1    | 4833418A01RIK | -0.300310015 |
| ILMN_2670542 | NM_133768.1    | ASL           | -0.300480014 |
| ILMN_1235669 | NM_026171.1    | NVL           | -0.300786789 |
| ILMN_1242472 | NM_020606.5    | PARVA         | -0.300817062 |
| ILMN_2607765 | NM_175002.1    | BC025076      | -0.300886767 |
| ILMN_2770894 |                | MAP3K6        | -0.300916677 |
| ILMN_1223834 | NM_009909.3    | IL8RB         | -0.300958036 |
| ILMN_2984872 | NM_009389.1    | TLE3          | -0.301033319 |
| ILMN_2683326 | NM_144886.2    | EXOSC2        | -0.301215852 |
| ILMN_2472110 | NM_025387.2    | TMEM14C       | -0.301299951 |
| ILMN_2471858 | NM_026048.3    | 2810452K22RIK | -0.301527324 |
| ILMN_1252063 | NM_009860.2    | CDC25C        | -0.301770011 |
| ILMN_2575994 |                | A730094H17RIK | -0.30179318  |
| ILMN_2807229 | NM_026681.4    | CCDC88C       | -0.301963022 |
| ILMN_2770819 |                | RNF10         | -0.302048424 |
| ILMN_2977762 | NM_177296.4    | TNPO3         | -0.302064492 |
| ILMN_2441899 | NM_021288.2    | TYMS          | -0.302253988 |
| ILMN_1255684 | NM_011334.2    | CLCN4-2       | -0.302403557 |

|              |                |                     |              |
|--------------|----------------|---------------------|--------------|
| ILMN_1240030 |                | NFATC3              | -0.302414861 |
| ILMN_2607066 | NM_028295.1    | PDIA5               | -0.302435676 |
| ILMN_1215134 | NM_198647.1    | TBC1D22B            | -0.302847124 |
| ILMN_1223496 | XM_001475823.1 | LOC100046025        | -0.302911327 |
| ILMN_2777722 |                | JARID1B             | -0.302919887 |
| ILMN_1224339 | NM_198295.2    | TXNDC10             | -0.302931491 |
| ILMN_1215903 | NM_007457.2    | AP1S1               | -0.302931853 |
| ILMN_1250698 |                | A430034D21RIK       | -0.302984546 |
| ILMN_1244161 | NM_019731.1    | NME4                | -0.302987248 |
| ILMN_1222118 | XM_129509.9    | CEP350              | -0.30312446  |
| ILMN_1226902 |                | SRRP86              | -0.303441791 |
| ILMN_2719834 | NM_146014.2    | CCM2                | -0.303523099 |
| ILMN_2806880 | NM_175364.2    | LYRM2               | -0.303532644 |
| ILMN_2427368 |                | IGHV10S3_AF064446_I | -0.303570303 |
| ILMN_3162570 | NM_001004164.2 | GNPTAB              | -0.303797906 |
| ILMN_2565835 |                | B930008G03RIK       | -0.303850966 |
| ILMN_2635801 | NM_025636.3    | 2310079N02RIK       | -0.304039024 |
| ILMN_2745240 | NM_029826.2    | HDHD2               | -0.304120449 |
| ILMN_1212648 | NM_172877.2    | 4732496O08RIK       | -0.304156772 |
| ILMN_1249683 |                | D130027A21RIK       | -0.304167203 |
| ILMN_1243228 | NM_134103.1    | IL1RAP              | -0.30426613  |
| ILMN_2679464 | NM_027290.2    | MCM10               | -0.304402849 |
| ILMN_2634248 | NM_019666.2    | SYNCRIP             | -0.304654993 |
| ILMN_2711329 | NM_175430.4    | CCDC40              | -0.304767836 |
| ILMN_3102072 | NM_175229.3    | SRRM2               | -0.304872941 |
| ILMN_1223140 | NM_175317.2    | EFTUD1              | -0.304875812 |
| ILMN_2893417 | NM_009238.2    | SOX4                | -0.304976871 |
| ILMN_2474052 |                | 5830411I20          | -0.305039464 |
| ILMN_2849680 | NM_025387.1    | TMEM14C             | -0.305095684 |
| ILMN_1228572 | NM_030084.3    | GPR108              | -0.305136249 |
| ILMN_1238762 | XR_001789.2    | EG665806            | -0.305428087 |
| ILMN_1259162 | NM_009424.2    | TRAF6               | -0.305463669 |
| ILMN_1260383 | NM_001081392.1 | MDN1                | -0.305480018 |
| ILMN_1252602 | XM_001480443.1 | LOC100048622        | -0.305588419 |
| ILMN_1218250 | NM_178610.3    | KRR1                | -0.305696076 |
| ILMN_2494421 |                | SCL0002791.1_134    | -0.305774931 |
| ILMN_2443482 | NM_011672.3    | UFD1L               | -0.305852132 |
| ILMN_2914714 | NM_019457.1    | LRRC6               | -0.305972488 |
| ILMN_2465905 |                | 2310007O11RIK       | -0.30600106  |
| ILMN_1222022 | NM_010629.2    | KIFAP3              | -0.306007597 |
| ILMN_3152241 | NM_134038.2    | SLC16A6             | -0.306103115 |
| ILMN_2795078 | NM_019449.1    | UNC93B1             | -0.30616186  |
| ILMN_2659616 | NM_009007.2    | RAC1                | -0.306170293 |
| ILMN_1253039 | NM_001013389.1 | MRS2                | -0.30627964  |
| ILMN_2684279 | NM_145537.1    | EDEM2               | -0.306577136 |
| ILMN_1245008 |                | GIN1                | -0.306579821 |

|              |                |               |                     |
|--------------|----------------|---------------|---------------------|
| ILMN_2735996 | NM_011032.2    | P4HB          | -0.306693575        |
| ILMN_2486231 | XR_031635.1    | LOC677216     | -0.306726564        |
| ILMN_2854004 | NM_011461.2    | SPIC          | -0.306743452        |
| ILMN_2857580 | NM_181406.2    | RARS2         | -0.307047702        |
| ILMN_1222682 | NM_133716.2    | SMAP2         | -0.307086898        |
| ILMN_1252320 | NM_133346.2    | ASB6          | -0.307293967        |
| ILMN_2972026 | NM_009884.2    | CEBPG         | -0.307306056        |
| ILMN_1238081 | NM_011014.2    | OPRS1         | -0.307347082        |
| ILMN_2739039 | NM_009974.2    | CSNK2A2       | -0.307606418        |
| ILMN_1258115 | XM_284541.1    | LRRFIP2       | -0.307651478        |
| ILMN_2516654 | NM_175550.3    | AP4E1         | -0.307810357        |
| ILMN_1247989 | NM_053266.1    | GTF2IRD2      | -0.307965465        |
| ILMN_2659950 |                | ECHDC1        | -0.307993376        |
| ILMN_2892479 | NM_172639.1    | 5330431N19RIK | -0.308063705        |
| ILMN_1229004 | XM_207052.2    | LOC279899     | -0.308167724        |
| ILMN_2735294 | NM_026672.2    | GSTM7         | -0.308212116        |
| ILMN_2773909 | NM_028166.3    | 1600014C10RIK | -0.308394705        |
| ILMN_2745540 | NM_011135.4    | CNOT7         | -0.308590262        |
| ILMN_2745522 | NM_133790.1    | R74862        | -0.308659115        |
| ILMN_2862538 | NM_007730.2    | COL12A1       | -0.308919943        |
| ILMN_1224614 | NM_053183.2    | DDX50         | -0.309185619        |
| ILMN_2458030 | NM_013507.3    | EIF4G2        | -0.309301752        |
| ILMN_2706231 | NM_009304.1    | SYNGR2        | -0.309427067        |
| ILMN_2706430 | NM_010559.2    | IL6RA         | -0.309581915        |
| ILMN_2660663 | NM_016895.3    | AK2           | -0.309732495        |
| ILMN_2661733 | NM_008212.1    | HADHSC        | -0.309812181        |
| ILMN_2722033 | XM_910826.2    | BTBD2         | -0.310065863        |
| ILMN_1252149 |                |               | 6.03E+24 -0.3102316 |
| ILMN_3120652 | NM_133716.2    | SMAP2         | -0.310535894        |
| ILMN_2639642 | NM_152801.1    | ARHGEF6       | -0.310585326        |
| ILMN_2681824 | NM_080428.2    | FBXW7         | -0.310869161        |
| ILMN_1253864 | NM_020594.2    | ZC3H8         | -0.310883215        |
| ILMN_3007728 | NM_172757.3    | HEATR3        | -0.310943886        |
| ILMN_2750905 |                | LRRIQ2        | -0.311009829        |
| ILMN_2906430 | NM_017480.1    | ICOS          | -0.311179958        |
| ILMN_2680686 | NM_145477.1    | ALG12         | -0.311379185        |
| ILMN_1242900 | NM_026040.2    | SRFBP1        | -0.311488081        |
| ILMN_1223384 | NM_030221.1    | NADSYN1       | -0.311764943        |
| ILMN_1253181 | XM_486849.5    | EG434907      | -0.311787533        |
| ILMN_1241640 |                | POSH-PENDING  | -0.311819067        |
| ILMN_2654074 | NM_001013370.1 | SESN1         | -0.311853513        |
| ILMN_1249838 |                | 3830408P04RIK | -0.312009498        |
| ILMN_2685525 | XM_126016.2    | 4930529M09RIK | -0.312187074        |
| ILMN_1245455 | XM_194337.7    | MEGF8         | -0.312191928        |
| ILMN_1217302 | NM_009211.2    | SMARCC1       | -0.312213797        |
| ILMN_1225324 | NM_010945.1    | NSMAF         | -0.312218615        |

|              |                |               |              |
|--------------|----------------|---------------|--------------|
| ILMN_2533300 | XM_134575.5    | LOC380626     | -0.312234995 |
| ILMN_2778872 | NM_019499.2    | MAD2L1        | -0.312240844 |
| ILMN_3006611 | NM_011945.2    | MAP3K1        | -0.312270972 |
| ILMN_2548916 |                | 4930438D12RIK | -0.312360257 |
| ILMN_2612091 |                | 2610034E13RIK | -0.312379942 |
| ILMN_2739843 |                | METRN         | -0.312586423 |
| ILMN_1253556 |                | A930015D01RIK | -0.312652144 |
| ILMN_2590860 | NM_011294.2    | RPO2TC1       | -0.312832551 |
| ILMN_2587980 | XM_358773.1    | D16BWG1494E   | -0.312836684 |
| ILMN_1219946 | NM_008348.2    | IL10RA        | -0.312994089 |
| ILMN_1241302 | NM_007782.1    | CSF3R         | -0.313185867 |
| ILMN_2675681 | XM_001477288.1 | LOC100047052  | -0.313883076 |
| ILMN_1228544 | NM_020579.1    | B4GALT3       | -0.313984124 |
| ILMN_1225938 |                | AW112037      | -0.31408234  |
| ILMN_2804622 | NM_029365.1    | MED25         | -0.31412987  |
| ILMN_2684300 | NM_026549.3    | PDCD2L        | -0.314165714 |
| ILMN_1226584 | NM_030139.3    | ZFP449        | -0.314172259 |
| ILMN_2993944 | NM_001037918.1 | EG623661      | -0.314502067 |
| ILMN_2822915 | NM_172827.1    | LNPEP         | -0.314515261 |
| ILMN_1219304 | NM_001012638.1 | ACD           | -0.314879755 |
| ILMN_1227463 | XM_001478963.1 | LOC100047834  | -0.314972498 |
| ILMN_1234387 |                | ACP1          | -0.31500292  |
| ILMN_2598852 | NM_011239.2    | RANBP1        | -0.315053526 |
| ILMN_1247996 | XM_001005723.1 | LOC673501     | -0.315318079 |
| ILMN_1235623 | NM_144881.3    | HHAT          | -0.315391457 |
| ILMN_1214974 | NM_010744.1    | IL1RL1L       | -0.315492763 |
| ILMN_1237114 | NM_177260.2    | TMEM154       | -0.315735204 |
| ILMN_2630710 | NM_030199.3    | ZFP623        | -0.3157488   |
| ILMN_1215416 | XM_207385.3    | C130035G06RIK | -0.315802107 |
| ILMN_1221445 | XM_131720.2    | 2610002D18RIK | -0.315864988 |
| ILMN_3154111 | NM_029204.1    | RNASSET2      | -0.316328239 |
| ILMN_1242705 |                | 4833420G17RIK | -0.316345305 |
| ILMN_1218118 |                | TIA1          | -0.316398551 |
| ILMN_2525289 | XM_914864.3    | C330018D20RIK | -0.316407707 |
| ILMN_2887131 | NM_144937.2    | USP3          | -0.316449076 |
| ILMN_1237927 |                | 8430407G10RIK | -0.316464209 |
| ILMN_2700533 | NM_011235.3    | RAD51L3       | -0.316735956 |
| ILMN_3082808 | NM_001007578.1 | ARMCX6        | -0.317024473 |
| ILMN_1213604 | NM_007486.3    | ARHGDIB       | -0.317230462 |
| ILMN_1244773 | NM_001037279.1 | 2700094K13RIK | -0.317263774 |
| ILMN_1250346 | NM_009986.3    | CUX1          | -0.317350577 |
| ILMN_2605031 | NM_177133.2    | E330018D03RIK | -0.317533516 |
| ILMN_1254605 | NM_011604.1    | TLR6          | -0.317732544 |
| ILMN_2898944 | NM_025657.2    | LRRC57        | -0.31787387  |
| ILMN_2796429 | NM_133948.2    | PSIP1         | -0.318011534 |
| ILMN_2838372 | NM_028079.1    | 2010111I01RIK | -0.318099406 |

|              |                |                    |              |
|--------------|----------------|--------------------|--------------|
| ILMN_1221874 | XR_031556.1    | LOC244710          | -0.318165908 |
| ILMN_2707623 | NM_027151.1    | DCTN2              | -0.318433894 |
| ILMN_1237207 |                | SYNC               | -0.318550373 |
| ILMN_1213382 |                | SKZ1-PENDING       | -0.318579035 |
| ILMN_2601118 | NM_145427.1    | ATPAF2             | -0.318711465 |
| ILMN_2939367 | NM_175751.3    | ZFP608             | -0.318759513 |
| ILMN_1238113 |                | C030034I22RIK      | -0.318966988 |
| ILMN_1259724 |                | MAN1B              | -0.319165531 |
| ILMN_2580917 |                | ABCD3              | -0.319178196 |
| ILMN_1241054 | NM_001039045.1 | PIGC               | -0.319244397 |
| ILMN_1244214 | NM_026341.2    | NUDT13             | -0.319285096 |
| ILMN_1250704 | NM_178593.3    | RCSD1              | -0.319370599 |
| ILMN_1233220 |                | 1110038G02RIK      | -0.319372919 |
| ILMN_1224653 | XR_032194.1    | LOC432730          | -0.31951736  |
| ILMN_2771109 | NM_001100464.1 | ABPB               | -0.319587298 |
| ILMN_2699700 | NM_019767.2    | ARPC1A             | -0.319660392 |
| ILMN_1213186 |                | 4432404P07RIK      | -0.319701842 |
| ILMN_1235439 | NM_001003918.2 | USP7               | -0.319733002 |
| ILMN_2861051 | NM_207535.1    | MRGPRA7            | -0.319869201 |
| ILMN_2484838 | NM_026861.2    | UBAC2              | -0.31988307  |
| ILMN_2675922 | XM_908180.3    | 2310047A01RIK      | -0.319905711 |
| ILMN_2599544 | NM_027472.2    | 5730455P16RIK      | -0.320063739 |
| ILMN_2476795 | XM_994391.2    | A930035D04RIK      | -0.320198857 |
| ILMN_2979639 | NM_010388.2    | H2-DMB2            | -0.320209415 |
| ILMN_1229532 |                | 2310079N02RIK      | -0.320327218 |
| ILMN_2498763 | NM_012039.1    | ZW10               | -0.320372255 |
| ILMN_1224540 | NM_133222.2    | ELTD1              | -0.320794371 |
| ILMN_1220676 | NM_145990.3    | CDK5RAP2           | -0.320833272 |
| ILMN_2718681 | XM_001473166.1 | ARFGEF1            | -0.321250748 |
| ILMN_2678521 | NM_030258.2    | GPR146             | -0.321307618 |
| ILMN_2950441 | NM_013676.1    | SUPT5H             | -0.321546246 |
| ILMN_1232627 | NM_178745.3    | 6330442E10RIK      | -0.32167654  |
| ILMN_2815594 | NM_019833.1    | B230317C12RIK      | -0.321985869 |
| ILMN_2847773 | NM_001045540.1 | OTTMUSG0000000552: | -0.322076207 |
| ILMN_2462762 | NM_018765.1    | WBP4               | -0.322210735 |
| ILMN_1250019 | NM_019737.1    | B4GALT6            | -0.322224712 |
| ILMN_1250882 | NM_024471.4    | LIAS               | -0.322270015 |
| ILMN_2751194 | NM_199079.1    | DDX17              | -0.322397158 |
| ILMN_1254131 | NM_010301.3    | GNA11              | -0.322480621 |
| ILMN_1215768 | NM_024182.4    | RIOK3              | -0.322557138 |
| ILMN_2665597 | NM_026944.1    | ALKBH3             | -0.322744595 |
| ILMN_2774825 | NM_013716.2    | G3BP1              | -0.322768014 |
| ILMN_2750377 | NM_001030014.2 | MCAT               | -0.322821033 |
| ILMN_1216440 |                | GNE                | -0.322880856 |
| ILMN_2663291 | NM_153390.1    | PXT1               | -0.323150727 |
| ILMN_2590366 | NM_023670.2    | IGF2BP3            | -0.32354152  |

|              |                |               |              |
|--------------|----------------|---------------|--------------|
| ILMN_1218425 | NM_177342.3    | TAF5          | -0.323556947 |
| ILMN_3080410 | NM_207633.2    | YIPF6         | -0.323667428 |
| ILMN_2856144 | NM_023858.1    | MTMR2         | -0.323851738 |
| ILMN_3058391 | NM_172413.2    | RAP2C         | -0.324161208 |
| ILMN_1241196 | NM_026168.3    | ERGIC2        | -0.324225046 |
| ILMN_2700532 | NM_011235.2    | RAD51L3       | -0.324261814 |
| ILMN_2702575 | NM_175360.2    | OBFC1         | -0.324389271 |
| ILMN_1216036 | NM_053186.2    | CNNM3         | -0.324481214 |
| ILMN_1229092 |                | SLC20A2       | -0.324599653 |
| ILMN_1240806 | XM_981204.1    | MYO9A         | -0.324866694 |
| ILMN_1255530 | NM_029553.2    | TTC8          | -0.324886911 |
| ILMN_1224353 | XM_981869.1    | RCC2          | -0.324902267 |
| ILMN_1232028 |                | ITGA4         | -0.324918287 |
| ILMN_2782634 | NM_177025.3    | COBLL1        | -0.324975991 |
| ILMN_1226367 | NM_175266.4    | EPM2AIP1      | -0.325274522 |
| ILMN_2500855 |                | 4732423E21RIK | -0.325387683 |
| ILMN_2766942 | XM_143616.3    | C430017H16RIK | -0.325418204 |
| ILMN_1245314 | XM_001473937.1 | LOC100045254  | -0.32545474  |
| ILMN_1226325 | NM_033569.2    | CNNM2         | -0.325507346 |
| ILMN_2820369 | NM_026231.2    | GSTCD         | -0.325514656 |
| ILMN_1235616 | NM_028776.3    | 1200016D23RIK | -0.32600357  |
| ILMN_2933624 | NR_002885.1    | LOC654467     | -0.326011038 |
| ILMN_2926068 | NM_175563.3    | PRR11         | -0.326015949 |
| ILMN_2552380 |                | 4930465J06RIK | -0.326115717 |
| ILMN_2767487 | NM_013556.2    | HPRT1         | -0.326250573 |
| ILMN_1226642 | NM_025617.2    | 2210012G02RIK | -0.326340561 |
| ILMN_2690620 | NM_133234.1    | BBC3          | -0.326380197 |
| ILMN_2658914 | NM_199028.1    | AK122525      | -0.326573029 |
| ILMN_1222803 | NM_010481.1    | HSPA9         | -0.326827025 |
| ILMN_1249694 | NM_028352.3    | PGM3          | -0.327218897 |
| ILMN_1229830 |                | ZFHX1B        | -0.327373448 |
| ILMN_1227815 |                | IDH3A         | -0.327682743 |
| ILMN_1228373 | XM_139484.2    | LOC239416     | -0.327737126 |
| ILMN_2986172 | NM_026539.1    | CHD1L         | -0.327747461 |
| ILMN_1217896 |                | C230084O18RIK | -0.327777138 |
| ILMN_2787785 | NM_001045514.1 | AKNA          | -0.327826377 |
| ILMN_2957113 | NM_133658.1    | ERCC3         | -0.327843412 |
| ILMN_1249601 |                | D930024N12RIK | -0.328009136 |
| ILMN_2688728 | NM_009981.3    | PCYT1A        | -0.328279352 |
| ILMN_2696247 | NM_011790.4    | ARIH2         | -0.32828076  |
| ILMN_1237504 | XM_989242.1    | ZFP508        | -0.328438346 |
| ILMN_3073044 | NM_026447.2    | PPM1M         | -0.328451567 |
| ILMN_2594873 | NM_028726.1    | 4632404H12RIK | -0.328520194 |
| ILMN_2674890 | NM_020601.2    | TBL1X         | -0.328611537 |
| ILMN_2575376 | NM_029337.2    | EP400         | -0.328653519 |
| ILMN_2614540 | NM_011972.1    | POLI          | -0.328757786 |



|              |                |               |              |
|--------------|----------------|---------------|--------------|
| ILMN_2880346 | NM_028244.1    | RRP1B         | -0.328842083 |
| ILMN_2661422 | NM_019444.2    | RAMP2         | -0.328924711 |
| ILMN_2949869 | NM_009376.1    | IFT88         | -0.328933566 |
| ILMN_3131766 | NM_011637.6    | TREX1         | -0.329086111 |
| ILMN_2506012 | NM_021897.1    | TRP53INP1     | -0.329133776 |
| ILMN_2723338 | NM_020329.3    | DOLPP1        | -0.32922313  |
| ILMN_2585233 |                | SELPL         | -0.329265144 |
| ILMN_2705078 | NM_139117.2    | CSDA          | -0.329466152 |
| ILMN_2760548 | NM_183019.2    | ARHGEF4       | -0.330147751 |
| ILMN_2617496 | NM_025900.1    | DEK           | -0.330319438 |
| ILMN_2605872 | NM_011603.4    | TBPL1         | -0.330340216 |
| ILMN_1234929 | XM_001473421.1 | LOC100044968  | -0.330403694 |
| ILMN_1243798 |                | 9030203C11RIK | -0.330412088 |
| ILMN_2479611 | NM_013910.2    | FBXL10        | -0.330471271 |
| ILMN_2752327 | NM_145962.2    | PANK3         | -0.330930632 |
| ILMN_1229418 | NM_080634.3    | HPS3          | -0.330939594 |
| ILMN_3162754 | NM_023637.1    | SARS2         | -0.330955523 |
| ILMN_1217296 | NM_012003.1    | COPS7A        | -0.331009587 |
| ILMN_2585533 |                | LY78          | -0.331050727 |
| ILMN_1239230 | NM_011496.1    | AURKB         | -0.331206047 |
| ILMN_1256817 | NM_011414.2    | SLPI          | -0.331285515 |
| ILMN_1240431 |                | EPHB2         | -0.331348021 |
| ILMN_1250410 | NM_011163.3    | EIF2AK2       | -0.331400823 |
| ILMN_1215969 | NM_198023.2    | RCOR1         | -0.331478507 |
| ILMN_2505392 |                | 4921513D23RIK | -0.331510774 |
| ILMN_1244491 |                | LY108         | -0.331553087 |
| ILMN_1222389 | NM_028748.2    | PAQR5         | -0.331838928 |
| ILMN_1225466 | XM_001479914.1 | 1700022N22RIK | -0.331865398 |
| ILMN_2675535 | NM_009796.2    | CAPN7         | -0.331885417 |
| ILMN_2857204 | NM_172683.1    | POGZ          | -0.331982027 |
| ILMN_2742928 | NM_008761.2    | FXDY5         | -0.331989483 |
| ILMN_1245079 | NM_007421.1    | ADSSL1        | -0.332006179 |
| ILMN_1248254 | NM_138591.1    | GFM1          | -0.332138348 |
| ILMN_1232159 | XM_125854.4    | AMDHD1        | -0.3321833   |
| ILMN_2424605 | NM_013711.1    | TXNRD2        | -0.332657427 |
| ILMN_2743668 | NM_024471.4    | LIAS          | -0.332754606 |
| ILMN_2769772 | NM_178149.4    | PIK3IP1       | -0.332858236 |
| ILMN_2707291 | NM_001081355.1 | PRDM2         | -0.333056063 |
| ILMN_2828916 | NM_028127.3    | FRMD6         | -0.33305727  |
| ILMN_2763459 | NM_173038.3    | TBCEL         | -0.333124301 |
| ILMN_1238179 | NM_027184.1    | IPMK          | -0.333151051 |
| ILMN_2703082 | NM_201637.2    | CHD8          | -0.333230451 |
| ILMN_1246976 | NM_010716.2    | LIG3          | -0.333325502 |
| ILMN_1224430 | NM_016791.3    | NFATC1        | -0.333367912 |
| ILMN_2743723 | NM_011202.2    | PTPN11        | -0.333405842 |
| ILMN_2693679 | NM_183115.3    | CCDC125       | -0.333429658 |

|              |                |               |              |
|--------------|----------------|---------------|--------------|
| ILMN_2700408 | NM_011844.3    | MGLL          | -0.333445912 |
| ILMN_1243193 |                | 0610007L01RIK | -0.333729564 |
| ILMN_2592709 | NM_008338.2    | IFNGR2        | -0.334035827 |
| ILMN_1233117 |                | E030040G24RIK | -0.334078716 |
| ILMN_2631144 | NM_144884.1    | TOR1A         | -0.334122339 |
| ILMN_2646203 | NM_009870.2    | CDK4          | -0.334211113 |
| ILMN_2656282 | NM_007700.1    | CHUK          | -0.334235663 |
| ILMN_2712044 | NM_016707.2    | BCL11A        | -0.334344392 |
| ILMN_2918987 | NM_024471.2    | LIAS          | -0.33462983  |
| ILMN_2819319 | NM_009104.1    | RRM2          | -0.334672259 |
| ILMN_1221973 | NM_178891.4    | PRMT6         | -0.334837118 |
| ILMN_2708811 | NM_181279.1    | BRE           | -0.334869591 |
| ILMN_2922728 | NM_028456.1    | RWDD3         | -0.334954167 |
| ILMN_2497068 | NM_144516.2    | ZMYND11       | -0.335252651 |
| ILMN_2544126 |                | 2010005E20RIK | -0.335378405 |
| ILMN_2597030 | NM_145533.1    | SMOX          | -0.335432714 |
| ILMN_2651209 | NM_020032.2    | POLL          | -0.335549413 |
| ILMN_2718843 | NM_026640.2    | 4632417K18RIK | -0.33572599  |
| ILMN_1215967 | NM_025442.3    | ALG5          | -0.335988995 |
| ILMN_3058077 | NM_011482.3    | NHP2L1        | -0.336090783 |
| ILMN_2935909 | NM_029410.1    | BCL2L12       | -0.33621622  |
| ILMN_2873444 | NM_026346.1    | FBXO32        | -0.336218197 |
| ILMN_2995794 | NM_001001738.2 | ITPRIP        | -0.336311146 |
| ILMN_2459146 | NM_029835.1    | 5730590G19RIK | -0.336336681 |
| ILMN_2985657 | NM_198642.1    | 5031414D18RIK | -0.336351739 |
| ILMN_2428252 | NM_053268.2    | RASA2         | -0.336462245 |
| ILMN_1230908 |                | 2810407C02RIK | -0.336574915 |
| ILMN_2921698 | NM_144844.1    | PCCA          | -0.336580668 |
| ILMN_2550908 |                | 9430002A10RIK | -0.33684701  |
| ILMN_1234199 | NM_177025.4    | COBLL1        | -0.337441844 |
| ILMN_2681805 | NM_010739.1    | MUC13         | -0.337727971 |
| ILMN_2856697 | NM_007589.4    | CALM2         | -0.337746218 |
| ILMN_1212848 | NM_019743.3    | RYBP          | -0.338075187 |
| ILMN_1215213 | NM_001040396.2 | 2810407C02RIK | -0.338169734 |
| ILMN_1250926 |                | A130049L09RIK | -0.338527296 |
| ILMN_2702471 | NM_134079.3    | ADK           | -0.338754583 |
| ILMN_1217938 |                | AKAP8         | -0.338795588 |
| ILMN_2611155 | NM_019715.1    | KCMF1         | -0.338834696 |
| ILMN_2600453 | NM_031408.2    | GIGYF1        | -0.338845442 |
| ILMN_1245809 | XM_903145.3    | 1810043H04RIK | -0.33903236  |
| ILMN_2538281 | XM_359105.1    | LOC386179     | -0.33921221  |
| ILMN_1246017 | NM_178928.4    | AFAP1L1       | -0.339224812 |
| ILMN_3151492 | NM_001025572.1 | ANKRD12       | -0.339280184 |
| ILMN_3104349 | NM_001037761.1 | CAPZB         | -0.339293034 |
| ILMN_1246321 | NM_008184.1    | GSTM6         | -0.33943352  |
| ILMN_1254405 | NM_019390.1    | LMNA          | -0.339493773 |

|              |                |                 |              |
|--------------|----------------|-----------------|--------------|
| ILMN_2552236 |                | FOXP1           | -0.33951181  |
| ILMN_2910106 | NM_145939.1    | ALG3            | -0.339670255 |
| ILMN_2457995 |                | PRPF4B          | -0.339695032 |
| ILMN_2682333 | XM_001477998.1 | LOC100047368    | -0.340325899 |
| ILMN_2897468 | NM_028131.1    | 2610510J17RIK   | -0.340392125 |
| ILMN_1222917 | NM_011201.3    | PTPN1           | -0.340580385 |
| ILMN_1233116 | NM_008696.2    | MAP4K4          | -0.340672012 |
| ILMN_2912318 | NM_009353.1    | TERF2           | -0.340802258 |
| ILMN_2618795 | NM_026873.2    | PTCD2           | -0.341124941 |
| ILMN_2675853 | XM_001472680.1 | LOC100044636    | -0.34125525  |
| ILMN_2667972 | NM_198683.1    | CUGBP1          | -0.341424557 |
| ILMN_2650793 | XM_129375.9    | CAMSAP1         | -0.341463535 |
| ILMN_1251434 |                | B930089N03RIK   | -0.341478819 |
| ILMN_1214408 | XR_034389.1    | LOC666403       | -0.341498022 |
| ILMN_2876482 | NM_025840.2    | BZW2            | -0.341504965 |
| ILMN_2615709 | NM_026282.4    | SPC24           | -0.341632877 |
| ILMN_1249197 | NM_009649.2    | AKAP2           | -0.341656583 |
| ILMN_2630293 | NM_026302.2    | DCTN4           | -0.34166814  |
| ILMN_2878021 | NM_026482.1    | ATP2B1          | -0.341706005 |
| ILMN_2630593 | NM_007927.2    | EMD             | -0.341791889 |
| ILMN_1225224 | NM_025978.2    | TTC14           | -0.341800361 |
| ILMN_1245322 | NM_029090.3    | NAT15           | -0.341867004 |
| ILMN_2642806 | NM_018785.2    | PRPF40A         | -0.341937363 |
| ILMN_1231253 |                | A730068E08RIK   | -0.342069372 |
| ILMN_3040069 | NM_178216.1    | HIST2H3C1       | -0.342142676 |
| ILMN_1241977 | XM_912044.2    | LOC635297       | -0.342375693 |
| ILMN_2758695 |                | NUP93           | -0.342543868 |
| ILMN_2821788 | NM_145924.2    | CENPI           | -0.34260784  |
| ILMN_2541823 | NM_027740.5    | WDR51B          | -0.34262432  |
| ILMN_2793464 | NM_145209.2    | OASL1           | -0.342666697 |
| ILMN_2872698 | NM_172406.2    | TRAK2           | -0.342887605 |
| ILMN_2795949 | NM_026412.1    | D2ERTD750E      | -0.343043966 |
| ILMN_3118169 | NM_173001.1    | JMJD1A          | -0.343402306 |
| ILMN_2757855 | NM_172545.2    | EHMT1           | -0.343965637 |
| ILMN_2610810 | NM_023066.2    | ASPH            | -0.344033447 |
| ILMN_2689160 | NM_019930.1    | RANBP9          | -0.344044658 |
| ILMN_1227366 | NM_172733.1    | DERA            | -0.344049013 |
| ILMN_2673369 | NM_008320.3    | IRF8            | -0.344102669 |
| ILMN_2912082 | NM_008054.1    | FYN             | -0.344174199 |
| ILMN_1244797 | NM_144553.1    | DLGAP5          | -0.344398692 |
| ILMN_2461088 |                | 5430440L12RIK   | -0.344449274 |
| ILMN_2696360 | NM_027123.2    | 2310010B21RIK   | -0.344581935 |
| ILMN_2730514 | NM_020586.1    | HERPUD2         | -0.344691226 |
| ILMN_1229468 | NM_172578.2    | C79407          | -0.344921265 |
| ILMN_2437797 | AK042145.1     | SCL0004025.1_69 | -0.344931141 |
| ILMN_3072945 | NM_019671.2    | NET1            | -0.345022075 |

|              |                |               |              |
|--------------|----------------|---------------|--------------|
| ILMN_1260181 | NM_178613.3    | 4933433P14RIK | -0.345218997 |
| ILMN_3139253 | NM_001017525.1 | BTBD11        | -0.345385009 |
| ILMN_2628174 | NM_080575.1    | ACSS1         | -0.34544705  |
| ILMN_2974418 | NM_027740.3    | WDR51B        | -0.345519346 |
| ILMN_1242790 | NM_172904.2    | FSD2          | -0.345980172 |
| ILMN_2748584 | XM_001480237.1 | LOC100048221  | -0.345983954 |
| ILMN_1256108 | XM_897700.2    | D14ABB1E      | -0.346158622 |
| ILMN_1213144 | NM_021714.3    | WBP11         | -0.346253036 |
| ILMN_2622630 | NM_028754.1    | 0610037L13RIK | -0.346333999 |
| ILMN_1219840 |                | 2310033F14RIK | -0.346394862 |
| ILMN_1233563 |                | A630053N20RIK | -0.346437576 |
| ILMN_2751709 | NM_025500.1    | MRPL37        | -0.346504296 |
| ILMN_1238497 | NM_019765.4    | CLIP1         | -0.34662452  |
| ILMN_2974737 | NM_177628.3    | BC065085      | -0.346774765 |
| ILMN_2779636 | NM_023434.1    | 5730589K01RIK | -0.346977666 |
| ILMN_2534823 | XM_135371.3    | LOC235857     | -0.347046742 |
| ILMN_2767057 | NM_028469.3    | 3110082I17RIK | -0.347209178 |
| ILMN_1245256 | NM_146084.1    | FAM13B        | -0.347276175 |
| ILMN_2917270 | NM_175558.2    | ZFP446        | -0.347302895 |
| ILMN_1238894 | NM_016777.3    | NASP          | -0.347335222 |
| ILMN_2509798 | NM_011671.2    | UCP2          | -0.347472137 |
| ILMN_2894245 | NM_019460.1    | SFMBT1        | -0.347489903 |
| ILMN_2633275 | NM_025872.4    | GOLT1B        | -0.347540279 |
| ILMN_3124374 | NM_027707.2    | NIPBL         | -0.347650791 |
| ILMN_1238412 |                | SHMT1         | -0.347690935 |
| ILMN_2629582 | NM_008873.2    | PLAU          | -0.347832046 |
| ILMN_2689138 | NM_173735.2    | 2310044G17RIK | -0.347894337 |
| ILMN_2799851 | NM_009018.1    | RAET1C        | -0.347923224 |
| ILMN_2669804 | NM_025794.1    | ETFDH         | -0.348019477 |
| ILMN_2853800 | NM_021390.2    | SALL1         | -0.348305516 |
| ILMN_3078052 | NM_001003916.1 | ZC4H2         | -0.348466452 |
| ILMN_3024238 | NM_028404.1    | TOP1MT        | -0.34876684  |
| ILMN_1243903 | NM_175111.3    | HSPBAP1       | -0.348841503 |
| ILMN_3163063 | NM_001008238.2 | BNIP2         | -0.349223447 |
| ILMN_2539664 | XM_358732.1    | LOC383456     | -0.349251183 |
| ILMN_2808751 | NM_029933.3    | BCL9          | -0.349280692 |
| ILMN_1237333 | XM_354567.1    | LOC380665     | -0.349335473 |
| ILMN_2752989 | NM_009302.2    | SWAP70        | -0.349373428 |
| ILMN_2758728 | NM_025304.3    | LCMT1         | -0.349500005 |
| ILMN_2886646 | NM_013563.3    | IL2RG         | -0.34953862  |
| ILMN_1232495 | XM_001471637.1 | LOC100044177  | -0.349594298 |
| ILMN_1250576 | NM_028341.2    | 2810439F02RIK | -0.349615189 |
| ILMN_3123716 | NM_024431.2    | MORF4L1       | -0.349662914 |
| ILMN_2621160 | NM_028119.4    | DDB2          | -0.349821229 |
| ILMN_2727235 | NM_001081379.1 | ANKRD11       | -0.350342629 |
| ILMN_1232954 | XR_030518.1    | LOC236294     | -0.35036854  |

|              |                |                   |              |
|--------------|----------------|-------------------|--------------|
| ILMN_1231506 | NM_029861.2    | CNRIP1            | -0.350699468 |
| ILMN_1224781 | NM_153064.4    | NDUFS2            | -0.350707468 |
| ILMN_2936954 | NM_026171.1    | NVL               | -0.351003856 |
| ILMN_2696994 | NM_020032.2    | POLL              | -0.351019343 |
| ILMN_2870443 | NM_010236.1    | FPGS              | -0.351024496 |
| ILMN_2632712 | NM_009689.2    | BIRC5             | -0.351064174 |
| ILMN_2950302 | NM_007879.1    | DRG1              | -0.35135561  |
| ILMN_2610600 | NM_020618.3    | SMARCE1           | -0.351694074 |
| ILMN_2642525 | NM_025614.3    | RWDD1             | -0.351787721 |
| ILMN_3161612 | NM_022655.2    | IREB2             | -0.351934923 |
| ILMN_3096144 | NM_011486.4    | STAT3             | -0.352009304 |
| ILMN_2672054 | NM_019680.1    | ENSMUSG0000005351 | -0.352011439 |
| ILMN_2749518 | NM_013594.1    | MBD1              | -0.352155387 |
| ILMN_2699307 | NM_013546.2    | HEBP1             | -0.352265671 |
| ILMN_1224202 |                | 2610103N14RIK     | -0.352272407 |
| ILMN_2836173 | NM_026855.1    | ARV1              | -0.352293634 |
| ILMN_3138419 | NM_001033638.1 | CRXOS1            | -0.352315387 |
| ILMN_2467578 | AK049709.1     | SCL000416.1_19    | -0.352442373 |
| ILMN_2746906 | NM_033080.2    | NUDT19            | -0.352570604 |
| ILMN_2509918 | NM_019656.3    | TSPAN6            | -0.352603269 |
| ILMN_2901655 | NM_144896.2    | PET112L           | -0.352646003 |
| ILMN_1245048 | J05277.1       | SCL0003886.1_50   | -0.352787331 |
| ILMN_2715234 | NM_183263.3    | RNMTL1            | -0.353035448 |
| ILMN_2737903 | NM_013710.3    | FGD2              | -0.353190013 |
| ILMN_1254622 | XM_484933.5    | PCP4L1            | -0.353509305 |
| ILMN_2780286 | NM_001004366.1 | SCUBE3            | -0.353708453 |
| ILMN_3030340 | NM_027874.2    | CSNK1D            | -0.353900783 |
| ILMN_1245109 |                | 3830430K15RIK     | -0.354034951 |
| ILMN_2471289 | NM_020267.2    | TRIM44            | -0.354094231 |
| ILMN_2727920 | NM_009775.2    | TSPO              | -0.3543098   |
| ILMN_2684388 | NM_025969.3    | 1700034H14RIK     | -0.354397693 |
| ILMN_1213191 |                | BRRN1             | -0.354566313 |
| ILMN_2732092 | NM_021296.2    | GRPEL2            | -0.354617795 |
| ILMN_1232123 | NM_134000.3    | TRAF3IP2          | -0.35467332  |
| ILMN_1237967 | NM_030152.4    | NOL3              | -0.354683516 |
| ILMN_2605917 | XM_001479335.1 | LOC100047863      | -0.35471091  |
| ILMN_1231624 | NM_001039684.2 | MKS1              | -0.354818026 |
| ILMN_1220311 |                | 2810003O05RIK     | -0.354843784 |
| ILMN_2640883 | NM_023317.1    | NDE1              | -0.354894666 |
| ILMN_2641449 | NM_016804.2    | MTX2              | -0.354941435 |
| ILMN_2934549 | NM_201364.1    | BC055324          | -0.355027903 |
| ILMN_2641946 | NM_001001882.2 | RTEL1             | -0.355316284 |
| ILMN_2594811 | NM_026000.2    | PSMD9             | -0.355352671 |
| ILMN_2725529 | NM_172812.1    | HTR2A             | -0.355432154 |
| ILMN_1247410 |                | SLC20A1           | -0.355501708 |
| ILMN_2817021 | NM_001033441.1 | ALG10B            | -0.355505961 |

|              |                |                 |              |
|--------------|----------------|-----------------|--------------|
| ILMN_1217378 | NM_011220.2    | PTS             | -0.355527964 |
| ILMN_2551723 |                | 3000003G13RIK   | -0.355746035 |
| ILMN_2754492 | NM_144877.1    | 5630401D24RIK   | -0.35589037  |
| ILMN_1242920 | XM_908501.3    | PFAS            | -0.35597106  |
| ILMN_1235329 |                | ETV5            | -0.35612515  |
| ILMN_2543314 |                | 1110014J17RIK   | -0.356125424 |
| ILMN_1236202 |                | C430015M08RIK   | -0.356286337 |
| ILMN_1222355 | XM_980330.1    | SCN2A1          | -0.356486085 |
| ILMN_3072676 | NM_001025572.1 | ANKRD12         | -0.356494425 |
| ILMN_1249374 |                | 4632427E13RIK   | -0.356567173 |
| ILMN_2741985 | NM_009015.2    | RAD54L          | -0.356665517 |
| ILMN_1248070 |                | P38IP-PENDING   | -0.356830732 |
| ILMN_2429108 |                | 2700024H10RIK   | -0.356940449 |
| ILMN_1232115 | NM_144857.1    | BC011248        | -0.356949612 |
| ILMN_1257110 | NM_026113.4    | GTF3C6          | -0.357392532 |
| ILMN_2534556 | XM_111306.1    | LOC195150       | -0.357515928 |
| ILMN_2731080 | NM_148945.1    | RPS6KA3         | -0.357757533 |
| ILMN_1256502 |                | PTEN            | -0.357765882 |
| ILMN_3162465 | NM_001033192.2 | C78339          | -0.357937022 |
| ILMN_2739486 | XR_034510.1    | LOC100048056    | -0.358005796 |
| ILMN_2582706 |                | B230312E02RIK   | -0.358068894 |
| ILMN_2675587 | NM_024475.2    | BC002236        | -0.358336701 |
| ILMN_2445548 |                | C330006A16RIK   | -0.358407753 |
| ILMN_1234905 | NM_025554.2    | POLR2E          | -0.358951658 |
| ILMN_1260362 | XM_001473902.1 | EG632248        | -0.358951755 |
| ILMN_2542959 | XM_147345.1    | PGLYRPL-PENDING | -0.359401592 |
| ILMN_2734368 | NM_028369.1    | MON1A           | -0.359462671 |
| ILMN_3023230 | NM_001017426.1 | JMJD3           | -0.359479008 |
| ILMN_1225261 | NM_011670.1    | UCHL1           | -0.359632071 |
| ILMN_1254577 | XM_980696.2    | AI607873        | -0.359885811 |
| ILMN_1249677 |                | 2010015J01RIK   | -0.360107164 |
| ILMN_2476466 |                | 2610010A15RIK   | -0.36066389  |
| ILMN_1237942 | NM_145221.2    | APPL1           | -0.360739105 |
| ILMN_1216239 | NM_001081213.1 | ERMP1           | -0.360819089 |
| ILMN_1240871 | NM_025716.2    | SPRYD4          | -0.36098662  |
| ILMN_2771979 | NM_010050.2    | DIO2            | -0.361003295 |
| ILMN_2556771 |                | 9330171D12RIK   | -0.361014698 |
| ILMN_2503318 | NM_019490.1    | USO1            | -0.361217988 |
| ILMN_3127375 | NM_134150.2    | OTUB1           | -0.361267254 |
| ILMN_1245709 |                | 5830411K21RIK   | -0.361294482 |
| ILMN_2546724 | NM_019553.2    | DDX21           | -0.361334343 |
| ILMN_2802244 | NM_145628.2    | USP11           | -0.361334665 |
| ILMN_3151281 | NM_178658.4    | 6330500D04RIK   | -0.361443912 |
| ILMN_3059326 | NM_009242.1    | SPARC           | -0.361572653 |
| ILMN_1217705 | XM_358371.1    | C130002K18RIK   | -0.361819805 |
| ILMN_3126848 | NM_008627.2    | MEIS3           | -0.361845339 |

|              |                |               |              |
|--------------|----------------|---------------|--------------|
| ILMN_2704360 | NM_028082.1    | CNOT2         | -0.361916242 |
| ILMN_1237696 | NM_019674.3    | PPP4C         | -0.361980449 |
| ILMN_2638404 | NM_133865.2    | DCLRE1B       | -0.362119607 |
| ILMN_2892227 | NM_027976.2    | ACSL5         | -0.36226122  |
| ILMN_2789650 | NM_013808.3    | CSRP3         | -0.362320803 |
| ILMN_1230623 | NM_009030.3    | RBBP4         | -0.362488057 |
| ILMN_1248569 | NM_013896.3    | TIMM9         | -0.362527206 |
| ILMN_1240074 | NM_001025599.2 | TRIM26        | -0.362700187 |
| ILMN_1239432 | NM_033609.2    | MED15         | -0.362771911 |
| ILMN_2940399 | NM_026113.2    | 2410016F19RIK | -0.362811666 |
| ILMN_2579086 |                | SLC35A3       | -0.362858762 |
| ILMN_1247302 | NM_026543.2    | 3010026O09RIK | -0.362990825 |
| ILMN_2590771 | NM_175352.4    | UNC119B       | -0.363483236 |
| ILMN_2752362 | NM_053070.1    | CAR7          | -0.363671592 |
| ILMN_1237565 | XR_032288.1    | EG626367      | -0.363820875 |
| ILMN_2937548 | NM_175657.1    | HIST1H4M      | -0.364016722 |
| ILMN_2906948 | NM_175258.3    | RAPGEF6       | -0.364046034 |
| ILMN_2586024 |                | NUP98         | -0.364060219 |
| ILMN_2581419 |                | E330031M19RIK | -0.364337521 |
| ILMN_1231885 | NM_181589.2    | CKAP2L        | -0.364429667 |
| ILMN_2957862 | NM_153570.2    | NOC4L         | -0.364460909 |
| ILMN_2531903 | XM_001476882.1 | EG232875      | -0.364518054 |
| ILMN_2740464 | NM_008364.1    | IL1RAP        | -0.364866785 |
| ILMN_2719001 | NM_028042.3    | ERCC8         | -0.364968005 |
| ILMN_1251488 | XM_922989.2    | A430041B07RIK | -0.365133342 |
| ILMN_3128351 | NM_022318.2    | POPDC2        | -0.365194835 |
| ILMN_2688740 | NM_172699.2    | FOXJ3         | -0.365276184 |
| ILMN_1226447 | NM_013659.3    | SEMA4B        | -0.365291445 |
| ILMN_1221620 | NM_010553.2    | IL18RAP       | -0.36531953  |
| ILMN_1219173 | NM_021315.1    | NOC3L         | -0.365535636 |
| ILMN_2620053 | NM_028717.3    | ALS2          | -0.365652089 |
| ILMN_1230028 |                | B130017N24RIK | -0.365901013 |
| ILMN_2769521 | XM_357441.1    | PTAFR         | -0.366523242 |
| ILMN_2618590 | NM_198861.1    | BC046404      | -0.366655422 |
| ILMN_1227925 | NM_016890.3    | DCTN3         | -0.366819437 |
| ILMN_2769131 |                | PPP2R4        | -0.366844065 |
| ILMN_2454692 | NM_145500.3    | UBTD1         | -0.367334141 |
| ILMN_1247036 | NM_009441.2    | TTC3          | -0.367383846 |
| ILMN_2591782 | XM_001480281.1 | LOC100048313  | -0.367473119 |
| ILMN_3103784 | NM_025854.1    | 1700023B02RIK | -0.367732174 |
| ILMN_2717150 |                | D6ERTD349E    | -0.367793616 |
| ILMN_2846776 | NM_007669.2    | CDKN1A        | -0.367908052 |
| ILMN_2611532 | NM_026071.2    | SLC25A19      | -0.367933161 |
| ILMN_2730516 | NM_020586.1    | HERPUD2       | -0.368152449 |
| ILMN_2768805 | NM_178654.3    | PKN2          | -0.36821281  |
| ILMN_2715042 | NM_011520.3    | SDC3          | -0.368539829 |

|              |                |               |              |
|--------------|----------------|---------------|--------------|
| ILMN_2544868 |                | 2610312E17RIK | -0.368553935 |
| ILMN_1225133 | NM_025533.2    | NOSIP         | -0.368646379 |
| ILMN_1249751 |                | MSH2          | -0.368700864 |
| ILMN_2728516 | XM_355872.1    | PSMC4         | -0.368721891 |
| ILMN_1245519 | NM_028905.2    | 4932438H23RIK | -0.368766618 |
| ILMN_1243662 | NM_145538.2    | TMEM189       | -0.368867353 |
| ILMN_1214806 | XM_001475233.1 | 4932438A13RIK | -0.368921804 |
| ILMN_2830979 | NM_144872.1    | EML3          | -0.368968898 |
| ILMN_1214307 | NM_001033158.1 | RASL12        | -0.369005431 |
| ILMN_1249559 |                | 5730494J16RIK | -0.369025658 |
| ILMN_2844784 | NM_022997.2    | VPS35         | -0.369098919 |
| ILMN_1217812 | NM_001033039.2 | KLHDC9        | -0.369343575 |
| ILMN_2982958 | NM_019748.1    | SAE1          | -0.3696372   |
| ILMN_2681604 | NM_001038998.1 | CCDC23        | -0.369714094 |
| ILMN_1238919 | NM_007879.1    | DRG1          | -0.369805308 |
| ILMN_2707996 | NM_133353.3    | OOSP1         | -0.369930308 |
| ILMN_2986549 | NM_008119.2    | GIP           | -0.369943335 |
| ILMN_2982250 | NM_018736.2    | MRE11A        | -0.370359559 |
| ILMN_2847038 | NM_054082.1    | MTA3          | -0.370582375 |
| ILMN_2756618 | NM_025507.2    | SNW1          | -0.370614738 |
| ILMN_2416488 | NM_176972.3    | USP37         | -0.370978878 |
| ILMN_2772710 |                | MS4A6C        | -0.371090745 |
| ILMN_2480021 | NM_026676.2    | 0610007P22RIK | -0.371289562 |
| ILMN_2688569 | NM_010945.1    | NSMAF         | -0.371330267 |
| ILMN_1216561 |                | CAMK2D        | -0.371419729 |
| ILMN_1260152 |                | 9430046I01RIK | -0.37166849  |
| ILMN_1241845 | NM_025616.3    | TIMM50        | -0.371678185 |
| ILMN_1228411 |                | A630055I06RIK | -0.371812248 |
| ILMN_2426480 |                | 3830612M24    | -0.372057177 |
| ILMN_2626294 | NM_013626.1    | PAM           | -0.372112642 |
| ILMN_2452383 | NM_009479.2    | UROS          | -0.37212695  |
| ILMN_3145415 | NM_177253.1    | CSTF3         | -0.372172365 |
| ILMN_2797239 | NM_019415.1    | SLC12A3       | -0.372189384 |
| ILMN_1230912 | NM_027642.1    | PHF6          | -0.372723926 |
| ILMN_1230215 |                | 6720406L13RIK | -0.3729571   |
| ILMN_2686393 | NM_010302.2    | GNA12         | -0.372977404 |
| ILMN_2789077 | NM_010578.1    | ITGB1         | -0.373012397 |
| ILMN_2687602 | NM_011138.1    | POU2F2        | -0.373053166 |
| ILMN_1218413 | NM_013923.2    | RNF19A        | -0.373076598 |
| ILMN_2591749 | NM_009278.3    | SSB           | -0.373116314 |
| ILMN_2913716 | NM_207105.1    | H2-AB1        | -0.373188331 |
| ILMN_2661950 | XM_918384.3    | GIN51         | -0.373297229 |
| ILMN_2435814 | NM_053168.1    | TRIM11        | -0.373619141 |
| ILMN_2575986 |                | A730085F06RIK | -0.373661216 |
| ILMN_2718090 | NM_020329.3    | DOLPP1        | -0.373888074 |
| ILMN_2568397 |                | A530025E09RIK | -0.374320011 |



|              |                |               |              |
|--------------|----------------|---------------|--------------|
| ILMN_3059059 | NM_023120.4    | GNB1L         | -0.374335392 |
| ILMN_3022911 | NM_001012434.2 | KCTD14        | -0.374504744 |
| ILMN_2553280 |                | 4732470M22RIK | -0.374543184 |
| ILMN_2971577 | NM_153572.1    | KATNAL1       | -0.374550255 |
| ILMN_1241880 |                | C230055K21RIK | -0.374590549 |
| ILMN_1255921 | NM_023479.1    | ELAC2         | -0.374802146 |
| ILMN_2480136 | NM_153538.1    | ZCCHC6        | -0.374941069 |
| ILMN_2420070 | NM_134024.2    | TUBG1         | -0.375033033 |
| ILMN_2703354 | NM_019785.1    | ACTR10        | -0.375110428 |
| ILMN_1244139 | XM_357835.1    | LOC384742     | -0.375205646 |
| ILMN_2739340 | NM_175364.3    | LYRM2         | -0.375405533 |
| ILMN_1242777 | NM_001001184.1 | CCDC111       | -0.375530509 |
| ILMN_2764580 | NM_022321.3    | PARVG         | -0.375635293 |
| ILMN_2740445 | NM_016710.2    | NSBP1         | -0.375734965 |
| ILMN_1214761 |                | MAPK8         | -0.37597372  |
| ILMN_1239185 | NM_026129.2    | ERP29         | -0.376171906 |
| ILMN_1219667 | NM_011070.3    | PFDN2         | -0.37617879  |
| ILMN_1244492 |                | ZFP472        | -0.376180282 |
| ILMN_1248892 | NM_145599.3    | TMEM184C      | -0.376367156 |
| ILMN_1217683 | NM_011395.2    | SLC22A3       | -0.376545154 |
| ILMN_2743756 | NM_001004436.3 | WAPAL         | -0.376562366 |
| ILMN_2636525 | NM_008418.1    | KCNA3         | -0.3765995   |
| ILMN_1223695 | NM_029086.2    | 5830415F09RIK | -0.37677203  |
| ILMN_3071068 | NM_001010973.2 | HRH2          | -0.376841938 |
| ILMN_1241320 | NM_175554.3    | CLSPN         | -0.376852543 |
| ILMN_1219994 | NM_007723.2    | CNGA1         | -0.377239363 |
| ILMN_1241924 | NM_022992.2    | ARL6IP5       | -0.377396173 |
| ILMN_1244674 | NM_001081256.1 | JMJD1B        | -0.37754286  |
| ILMN_2435996 |                | 0610007P22RIK | -0.377673648 |
| ILMN_3048899 | NM_008812.1    | PADI2         | -0.377709653 |
| ILMN_1213786 | NM_001081323.1 | MPHOSPH9      | -0.377753053 |
| ILMN_2725134 | NM_172825.1    | GPR128        | -0.377792308 |
| ILMN_1218446 | XM_358222.1    | LOC385392     | -0.377953528 |
| ILMN_3031706 | NM_024262.1    | 1200011M11RIK | -0.378035973 |
| ILMN_2534170 | NM_001009927.1 | SMCR7         | -0.378078826 |
| ILMN_1241657 | NM_028082.1    | CNOT2         | -0.37812502  |
| ILMN_2454788 | NM_016757.2    | WBP1          | -0.378229117 |
| ILMN_1235497 |                | HMG20A        | -0.378565788 |
| ILMN_2931095 | NM_010515.1    | IGF2R         | -0.378758129 |
| ILMN_2894450 | NM_026912.1    | SNX15         | -0.378939003 |
| ILMN_1257003 | NM_178914.3    | SPATA7        | -0.378987112 |
| ILMN_2667971 | NM_198683.1    | CUGBP1        | -0.379000869 |
| ILMN_1236624 | XM_912043.2    | EG665369      | -0.379001533 |
| ILMN_1213981 | NM_010774.1    | MBD4          | -0.379265843 |
| ILMN_1250358 | NM_133240.1    | ACOT8         | -0.379276202 |
| ILMN_1236507 |                | 5830496L11RIK | -0.379323555 |

|              |                |                 |              |
|--------------|----------------|-----------------|--------------|
| ILMN_2728729 | NM_011521.2    | SDC4            | -0.37937298  |
| ILMN_1257788 | NM_175287.3    | A430005L14RIK   | -0.379399909 |
| ILMN_2529851 | XM_354943.1    | LOC381034       | -0.379490104 |
| ILMN_2632008 | NM_175489.3    | OSBPL8          | -0.379822932 |
| ILMN_1254869 |                | A130082N24RIK   | -0.379844808 |
| ILMN_2621385 | NM_007415.2    | PARP1           | -0.379973763 |
| ILMN_2674979 | NM_139149.1    | FUS             | -0.380050224 |
| ILMN_1228298 | NM_212433.1    | FBXO3           | -0.380696087 |
| ILMN_2473562 | NM_022964.3    | LAT2            | -0.380862961 |
| ILMN_1232237 | NM_134141.4    | CIAPIN1         | -0.380894079 |
| ILMN_2428931 |                | 4631426J05RIK   | -0.380945297 |
| ILMN_2698757 | NM_178726.3    | PPM1L           | -0.381066891 |
| ILMN_1224945 |                | E130113K22RIK   | -0.381122702 |
| ILMN_2868188 | NM_009462.1    | USP10           | -0.381179968 |
| ILMN_1248132 |                | STMN1           | -0.381269033 |
| ILMN_2606331 | XR_035125.1    | AI504432        | -0.381311437 |
| ILMN_1258357 | NM_013739.2    | DOK3            | -0.381369862 |
| ILMN_2826161 | NM_025579.1    | TAF12           | -0.382001239 |
| ILMN_1244516 | NM_011242.2    | RASGRP2         | -0.382084739 |
| ILMN_2550439 |                | 2810453H10RIK   | -0.382315288 |
| ILMN_2570121 |                | E130318A13RIK   | -0.382406045 |
| ILMN_1255013 | NM_010561.1    | ILF3            | -0.382408205 |
| ILMN_2776025 | NM_008019.2    | FKBP1A          | -0.38261451  |
| ILMN_1213376 | NM_007687.2    | CFL1            | -0.383326797 |
| ILMN_2672091 | NM_010414.1    | HTT             | -0.383619371 |
| ILMN_2774007 |                | BUB1B           | -0.383693992 |
| ILMN_1224380 | NM_019650.2    | GOSR2           | -0.383713985 |
| ILMN_1232512 |                | SCL0004023.1_57 | -0.383797545 |
| ILMN_2578216 |                | 6430402F21RIK   | -0.383802702 |
| ILMN_1256434 | NM_025662.4    | PIGK            | -0.383965524 |
| ILMN_2940802 | NM_024242.2    | RIOK1           | -0.383992262 |
| ILMN_2929621 | NM_001081422.1 | A230054D04RIK   | -0.383998643 |
| ILMN_1255581 | XR_001819.2    | LOC630936       | -0.384079605 |
| ILMN_2731057 | NM_011190.3    | PSME2           | -0.384448296 |
| ILMN_2591217 | NM_025936.1    | RARS            | -0.384662914 |
| ILMN_2992653 | NM_013600.1    | MSH5            | -0.384710019 |
| ILMN_1235390 | NM_018782.1    | CALCRL          | -0.384809496 |
| ILMN_2633530 | NM_007649.4    | CD48            | -0.384875689 |
| ILMN_2664040 | NM_020559.1    | ALAS1           | -0.384878599 |
| ILMN_2620122 | NM_011026.2    | P2RX4           | -0.384945417 |
| ILMN_1246770 |                | YBX3            | -0.385038491 |
| ILMN_2638066 | NM_016886.2    | GRIA3           | -0.385081956 |
| ILMN_1236821 | NM_029645.3    | GATC            | -0.38516595  |
| ILMN_2565096 |                | B130008O17RIK   | -0.38524569  |
| ILMN_2699645 | NM_194054.2    | RTN4            | -0.385281267 |
| ILMN_1223051 | NM_024205.1    | 1200003C05RIK   | -0.385295094 |

|              |                |                 |              |
|--------------|----------------|-----------------|--------------|
| ILMN_2704165 | NM_153064.4    | NDUFS2          | -0.385331982 |
| ILMN_1236037 | XR_033591.1    | LOC627317       | -0.38545514  |
| ILMN_1230345 | XM_150222.1    | B830007D08RIK   | -0.385535916 |
| ILMN_1225182 | NM_013538.4    | CDCA3           | -0.385665761 |
| ILMN_2676066 | NM_139308.1    | STARD7          | -0.386199764 |
| ILMN_2754787 | NM_025822.3    | RSRC1           | -0.386273714 |
| ILMN_2515695 |                | A230074L19RIK   | -0.386397181 |
| ILMN_3053203 | NM_173015.2    | MON1B           | -0.386397643 |
| ILMN_1241345 | NM_001081135.1 | PRRG3           | -0.387033964 |
| ILMN_1232152 | XM_355157.1    | LOC381219       | -0.387037725 |
| ILMN_2614380 | NM_011945.2    | MAP3K1          | -0.387367466 |
| ILMN_1229687 | NM_025999.2    | RNF141          | -0.387377767 |
| ILMN_1220943 | NM_028334.3    | NUP37           | -0.387629189 |
| ILMN_2430502 | BC068122.1     | SCL000179.1_19  | -0.387750581 |
| ILMN_2607160 | NM_030723.1    | PUM2            | -0.387754234 |
| ILMN_2688721 |                | 5830468K18RIK   | -0.388136421 |
| ILMN_1218559 | XM_485050.5    | LOC433464       | -0.388255672 |
| ILMN_1249638 | NM_009030.3    | RBBP4           | -0.388280386 |
| ILMN_2461871 | XM_356680.1    | SCL0003651.1_17 | -0.388280653 |
| ILMN_2900962 | NM_010267.2    | GDAP1           | -0.388337969 |
| ILMN_2704927 | NM_198626.1    | AI480653        | -0.388375962 |
| ILMN_1258982 |                | SRR             | -0.38838007  |
| ILMN_1214416 | NM_009281.3    | ZFP143          | -0.388438757 |
| ILMN_2563884 |                | 5730478M09RIK   | -0.388496479 |
| ILMN_2832884 | NM_172291.1    | FOXRED1         | -0.388522726 |
| ILMN_2835053 | NM_001009951.1 | BC088983        | -0.388583314 |
| ILMN_2685770 | NM_033509.3    | VANGL2          | -0.388664238 |
| ILMN_2514502 |                | 1700085B03RIK   | -0.388898267 |
| ILMN_3049455 | NM_008044.1    | FXN             | -0.388952237 |
| ILMN_2619249 | NM_172926.2    | SNX14           | -0.388990201 |
| ILMN_1222402 | XM_358347.1    | PLA2G4B         | -0.389269311 |
| ILMN_2596369 | NM_007725.2    | CNN2            | -0.389702261 |
| ILMN_2547840 |                | 2200005K02RIK   | -0.389826674 |
| ILMN_1224584 | XM_001479405.1 | LOC100047904    | -0.389888963 |
| ILMN_2881610 | NM_001013405.1 | D9ERTD402E      | -0.389895424 |
| ILMN_2687881 | NM_008999.3    | RAB23           | -0.389915648 |
| ILMN_2642985 | NM_053262.3    | HSD17B11        | -0.389980247 |
| ILMN_1238733 | NM_152817.3    | TTC27           | -0.390000204 |
| ILMN_2697069 | NM_020567.1    | GMNN            | -0.39082992  |
| ILMN_2424690 | NM_020022.2    | RFC2            | -0.391113772 |
| ILMN_2742703 | NM_013516.1    | MS4A2           | -0.39120225  |
| ILMN_1251669 | NM_010161.3    | EVI2A           | -0.391286411 |
| ILMN_2709935 | NM_019796.4    | SYNCRIP         | -0.391355147 |
| ILMN_2538574 | XM_359198.1    | LOC386389       | -0.39158593  |
| ILMN_1258125 | NM_019773.1    | RAB9            | -0.391607029 |
| ILMN_2715730 |                | SPN             | -0.391774232 |

|              |                |               |              |
|--------------|----------------|---------------|--------------|
| ILMN_1250338 | NM_001015681.1 | E130308A19RIK | -0.391884355 |
| ILMN_1241536 | XM_355612.1    | LOC381649     | -0.392276521 |
| ILMN_2819530 | NM_028003.1    | D15ERTD682E   | -0.392308027 |
| ILMN_2547942 | NM_178856.1    | GIN52         | -0.392406105 |
| ILMN_2508519 | NM_011690.2    | VARS          | -0.392541435 |
| ILMN_2553577 |                | RSDR1-PENDING | -0.392687887 |
| ILMN_2741693 | NM_198423.1    | BC060615      | -0.392756792 |
| ILMN_2627006 | XM_001002157.2 | AKAP11        | -0.392770686 |
| ILMN_2857095 | NM_176943.2    | 9630028B13RIK | -0.392890296 |
| ILMN_1252819 | NM_145404.1    | PRMT7         | -0.393028665 |
| ILMN_1260604 | NM_146051.2    | 3830406C13RIK | -0.393221531 |
| ILMN_2650392 | NM_133925.1    | RBM28         | -0.393414592 |
| ILMN_2719973 | NM_016697.2    | GPC3          | -0.393562379 |
| ILMN_3156343 | NM_011710.2    | WARS          | -0.393672872 |
| ILMN_2566321 |                | 9930108O06RIK | -0.393933972 |
| ILMN_2661168 | NM_175308.4    | MOBKL2C       | -0.393954855 |
| ILMN_2753515 | NM_001033136.2 | 1200015F23RIK | -0.393998634 |
| ILMN_1236868 |                | IDB2          | -0.394065032 |
| ILMN_1258421 | NM_145955.3    | 1110007A13RIK | -0.394221816 |
| ILMN_2981550 | NM_007600.2    | CAPN1         | -0.39470263  |
| ILMN_2760263 | NM_026389.3    | POLDIP2       | -0.394726912 |
| ILMN_2550382 |                | 2410152H17RIK | -0.395083977 |
| ILMN_1260410 | NM_018828.2    | FNBP4         | -0.395087955 |
| ILMN_2746328 | NM_030560.3    | BC003993      | -0.395088298 |
| ILMN_2480178 | NM_019573.2    | WVOX          | -0.395437843 |
| ILMN_1243564 | NM_133942.2    | PLEKHA1       | -0.395461233 |
| ILMN_2488405 | XM_001474212.1 | 1110029I05RIK | -0.395684795 |
| ILMN_2673926 | NM_025950.2    | CDC37L1       | -0.395852912 |
| ILMN_2638923 | NR_003278.1    | RN18S         | -0.395880606 |
| ILMN_2704873 | NM_175660.2    | HIST1H2AB     | -0.396016992 |
| ILMN_2760226 | NM_172148.1    | B9D2          | -0.396034849 |
| ILMN_1244840 |                | 4833435K08RIK | -0.396351909 |
| ILMN_2481771 | NM_009803.4    | NR1I3         | -0.396528362 |
| ILMN_2560379 |                | CD84          | -0.396538153 |
| ILMN_3066763 | NM_007487.3    | ARL4A         | -0.396553159 |
| ILMN_1232592 | NM_009541.1    | ZBTB17        | -0.396597962 |
| ILMN_1214448 | NM_001039720.1 | 9030619P08RIK | -0.396692443 |
| ILMN_1234585 | NM_001007581.1 | 2810408M09RIK | -0.39691284  |
| ILMN_1256538 | XM_620647.3    | GM1815        | -0.396917357 |
| ILMN_2922334 | NM_172442.2    | DTX4          | -0.397099899 |
| ILMN_1230916 | XR_033167.1    | LOC433955     | -0.397258429 |
| ILMN_3153893 | NM_053009.2    | ZFP91         | -0.397314934 |
| ILMN_2928875 | NM_024173.1    | ATP6V1G1      | -0.397326636 |
| ILMN_2660729 | XM_129375.9    | CAMSAP1       | -0.397341139 |
| ILMN_1245957 |                | GM169         | -0.397773236 |
| ILMN_1221304 | NM_178923.3    | SFRS15        | -0.397778179 |

|              |                |               |              |
|--------------|----------------|---------------|--------------|
| ILMN_1216110 | NM_029529.3    | SLC35D3       | -0.397795085 |
| ILMN_1228696 | NM_007398.3    | ADA           | -0.397973051 |
| ILMN_2752044 | NM_026446.3    | RGS19         | -0.398520828 |
| ILMN_2907351 | NM_009484.2    | UTY           | -0.398541742 |
| ILMN_2646380 |                | GABPB1        | -0.3986063   |
| ILMN_2637804 | NM_199019.1    | 4933407P14RIK | -0.398920417 |
| ILMN_2756438 | NM_027898.2    | D7BWG0611E    | -0.399135731 |
| ILMN_2592810 | NM_011947.3    | MAP3K3        | -0.399254988 |
| ILMN_2505047 |                | POGK          | -0.39935769  |
| ILMN_1227384 |                | CCNL          | -0.399376451 |
| ILMN_3060168 | NM_134126.2    | IFT140        | -0.399746769 |
| ILMN_2975892 | NM_010062.3    | DNASE2A       | -0.399774122 |
| ILMN_2797642 | NM_144818.1    | NCAPH         | -0.399878047 |
| ILMN_1215305 | NM_020005.3    | KAT2B         | -0.399979116 |
| ILMN_1241363 |                | ANXA6         | -0.400078216 |
| ILMN_2635377 | NM_080562.4    | UBOX5         | -0.40023845  |
| ILMN_1226555 |                | 5430417L22RIK | -0.400299982 |
| ILMN_2657478 | NM_007651.2    | CD53          | -0.400303959 |
| ILMN_2511971 | NM_001001735.1 | WHSC1L1       | -0.400398113 |
| ILMN_1224778 | NM_027139.4    | TAF9          | -0.400430102 |
| ILMN_2688427 | NM_144922.1    | HNRPUL1       | -0.400673433 |
| ILMN_1248425 | NM_194335.2    | NAIF1         | -0.401209955 |
| ILMN_2824167 | NM_012029.1    | ECSIT         | -0.401450945 |
| ILMN_1257485 | NM_026312.2    | 2610029G23RIK | -0.401559108 |
| ILMN_1230620 | XM_001473500.1 | LOC100039786  | -0.401810772 |
| ILMN_3122864 | NM_019816.1    | AATF          | -0.401814138 |
| ILMN_2698699 | NM_025648.2    | FARSA         | -0.401894327 |
| ILMN_2607557 | XM_358331.1    | 9130218E19RIK | -0.402130276 |
| ILMN_2560567 |                | A630006E02RIK | -0.402472633 |
| ILMN_3163124 | NM_029736.1    | SLC10A7       | -0.402831934 |
| ILMN_2617384 | NM_008028.1    | FLOT2         | -0.4028656   |
| ILMN_2698652 | NM_144918.2    | SMYD5         | -0.403068745 |
| ILMN_2665788 | NM_010612.2    | KDR           | -0.403080942 |
| ILMN_1232600 | NM_026301.2    | RNF125        | -0.40336434  |
| ILMN_1241831 | NM_133193.3    | IL1RL2        | -0.40340777  |
| ILMN_1230460 |                | B430110C06RIK | -0.403479744 |
| ILMN_2940785 | NM_178719.3    | SMCR7L        | -0.403690524 |
| ILMN_1245302 | NM_001081080.1 | PHF3          | -0.403948041 |
| ILMN_1239814 |                | 2610016D08RIK | -0.404258235 |
| ILMN_1217809 | XM_356568.1    | LOC382557     | -0.404319135 |
| ILMN_1246713 | NM_134060.3    | SLC35B3       | -0.405051283 |
| ILMN_2751207 | NM_008054.1    | FYN           | -0.405260298 |
| ILMN_1217919 | NM_138598.5    | D11WSU99E     | -0.40547873  |
| ILMN_2925169 | NM_013548.2    | HIST1H3F      | -0.405504319 |
| ILMN_3111421 | NM_001025947.1 | DNM1L         | -0.405566238 |
| ILMN_2639239 | NM_011340.3    | SERPINF1      | -0.405584242 |

|              |                |               |              |
|--------------|----------------|---------------|--------------|
| ILMN_2919433 | NM_009862.1    | CDC45L        | -0.405703949 |
| ILMN_1218131 | NM_183028.3    | PCMTD1        | -0.405782528 |
| ILMN_1260582 | XM_203701.3    | LOC280487     | -0.405803404 |
| ILMN_2802103 | NM_001081975.1 | MFAP1B        | -0.405819733 |
| ILMN_2870696 | NM_010424.2    | HFE           | -0.405861439 |
| ILMN_1231734 | NM_008739.3    | NSD1          | -0.406251611 |
| ILMN_2919259 | NM_009128.1    | SCD2          | -0.406328419 |
| ILMN_1244721 | NM_173028.3    | VPS13A        | -0.406709274 |
| ILMN_1212649 | NM_027375.2    | GCC2          | -0.406903974 |
| ILMN_2872537 | NM_170591.1    | NUPL1         | -0.407066731 |
| ILMN_2924969 | NR_002928.1    | GM1943        | -0.407129114 |
| ILMN_2424912 | NM_009497.3    | VAMP2         | -0.407238548 |
| ILMN_1256564 | NM_009647.4    | AK3L1         | -0.407387984 |
| ILMN_2826881 | NM_008652.2    | MYBL2         | -0.407465493 |
| ILMN_2767322 | NM_183028.1    | A030012M09RIK | -0.407583559 |
| ILMN_1238517 | NM_027295.2    | RAB28         | -0.407653167 |
| ILMN_2805945 | NM_030685.1    | D3UCLA1       | -0.407680459 |
| ILMN_2693940 | NM_010724.1    | PSMB8         | -0.407749964 |
| ILMN_2768831 | NM_009172.1    | SIAH1A        | -0.408063914 |
| ILMN_2641514 |                | TAF12         | -0.408122032 |
| ILMN_1243249 |                | 2810410A03RIK | -0.408176171 |
| ILMN_2763294 |                | ENSA          | -0.408303559 |
| ILMN_1258685 | XM_193257.2    | LOC269213     | -0.408524269 |
| ILMN_1223300 | XM_980152.1    | BC016423      | -0.408640887 |
| ILMN_2734234 | NM_146096.3    | FAM108B       | -0.408699565 |
| ILMN_2506489 |                | NAV1          | -0.408776405 |
| ILMN_2544368 |                | 2610042F04RIK | -0.408806527 |
| ILMN_2420434 |                | 5530401J07RIK | -0.409110883 |
| ILMN_1238423 | NM_001039474.1 | TCERG1        | -0.409365453 |
| ILMN_2646322 | NM_023380.2    | SAMSN1        | -0.409412847 |
| ILMN_2546272 |                | GNG12         | -0.409462248 |
| ILMN_2541675 | XM_356225.1    | LOC382128     | -0.409478578 |
| ILMN_3116570 | NM_024221.3    | PDHB          | -0.409478897 |
| ILMN_1246270 | NM_178856.1    | GINS2         | -0.409534149 |
| ILMN_3160529 | NM_001033194.2 | GTF3C3        | -0.409979154 |
| ILMN_1237639 |                | D030070I18RIK | -0.410001765 |
| ILMN_1242724 | NM_025950.2    | CDC37L1       | -0.410274595 |
| ILMN_1236393 |                | LY78          | -0.410337395 |
| ILMN_2751492 | NM_145583.2    | FRAG1         | -0.410478976 |
| ILMN_3162536 | NM_001037937.2 | DEPDC6        | -0.410573318 |
| ILMN_2551266 |                | 0610009D07RIK | -0.410882855 |
| ILMN_3045152 | NM_133716.2    | SMAP2         | -0.411029113 |
| ILMN_2696609 | NM_030054.2    | MSCP          | -0.411144346 |
| ILMN_3075113 | NM_028304.2    | PUS10         | -0.411357558 |
| ILMN_1251930 | NM_016777.3    | NASP          | -0.411624357 |
| ILMN_2526599 | XM_129521.2    | LOC226486     | -0.41165145  |

|              |                |               |              |
|--------------|----------------|---------------|--------------|
| ILMN_2693387 | NM_029468.1    | ZFP821        | -0.412011951 |
| ILMN_2648224 |                | TILZ3C        | -0.41221742  |
| ILMN_1257876 | NM_175383.2    | B3GNT1        | -0.412317556 |
| ILMN_2547078 | NM_026083.2    | ZC3H13        | -0.41243131  |
| ILMN_2610861 | NM_009680.2    | AP3B1         | -0.412654877 |
| ILMN_2617505 | NM_026849.1    | MTMR14        | -0.412940291 |
| ILMN_2730074 | NM_001004721.1 | PIGU          | -0.413030585 |
| ILMN_1226683 |                | PSMB8         | -0.413074068 |
| ILMN_2804523 | NM_153459.2    | DUSP7         | -0.413255457 |
| ILMN_1221953 | NM_027658.1    | HEXIM2        | -0.413640727 |
| ILMN_1250821 | XM_357995.1    | LOC385019     | -0.413700131 |
| ILMN_2539352 | XM_357614.1    | LOC384384     | -0.413928084 |
| ILMN_1240429 | NM_183106.2    | TTC17         | -0.414513    |
| ILMN_2544343 | NM_138672.2    | STAB1         | -0.414523443 |
| ILMN_2705628 | NM_010819.3    | CLEC4D        | -0.414524174 |
| ILMN_1219647 | NM_001081109.1 | LMTK2         | -0.414908313 |
| ILMN_3149218 | NM_029862.1    | 5930434B04RIK | -0.415306753 |
| ILMN_1237918 | XM_359079.1    | LOC386123     | -0.415694339 |
| ILMN_1231952 | XM_001472383.1 | LOC100044101  | -0.415960523 |
| ILMN_2641269 | NM_172379.1    | AA536717      | -0.416267912 |
| ILMN_2745354 | NM_009677.4    | AP1G1         | -0.416272545 |
| ILMN_2720506 | XM_355123.1    | 5530401A10RIK | -0.416400096 |
| ILMN_1250260 | NM_008349.4    | IL10RB        | -0.416450147 |
| ILMN_3067068 | NM_025284.3    | TMSB10        | -0.416491297 |
| ILMN_2673233 | NM_019703.3    | PFKP          | -0.41654867  |
| ILMN_2630521 | NM_030609.1    | HIST1H1A      | -0.416744717 |
| ILMN_2608666 | XM_976438.2    | IQWD1         | -0.416834631 |
| ILMN_3021465 | NM_001077707.1 | SHPRH         | -0.417092332 |
| ILMN_2734391 | NM_016894.2    | RAMP1         | -0.417367255 |
| ILMN_2497455 |                | D430007A19RIK | -0.417412552 |
| ILMN_1248432 | XM_973899.1    | NEK1          | -0.417478129 |
| ILMN_2543507 | XM_985039.1    | 1190007I07RIK | -0.417943476 |
| ILMN_2716838 | NM_008300.3    | HSPA4         | -0.418130514 |
| ILMN_2435521 | NM_026137.3    | WDR13         | -0.418468307 |
| ILMN_1219118 | NM_173015.2    | MON1B         | -0.418571835 |
| ILMN_1217337 | NM_134041.2    | 4930427A07RIK | -0.418804367 |
| ILMN_1221827 |                | 2810405J23RIK | -0.41895314  |
| ILMN_1251303 | XM_981952.1    | CEP110        | -0.419154588 |
| ILMN_2763825 | NM_027184.1    | IPMK          | -0.419259303 |
| ILMN_2867901 | NM_023223.1    | CDC20         | -0.419347934 |
| ILMN_1221750 | NM_008506.2    | MYCL1         | -0.419473205 |
| ILMN_2654276 | XM_001479474.1 | R3HCC1        | -0.420028115 |
| ILMN_2554448 | XM_974354.1    | LOC674308     | -0.420095113 |
| ILMN_3040759 | NM_001081264.1 | ALG6          | -0.42010153  |
| ILMN_2593038 | NM_011306.3    | RXRB          | -0.420351511 |
| ILMN_3131522 | NM_020593.2    | FBXO3         | -0.42053277  |

|              |                |               |              |
|--------------|----------------|---------------|--------------|
| ILMN_1256335 | NM_144850.1    | RAPGEF3       | -0.420601698 |
| ILMN_2752867 | NM_025292.2    | SYNJ2BP       | -0.420860572 |
| ILMN_1224368 | NM_008323.1    | IDH3G         | -0.42099683  |
| ILMN_3065164 | NM_009749.1    | BEX2          | -0.421133937 |
| ILMN_1225380 | XM_001473299.1 | LOC100043982  | -0.421499073 |
| ILMN_1256142 | NM_008538.2    | MARCKS        | -0.421514374 |
| ILMN_1244634 | NM_028065.2    | CNPY3         | -0.421515519 |
| ILMN_2968032 | NM_027236.1    | 2010003J03RIK | -0.421566656 |
| ILMN_2676074 | XM_001479341.1 | LOC100047905  | -0.421585548 |
| ILMN_2554549 |                | GSTT2         | -0.421709772 |
| ILMN_1252263 |                | UQCRB         | -0.421872709 |
| ILMN_2724545 | NM_145587.1    | SBK           | -0.422121892 |
| ILMN_1238509 | NM_178017.1    | HMGB2L1       | -0.422161916 |
| ILMN_2879221 | NM_030731.1    | TRIM23        | -0.423094921 |
| ILMN_1257704 |                | 6030458P06RIK | -0.423281236 |
| ILMN_1242011 | NM_173776.2    | 5930431H10    | -0.423998053 |
| ILMN_1235370 |                | ARNT          | -0.424422399 |
| ILMN_1220514 | XM_358357.1    | 9030416H16RIK | -0.424682734 |
| ILMN_3004949 | NM_172921.2    | D930028F11RIK | -0.424919451 |
| ILMN_1254446 |                | 4833426H15RIK | -0.425650626 |
| ILMN_2595822 | NM_011932.2    | DAPP1         | -0.425791585 |
| ILMN_2716069 | XM_001480154.1 | 2310040G24RIK | -0.425853081 |
| ILMN_2510694 | NM_138314.2    | NME7          | -0.425895388 |
| ILMN_1222123 | NM_001025438.1 | CAMK2D        | -0.426261749 |
| ILMN_2856861 | NR_001572.1    | NUDC-PS1      | -0.426691428 |
| ILMN_2732757 | XM_126365.3    | 9830002I17RIK | -0.426789888 |
| ILMN_2705578 | NM_172468.2    | SNX30         | -0.427068842 |
| ILMN_1224092 | NM_007425.2    | AGER          | -0.427250492 |
| ILMN_2630641 | NM_009272.4    | SRM           | -0.427501095 |
| ILMN_1255436 |                | TOP2A         | -0.427534265 |
| ILMN_2698519 | NM_178206.2    | HIST1H3H      | -0.427655162 |
| ILMN_2647372 | NM_172652.3    | 4632411B12RIK | -0.427812358 |
| ILMN_2634083 | NM_007669.3    | CDKN1A        | -0.427832016 |
| ILMN_2621338 | NM_007764.4    | CRKL          | -0.42789245  |
| ILMN_2684205 | XR_002338.2    | 4930431B09RIK | -0.428030582 |
| ILMN_3143557 | NM_134052.2    | ADI1          | -0.428221113 |
| ILMN_2749937 | NM_019825.1    | NCOA6         | -0.428579168 |
| ILMN_2473953 |                | 2810017I02RIK | -0.428731163 |
| ILMN_1222000 | NM_026942.2    | STOML1        | -0.42883306  |
| ILMN_2579432 |                | D430004H20RIK | -0.429109536 |
| ILMN_2432110 | XM_001476916.1 | LOC100046855  | -0.429155551 |
| ILMN_1245979 | XM_355907.1    | LOC381891     | -0.429434534 |
| ILMN_1216122 | NM_198831.2    | MRPL48        | -0.429438615 |
| ILMN_2784272 | NM_008338.2    | IFNGR2        | -0.429577695 |
| ILMN_2933151 | NM_001033172.1 | RAB11FIP2     | -0.429766274 |
| ILMN_2581617 |                | 4930507H06RIK | -0.429884412 |



|              |                |               |              |
|--------------|----------------|---------------|--------------|
| ILMN_2704951 | XM_140308.6    | DCP2          | -0.429945856 |
| ILMN_2747820 | NM_025522.3    | DHRS7         | -0.430106581 |
| ILMN_3162682 | NM_001039373.3 | MTCP1         | -0.430413026 |
| ILMN_2755337 | XM_196763.2    | PRSSL1        | -0.43069624  |
| ILMN_2628822 | NM_011852.2    | OAS1G         | -0.430748    |
| ILMN_1250529 | NM_133246.4    | MS4A3         | -0.431247161 |
| ILMN_1248415 | NM_009443.3    | TGOLN1        | -0.431359645 |
| ILMN_2760835 | NM_053196.3    | SFXN2         | -0.431524534 |
| ILMN_1225125 |                | RSDR1-PENDING | -0.431715466 |
| ILMN_3096750 | NM_001039088.1 | SEH1L         | -0.431745642 |
| ILMN_2860616 | NM_178206.2    | HIST1H3H      | -0.431973387 |
| ILMN_1238573 | XM_204410.2    | LOC278188     | -0.431998048 |
| ILMN_2944784 | NM_153065.2    | DDX27         | -0.432125748 |
| ILMN_1214450 | NM_001081054.2 | QRSL1         | -0.432147477 |
| ILMN_1244866 | NM_153564.2    | GBP5          | -0.432181185 |
| ILMN_1229908 |                | GS2NA-PENDING | -0.432241931 |
| ILMN_1230545 |                | MOBK1B        | -0.432667427 |
| ILMN_3161679 | NM_009250.1    | SERPIN1       | -0.433023372 |
| ILMN_2604894 | NM_133741.1    | SNRK          | -0.433162014 |
| ILMN_1232960 | XM_196313.1    | LOC269515     | -0.433217765 |
| ILMN_2691536 |                | SNX19         | -0.433358649 |
| ILMN_2617820 | NM_008915.2    | PPP3CC        | -0.43356047  |
| ILMN_2741746 | NM_194355.2    | SPIRE1        | -0.433799875 |
| ILMN_2848828 | NM_028815.3    | CEP97         | -0.433963691 |
| ILMN_2673314 | NM_001081164.1 | OTUD4         | -0.434310798 |
| ILMN_1259499 |                | B130065G19RIK | -0.434545449 |
| ILMN_2949605 | NM_026861.2    | UBAC2         | -0.434706789 |
| ILMN_1223812 | NM_026665.2    | CEP57         | -0.434775251 |
| ILMN_2642886 | NM_178709.4    | RNF214        | -0.43480875  |
| ILMN_1224229 | NM_001033400.2 | GM806         | -0.43495255  |
| ILMN_1234265 | NM_153587.2    | RPS6KA5       | -0.43560085  |
| ILMN_1260459 | NM_145626.3    | 2610208M17RIK | -0.436100915 |
| ILMN_1216085 |                | B230387C07RIK | -0.436217748 |
| ILMN_2737171 | NM_018737.4    | CTPS2         | -0.436362003 |
| ILMN_2727921 | NM_009775.3    | TSPO          | -0.43643075  |
| ILMN_2682947 | NM_134101.1    | PSMD2         | -0.436595298 |
| ILMN_1215223 |                | A830081I21RIK | -0.436615789 |
| ILMN_2531225 | NM_207530.2    | OSBPL1A       | -0.436667648 |
| ILMN_2589266 | NM_026422.1    | MRRF          | -0.436671694 |
| ILMN_2451769 | NM_013910.2    | FBXL10        | -0.436767929 |
| ILMN_2540983 | XM_356036.1    | LOC381986     | -0.436843223 |
| ILMN_1221106 |                | E030022B18RIK | -0.436848761 |
| ILMN_1219759 | NM_009210.2    | HLTF          | -0.436909834 |
| ILMN_2535513 | XM_357150.1    | LOC383607     | -0.436996834 |
| ILMN_2673776 | NM_177733.2    | E2F2          | -0.437077238 |
| ILMN_1227627 | NM_025999.1    | RNF141        | -0.43708303  |

|              |                |               |              |
|--------------|----------------|---------------|--------------|
| ILMN_1226382 | XM_355349.1    | LOC381386     | -0.437433981 |
| ILMN_2840091 | NM_011673.2    | UGCG          | -0.437549171 |
| ILMN_1232165 | XM_138691.2    | MGC60742      | -0.437613777 |
| ILMN_1250687 | XM_891654.3    | EG627022      | -0.43835681  |
| ILMN_2725232 | NM_016746.2    | CCNC          | -0.439107469 |
| ILMN_2677393 | NM_177407.3    | CAMK2A        | -0.439479076 |
| ILMN_2635024 | NM_170591.1    | NUPL1         | -0.439599496 |
| ILMN_1242842 | NM_012015.1    | H2AFY         | -0.439938661 |
| ILMN_1215352 | NM_028481.1    | CCDC18        | -0.440019802 |
| ILMN_2553323 |                | 4732471N16RIK | -0.440650981 |
| ILMN_2487554 |                | A330042I21RIK | -0.440729804 |
| ILMN_1246371 | NM_029389.2    | 3110001K24RIK | -0.441010752 |
| ILMN_2454172 |                | E430013K19RIK | -0.441047172 |
| ILMN_2538152 | XM_359067.1    | LOC386094     | -0.441097404 |
| ILMN_2675078 | NM_020012.1    | RNF14         | -0.44126288  |
| ILMN_1227460 |                | 2700089E24RIK | -0.441266842 |
| ILMN_2637113 | NM_177909.2    | SLC9A9        | -0.441313339 |
| ILMN_1249486 | NM_010796.2    | MGL1          | -0.441366527 |
| ILMN_2728997 | XM_001478311.1 | LOC100047028  | -0.441389112 |
| ILMN_2482572 | NM_134080.1    | FLNB          | -0.441786806 |
| ILMN_2784821 | NM_025279.1    | HNRPK         | -0.442141022 |
| ILMN_2648047 | XM_357858.1    | 2010309E21RIK | -0.442945035 |
| ILMN_2597255 | NM_011799.2    | CDC6          | -0.443156281 |
| ILMN_2554301 |                | SLC2A9        | -0.443506485 |
| ILMN_2712635 | NM_008667.2    | NAB1          | -0.444207462 |
| ILMN_2766338 | NM_172517.1    | RBBP5         | -0.444329214 |
| ILMN_2763867 | NM_024454.1    | RAB21         | -0.444347087 |
| ILMN_2621649 | XM_921012.3    | GPR160        | -0.444462067 |
| ILMN_2600720 | NM_029609.1    | 2310007H09RIK | -0.444528384 |
| ILMN_3007271 | NM_178891.4    | PRMT6         | -0.444697752 |
| ILMN_1215898 | NM_172746.2    | HIRIP3        | -0.444802898 |
| ILMN_2535582 | XM_356635.1    | LOC382707     | -0.444966007 |
| ILMN_2879382 | NM_138596.1    | MED10         | -0.444983725 |
| ILMN_2688225 | NM_007406.1    | ADCY7         | -0.444998071 |
| ILMN_2613389 | NM_026344.3    | DPH2          | -0.44524495  |
| ILMN_2526042 | XM_126827.4    | LOC217372     | -0.445274665 |
| ILMN_2666864 | NM_007504.2    | ATP2A1        | -0.445462242 |
| ILMN_2635813 | NM_026497.2    | NUDT12        | -0.445778735 |
| ILMN_3163148 | NM_001039106.2 | DDHD1         | -0.445914162 |
| ILMN_1246011 | XM_978614.1    | WDR70         | -0.446010641 |
| ILMN_3107974 | NM_007970.1    | EZH1          | -0.446344512 |
| ILMN_1236741 | NM_001015876.1 | TYW1          | -0.446346364 |
| ILMN_2652757 | NM_134255.2    | ELOVL5        | -0.446635807 |
| ILMN_2771380 |                | CD52          | -0.446900033 |
| ILMN_1259789 | NM_023507.3    | 0610007P08RIK | -0.446951736 |
| ILMN_2946088 | NM_019482.2    | PANX1         | -0.446991502 |

|              |                |               |              |
|--------------|----------------|---------------|--------------|
| ILMN_1237963 | NM_199035.1    | ALG8          | -0.447129561 |
| ILMN_1225042 | NM_025883.3    | ZDHHC6        | -0.447294535 |
| ILMN_2620539 | NM_175356.1    | PI4KB         | -0.447575139 |
| ILMN_2870302 | NM_145619.2    | PARP3         | -0.447684875 |
| ILMN_2891245 | NM_183163.2    | RHBDL2        | -0.447726801 |
| ILMN_2628672 | NM_026246.3    | MRPL49        | -0.447837505 |
| ILMN_2926729 | NM_019952.1    | CLCF1         | -0.447872113 |
| ILMN_1255324 | XM_982491.2    | EG668831      | -0.448367447 |
| ILMN_2968731 | NM_020282.2    | NQO2          | -0.448507718 |
| ILMN_2617162 | NM_010807.2    | MLP           | -0.448803487 |
| ILMN_1249021 | NM_009741.2    | BCL2          | -0.448939869 |
| ILMN_2750789 | NM_144826.3    | UTP6          | -0.449020664 |
| ILMN_2839973 | NM_178637.1    | KAT5          | -0.44912476  |
| ILMN_1243846 |                | NRF1          | -0.449216207 |
| ILMN_1213138 | NM_025371.2    | ACY1          | -0.449294208 |
| ILMN_2588417 | NM_021555.1    | BRP16         | -0.449340341 |
| ILMN_1243154 | NM_153410.4    | GPSM1         | -0.449570541 |
| ILMN_2610744 | NM_010858.4    | MYL4          | -0.450039001 |
| ILMN_2636685 | NM_173189.2    | MCPH1         | -0.450168818 |
| ILMN_2885016 | NM_007712.1    | CLK2          | -0.450186067 |
| ILMN_2421813 | NM_172483.1    | ZFP180        | -0.450247608 |
| ILMN_1259377 |                | RAB11FIP4     | -0.450498482 |
| ILMN_1242286 | NM_001081213.1 | ERMP1         | -0.450813804 |
| ILMN_2542951 | XM_129260.1    | PANK          | -0.450929228 |
| ILMN_1222627 | NM_001005426.1 | ZCWPW1        | -0.451130289 |
| ILMN_2606295 | NM_008102.3    | GCH1          | -0.451243599 |
| ILMN_2548831 |                | 5830418G11RIK | -0.451325448 |
| ILMN_2657844 | NM_007659.3    | CDC2A         | -0.451844414 |
| ILMN_1228320 | NM_008823.3    | CFP           | -0.451847511 |
| ILMN_1234257 | NM_027901.2    | GTF3C2        | -0.451926469 |
| ILMN_2668608 | NM_016676.4    | RAB10         | -0.452047275 |
| ILMN_3076864 | NM_008541.2    | SMAD5         | -0.452109477 |
| ILMN_2783519 | NM_007381.2    | ACADL         | -0.452174187 |
| ILMN_2994806 | NM_177688.2    | H2AFJ         | -0.452294388 |
| ILMN_2630909 | NM_028274.2    | EXOSC6        | -0.45231079  |
| ILMN_2632206 | NM_022000.2    | GNAS          | -0.452366799 |
| ILMN_2649801 | NM_145353.1    | YIPF3         | -0.45247045  |
| ILMN_2606436 | NM_019670.1    | DIAP3         | -0.452574336 |
| ILMN_1249029 |                | 9830166G06RIK | -0.452783489 |
| ILMN_2456776 | NM_001003908.1 | CLTC          | -0.452814024 |
| ILMN_1223734 | NM_009716.2    | ATF4          | -0.45291157  |
| ILMN_1241371 | NM_001038614.1 | OLFM1         | -0.453268093 |
| ILMN_2768330 | NM_007935.1    | EPC1          | -0.453350148 |
| ILMN_3111744 | NM_172950.2    | LPIN1         | -0.453396382 |
| ILMN_2812244 | NM_172630.1    | MPPE1         | -0.453467753 |
| ILMN_2670313 | XM_203572.3    | 0610010F05RIK | -0.453661007 |

|              |                |                |              |
|--------------|----------------|----------------|--------------|
| ILMN_1252122 | NM_001033422.1 | THOC2          | -0.453793687 |
| ILMN_2888713 | NM_009187.1    | COX7A2L        | -0.453970211 |
| ILMN_2690976 | NM_009870.2    | CDK4           | -0.454154276 |
| ILMN_2657066 | NM_029337.2    | EP400          | -0.454156287 |
| ILMN_2678724 | NM_022019.4    | DUSP10         | -0.454171749 |
| ILMN_1244761 |                | PGLS           | -0.454612321 |
| ILMN_2733524 | NM_134122.2    | NRM            | -0.454628242 |
| ILMN_1239173 | XM_892769.2    | EG628040       | -0.454688935 |
| ILMN_1260372 | NM_013753.1    | X99384         | -0.454751339 |
| ILMN_1220923 |                | 2700069A02RIK  | -0.454838885 |
| ILMN_2613303 | NM_030147.2    | BRD8           | -0.454900861 |
| ILMN_1236391 | NM_146169.1    | PAIP2B         | -0.454916936 |
| ILMN_2643832 | NM_008014.3    | PPM1G          | -0.455234669 |
| ILMN_2896582 | NM_026998.2    | SNX6           | -0.455307584 |
| ILMN_2547737 | NM_172464.2    | DAAM1          | -0.455333356 |
| ILMN_2507890 | NM_153065.3    | DDX27          | -0.455531587 |
| ILMN_1233726 | NM_133244.2    | PLEKHK1        | -0.455565661 |
| ILMN_3019002 | NM_001080387.1 | FUSIP1         | -0.455930676 |
| ILMN_2832979 | NM_016697.2    | GPC3           | -0.455955578 |
| ILMN_1228489 |                | HMG20A         | -0.456124089 |
| ILMN_1212849 |                | 9630050A07RIK  | -0.456124827 |
| ILMN_2648648 | NM_172149.4    | BNIP1          | -0.45618131  |
| ILMN_1220084 | NM_145851.2    | CABLES2        | -0.456316351 |
| ILMN_2911102 | NM_008444.2    | KIF3B          | -0.456554537 |
| ILMN_1252089 |                | NFATC3         | -0.456682542 |
| ILMN_1239446 | NM_145223.2    | ALMS1          | -0.456685829 |
| ILMN_2853658 | NM_134058.1    | PELO           | -0.457070949 |
| ILMN_2726030 | NM_133237.1    | AB023957       | -0.457290181 |
| ILMN_2704900 | NM_001025296.1 | DFFA           | -0.457349571 |
| ILMN_1251151 |                | POLE           | -0.457381206 |
| ILMN_2997763 | NM_010475.1    | HSD17B1        | -0.457495224 |
| ILMN_2471045 | NM_021322.1    | WDR4           | -0.458060578 |
| ILMN_3111383 | NM_001081150.1 | LONRF1         | -0.458390052 |
| ILMN_2945472 | NM_025371.1    | ACY1           | -0.458594232 |
| ILMN_2664593 | NM_020034.1    | HIST1H1B       | -0.458899209 |
| ILMN_2682945 | NM_134101.1    | PSMD2          | -0.458981587 |
| ILMN_3064401 | NM_027121.3    | VKORC1L1       | -0.459062654 |
| ILMN_1246301 | BC019166.1     | SCL0002275.1_1 | -0.459118205 |
| ILMN_2700126 | NM_145760.2    | ARFGAP1        | -0.459280784 |
| ILMN_2933530 | NM_027475.1    | ECD            | -0.459543278 |
| ILMN_1239632 | NM_023893.3    | NG23           | -0.459823856 |
| ILMN_3108894 | NM_133220.2    | SGK3           | -0.460222281 |
| ILMN_1253919 | NM_011337.2    | CCL3           | -0.460488027 |
| ILMN_1251771 | NM_025567.2    | CYC1           | -0.460545001 |
| ILMN_2744036 | NM_175403.2    | 2410014A08RIK  | -0.460809357 |
| ILMN_1232532 | NM_025739.2    | RNF220         | -0.461006713 |

|              |                |               |                   |
|--------------|----------------|---------------|-------------------|
| ILMN_2505095 |                | USP48         | -0.46145952       |
| ILMN_2758631 | NM_008612.1    | MNAT1         | -0.461526485      |
| ILMN_1226073 |                | TRPS1         | -0.461660425      |
| ILMN_1258334 | NM_144884.1    | TOR1A         | -0.462047267      |
| ILMN_2647873 | NM_173437.1    | NAV1          | -0.462420641      |
| ILMN_1259339 | NM_009871.2    | CDK5R1        | -0.462437548      |
| ILMN_2724643 | NM_178601.2    | IMP4          | -0.462880011      |
| ILMN_2790486 | NM_009725.2    | ATP5F1        | -0.463060828      |
| ILMN_1254526 | NM_080708.1    | BMP2K         | -0.463183219      |
| ILMN_2697719 | NM_001099631.1 | SH2D5         | -0.463260638      |
| ILMN_2820814 | NM_025706.2    | TBC1D15       | -0.46326389       |
| ILMN_1252743 |                | MRPL15        | -0.463704762      |
| ILMN_2421299 | NM_021559.2    | ZFP191        | -0.463710071      |
| ILMN_3148662 | NM_001079695.1 | SFRS5         | -0.464241314      |
| ILMN_2879921 | NM_177201.2    | PHF8          | -0.464390387      |
| ILMN_1245421 | NM_138756.4    | SLC25A36      | -0.464667761      |
| ILMN_2677046 | NM_013541.1    | GSTP1         | -0.464826383      |
| ILMN_1212989 | XM_001476780.1 | LOC100046770  | -0.465015194      |
| ILMN_2451662 | XM_127016.2    | ZFP50         | -0.465033627      |
| ILMN_1255439 | NM_144800.1    | MTSS1         | -0.465398098      |
| ILMN_2747196 | NM_007656.4    | CD82          | -0.465606688      |
| ILMN_3112185 | NM_019561.2    | ENSA          | -0.466032241      |
| ILMN_2646976 | NM_020566.1    | DNAJC4        | -0.466191254      |
| ILMN_2669813 | NM_133865.2    | DCLRE1B       | -0.466628555      |
| ILMN_1233637 | XM_485288.3    | EG433633      | -0.46663065       |
| ILMN_1230452 | XM_356277.1    | LOC382175     | -0.467166345      |
| ILMN_2815313 | NM_013836.2    | TCF20         | -0.4672206        |
| ILMN_2646574 | NM_009173.1    | SIAH1B        | -0.46738711       |
| ILMN_2504718 | NM_030684.1    | TRIM34        | -0.467919483      |
| ILMN_1217556 | NM_001024604.2 | ANKRD28       | -0.467928197      |
| ILMN_2679851 | NM_008810.2    | PDHA1         | -0.467959188      |
| ILMN_2562107 |                | USP14         | -0.468068405      |
| ILMN_2771441 | NM_173764.3    | TAPT1         | -0.468237329      |
| ILMN_2636755 | NM_012055.3    | ASNS          | -0.46838985       |
| ILMN_1249836 | NM_053102.2    |               | Sep15 -0.46853628 |
| ILMN_2553783 |                | 5830434K11RIK | -0.468882789      |
| ILMN_1220051 | NM_001080130.1 | TMPO          | -0.469276302      |
| ILMN_2685873 | NM_153167.2    | WDR32         | -0.469501161      |
| ILMN_2674906 | NM_021719.3    | CLDN15        | -0.469656919      |
| ILMN_3124947 | NM_001012330.1 | ZFP238        | -0.469747698      |
| ILMN_1250752 |                | KNSL5         | -0.469866523      |
| ILMN_2634933 | NM_145826.4    | IL17RE        | -0.470171475      |
| ILMN_1244874 | NM_009304.1    | SYNGR2        | -0.470233281      |
| ILMN_2556329 | NM_026231.2    | GSTCD         | -0.470407164      |
| ILMN_1218732 | XM_148728.1    | 2810426P10RIK | -0.47058844       |
| ILMN_2938390 | NM_027184.1    | IPMK          | -0.470967074      |

|              |                |               |              |
|--------------|----------------|---------------|--------------|
| ILMN_2540655 | XM_357784.1    | LOC384675     | -0.47099284  |
| ILMN_2642403 | NM_010723.2    | LMO4          | -0.471075389 |
| ILMN_2439322 | NM_019747.3    | ZFP113        | -0.471102273 |
| ILMN_2600339 | NM_019650.2    | GOSR2         | -0.471111125 |
| ILMN_1246030 |                | 4732431J01RIK | -0.471148086 |
| ILMN_1239750 |                | BRCA1         | -0.471217557 |
| ILMN_1246058 | NM_031868.2    | PPP1CA        | -0.471333077 |
| ILMN_3115777 | NM_001038700.1 | FNBP1         | -0.471648671 |
| ILMN_1239221 | NM_023516.3    | 2310016C08RIK | -0.471898161 |
| ILMN_2742068 | NM_013808.3    | CSRP3         | -0.472383649 |
| ILMN_3048503 | NM_027707.2    | NIPBL         | -0.472388611 |
| ILMN_2671447 | NM_011232.2    | RAD1          | -0.472430975 |
| ILMN_2763235 | NM_177300.2    | B130040O20RIK | -0.472599542 |
| ILMN_2757607 | NM_001083928.1 | TLE3          | -0.472667956 |
| ILMN_2510771 |                | 2810453I06RIK | -0.473512359 |
| ILMN_1219869 | NM_008357.1    | IL15          | -0.473685369 |
| ILMN_1236150 | NM_009680.2    | AP3B1         | -0.473711106 |
| ILMN_2695228 | NM_026050.1    | 2810453I06RIK | -0.474240757 |
| ILMN_2522495 |                | C130078N17RIK | -0.474308443 |
| ILMN_1228814 |                | 2610524N02RIK | -0.474350663 |
| ILMN_2708440 | NM_018875.1    | SNX12         | -0.474656625 |
| ILMN_2515768 | NM_145436.2    | CDC27         | -0.474892682 |
| ILMN_2498813 | NM_001024205.1 | NUFIP2        | -0.475157471 |
| ILMN_1256066 |                | SNX19         | -0.475459154 |
| ILMN_2574997 |                | A630024K09RIK | -0.475523517 |
| ILMN_2568028 |                | IL2RG         | -0.475564087 |
| ILMN_3051466 | NM_001025597.1 | IKZF1         | -0.475622905 |
| ILMN_3133267 | NM_198122.1    | ARID4B        | -0.475760325 |
| ILMN_1242474 | NM_144538.2    | RAB3IL1       | -0.47580821  |
| ILMN_1248202 |                | ARHGEF2       | -0.476029037 |
| ILMN_1238389 | NM_001024919.1 | 2310022M17RIK | -0.477389364 |
| ILMN_2995537 | NM_008163.3    | GRB2          | -0.477392568 |
| ILMN_2728634 | NM_010718.3    | LIMK2         | -0.477924489 |
| ILMN_1256698 | XM_917905.3    | WDR43         | -0.477961788 |
| ILMN_1228261 |                | A130032P05RIK | -0.47821223  |
| ILMN_1255860 | NM_010654.2    | KLRD1         | -0.478247948 |
| ILMN_2648661 | NM_007598.2    | CAP1          | -0.478269237 |
| ILMN_1213185 | XM_358947.1    | LOC385792     | -0.4784247   |
| ILMN_1227033 | NM_001081210.1 | MRPL44        | -0.478548499 |
| ILMN_1256645 |                | ZFPN1A1       | -0.478677811 |
| ILMN_1236417 | NM_009547.2    | ZFP161        | -0.478743963 |
| ILMN_2677712 | NM_007480.1    | ARF5          | -0.478842439 |
| ILMN_2641270 | NM_001024512.1 | FAM149B       | -0.478916174 |
| ILMN_2658554 | NM_030678.3    | GYS1          | -0.478946267 |
| ILMN_2730926 | NM_172947.3    | LSM12         | -0.479360262 |
| ILMN_1219568 | NM_016881.2    | PMM2          | -0.479385692 |

|              |                |                 |              |
|--------------|----------------|-----------------|--------------|
| ILMN_2444505 | NM_145538.1    | SCL0003251.1_21 | -0.479425028 |
| ILMN_1256708 | XM_137290.1    | LOC237459       | -0.479563974 |
| ILMN_2696610 | NM_026331.3    | SLC25A37        | -0.479620967 |
| ILMN_1224072 | NM_201245.2    | MPRIP           | -0.479792576 |
| ILMN_3141830 | NM_018768.2    | STX8            | -0.480854838 |
| ILMN_2940766 | NM_026422.1    | MRRF            | -0.481089263 |
| ILMN_1237730 |                | RAF1            | -0.481271981 |
| ILMN_3083981 | NM_001080949.1 | TTC5            | -0.481735069 |
| ILMN_3009860 | NM_011346.1    | SELL            | -0.482137337 |
| ILMN_2770759 | NM_183417.2    | CDK2            | -0.482140191 |
| ILMN_1232099 | NM_019793.2    | TSPAN3          | -0.482349985 |
| ILMN_2511089 |                | UGCG            | -0.48237491  |
| ILMN_2639714 | NM_030197.1    | 2700078E11RIK   | -0.482484483 |
| ILMN_2621038 | NM_010455.2    | HOXA7           | -0.482500643 |
| ILMN_2678431 | NM_008613.2    | MNS1            | -0.482508205 |
| ILMN_1241908 | NM_153592.1    | ERLIN2          | -0.482969545 |
| ILMN_2742498 | NM_172394.2    | NUP88           | -0.483116881 |
| ILMN_2918114 | NM_009687.1    | APEX1           | -0.484217706 |
| ILMN_1214075 | NM_026039.2    | MED18           | -0.484524011 |
| ILMN_2985969 | NM_009773.1    | BUB1B           | -0.484538194 |
| ILMN_1233334 | NM_010236.1    | FPGS            | -0.48460071  |
| ILMN_3127790 | NM_001025597.1 | IKZF1           | -0.484828709 |
| ILMN_2719473 | NM_024184.2    | ASF1B           | -0.485019781 |
| ILMN_2654822 | NM_145979.2    | CHD4            | -0.485076398 |
| ILMN_2644061 | NM_177325.3    | TSR1            | -0.485337222 |
| ILMN_2771824 | NM_001039176.1 | ELOVL1          | -0.485379105 |
| ILMN_1217855 | NM_024253.4    | NKG7            | -0.485477849 |
| ILMN_2729958 | NM_178204.1    | HIST1H3D        | -0.485608585 |
| ILMN_2525395 | NM_001081340.1 | SETD2           | -0.485845696 |
| ILMN_2888834 | NM_138310.1    | APOB48R         | -0.486036905 |
| ILMN_2757699 | NM_025371.2    | ACY1            | -0.486044895 |
| ILMN_2663679 | NM_026971.2    | MRPL48          | -0.486243244 |
| ILMN_1238130 | NM_018740.1    | RAI12           | -0.486344582 |
| ILMN_2433964 | NM_031408.2    | GIGYF1          | -0.486481685 |
| ILMN_2637398 | NM_026073.2    | RABL5           | -0.486967541 |
| ILMN_2658827 | NM_139299.1    | IL31RA          | -0.48703389  |
| ILMN_2644664 | NM_198164.2    | CDC2L6          | -0.48706775  |
| ILMN_2583102 |                | D430007J11RIK   | -0.487172828 |
| ILMN_1255869 |                | CATNB           | -0.487407995 |
| ILMN_2875169 | NM_144905.2    | 6330416G13RIK   | -0.487815892 |
| ILMN_1255592 | NM_019460.1    | SFMBT1          | -0.488590201 |
| ILMN_2981486 | NM_053154.1    | KLRA19          | -0.488977585 |
| ILMN_2745971 | NM_011793.2    | BANF1           | -0.489528324 |
| ILMN_1228091 | NM_175045.2    | BCOR            | -0.490049698 |
| ILMN_2788475 | NM_011505.1    | STXBP4          | -0.490093389 |
| ILMN_2736209 | NM_207234.2    | REXO4           | -0.490115571 |

|              |                |                 |              |
|--------------|----------------|-----------------|--------------|
| ILMN_2875251 | NM_007447.2    | ANG             | -0.490396202 |
| ILMN_2736783 | NM_177715.4    | KCTD12          | -0.490443667 |
| ILMN_1258028 | NM_016922.2    | GAL3ST1         | -0.49094672  |
| ILMN_1240950 | NM_146144.2    | USP1            | -0.491345881 |
| ILMN_1214811 | NM_008943.1    | PSEN1           | -0.491413025 |
| ILMN_2431150 |                | EEF2K           | -0.491741545 |
| ILMN_2883016 | NM_173437.1    | NAV1            | -0.492100492 |
| ILMN_1253005 | XM_357015.1    | LOC383371       | -0.492279805 |
| ILMN_2431046 | NM_133835.1    | UBAC1           | -0.492323042 |
| ILMN_2636110 | NM_199007.1    | SGOL2           | -0.492770379 |
| ILMN_2595732 | XM_001475817.1 | LOC100046232    | -0.4928488   |
| ILMN_2524167 | XM_130859.4    | 4631434O19RIK   | -0.492995872 |
| ILMN_2437558 | BC026739.1     | SCL0004175.1_57 | -0.493319817 |
| ILMN_2637052 | NM_009010.2    | RAD23A          | -0.493833515 |
| ILMN_1257573 | NM_026856.2    | ZFP644          | -0.49393386  |
| ILMN_1252216 | NM_011251.1    | RBM6            | -0.494327383 |
| ILMN_2671755 | NM_207298.2    | CERCAM          | -0.494490286 |
| ILMN_3077377 | NM_011710.2    | WARS            | -0.494525575 |
| ILMN_1221700 | NM_015779.2    | ELA2            | -0.494692714 |
| ILMN_2892480 | NM_172639.1    | 5330431N19RIK   | -0.494752341 |
| ILMN_2672847 | NM_080288.1    | ELMO1           | -0.495091807 |
| ILMN_2759365 | NM_020581.1    | ANGPTL4         | -0.495452889 |
| ILMN_2641360 | NM_001033966.3 | AK2             | -0.495460955 |
| ILMN_2549903 |                | 6230401I02RIK   | -0.495501397 |
| ILMN_2659229 | NM_009079.2    | RPL22           | -0.495648649 |
| ILMN_1218959 | NM_138598.5    | D11WSU99E       | -0.49630383  |
| ILMN_1251005 | NM_026942.2    | STOML1          | -0.496340951 |
| ILMN_3145527 | NM_001042620.1 | DHX15           | -0.496420858 |
| ILMN_2492864 | NM_001039939.1 | ASXL1           | -0.496694214 |
| ILMN_2694430 |                | 1110033K02RIK   | -0.497165295 |
| ILMN_1237028 | NM_145537.1    | EDEM2           | -0.497544212 |
| ILMN_2778195 | NM_008697.2    | NIN             | -0.497655596 |
| ILMN_1258534 | NM_013477.3    | ATP6VOD1        | -0.497700209 |
| ILMN_2505319 | NM_022964.2    | WBSCR5          | -0.497799266 |
| ILMN_1236246 | NM_138590.2    | D4WSU132E       | -0.498082877 |
| ILMN_1253145 | NM_001025263.1 | TPD52           | -0.49812164  |
| ILMN_2645439 | NM_007552.4    | BMI1            | -0.498162006 |
| ILMN_1231802 | NM_029745.2    | TBC1D9B         | -0.498201189 |
| ILMN_2859032 | NM_001033399.1 | GFOD1           | -0.498212493 |
| ILMN_1256824 | NM_173398.2    | GPR171          | -0.498254911 |
| ILMN_2481170 | NM_028075.2    | TNFRSF13C       | -0.498490676 |
| ILMN_2981783 | NM_019455.2    | PTGDS2          | -0.499180904 |
| ILMN_1231307 | XR_033301.1    | LOC666025       | -0.499411261 |
| ILMN_1217842 | NM_011792.4    | BACE1           | -0.499625898 |
| ILMN_2556132 |                | 9430077D24RIK   | -0.499702638 |
| ILMN_2650868 | NM_172625.2    | INO80C          | -0.500001608 |



|              |                |               |              |
|--------------|----------------|---------------|--------------|
| ILMN_2534975 | NM_030116.2    | MRPL9         | -0.500130516 |
| ILMN_2722438 | NM_007634.2    | CCNF          | -0.500291577 |
| ILMN_2703023 | NM_028715.2    | FCHO1         | -0.500304225 |
| ILMN_1231651 | XM_001474279.1 | LOC100045439  | -0.500609706 |
| ILMN_2733793 | NM_009898.2    | CORO1A        | -0.500690143 |
| ILMN_2925895 | NM_145466.1    | A2LD1         | -0.500804149 |
| ILMN_1228707 | XM_283936.2    | 5730406M06RIK | -0.501059329 |
| ILMN_1230077 | NM_025345.2    | 0610037P05RIK | -0.501167886 |
| ILMN_2704199 | NM_175246.3    | SNIP1         | -0.50125383  |
| ILMN_1255648 | NM_007782.1    | CSF3R         | -0.501314447 |
| ILMN_2596713 | NM_010241.1    | AKTIP         | -0.50136195  |
| ILMN_2600348 | NM_009270.3    | SQLE          | -0.50149802  |
| ILMN_2980663 | NM_007472.1    | AQP1          | -0.501619465 |
| ILMN_2536832 | XR_035280.1    | 9530048O09RIK | -0.501696923 |
| ILMN_2733615 | XM_358374.1    | AP3B2         | -0.50219021  |
| ILMN_2611022 | NM_021399.2    | BCL11B        | -0.502263906 |
| ILMN_2680540 | NM_011829.2    | IMPDH1        | -0.502411457 |
| ILMN_1250779 |                | 5730543M03RIK | -0.502534489 |
| ILMN_2742680 |                | SMARCA3       | -0.502813403 |
| ILMN_3123303 | NM_133915.2    | PXN           | -0.502925605 |
| ILMN_3102376 | NM_001077189.1 | FCGR2B        | -0.502988291 |
| ILMN_1259631 | NM_001035854.2 | AP2B1         | -0.503230757 |
| ILMN_2612044 | NM_145462.1    | D14ERTD500E   | -0.503440921 |
| ILMN_2432040 | NM_198416.2    | ZZZ3          | -0.503461866 |
| ILMN_3072839 | NM_027554.2    | USP38         | -0.503700916 |
| ILMN_2979430 | NM_001080969.1 | THG1L         | -0.503771238 |
| ILMN_2541591 |                | MSL2          | -0.504011455 |
| ILMN_2693115 | XM_907090.2    | 4930579G24RIK | -0.50409092  |
| ILMN_2460062 | NM_019717.2    | ATL2          | -0.504325524 |
| ILMN_1213921 | XM_912265.2    | TROAP         | -0.504341277 |
| ILMN_2424721 |                | PDGFA         | -0.504398858 |
| ILMN_1225204 | NM_021384.3    | RSAD2         | -0.504411359 |
| ILMN_1214678 | NM_001081191.1 | EML5          | -0.504497326 |
| ILMN_2612090 |                | 2610034E13RIK | -0.5054046   |
| ILMN_2603834 | NM_016865.2    | HTATIP2       | -0.505426317 |
| ILMN_2497395 |                | 9130004J05RIK | -0.505428016 |
| ILMN_3098616 | NR_002322.1    | TUG1          | -0.505492574 |
| ILMN_2725672 | NM_011806.2    | DMTF1         | -0.506157707 |
| ILMN_2652482 | NM_018769.3    | DFNA5H        | -0.506436192 |
| ILMN_2774882 |                | 1110005F07RIK | -0.506765638 |
| ILMN_2648742 | NM_008830.1    | ABCB4         | -0.50736858  |
| ILMN_2675738 |                | C730026E21RIK | -0.507628604 |
| ILMN_1242689 | XM_135639.2    | LOC236371     | -0.507676713 |
| ILMN_1218015 | NM_145576.1    | ZFP212        | -0.507700027 |
| ILMN_2630975 | NM_010273.3    | GDI1          | -0.507751315 |
| ILMN_2995698 | NM_026456.2    | TCEB1         | -0.507930126 |

|              |                |               |              |
|--------------|----------------|---------------|--------------|
| ILMN_1231982 |                | 4833409J19RIK | -0.50796572  |
| ILMN_2480963 | NM_010808.3    | MMP24         | -0.508292172 |
| ILMN_2920309 | NM_025873.1    | TRIT1         | -0.508378761 |
| ILMN_2705331 | NM_144858.1    | DUS3L         | -0.509076271 |
| ILMN_1254736 | NM_010864.2    | MYO5A         | -0.509430878 |
| ILMN_2661458 | NM_013676.1    | SUPT5H        | -0.50980165  |
| ILMN_2719803 | NM_019992.3    | STAP1         | -0.509876967 |
| ILMN_2673601 | NM_172716.4    | PCGF3         | -0.50994153  |
| ILMN_1212720 | NM_080469.2    | PRNPIP1       | -0.509970055 |
| ILMN_2947369 | NM_021529.3    | PPP2R3C       | -0.510764158 |
| ILMN_2531554 | XM_355145.1    | LOC381212     | -0.510806557 |
| ILMN_2718349 | NM_177298.2    | 9030221M09RIK | -0.510883879 |
| ILMN_1256245 | XM_900557.2    | RLF           | -0.510884188 |
| ILMN_1239776 | XM_001474366.1 | LOC100040243  | -0.511216693 |
| ILMN_1247561 |                | PDHB          | -0.51140291  |
| ILMN_2687534 | NM_018888.2    | UQCC          | -0.511472211 |
| ILMN_1255741 | NM_194444.1    | CDK10         | -0.511616231 |
| ILMN_1213457 | NM_029721.1    | SNX27         | -0.511934575 |
| ILMN_2878979 | NM_027206.1    | TNFAIP8L2     | -0.512032801 |
| ILMN_2780316 | NM_145417.1    | RNPEP         | -0.512650122 |
| ILMN_2840296 | NM_021498.2    | POLE3         | -0.512905594 |
| ILMN_2743985 | XM_135413.4    | METTL4        | -0.512978492 |
| ILMN_2927635 | NM_001030014.2 | MCAT          | -0.513056596 |
| ILMN_2455447 |                | A930026I22RIK | -0.513304085 |
| ILMN_2746283 | NM_194464.2    | MRVI1         | -0.513374146 |
| ILMN_2505096 | XM_001052064.2 | LOC674195     | -0.51341735  |
| ILMN_1247603 | NM_145413.4    | FAM20B        | -0.513709202 |
| ILMN_2607951 | NM_025325.2    | HAAO          | -0.513782539 |
| ILMN_2697652 | NM_145979.2    | CHD4          | -0.514907639 |
| ILMN_1236369 | NM_011669.3    | USP12         | -0.515218011 |
| ILMN_2749719 | XR_035133.1    | 4930515G01RIK | -0.515224388 |
| ILMN_1226829 | NM_010740.3    | CD93          | -0.515227746 |
| ILMN_2573159 |                | D130047L08RIK | -0.51537919  |
| ILMN_2955214 | NM_199197.1    | 1110032A13RIK | -0.515380803 |
| ILMN_2748337 | NM_023502.1    | ELF2          | -0.515422543 |
| ILMN_2646381 | NM_207669.1    | GABPB1        | -0.515626197 |
| ILMN_2810405 | NM_178440.2    | MYO1G         | -0.516155974 |
| ILMN_1250054 | NM_009048.1    | REPS1         | -0.516378251 |
| ILMN_2527003 | XM_355290.1    | LOC381332     | -0.516389312 |
| ILMN_1246329 | NM_009733.1    | AXIN1         | -0.516418184 |
| ILMN_1229797 |                | GABPB1        | -0.51647209  |
| ILMN_1224842 | XM_358030.1    | LOC385068     | -0.516663513 |
| ILMN_1252267 | NM_138757.2    | 4933424B01RIK | -0.516668755 |
| ILMN_2603918 | NM_007711.2    | CLCN3         | -0.516798429 |
| ILMN_2564279 |                | A930021K20RIK | -0.516953244 |
| ILMN_2661523 | NM_008339.1    | CD79B         | -0.516991509 |

|              |                |                  |              |
|--------------|----------------|------------------|--------------|
| ILMN_1250392 | XM_987106.1    | LOC435145        | -0.517291974 |
| ILMN_3161617 | NM_001033244.2 | FANCD2           | -0.517643264 |
| ILMN_1237983 | NM_008812.1    | PADI2            | -0.517672977 |
| ILMN_1218627 | NM_027457.4    | 5730437N04RIK    | -0.518090526 |
| ILMN_1246247 | NM_001013608.1 | 9330134C04RIK    | -0.518795219 |
| ILMN_2427777 | XM_282969.7    | 4631424J17RIK    | -0.518893718 |
| ILMN_2614970 | NM_011487.3    | STAT4            | -0.518904305 |
| ILMN_1255255 | NM_146229.2    | DYNC1LI1         | -0.519402544 |
| ILMN_2668243 | NM_019648.3    | METAP2           | -0.520236488 |
| ILMN_2742160 | NM_010376.3    | H13              | -0.520253232 |
| ILMN_2662728 | NM_015750.2    | NEU2             | -0.520476402 |
| ILMN_2679984 | NM_011774.2    | SLC30A4          | -0.520906783 |
| ILMN_2573401 |                | C430026P20RIK    | -0.521070326 |
| ILMN_3123826 | NM_001039388.1 | WDR37            | -0.521506991 |
| ILMN_3119014 | NM_205536.1    | ELK3             | -0.521584342 |
| ILMN_2460653 | NM_019449.1    | UNC93B1          | -0.521760647 |
| ILMN_1235447 | NM_001033367.3 | NLRC4            | -0.521942346 |
| ILMN_2830661 | NM_011623.1    | TOP2A            | -0.52199368  |
| ILMN_1259566 | NM_011373.2    | ST6GALNAC4       | -0.522540589 |
| ILMN_2718350 | NM_177298.2    | 9030221M09RIK    | -0.522593721 |
| ILMN_2692942 | NM_009229.2    | SNTB2            | -0.522649856 |
| ILMN_2776075 | NM_025494.1    | ATP6V1C1         | -0.523113525 |
| ILMN_1242482 |                | 4833412N02RIK    | -0.523243006 |
| ILMN_1237695 | NM_019703.3    | PFKP             | -0.523300753 |
| ILMN_1229544 | XM_001476596.1 | LOC100041569     | -0.52342886  |
| ILMN_1239627 | NM_029935.4    | 4631426J05RIK    | -0.523661075 |
| ILMN_2615096 | NM_010074.2    | DPP4             | -0.523782819 |
| ILMN_2644792 | NM_027541.4    | PRPF3            | -0.524184349 |
| ILMN_1250502 |                | C030044K08RIK    | -0.524287056 |
| ILMN_1260417 |                | 4732423C17RIK    | -0.52430841  |
| ILMN_2718266 | NM_010220.2    | FKBP5            | -0.524428084 |
| ILMN_2599615 | NM_025516.4    | ERGIC3           | -0.52442856  |
| ILMN_2528453 | NM_207131.1    | CEBPE            | -0.524494003 |
| ILMN_2591823 | NM_010067.3    | TRDMT1           | -0.524584666 |
| ILMN_2691469 | NM_178914.3    | SPATA7           | -0.525088986 |
| ILMN_2662527 | NM_011465.3    | SPNA1            | -0.525449756 |
| ILMN_3114998 | NM_001008549.1 | BC043301         | -0.525849615 |
| ILMN_2633872 | NM_194444.1    | CDK10            | -0.525897299 |
| ILMN_2705849 | NM_011933.1    | DECR2            | -0.52612566  |
| ILMN_2652104 | NM_177389.3    | MIA3             | -0.526353415 |
| ILMN_2776910 | NM_025283.3    | MOBKL3           | -0.526377944 |
| ILMN_2426571 |                | SCL0004040.1_123 | -0.526512314 |
| ILMN_1221919 | NM_007711.2    | CLCN3            | -0.526516638 |
| ILMN_2819558 | NM_007521.2    | BACH2            | -0.526540699 |
| ILMN_3159029 | NM_080453.2    | MMP28            | -0.526794452 |
| ILMN_1239119 | NM_197944.1    | HSH2D            | -0.526888454 |

|              |                |                |              |
|--------------|----------------|----------------|--------------|
| ILMN_2638428 | NM_009875.3    | CDKN1B         | -0.527023627 |
| ILMN_3070951 | NM_026195.1    | ATIC           | -0.52712467  |
| ILMN_1255053 | NM_011121.3    | PLK1           | -0.527812261 |
| ILMN_1231309 | NM_008534.2    | LY9            | -0.527938611 |
| ILMN_1218533 |                | A630054M16RIK  | -0.527979559 |
| ILMN_1235635 | NM_023908.2    | SLCO3A1        | -0.528490584 |
| ILMN_2703263 |                | RABGGTB        | -0.529137668 |
| ILMN_1246483 | NM_026528.1    | 2700060E02RIK  | -0.529145668 |
| ILMN_1256774 | NM_133758.2    | USP47          | -0.529420418 |
| ILMN_2690319 | NM_175554.3    | CLSPN          | -0.529478949 |
| ILMN_1251971 | XM_150021.1    | 5830432E09RIK  | -0.529656455 |
| ILMN_2736197 | XM_921606.2    | 2610307O08RIK  | -0.529724803 |
| ILMN_2925094 | NM_010824.1    | MPO            | -0.529758659 |
| ILMN_2778789 | NM_144906.1    | SGIP1          | -0.530091241 |
| ILMN_2661635 | NM_013755.2    | GYG            | -0.530304286 |
| ILMN_2667369 | NM_022305.3    | B4GALT1        | -0.530618221 |
| ILMN_2419777 |                | PPM1L          | -0.531364447 |
| ILMN_2617071 | NM_198654.2    | NSL1           | -0.531653276 |
| ILMN_1245003 | NM_013615.2    | ODF2           | -0.531732171 |
| ILMN_1259612 | XM_908501.3    | PFAS           | -0.531750096 |
| ILMN_2758632 | NM_008612.2    | MNAT1          | -0.531856125 |
| ILMN_1223335 | NM_133979.2    | ANO10          | -0.532032575 |
| ILMN_2545897 | NM_024460.3    | 2310016E02RIK  | -0.532229417 |
| ILMN_3154129 | NM_001081203.1 | SBNO1          | -0.532470705 |
| ILMN_2784019 | NM_010283.1    | GGTA1          | -0.532582    |
| ILMN_2819841 | NM_013721.2    | RPL7A          | -0.532620811 |
| ILMN_2732877 | NM_025969.3    | 1700034H14RIK  | -0.532678525 |
| ILMN_1241308 | AK028023.1     | SCL0003749.1_1 | -0.532833695 |
| ILMN_1240671 | XM_356133.1    | LOC382058      | -0.532954076 |
| ILMN_2651575 | NM_010511.2    | IFNGR1         | -0.533310227 |
| ILMN_1213448 | XM_976371.1    | LOC669658      | -0.533531279 |
| ILMN_2666935 | NM_001085518.1 | RP23-357I14.1  | -0.533720547 |
| ILMN_2538615 | XM_355666.1    | LOC381691      | -0.533777129 |
| ILMN_2747735 | NM_133704.4    | SEC22A         | -0.534135807 |
| ILMN_2636360 | NM_026381.3    | SCOTIN         | -0.534717471 |
| ILMN_1242990 |                | MSL31          | -0.534744893 |
| ILMN_2595477 | NM_016887.2    | CLDN7          | -0.53496762  |
| ILMN_2491705 | XM_355003.1    | SCL0001644.1_2 | -0.535572105 |
| ILMN_1229426 | NM_153052.1    | GZMN           | -0.535876699 |
| ILMN_2631894 | NM_133880.1    | PAFAH2         | -0.536020277 |
| ILMN_3108203 | NM_023166.1    | MTVR2          | -0.536148139 |
| ILMN_1235035 | NM_133227.2    | NUP155         | -0.536387159 |
| ILMN_2596757 | NM_194351.1    | 9330175B10RIK  | -0.536666444 |
| ILMN_2820305 | NM_008586.1    | MEP1B          | -0.536782244 |
| ILMN_1227495 | NM_028370.1    | POT1B          | -0.536926724 |
| ILMN_1235502 | XR_032846.1    | LOC624198      | -0.53707464  |

|              |                |                  |              |
|--------------|----------------|------------------|--------------|
| ILMN_2617086 | NM_053207.1    | EGLN1            | -0.537354919 |
| ILMN_2767615 | NM_009721.4    | ATP1B1           | -0.537445107 |
| ILMN_1230883 | NM_029546.2    | PWP2             | -0.537495421 |
| ILMN_2748336 | NM_023502.1    | ELF2             | -0.537699345 |
| ILMN_2601515 | NM_011794.2    | BPNT1            | -0.537867969 |
| ILMN_2614110 | XM_001000961.1 | 5830417I10RIK    | -0.538571833 |
| ILMN_1216812 | NM_025898.3    | NAPA             | -0.538736676 |
| ILMN_2603837 | NM_016865.2    | HTATIP2          | -0.538819809 |
| ILMN_2774435 | NM_026030.2    | EIF2S2           | -0.538959585 |
| ILMN_2751653 | NM_026164.2    | PNPLA8           | -0.539023327 |
| ILMN_1248565 | NM_010178.2    | FUSIP1           | -0.539077024 |
| ILMN_2970742 | NM_029965.2    | RNF170           | -0.539205743 |
| ILMN_2512042 | NM_009454.2    | UBE2E3           | -0.539319137 |
| ILMN_2743244 | NM_019388.2    | CD86             | -0.539323893 |
| ILMN_2741611 | NM_176996.3    | SMO              | -0.539439159 |
| ILMN_1226760 | XM_884359.3    | LOC619973        | -0.540097259 |
| ILMN_2620030 | NM_009794.2    | CAPN2            | -0.540316005 |
| ILMN_2699167 | XM_001477065.1 | LOC100046918     | -0.540379253 |
| ILMN_2666406 | NM_028447.2    | PRRC1            | -0.540464107 |
| ILMN_2683675 | XM_001471971.1 | LOC100044324     | -0.541068602 |
| ILMN_1248181 | NM_010731.3    | ZBTB7A           | -0.541182539 |
| ILMN_1242672 | XM_973360.2    | EG434168         | -0.541649795 |
| ILMN_1255745 | NM_026388.2    | TPRGL            | -0.542312309 |
| ILMN_2584685 |                | E430021P16RIK    | -0.542332941 |
| ILMN_1234541 |                | A130047F11RIK    | -0.542515813 |
| ILMN_2448496 |                | DEF8             | -0.543005271 |
| ILMN_2741445 | NM_133954.1    | AA960436         | -0.543185989 |
| ILMN_1232030 | NM_008446.1    | KIF4             | -0.543198508 |
| ILMN_3148550 | NM_001035122.2 | GOLM1            | -0.543392788 |
| ILMN_2843029 | NM_010763.1    | MAN1A2           | -0.543584592 |
| ILMN_2590061 | NM_133250.1    | MUTYH            | -0.544139235 |
| ILMN_2543767 |                | SET              | -0.544147575 |
| ILMN_2915303 | NM_021407.1    | TREM3            | -0.544344037 |
| ILMN_1215502 |                | P4HA1            | -0.544645984 |
| ILMN_2542311 | XR_001562.1    | LOC547150        | -0.544782919 |
| ILMN_1242176 | NM_145553.1    | BC008163         | -0.545605407 |
| ILMN_2515784 | NM_019656.3    | TSPAN6           | -0.545640711 |
| ILMN_2612143 | NM_011378.1    | SIN3A            | -0.545834322 |
| ILMN_2448404 | AK088505.1     | SCL0002975.1_346 | -0.546311274 |
| ILMN_1236898 | NM_026360.2    | DDX47            | -0.546445588 |
| ILMN_2747202 | NM_026942.2    | STOML1           | -0.546535784 |
| ILMN_2609457 | NM_027352.3    | GORASP2          | -0.546543689 |
| ILMN_1252887 |                | D130064L03RIK    | -0.54665639  |
| ILMN_2730249 | NM_027310.3    | 2310005N01RIK    | -0.546855742 |
| ILMN_2620037 | NM_028036.3    | TMCO6            | -0.547923691 |
| ILMN_2732336 | XM_134937.3    | SCL0003522.1_58  | -0.548096002 |

|              |                |               |              |
|--------------|----------------|---------------|--------------|
| ILMN_1247125 | NM_025923.2    | FANCL         | -0.548237902 |
| ILMN_1253851 | NM_178214.1    | HIST2H2BE     | -0.548853127 |
| ILMN_2650775 | NM_133800.3    | NOL12         | -0.549032516 |
| ILMN_2666380 | NM_012031.1    | SPAG1         | -0.549479833 |
| ILMN_2765407 | NM_138680.1    | LUC7L2        | -0.549819842 |
| ILMN_2987878 | NM_009471.1    | UMPS          | -0.549918341 |
| ILMN_2592519 | NM_010424.4    | HFE           | -0.550102658 |
| ILMN_1224754 | NM_021273.3    | CKB           | -0.550771704 |
| ILMN_2641069 | NM_023900.2    | PLEKHJ1       | -0.550973718 |
| ILMN_2626491 | NM_010358.2    | GSTM1         | -0.551021194 |
| ILMN_1234842 |                | MSI2H         | -0.55106671  |
| ILMN_2655034 | NM_028019.3    | RNF135        | -0.55107376  |
| ILMN_2658208 | NM_030241.2    | SETD8         | -0.551094706 |
| ILMN_2451036 | XM_001477372.1 | LOC100047093  | -0.55111503  |
| ILMN_2567626 |                | PUM1          | -0.551330537 |
| ILMN_2491099 | XM_125902.4    | XPOT          | -0.551541334 |
| ILMN_2606667 | NM_007841.3    | DDX6          | -0.551820463 |
| ILMN_2445989 | NM_029979.1    | TRIM35        | -0.55214123  |
| ILMN_2641874 | NM_172787.2    | L3MBTL3       | -0.552314275 |
| ILMN_1237803 |                | 2010313D22RIK | -0.552669986 |
| ILMN_2649961 |                | SLC35A3       | -0.552781212 |
| ILMN_1229502 | NM_028119.4    | DDB2          | -0.553331288 |
| ILMN_2444023 | NM_016800.2    | VTI1B         | -0.553493479 |
| ILMN_2495961 | NM_001025387.2 | BRD2          | -0.554415751 |
| ILMN_1220073 |                | A430106D13RIK | -0.55461571  |
| ILMN_1233970 | NM_177231.2    | ARRB1         | -0.554815953 |
| ILMN_1259783 | NM_054082.1    | MTA3          | -0.555102492 |
| ILMN_2755293 | NM_175233.2    | 5830472H07RIK | -0.555472877 |
| ILMN_3162426 | NM_001011875.1 | RNASE12       | -0.55565966  |
| ILMN_2457326 | NM_201357.1    | TSSC1         | -0.555703721 |
| ILMN_2759756 | NM_153820.3    | ARHGAP15      | -0.555923008 |
| ILMN_2614644 | XM_920534.2    | 5730406M06RIK | -0.556884108 |
| ILMN_2487170 | NM_009416.3    | TPM2          | -0.556999246 |
| ILMN_1219063 | NM_019995.3    | D3ERTD300E    | -0.557430167 |
| ILMN_1242103 |                | 2610528B01RIK | -0.558268117 |
| ILMN_2708357 | NM_026561.3    | NT5C3L        | -0.558463303 |
| ILMN_2728429 | NM_026918.2    | 1810010M01RIK | -0.558534333 |
| ILMN_2750402 | NM_033080.2    | NUDT19        | -0.559099881 |
| ILMN_3003290 | NM_008231.2    | HDGF          | -0.559144382 |
| ILMN_1226422 | NM_019562.1    | UCHL5         | -0.559675473 |
| ILMN_1235717 | NM_013861.3    | TPK1          | -0.560708461 |
| ILMN_1236888 |                | RANGAP1       | -0.560848743 |
| ILMN_2616573 | XM_001477665.1 | LOC100047214  | -0.561053107 |
| ILMN_2749063 | XM_976471.1    | DOCK10        | -0.561095084 |
| ILMN_2958626 | NM_010633.3    | UHMK1         | -0.561468182 |
| ILMN_1239933 | NM_009980.4    | CTBP2         | -0.561471581 |

|              |                |                |                    |
|--------------|----------------|----------------|--------------------|
| ILMN_1226596 |                | 6330401K01RIK  | -0.562389921       |
| ILMN_2704842 | NM_010623.3    | KIF17          | -0.562533899       |
| ILMN_2833772 | NM_011155.1    | PPP5C          | -0.562879118       |
| ILMN_2496658 |                | A130086G11RIK  | -0.562896952       |
| ILMN_1231518 | NM_172511.2    | ABHD10         | -0.562940066       |
| ILMN_2764995 | NM_023579.4    | IPO5           | -0.562949169       |
| ILMN_2659323 | XM_914270.2    | CNOT1          | -0.563449641       |
| ILMN_2625601 | NM_019990.4    | STARD10        | -0.56348381        |
| ILMN_3163335 | NM_011229.1    | RAB5B          | -0.563972814       |
| ILMN_1227630 | NM_026670.4    | ZMYM1          | -0.56409879        |
| ILMN_1255262 |                | 6530401D06RIK  | -0.565413325       |
| ILMN_1214668 |                | MSI2H          | -0.565477003       |
| ILMN_3108021 | NM_001033464.1 | EFCAB4B        | -0.565492565       |
| ILMN_3004970 | NM_015781.2    | NAP1L1         | -0.565799126       |
| ILMN_2506039 |                | A130090K04RIK  | -0.565866414       |
| ILMN_2726428 | XM_001477068.1 | LOC100046923   | -0.56592775        |
| ILMN_1230485 | NM_001037859.2 | CSF1R          | -0.566041898       |
| ILMN_1247613 | NM_021498.2    | POLE3          | -0.566070798       |
| ILMN_2631813 | NM_026053.1    | GEMIN6         | -0.566635559       |
| ILMN_2684324 | NM_001009947.3 | DOCK11         | -0.566941455       |
| ILMN_2511275 | BC069909.1     | SCL0002064.1_2 | -0.567121639       |
| ILMN_2756008 | NM_016777.2    | NASP           | -0.567379665       |
| ILMN_2746356 | NM_011600.2    | TLE4           | -0.567383106       |
| ILMN_2747912 | NM_009000.3    | RAB24          | -0.567606599       |
| ILMN_2682173 | NM_178620.3    | MFSD11         | -0.567822655       |
| ILMN_3054914 | NM_011909.1    | USP18          | -0.56803715        |
| ILMN_2992517 | NM_019942.2    |                | Sept6 -0.568276457 |
| ILMN_2685507 | NM_009672.2    | ANP32A         | -0.568566868       |
| ILMN_2813594 | NM_183140.1    | ZFP691         | -0.568615988       |
| ILMN_1218799 | NM_010330.3    | EMB            | -0.568822048       |
| ILMN_1225808 | NM_026681.4    | CCDC88C        | -0.568943053       |
| ILMN_2657734 | NM_145975.1    | DDX46          | -0.568966266       |
| ILMN_2503748 | NM_013718.2    | TRAPPC3        | -0.568991261       |
| ILMN_1216801 | NM_025372.3    | TIPIN          | -0.569036521       |
| ILMN_1218814 | NM_029738.2    | CLUAP1         | -0.5692595         |
| ILMN_1239876 | NM_011917.2    | XRN2           | -0.569326431       |
| ILMN_3162879 | NM_152220.1    | STX3           | -0.569491333       |
| ILMN_2702887 | NM_022030.2    | SV2A           | -0.56970931        |
| ILMN_2729458 | NM_010497.2    | IDH1           | -0.569810873       |
| ILMN_2595918 | NM_146167.3    | GIMAP7         | -0.569951198       |
| ILMN_1242619 | NM_028887.3    | SMCHD1         | -0.570315843       |
| ILMN_2950928 | NM_028959.1    | CEP72          | -0.570545348       |
| ILMN_2684910 | NM_181586.2    | SIRT6          | -0.57091026        |
| ILMN_2822477 | NM_012022.1    | PPNR           | -0.571171973       |
| ILMN_1246849 | NM_201357.1    | TSSC1          | -0.571691164       |
| ILMN_2607926 | NM_025841.3    | KDELR2         | -0.572048751       |

|              |                |                |              |
|--------------|----------------|----------------|--------------|
| ILMN_3160648 | NM_001003918.2 | USP7           | -0.572186289 |
| ILMN_2648607 | NM_028993.3    | 9130404D08RIK  | -0.572421328 |
| ILMN_1236988 | NM_172557.2    | RUFY1          | -0.572840149 |
| ILMN_2725305 | NM_001039103.2 | RASA4          | -0.57293681  |
| ILMN_2610835 | NM_019710.1    | SMC1A          | -0.57339448  |
| ILMN_2980661 | NM_007472.1    | AQP1           | -0.573545461 |
| ILMN_2756439 | NM_027898.3    | GRAMD1A        | -0.573806324 |
| ILMN_1218767 | NM_021510.2    | HNRNPH1        | -0.573874004 |
| ILMN_2451035 | XM_133034.1    | UBE2H          | -0.574698237 |
| ILMN_1260502 | XM_132579.5    | PCNP           | -0.575151927 |
| ILMN_2704335 | NM_001042715.3 | CCDC135        | -0.575223614 |
| ILMN_3114365 | NM_178604.3    | TXNL4A         | -0.575242758 |
| ILMN_2590478 | NM_029977.1    | POLQ           | -0.575645007 |
| ILMN_2679695 | NM_178051.3    | MTERFD2        | -0.575647754 |
| ILMN_2816736 | NM_001024730.1 | EG546166       | -0.575714719 |
| ILMN_2704141 | NM_010070.3    | DOK1           | -0.575804852 |
| ILMN_1216407 | NM_183287.2    | 2610318N02RIK  | -0.575969849 |
| ILMN_2728796 | NM_181344.4    | C1RL           | -0.576002684 |
| ILMN_2421925 |                | WDFY1          | -0.576279092 |
| ILMN_1242178 | NM_007410.2    | ADH5           | -0.576436096 |
| ILMN_2756074 | NM_026981.1    | DTWD1          | -0.576532319 |
| ILMN_2824625 | NM_001033442.1 | GM1604         | -0.576547276 |
| ILMN_3066986 | NM_008210.2    | H3F3A          | -0.577205512 |
| ILMN_2754015 | NM_172625.2    | INO80C         | -0.577208973 |
| ILMN_2673441 | NM_153547.4    | GNL3           | -0.577367744 |
| ILMN_2532994 | NM_001081290.1 | BAT2D          | -0.577747605 |
| ILMN_1237620 |                | A730020L20RIK  | -0.577836701 |
| ILMN_2655024 | NM_008359.1    | IL17RA         | -0.578142518 |
| ILMN_2765463 | NM_033618.1    | SUPT16H        | -0.578512672 |
| ILMN_2676434 | NM_001038993.2 | RNF38          | -0.578659881 |
| ILMN_3075003 | NM_145385.1    | MLF2           | -0.578673613 |
| ILMN_1221226 |                | E230017J10RIK  | -0.578787384 |
| ILMN_2714360 | NM_133654.1    | CD34           | -0.578945348 |
| ILMN_1227993 | NM_020505.2    | VAV3           | -0.579265126 |
| ILMN_1214319 | NM_026053.1    | GEMIN6         | -0.579571114 |
| ILMN_1253680 | NM_027297.3    | PRPF4          | -0.579686901 |
| ILMN_1226315 | XM_910524.3    | 9830167H18RIK  | -0.57973477  |
| ILMN_2833786 | NM_024166.4    | CHCHD2         | -0.579784205 |
| ILMN_1238868 | NR_003649.1    | EG432649       | -0.580384245 |
| ILMN_1234361 |                | TBP            | -0.580437867 |
| ILMN_1239795 | NM_009225.1    | SNRPB          | -0.580784114 |
| ILMN_2581394 |                | E230026L19RIK  | -0.581215929 |
| ILMN_2603699 | NM_009689.2    | BIRC5          | -0.581259378 |
| ILMN_1258613 |                | N4WBP5-PENDING | -0.581530836 |
| ILMN_1246024 |                | RNPEP          | -0.581787983 |
| ILMN_3162887 | NM_001013817.2 | SP140          | -0.582461185 |



|              |                |                |              |
|--------------|----------------|----------------|--------------|
| ILMN_1245030 | NM_001081107.1 | HEL308         | -0.582582905 |
| ILMN_1229433 | NM_172455.2    | TMPRSS7        | -0.583118023 |
| ILMN_1216393 | XM_358946.1    | LOC385791      | -0.583457767 |
| ILMN_2685516 | NM_008225.1    | HCLS1          | -0.583691825 |
| ILMN_1236180 | NM_133767.2    | MTIF2          | -0.583964948 |
| ILMN_1235657 | NM_021472.3    | RNASE4         | -0.584232838 |
| ILMN_2626683 | NM_029862.3    | 5930434B04RIK  | -0.584316018 |
| ILMN_1255110 | NM_016776.2    | MYBBP1A        | -0.584363213 |
| ILMN_1243234 | XM_150227.8    | MSL2L1         | -0.584503862 |
| ILMN_2449353 |                | PPP2R5C        | -0.584617083 |
| ILMN_1252593 |                | D930007N19RIK  | -0.585122542 |
| ILMN_1253235 |                | CUGBP2         | -0.585129993 |
| ILMN_1248824 |                | C230082I21RIK  | -0.585265745 |
| ILMN_2425351 | NM_146144.3    | USP1           | -0.585278196 |
| ILMN_1230680 |                | D130057F13RIK  | -0.585787219 |
| ILMN_1213034 |                | 2010312A17RIK  | -0.585960197 |
| ILMN_2694577 | NM_007744.2    | COMT           | -0.586152335 |
| ILMN_2455920 | AK009508.1     | SCL000408.1_6  | -0.586189769 |
| ILMN_2684378 | NM_181815.2    | 4930534B04RIK  | -0.586290789 |
| ILMN_1229763 | NM_172899.3    | DMKN           | -0.58672942  |
| ILMN_1216827 | XM_181410.4    | 6330503C17RIK  | -0.586750205 |
| ILMN_2479786 | NM_152234.1    | UBQLN1         | -0.586816676 |
| ILMN_1248084 |                | 4933412A02RIK  | -0.586921198 |
| ILMN_2717374 | NM_008786.1    | PCMT1          | -0.586981043 |
| ILMN_2515363 | NM_001001491.1 | TPM4           | -0.587014546 |
| ILMN_1220632 | NM_008950.1    | PSMC5          | -0.587088511 |
| ILMN_1255833 | AY267348.1     | SCL0001905.1_3 | -0.58713089  |
| ILMN_2668805 | NM_011484.2    | STAM           | -0.587178205 |
| ILMN_1249945 |                | 9930004G02RIK  | -0.587341002 |
| ILMN_1258988 | NM_010517.3    | IGFBP4         | -0.587409477 |
| ILMN_1215434 | NM_013910.2    | FBXL10         | -0.587984712 |
| ILMN_1254531 | NM_001081409.1 | PHF20L1        | -0.588069638 |
| ILMN_3095257 | NM_026120.4    | 2410127L17RIK  | -0.58808533  |
| ILMN_3152506 | NM_001037863.1 | ATP11C         | -0.58844307  |
| ILMN_1259609 |                | 1110003F05RIK  | -0.589072078 |
| ILMN_1237206 | NM_023130.2    | RALY           | -0.589220464 |
| ILMN_2660409 | NM_026257.1    | D4BWG1540E     | -0.589309376 |
| ILMN_1216681 | XR_033448.1    | LOC667776      | -0.589347948 |
| ILMN_1253075 | NM_024282.3    | FAM152A        | -0.589552984 |
| ILMN_2660182 | NM_133348.1    | ACOT7          | -0.589844214 |
| ILMN_2706251 | NM_028868.3    | CXXC1          | -0.589955978 |
| ILMN_1259818 |                | C130057N11RIK  | -0.590146071 |
| ILMN_2724014 | NM_007936.3    | EPHA4          | -0.590261178 |
| ILMN_2715893 | NM_026346.1    | FBXO32         | -0.590322812 |
| ILMN_2625680 | NM_013814.2    | GALNT1         | -0.590437814 |
| ILMN_1218024 |                | ARHGEF6        | -0.590539101 |

|              |                |                |              |
|--------------|----------------|----------------|--------------|
| ILMN_2723860 | XM_131934.4    | PKM2           | -0.590653013 |
| ILMN_2737090 | NR_003634.1    | RPS4Y2         | -0.590759297 |
| ILMN_3086889 | NM_001038018.1 | GPRK6          | -0.591228382 |
| ILMN_2578798 |                | D030032D21RIK  | -0.591422371 |
| ILMN_1259442 | NM_178017.1    | HMGB2L1        | -0.591488638 |
| ILMN_1224472 | NM_013652.2    | CCL4           | -0.591694293 |
| ILMN_1260073 | NM_025967.2    | D16ERTD472E    | -0.591730669 |
| ILMN_2632964 | NM_146261.1    | BC031748       | -0.591832565 |
| ILMN_1233501 |                | C530027B15RIK  | -0.591917988 |
| ILMN_2674655 | NM_025370.2    | 1110018J18RIK  | -0.592254532 |
| ILMN_2441635 | NM_025996.3    | TOMM34         | -0.592727148 |
| ILMN_2483297 | NM_027494.2    | ZCCHC8         | -0.592992618 |
| ILMN_1260241 | NM_172593.2    | MIER3          | -0.593209946 |
| ILMN_1234014 | NM_001001321.3 | SLC35D2        | -0.593220932 |
| ILMN_1243290 | NM_210071.1    | EYA3           | -0.593279469 |
| ILMN_2505845 |                | DIRAS2         | -0.593286646 |
| ILMN_1241588 |                | TOR2A          | -0.593377123 |
| ILMN_1259917 |                | D330001F19RIK  | -0.593591988 |
| ILMN_2544597 |                | 2810409M01RIK  | -0.59445616  |
| ILMN_2644392 | NM_053196.2    | SFXN2          | -0.594796124 |
| ILMN_1226660 | XM_001478079.1 | LOC100047402   | -0.594891382 |
| ILMN_1225565 | NM_010512.3    | IGF1           | -0.595251805 |
| ILMN_2874084 | NM_139305.1    | CAR9           | -0.595701536 |
| ILMN_1233595 |                | MRPL15         | -0.595954797 |
| ILMN_2604556 | NM_008802.1    | PDE7A          | -0.595966763 |
| ILMN_2504717 | NM_030684.1    | TRIM34         | -0.596246665 |
| ILMN_2604985 | NM_025876.2    | CDK5RAP1       | -0.596537744 |
| ILMN_2501670 | NM_016690.4    | HNRPDL         | -0.596995729 |
| ILMN_2471161 | AK041138.1     | SCL0003955.1_3 | -0.597202468 |
| ILMN_2618794 | XM_127497.2    | PTCD2          | -0.597213153 |
| ILMN_2653681 | NM_023858.2    | MTMR2          | -0.598285263 |
| ILMN_2623536 | NM_027307.4    | GOLM1          | -0.598748572 |
| ILMN_1214850 | NM_011035.2    | PAK1           | -0.59960218  |
| ILMN_2448002 | NM_026936.3    | OXA1L          | -0.599799002 |
| ILMN_1226783 | NM_029926.4    | IRAK4          | -0.600022971 |
| ILMN_2845214 | NM_028233.1    | LRPPRC         | -0.600334269 |
| ILMN_3129752 | NM_147153.2    | VPS39          | -0.600352173 |
| ILMN_3145814 | NM_001081079.1 | OGFRL1         | -0.60050209  |
| ILMN_1254015 | NM_013777.2    | AKR1C12        | -0.600797188 |
| ILMN_1255250 |                | A230056E14RIK  | -0.601113015 |
| ILMN_1223159 |                | A930025J12RIK  | -0.601422696 |
| ILMN_1242852 | NM_025793.2    | WDR45L         | -0.602326422 |
| ILMN_1235678 | NM_028259.3    | RPS6KB1        | -0.602935277 |
| ILMN_3135107 | NM_027379.2    | FAR1           | -0.602945296 |
| ILMN_1252827 |                | 6430524C05RIK  | -0.603014763 |
| ILMN_2690249 | NM_001080381.1 | 6330500D04RIK  | -0.603243368 |

|              |                |                |              |
|--------------|----------------|----------------|--------------|
| ILMN_1254958 |                | 9430015G10RIK  | -0.603710502 |
| ILMN_2646049 | NM_027742.2    | LRRFIP2        | -0.604226407 |
| ILMN_1255907 |                | ARP2           | -0.604247584 |
| ILMN_2894211 | NM_145980.1    | 8430408G22RIK  | -0.604454018 |
| ILMN_1220228 | NM_145404.1    | PRMT7          | -0.604752264 |
| ILMN_3115677 | NM_001042708.1 | ILF3           | -0.605089239 |
| ILMN_2744683 | NM_007547.2    | SIRPA          | -0.606802521 |
| ILMN_2762582 | NM_013660.1    | SEMA4D         | -0.607142519 |
| ILMN_2608151 | NM_178165.2    | FCRL1          | -0.608365964 |
| ILMN_1250773 | XM_194386.3    | DOCK1          | -0.608469013 |
| ILMN_1223035 | NM_019687.3    | SLC22A4        | -0.608625426 |
| ILMN_2836137 | NM_177733.2    | E2F2           | -0.608671595 |
| ILMN_1233449 | XM_001472240.1 | LOC100044430   | -0.608792334 |
| ILMN_1243162 | NM_080727.1    | TMPRSS3        | -0.60911842  |
| ILMN_2447999 | XM_127742.4    | SCL000292.1_12 | -0.609145065 |
| ILMN_2451022 | NM_011701.3    | VIM            | -0.609533182 |
| ILMN_1244828 | NM_001080948.1 | LARP4          | -0.609874814 |
| ILMN_1249744 |                | D030049N18RIK  | -0.609993789 |
| ILMN_3031099 | NM_001039710.1 | COQ10B         | -0.610180556 |
| ILMN_2693454 | NM_175146.2    | TSR2           | -0.610192931 |
| ILMN_2602687 | NM_011284.3    | RPA2           | -0.610193283 |
| ILMN_3096175 | NM_001015876.1 | TYW1           | -0.610243276 |
| ILMN_1215536 |                | E130301F21RIK  | -0.61078772  |
| ILMN_1220569 |                | 5730589K01RIK  | -0.610815089 |
| ILMN_1245965 | XM_001480621.1 | LOC100043675   | -0.61098087  |
| ILMN_2608429 | NM_013477.3    | ATP6V0D1       | -0.611031642 |
| ILMN_1224110 | NM_198095.2    | BST2           | -0.611059206 |
| ILMN_2712697 | NM_011862.2    | PACSIN2        | -0.611689747 |
| ILMN_1248122 | XM_979178.1    | LOC432555      | -0.611721618 |
| ILMN_2479530 | NM_009572.3    | ZHX1           | -0.612031773 |
| ILMN_1242390 | NM_021895.2    | ACTN4          | -0.612168147 |
| ILMN_2795698 | NM_153783.2    | PAOX           | -0.612364714 |
| ILMN_2643879 | NM_016921.2    | TCIRG1         | -0.612512444 |
| ILMN_2687403 | NM_010188.4    | FCGR3          | -0.612668881 |
| ILMN_2613354 | NM_138598.5    | D11WSU99E      | -0.61303854  |
| ILMN_2951691 | NM_178205.1    | HIST1H3E       | -0.614272696 |
| ILMN_2686097 | NM_146127.2    | FAM110A        | -0.614284105 |
| ILMN_1221572 | NM_145520.3    | TRUB2          | -0.614626238 |
| ILMN_2441359 | NM_178851.2    | VPS39          | -0.614803573 |
| ILMN_2505100 | NM_001033161.2 | TRADD          | -0.615073227 |
| ILMN_1213866 | NM_029745.2    | TBC1D9B        | -0.615212082 |
| ILMN_3116560 | NM_011375.2    | ST3GAL5        | -0.615307856 |
| ILMN_1222927 |                | 0610009O04RIK  | -0.615587833 |
| ILMN_2482494 | NM_053169.2    | TRIM16         | -0.615670508 |
| ILMN_2486267 | NM_019949.1    | UBE2L6         | -0.616159197 |
| ILMN_1237886 | NM_007930.3    | ENC1           | -0.61624533  |

|              |                |               |              |
|--------------|----------------|---------------|--------------|
| ILMN_1229873 |                | B930036M14RIK | -0.616851526 |
| ILMN_2643876 | NM_016921.2    | TCIRG1        | -0.61813941  |
| ILMN_2557426 |                | E430021A19RIK | -0.619046906 |
| ILMN_2956765 | NM_011696.1    | VDAC3         | -0.619083441 |
| ILMN_1243082 | NM_029679.1    | 6330500D04RIK | -0.619260247 |
| ILMN_2742879 |                | ALKBH         | -0.619840723 |
| ILMN_1256860 |                | 7420700D11RIK | -0.620017149 |
| ILMN_2503651 | NM_009481.2    | USP9X         | -0.620148673 |
| ILMN_2718356 | NM_177298.3    | PISD          | -0.620503449 |
| ILMN_2734028 | NM_011529.1    | TANK          | -0.620680461 |
| ILMN_1236139 | NM_010852.1    | MYEF2         | -0.620751106 |
| ILMN_2660898 | NM_025630.2    | AGGF1         | -0.621270695 |
| ILMN_2708297 | NM_019880.3    | MTCH1         | -0.621675644 |
| ILMN_1228635 | XM_978945.1    | PUM2          | -0.622231253 |
| ILMN_2729985 | NM_012001.1    | COPS4         | -0.622294769 |
| ILMN_2693124 | NM_029576.1    | RAB1B         | -0.622388962 |
| ILMN_1254179 | NM_028712.4    | RAP2B         | -0.622567468 |
| ILMN_2646556 | NM_145960.2    | MTRF1         | -0.623403303 |
| ILMN_2603559 | NM_025630.2    | AGGF1         | -0.623557058 |
| ILMN_1224714 | XM_988632.2    | LOC634731     | -0.623913194 |
| ILMN_2728477 | NM_019834.3    | GIT2          | -0.624496078 |
| ILMN_2712634 | NM_008667.2    | NAB1          | -0.624579864 |
| ILMN_1247268 | NM_026507.3    | ZWILCH        | -0.625087588 |
| ILMN_1249959 | NM_028011.2    | TOM1L1        | -0.625175304 |
| ILMN_2672850 | NM_080288.1    | ELMO1         | -0.625642159 |
| ILMN_2447875 |                | 6330509M05RIK | -0.626904107 |
| ILMN_2924619 | NM_175347.4    | SRL           | -0.626904798 |
| ILMN_2642411 | NM_173187.2    | 2310035C23RIK | -0.627390316 |
| ILMN_2730957 | NM_199467.1    | F730047E07RIK | -0.62760433  |
| ILMN_1234292 | XM_894265.2    | EG629383      | -0.627644651 |
| ILMN_1219102 |                | 5133400O11RIK | -0.627770879 |
| ILMN_2792868 | NM_144923.2    | BLVRB         | -0.627875339 |
| ILMN_2605645 |                | GSN           | -0.62797323  |
| ILMN_1258782 | NM_016786.2    | HIP2          | -0.629411752 |
| ILMN_2775655 | NM_001042541.1 | AKAP1         | -0.629879844 |
| ILMN_2734667 | NM_027134.2    | MTFMT         | -0.629988923 |
| ILMN_2700982 | NM_008816.2    | PECAM1        | -0.630377133 |
| ILMN_2944870 | NM_175174.2    | KLHL5         | -0.63038807  |
| ILMN_1236100 | NM_028456.1    | RWDD3         | -0.630455388 |
| ILMN_2806180 | NM_007782.1    | CSF3R         | -0.631043729 |
| ILMN_1258466 | XM_358377.1    | LOC380623     | -0.631358307 |
| ILMN_2660082 | NM_145955.3    | 1110007A13RIK | -0.631526158 |
| ILMN_1214800 | NM_027445.1    | RNF167        | -0.632235338 |
| ILMN_1237842 | NM_007712.2    | CLK2          | -0.633070579 |
| ILMN_3002971 | NM_130879.2    | USP48         | -0.633215085 |
| ILMN_2741249 |                | STAU2         | -0.633256601 |

|              |                |                 |              |
|--------------|----------------|-----------------|--------------|
| ILMN_1245500 | NM_170591.1    | NUPL1           | -0.633668965 |
| ILMN_1219712 | NM_016748.1    | CTPS            | -0.633680621 |
| ILMN_1253996 | NM_054089.2    | NCOA6IP         | -0.634299084 |
| ILMN_2680128 | NM_026083.2    | ZC3H13          | -0.634566868 |
| ILMN_2688822 | NM_030087.2    | 1500032D16RIK   | -0.634993867 |
| ILMN_2593532 | NM_146000.2    | BUD13           | -0.635133521 |
| ILMN_2655677 | NM_008618.2    | MDH1            | -0.63522019  |
| ILMN_2641038 | NM_013515.1    | EPB7.2          | -0.635248572 |
| ILMN_2659063 | NM_013457.2    | ADD1            | -0.635323028 |
| ILMN_1215331 | NM_148948.2    | DICER1          | -0.635636654 |
| ILMN_3140071 | NM_194054.1    | RTN4            | -0.635942907 |
| ILMN_2764759 | XM_125370.1    | DXIMX39E        | -0.636124199 |
| ILMN_1216538 | NM_021328.3    | BIN3            | -0.636157348 |
| ILMN_1215919 | NM_198724.1    | EGFL7           | -0.63653993  |
| ILMN_1221348 | NM_201642.4    | UGT1A7C         | -0.636665729 |
| ILMN_2575779 |                | B230333E16RIK   | -0.636873339 |
| ILMN_2657124 | XM_888318.3    | EG623818        | -0.637059364 |
| ILMN_2919860 | NM_173370.3    | CDS1            | -0.637333068 |
| ILMN_1226329 | NM_010740.3    | CD93            | -0.637342431 |
| ILMN_2746766 | XM_001476699.1 | LOC100046393    | -0.638129098 |
| ILMN_2435835 | NM_025276.3    | EVPL            | -0.638328387 |
| ILMN_1259185 | NM_172991.2    | C030048B08RIK   | -0.638613879 |
| ILMN_1229609 | NM_025594.3    | ZMAT2           | -0.638886182 |
| ILMN_2450031 | AK081191.1     | SCL0004020.1_31 | -0.639929201 |
| ILMN_1230211 |                | RALGPS1         | -0.640171267 |
| ILMN_3163288 | NM_198725.1    | EGFL7           | -0.640292016 |
| ILMN_2492805 | AK007474.1     | SCL0003949.1_31 | -0.640360126 |
| ILMN_1245598 | XM_001474956.1 | LOC100045890    | -0.641242934 |
| ILMN_2882088 | NM_145509.1    | 5430435G22RIK   | -0.641568385 |
| ILMN_3085317 | NM_029334.1    | ZC3H14          | -0.641775229 |
| ILMN_2432075 |                | 4833420G11RIK   | -0.64251181  |
| ILMN_2747641 | NM_008446.1    | KIF4            | -0.642655936 |
| ILMN_2601507 | NM_011794.3    | BPNT1           | -0.643095224 |
| ILMN_2731473 | NM_145946.2    | FANCI           | -0.643517958 |
| ILMN_2765304 | NM_199035.1    | ALG8            | -0.643678842 |
| ILMN_1236349 | NM_027946.3    | WDR68           | -0.643697155 |
| ILMN_2912872 | NM_022996.1    | NDFIP1          | -0.643825189 |
| ILMN_2926480 | NM_001024474.2 | DIRAS2          | -0.644029491 |
| ILMN_1220104 | NM_027349.1    | 2600011C06RIK   | -0.64433272  |
| ILMN_2594419 | NM_018771.3    | GIPC1           | -0.644755488 |
| ILMN_2718453 | NM_145996.3    | ARID5A          | -0.644984904 |
| ILMN_2625681 | NM_013814.2    | GALNT1          | -0.645113066 |
| ILMN_3107114 | NM_011502.2    | STX3            | -0.645429304 |
| ILMN_1230604 | NM_029609.1    | 2310007H09RIK   | -0.646085336 |
| ILMN_2606015 | NM_025607.2    | 2500002L14RIK   | -0.646359515 |
| ILMN_2492377 | NM_023230.2    | UBE2V1          | -0.64710658  |

|              |                |                 |              |
|--------------|----------------|-----------------|--------------|
| ILMN_1252199 | NM_007517.3    | AUP1            | -0.647137339 |
| ILMN_1229755 | NM_175653.1    | HIST1H3C        | -0.647264632 |
| ILMN_2418116 | NM_001025438.1 | CAMK2D          | -0.647757994 |
| ILMN_1223437 | NM_001077510.1 | GNAS            | -0.648138549 |
| ILMN_2668509 | NM_017370.1    | HP              | -0.648596356 |
| ILMN_1235939 | NM_144846.4    | 0910001A06RIK   | -0.648673893 |
| ILMN_2592629 | NM_025623.2    | NIPSNAP3A       | -0.6494029   |
| ILMN_2598402 | NM_001081009.1 | PARP8           | -0.650045989 |
| ILMN_2620729 | NM_029635.3    | COMMD9          | -0.651346203 |
| ILMN_3047389 | NM_010260.1    | GBP2            | -0.651369861 |
| ILMN_1226035 | NM_024196.3    | TBC1D20         | -0.651568115 |
| ILMN_2471359 | NM_001080134.1 | TMPO            | -0.653885685 |
| ILMN_2698282 | NM_010178.1    | FUSIP1          | -0.654026365 |
| ILMN_2439089 | NM_145628.3    | USP11           | -0.654215392 |
| ILMN_2426752 |                | F830005D05RIK   | -0.654267257 |
| ILMN_2597567 | XM_001476583.1 | LOC100046608    | -0.654603831 |
| ILMN_3104857 | NM_026102.2    | DAAM1           | -0.654925534 |
| ILMN_1223697 | NM_001039150.1 | CD44            | -0.655402987 |
| ILMN_3105205 | NM_001039533.1 | PDXDC1          | -0.655864265 |
| ILMN_2544674 |                | 2310045K21RIK   | -0.655897818 |
| ILMN_2989480 | NM_025853.1    | DSN1            | -0.655958438 |
| ILMN_1237980 |                | 0610010D24RIK   | -0.656018441 |
| ILMN_1239384 | NM_016883.3    | PSMD10          | -0.656426519 |
| ILMN_1249762 | XM_137113.4    | LOC211870       | -0.65678341  |
| ILMN_2786764 | NM_025887.2    | RAB5A           | -0.657883387 |
| ILMN_2485774 | BC024092.1     | SCL0001371.1_19 | -0.658433144 |
| ILMN_3163572 | NM_001037723.2 | ADCY7           | -0.658657643 |
| ILMN_1245093 | NM_016902.3    | NPHP1           | -0.658761384 |
| ILMN_2737517 | NM_007714.4    | CLK4            | -0.65907413  |
| ILMN_2620390 | NM_028761.3    | PARN            | -0.659471818 |
| ILMN_2422014 | XM_001474539.1 | LOC100040353    | -0.659523454 |
| ILMN_1215761 | NM_019648.3    | METAP2          | -0.65980836  |
| ILMN_2555438 |                | A930030J18RIK   | -0.659988825 |
| ILMN_1216295 | NM_009010.4    | RAD23A          | -0.66038232  |
| ILMN_2463447 | NM_013718.2    | TRAPPC3         | -0.660762216 |
| ILMN_3111334 | NM_001005525.1 | RSRC2           | -0.660847345 |
| ILMN_2733796 | NM_144806.1    | PRPSAP2         | -0.661029236 |
| ILMN_1251846 |                | ARHGAP8         | -0.661280029 |
| ILMN_2640742 | NM_016786.3    | UBE2K           | -0.66188665  |
| ILMN_2557635 | NM_172457.2    | MOBK2A          | -0.662105572 |
| ILMN_2987937 | NM_018748.3    | GOLGA4          | -0.662699154 |
| ILMN_2732482 | NM_178090.2    | DRBP1           | -0.663050716 |
| ILMN_2714278 | NM_026621.1    | 2810046M22RIK   | -0.663643746 |
| ILMN_2630536 | NM_010804.3    | MLLT10          | -0.663810452 |
| ILMN_2540344 | XM_358671.1    | LOC381889       | -0.664228319 |
| ILMN_2603412 | NM_172117.4    | ENTPD6          | -0.664372367 |

|              |                |                    |              |
|--------------|----------------|--------------------|--------------|
| ILMN_2742345 | NM_172490.3    | SEPSECS            | -0.664505579 |
| ILMN_2997256 | NM_026176.2    | PDCL               | -0.66465321  |
| ILMN_2483405 |                | 1190005N23RIK      | -0.665186741 |
| ILMN_1220186 | NM_054043.3    | MSI2               | -0.665246559 |
| ILMN_2658931 | NM_145527.3    | MADD               | -0.66579976  |
| ILMN_1223898 | XM_192925.3    | ITCH               | -0.665863501 |
| ILMN_2681311 | XM_904433.2    | 1810007M14RIK      | -0.666008729 |
| ILMN_2955020 | NM_173394.2    | TICAM2             | -0.666016267 |
| ILMN_2997406 | NM_177305.3    | ARL4C              | -0.666149699 |
| ILMN_1245448 | NM_172598.2    | WDHD1              | -0.666446933 |
| ILMN_2748839 | NM_016714.2    | NUP50              | -0.666723991 |
| ILMN_2939071 | NM_009810.2    | CASP3              | -0.666955801 |
| ILMN_2748164 | NM_013548.2    | HIST1H3F           | -0.666970003 |
| ILMN_1220165 | NM_001037761.1 | CAPZB              | -0.667006586 |
| ILMN_2433110 |                | IGHV12S1_M22439_IG | -0.66712974  |
| ILMN_1228316 | NM_010273.3    | GDI1               | -0.667637015 |
| ILMN_3135409 | NM_207705.1    | ELMO2              | -0.667961728 |
| ILMN_1244628 | NM_026319.2    | IFT74              | -0.668057451 |
| ILMN_1244148 | NM_001081366.1 | VPS8               | -0.668481041 |
| ILMN_2856157 | NM_023418.2    | PGAM1              | -0.668529402 |
| ILMN_2769490 | NM_145509.2    | 5430435G22RIK      | -0.668568884 |
| ILMN_2702464 | NM_008027.1    | FLOT1              | -0.668915306 |
| ILMN_2553710 |                | A430010E21RIK      | -0.668991485 |
| ILMN_1247317 | NM_009836.1    | CCT3               | -0.669664628 |
| ILMN_2891065 | NM_146698.2    | OLFR1443           | -0.670579927 |
| ILMN_2497877 |                | 2610301N02RIK      | -0.670701554 |
| ILMN_2560804 |                | C630044O20RIK      | -0.670786123 |
| ILMN_1220530 | NM_019710.1    | SMC1A              | -0.670800022 |
| ILMN_3065816 | NM_001039169.1 | EIF4E2             | -0.671271412 |
| ILMN_3099242 | NM_001025566.1 | CHKA               | -0.671349209 |
| ILMN_2738750 | NM_016677.3    | HPCAL1             | -0.671686811 |
| ILMN_2668808 | NM_011484.2    | STAM               | -0.672764473 |
| ILMN_2945694 | NM_013550.3    | HIST1H3A           | -0.67282134  |
| ILMN_1247199 | XM_001476780.1 | LOC100046770       | -0.67325038  |
| ILMN_1227649 | NM_008180.1    | GSS                | -0.673887924 |
| ILMN_2730729 | NM_029607.1    | 2310003C23RIK      | -0.67429515  |
| ILMN_2759944 | NM_011203.2    | PTPN12             | -0.674909369 |
| ILMN_2523903 | XM_124187.1    | 1100001F19RIK      | -0.675244012 |
| ILMN_2517611 |                | 7530408C15RIK      | -0.67547596  |
| ILMN_2570699 |                | D030027P05RIK      | -0.675579454 |
| ILMN_2631892 | NM_133880.1    | PAFAH2             | -0.676205644 |
| ILMN_1241952 |                | 6230415M23RIK      | -0.676700245 |
| ILMN_1234152 | NM_019761.5    | NXT1               | -0.676990869 |
| ILMN_2552170 |                | 5830430H09RIK      | -0.677109372 |
| ILMN_2959976 | NM_011622.2    | TOM1               | -0.677672206 |
| ILMN_2745037 | NM_024191.1    | ARL2BP             | -0.678005457 |

|              |                |               |              |
|--------------|----------------|---------------|--------------|
| ILMN_2668510 | NM_017370.1    | HP            | -0.678128369 |
| ILMN_2758249 | NM_029291.1    | ASCC2         | -0.678155727 |
| ILMN_1259075 | NM_138314.2    | NME7          | -0.678204238 |
| ILMN_2842060 | NM_080708.1    | BMP2K         | -0.678679137 |
| ILMN_1235186 | NM_144874.3    | COX15         | -0.679292533 |
| ILMN_1254717 | NM_001080941.1 | ZFP429        | -0.680079974 |
| ILMN_1240466 | NM_178041.1    | EIF5          | -0.680238107 |
| ILMN_1238691 | NM_026177.3    | 1200011I18RIK | -0.680602749 |
| ILMN_2649067 | NM_008390.1    | IRF1          | -0.680678168 |
| ILMN_1220874 | NM_172654.2    | 5330401P04RIK | -0.681092157 |
| ILMN_1255679 | XM_357613.1    | LOC384382     | -0.681145036 |
| ILMN_1217428 | XM_889916.3    | EG625349      | -0.681151131 |
| ILMN_1244061 | NM_016714.2    | NUP50         | -0.681382658 |
| ILMN_2752790 | NM_026960.3    | GSDMDC1       | -0.681691019 |
| ILMN_2626318 | NM_023502.1    | ELF2          | -0.681983609 |
| ILMN_2701891 | NM_010807.3    | MARCKSL1      | -0.682248871 |
| ILMN_2940394 | NM_026113.2    | 2410016F19RIK | -0.682321434 |
| ILMN_2428301 | NM_001042634.1 | CLK1          | -0.682709692 |
| ILMN_2755804 | NM_001029982.1 | SEC23IP       | -0.682985763 |
| ILMN_1241795 | NM_029868.2    | GPBP1L1       | -0.683007744 |
| ILMN_2718600 | NM_010914.2    | NFYB          | -0.683126357 |
| ILMN_2612350 | NM_026959.2    | STX18         | -0.683196945 |
| ILMN_2625687 | NM_013814.2    | GALNT1        | -0.683347364 |
| ILMN_1241171 | NM_013470.1    | ANXA3         | -0.683547641 |
| ILMN_2539454 | XM_001479143.1 | LOC100042952  | -0.683670067 |
| ILMN_1236793 | XR_031092.1    | LOC665047     | -0.683824761 |
| ILMN_2923607 | NM_013750.1    | PHLDA3        | -0.683980151 |
| ILMN_1241696 | NM_013907.2    | FBXW4         | -0.684701288 |
| ILMN_1241237 |                | 5830420C15RIK | -0.684920475 |
| ILMN_2650732 | NM_027427.1    | TAF15         | -0.685098061 |
| ILMN_1216337 | NM_001029841.3 | SLA           | -0.686236979 |
| ILMN_2534151 | XM_905096.3    | IRGB10        | -0.68672244  |
| ILMN_2756046 | NM_146187.3    | FFAR2         | -0.686753326 |
| ILMN_1216091 | NM_145940.2    | WIPI1         | -0.686957631 |
| ILMN_2428798 |                | 5031439G07RIK | -0.687010336 |
| ILMN_2614861 | NM_177721.3    | RANBP6        | -0.68713867  |
| ILMN_2705067 | NM_026360.2    | DDX47         | -0.6871841   |
| ILMN_1231803 | NM_011806.2    | DMTF1         | -0.687740341 |
| ILMN_2589219 |                | EPB4.1L2      | -0.688088153 |
| ILMN_2464061 | NM_019756.2    | TUBD1         | -0.688647724 |
| ILMN_2730478 | NM_181414.5    | PIK3C3        | -0.688729908 |
| ILMN_1223685 | NM_027412.3    | TTC9C         | -0.68917465  |
| ILMN_2910934 | NM_013706.1    | CD52          | -0.689266788 |
| ILMN_1256950 | NM_001082974.1 | NEURL2        | -0.689358511 |
| ILMN_1245121 | NM_178648.2    | UBXN8         | -0.68940682  |
| ILMN_1252283 | NM_054040.2    | TULP4         | -0.689622659 |



|              |                |               |              |
|--------------|----------------|---------------|--------------|
| ILMN_1257333 | NM_175149.3    | 2310022B05RIK | -0.690069248 |
| ILMN_2435079 | NM_172700.2    | ZMPSTE24      | -0.690319535 |
| ILMN_3163044 | NM_025942.2    | OLA1          | -0.691433717 |
| ILMN_2672846 | NM_080288.1    | ELMO1         | -0.69200774  |
| ILMN_2735174 | NM_146207.1    | CUL4A         | -0.692515409 |
| ILMN_2582952 |                | E030030K01RIK | -0.693119387 |
| ILMN_2863390 | NM_010184.1    | FCER1A        | -0.693611252 |
| ILMN_1257268 | NM_030675.2    | KRIT1         | -0.694006273 |
| ILMN_3094743 | NM_001080129.1 | TMPO          | -0.696446184 |
| ILMN_1230051 |                | TRRP2         | -0.696799349 |
| ILMN_1248041 | NM_009072.2    | ROCK2         | -0.696898945 |
| ILMN_2456241 | NM_001005523.1 | RSRC2         | -0.697120021 |
| ILMN_3157483 | NM_001038642.1 | ETS1          | -0.697505935 |
| ILMN_2719732 | NM_133246.4    | MS4A3         | -0.697652553 |
| ILMN_2651137 | NM_010693.1    | LCK           | -0.697850668 |
| ILMN_1258991 | NM_198703.1    | WNK1          | -0.698897271 |
| ILMN_1237767 | NM_008261.2    | HNF4A         | -0.699245357 |
| ILMN_2617087 | NM_053207.1    | EGLN1         | -0.699606535 |
| ILMN_2758878 | NM_026432.2    | TMEM66        | -0.700314661 |
| ILMN_2996683 | NM_008990.2    | PVRL2         | -0.700425001 |
| ILMN_3117714 | NM_001039214.3 | MEX3C         | -0.700996134 |
| ILMN_2622671 | NM_007981.3    | ACSL1         | -0.701254895 |
| ILMN_2492161 | NM_201357.1    | TSSC1         | -0.701312899 |
| ILMN_1214950 | NM_025282.2    | MEF2C         | -0.7014638   |
| ILMN_1247062 | NM_016681.3    | CHEK2         | -0.701601668 |
| ILMN_2593293 | XM_133979.7    | PPFIA1        | -0.70162848  |
| ILMN_1230353 | NM_009744.3    | BCL6          | -0.701777806 |
| ILMN_1219904 | NM_146173.2    | TSPAN33       | -0.701842244 |
| ILMN_2655204 |                | APC           | -0.701931631 |
| ILMN_1244083 | XM_354675.1    | ARID4A        | -0.702032638 |
| ILMN_1257971 | NM_019952.3    | CLCF1         | -0.70206409  |
| ILMN_1223257 | NM_013652.2    | CCL4          | -0.702549405 |
| ILMN_2606990 | NM_023066.2    | ASPH          | -0.703005268 |
| ILMN_1232225 | NM_029988.2    | PIGH          | -0.703820328 |
| ILMN_1251055 | XM_001475449.1 | LOC100040961  | -0.704422497 |
| ILMN_1220236 | NM_007800.1    | CTSG          | -0.704884238 |
| ILMN_2677595 | NM_133762.3    | NCAPG2        | -0.705835088 |
| ILMN_2657356 | NM_010715.2    | LIG1          | -0.706267797 |
| ILMN_1246446 | NM_133807.1    | LRRC59        | -0.706290154 |
| ILMN_2494707 |                | LOC381232     | -0.706333046 |
| ILMN_1254555 |                | SMCX          | -0.706899003 |
| ILMN_3099758 | NM_028744.1    | PI4K2B        | -0.707833929 |
| ILMN_2605679 | NM_011602.2    | TLN1          | -0.707867859 |
| ILMN_2525051 | XM_147267.1    | ATP6A1        | -0.708366971 |
| ILMN_2632940 |                | SUMO1         | -0.708720347 |
| ILMN_1222865 | NM_025770.3    | ATG10         | -0.708989168 |

|              |                |               |              |
|--------------|----------------|---------------|--------------|
| ILMN_3060766 | NM_019717.2    | ATL2          | -0.710180684 |
| ILMN_2487426 | NM_175258.3    | RAPGEF6       | -0.710435553 |
| ILMN_1229589 | NM_172582.2    | COQ6          | -0.710737566 |
| ILMN_2688871 | NM_026698.2    | TMEM129       | -0.71075352  |
| ILMN_1231181 | NM_025664.5    | SNX9          | -0.710969724 |
| ILMN_1250309 | NM_001081150.1 | LONRF1        | -0.711201647 |
| ILMN_2681241 | NM_009689.1    | BIRC5         | -0.711724813 |
| ILMN_1214543 | XM_893628.1    | LOC628836     | -0.71182011  |
| ILMN_2732475 | NM_030564.1    | RNF34         | -0.711918106 |
| ILMN_3139405 | NM_001042593.1 | HBS1L         | -0.712769216 |
| ILMN_3068452 | NM_010829.2    | MSH3          | -0.713469857 |
| ILMN_2552983 |                | A130052C08RIK | -0.713471263 |
| ILMN_2719513 | NM_026228.2    | SLC39A8       | -0.713486901 |
| ILMN_2520380 | NM_027315.2    | UBE2Q1        | -0.714225008 |
| ILMN_1251085 |                | KIF17         | -0.714951208 |
| ILMN_2898878 | NM_011050.2    | PDCD4         | -0.714953954 |
| ILMN_3163476 | NM_181325.3    | SLC25A15      | -0.715241095 |
| ILMN_1219333 |                | 9830134K01RIK | -0.716259595 |
| ILMN_1215785 |                | BCL10         | -0.716607975 |
| ILMN_2626740 |                | TBP           | -0.716670261 |
| ILMN_1229238 | NM_019758.2    | MTCH2         | -0.716781371 |
| ILMN_2605556 | NM_172935.4    | AMDHD2        | -0.716817287 |
| ILMN_1235559 | NM_001081216.1 | PHIP          | -0.717454073 |
| ILMN_2725484 | NM_011061.1    | PADI4         | -0.717919877 |
| ILMN_2624100 | NM_008390.1    | IRF1          | -0.718075354 |
| ILMN_2581479 | NM_001081363.1 | CENPF         | -0.718824007 |
| ILMN_3052501 | NM_001033126.2 | CD27          | -0.718938318 |
| ILMN_2639454 | NM_021535.3    | SMU1          | -0.718984866 |
| ILMN_1231447 | NM_009415.1    | TPI1          | -0.719132287 |
| ILMN_2743487 |                | 1700009P03RIK | -0.719144956 |
| ILMN_1256052 | NM_011317.3    | KHDRBS1       | -0.719258316 |
| ILMN_2430513 | NM_010164.2    | EYA1          | -0.719729842 |
| ILMN_2717127 | NM_172689.3    | DDX58         | -0.720265854 |
| ILMN_2777836 | NM_008580.1    | MAP3K5        | -0.720784083 |
| ILMN_1239103 | NM_026445.2    | SUMF2         | -0.720820357 |
| ILMN_2766469 | NM_145533.1    | SMOX          | -0.721034862 |
| ILMN_1240380 | NM_001014973.1 | SNX13         | -0.721336719 |
| ILMN_1259436 | NM_023605.2    | FBXO9         | -0.722652455 |
| ILMN_1231573 | NM_025429.2    | SERPINB1A     | -0.72285535  |
| ILMN_1235833 | XM_001480577.1 | ZFP422-RS1    | -0.72310173  |
| ILMN_2760415 | NM_013854.1    | ABCF1         | -0.723300865 |
| ILMN_1221530 |                | ADCY7         | -0.723313632 |
| ILMN_1246564 | NM_153592.1    | ERLIN2        | -0.723430701 |
| ILMN_1236008 | XM_001475261.1 | ISOC2A        | -0.723829562 |
| ILMN_1224162 | NM_172543.2    | 5730593F17RIK | -0.724212893 |
| ILMN_2633942 | NM_153783.4    | PAOX          | -0.724249336 |

|              |                |               |              |
|--------------|----------------|---------------|--------------|
| ILMN_1239398 | XM_001476849.1 | LOC100046817  | -0.724355974 |
| ILMN_1220974 | NM_178640.2    | B3GALNT2      | -0.724503363 |
| ILMN_2659062 |                | ADD1          | -0.72454738  |
| ILMN_1235653 | NM_011358.1    | SFRS2         | -0.725626995 |
| ILMN_2972403 | NM_028747.1    | 0610012H03RIK | -0.725660582 |
| ILMN_1218670 |                | CSNK2A1-RS4   | -0.725944191 |
| ILMN_1227901 | XR_005107.2    | LOC674997     | -0.725957594 |
| ILMN_3040050 | NM_001077495.1 | PIK3R1        | -0.727135271 |
| ILMN_2691135 | NM_001081175.1 | ITPKB         | -0.727306659 |
| ILMN_1246471 | NM_009431.2    | CTR9          | -0.728005003 |
| ILMN_2590350 | NM_026454.3    | UBE2F         | -0.729790288 |
| ILMN_2555803 | NM_029420.3    | GIYD2         | -0.729866748 |
| ILMN_1240661 |                | IL18          | -0.730019688 |
| ILMN_2429800 | NM_009395.3    | TNFAIP1       | -0.731074266 |
| ILMN_1255400 | XM_987602.1    | LOC676124     | -0.731141772 |
| ILMN_2686603 | XM_001477157.1 | LOC100046406  | -0.731667291 |
| ILMN_2992239 | NM_007444.2    | AMD2          | -0.731671819 |
| ILMN_2724530 |                | PMM2          | -0.733002377 |
| ILMN_2974069 | NM_144902.3    | SLC35A3       | -0.733068406 |
| ILMN_1242767 | NM_010070.3    | DOK1          | -0.734143502 |
| ILMN_2628629 | NM_009864.2    | CDH1          | -0.73460664  |
| ILMN_2592779 | NM_172871.2    | KLHL9         | -0.734662236 |
| ILMN_1216015 | NM_133708.3    | GMPPA         | -0.734703475 |
| ILMN_2690460 | NM_178394.3    | JAKMIP1       | -0.734751937 |
| ILMN_2456216 |                | 5330403D14RIK | -0.735112576 |
| ILMN_2529900 | XM_619387.4    | UBXD7         | -0.735664074 |
| ILMN_2716014 | XR_032582.1    | LOC667609     | -0.736342888 |
| ILMN_2744789 | NM_030560.3    | BC003993      | -0.738662373 |
| ILMN_2537869 | XM_358981.1    | LOC385877     | -0.739283842 |
| ILMN_2628204 | NM_080288.1    | ELMO1         | -0.739324145 |
| ILMN_2761008 | NM_016739.2    | CAPRIN1       | -0.739888901 |
| ILMN_2605819 | NM_028133.1    | EGLN3         | -0.74034569  |
| ILMN_2724397 | NM_020573.1    | OSBPL1A       | -0.741362348 |
| ILMN_2905717 | NM_008533.2    | CD180         | -0.741737547 |
| ILMN_1257486 | NM_001082412.1 | MCART6        | -0.741914599 |
| ILMN_1246704 | NM_178650.3    | TBC1D10C      | -0.742065042 |
| ILMN_2667384 | NM_008135.4    | SLC6A9        | -0.742242015 |
| ILMN_2695281 | NM_133227.2    | NUP155        | -0.742659435 |
| ILMN_1217041 | NM_019388.2    | CD86          | -0.742749285 |
| ILMN_1229720 | NM_023764.3    | TOLLIP        | -0.743518219 |
| ILMN_2693461 | NM_024186.1    | SSBP2         | -0.743609273 |
| ILMN_1241258 |                | TENS1         | -0.743691744 |
| ILMN_3081402 | NM_001081293.1 | RPRD2         | -0.744084797 |
| ILMN_1232000 | NM_178637.1    | KAT5          | -0.744233698 |
| ILMN_3121851 | NM_001081458.1 | PPP2R5C       | -0.744277859 |
| ILMN_3156604 | NM_008252.2    | HMGB2         | -0.744709392 |

|              |                |               |              |
|--------------|----------------|---------------|--------------|
| ILMN_2692762 | NM_021392.3    | AP4M1         | -0.745284644 |
| ILMN_1222228 | NM_007415.2    | PARP1         | -0.74593618  |
| ILMN_2707319 | NM_145137.2    | MGL2          | -0.746071986 |
| ILMN_2598520 | NM_028611.2    | 2410091C18RIK | -0.746920277 |
| ILMN_2685234 | NM_053262.3    | HSD17B11      | -0.747102783 |
| ILMN_3071764 | NM_001033136.2 | 1200015F23RIK | -0.747365144 |
| ILMN_2526498 | XM_124355.4    | LOC230765     | -0.747770243 |
| ILMN_1216493 | NM_019879.2    | SUCLG1        | -0.74839004  |
| ILMN_2593143 | XM_129913.4    | DOCK10        | -0.748542283 |
| ILMN_1247864 | NM_001013577.1 | 1110054O05RIK | -0.748921038 |
| ILMN_3151722 | NM_019671.2    | NET1          | -0.748922429 |
| ILMN_2608229 | NM_138747.1    | NOL1          | -0.749601537 |
| ILMN_1235689 | NM_001039389.1 | WDR37         | -0.749952276 |
| ILMN_2633457 | NM_172401.2    | 1110057K04RIK | -0.751438624 |
| ILMN_1237736 | NM_175175.3    | PLEKHF2       | -0.752700274 |
| ILMN_1221341 | XR_033502.1    | LOC100047226  | -0.75319983  |
| ILMN_2749382 | NM_172310.1    | TARSL2        | -0.753451311 |
| ILMN_2598883 | NM_178627.3    | POLDIP3       | -0.753517184 |
| ILMN_2736168 | NM_008917.2    | PPT1          | -0.753707963 |
| ILMN_3092415 | NM_153198.1    | HBP1          | -0.753752914 |
| ILMN_2667784 | XM_135859.1    | MOSPD1        | -0.754245747 |
| ILMN_1247460 | NM_133752.2    | OPA1          | -0.754311933 |
| ILMN_2544890 |                | PDE4B         | -0.754356556 |
| ILMN_2626547 | NM_016881.2    | PMM2          | -0.754405569 |
| ILMN_2527895 | NM_146231.1    | ZFP825        | -0.754638557 |
| ILMN_1254837 | NM_009005.1    | RAB7          | -0.7557526   |
| ILMN_2542258 | XM_980899.2    | EG666009      | -0.756251675 |
| ILMN_2485323 | NM_133977.2    | TRF           | -0.756454482 |
| ILMN_2745036 | NM_024191.1    | ARL2BP        | -0.757193378 |
| ILMN_1218067 | XM_357564.1    | LOC384315     | -0.757322354 |
| ILMN_1213617 | NM_001038492.1 | CTSA          | -0.757408363 |
| ILMN_1246126 | NM_023858.2    | MTMR2         | -0.758343169 |
| ILMN_2420505 | NM_030559.2    | VPS16         | -0.758363573 |
| ILMN_2471634 | NM_172700.2    | ZMPSTE24      | -0.758886557 |
| ILMN_1245831 | NM_011994.2    | ABCD2         | -0.758900867 |
| ILMN_1230881 |                | A130090K04RIK | -0.758981511 |
| ILMN_2550040 |                | ZFP99         | -0.759474063 |
| ILMN_2709901 | NM_183392.2    | NUP54         | -0.760769783 |
| ILMN_2629993 | NM_144525.3    | TMEM214       | -0.760989375 |
| ILMN_2693459 | NM_024186.1    | SSBP2         | -0.761168282 |
| ILMN_1244272 | NM_013813.1    | EPB4.1L3      | -0.762049523 |
| ILMN_2754795 |                | BC034507      | -0.762834447 |
| ILMN_3006534 | NM_198609.2    | BC003885      | -0.762980782 |
| ILMN_1228657 | NM_010187.2    | FCGR2B        | -0.763089669 |
| ILMN_2756486 | NM_007472.2    | AQP1          | -0.763305366 |
| ILMN_3161936 | NM_008621.2    | MPP1          | -0.763399673 |

|              |                |               |              |
|--------------|----------------|---------------|--------------|
| ILMN_1251534 | NM_172540.1    | TRMT2B        | -0.764783749 |
| ILMN_3001076 | NM_030241.2    | SETD8         | -0.766380045 |
| ILMN_2457324 | NM_201357.1    | TSSC1         | -0.767141221 |
| ILMN_1216871 | NM_008879.3    | LCP1          | -0.767395292 |
| ILMN_2711401 | NM_027532.3    | 3200002M19RIK | -0.767500165 |
| ILMN_2674924 | NM_144844.1    | PCCA          | -0.768358188 |
| ILMN_2790373 | NM_009223.2    | SNN           | -0.768874742 |
| ILMN_1259424 | XM_147215.1    | ZFP288        | -0.769681245 |
| ILMN_1231390 | NM_053159.3    | MRPL3         | -0.770135777 |
| ILMN_2632942 | NM_009460.2    | SUMO1         | -0.770603559 |
| ILMN_2475376 |                | BC044804      | -0.770609857 |
| ILMN_1227353 | NM_025857.2    | 2310007F21RIK | -0.770825056 |
| ILMN_2679770 | NM_030116.2    | MRPL9         | -0.770925765 |
| ILMN_2651706 | NM_172442.2    | DTX4          | -0.771408658 |
| ILMN_1230858 |                | 9430065F12RIK | -0.771557668 |
| ILMN_2491469 |                | TENS1         | -0.771602199 |
| ILMN_2667190 | XM_203357.3    | LOC217328     | -0.771674464 |
| ILMN_2631763 | XM_357637.1    | LOC384419     | -0.772487208 |
| ILMN_1240830 | NM_207215.2    | MYCBP2        | -0.77415154  |
| ILMN_1250942 | NM_183417.2    | CDK2          | -0.774277125 |
| ILMN_2676606 | NM_181848.4    | OPTN          | -0.774768189 |
| ILMN_2663920 | NM_172656.5    | SYRADB        | -0.775074517 |
| ILMN_1233292 |                | E230020O17RIK | -0.775787004 |
| ILMN_2748321 | NM_053269.2    | RAD51C        | -0.776151864 |
| ILMN_1220313 | NM_013818.2    | GTPBP1        | -0.776989079 |
| ILMN_2666492 | NM_173036.2    | GPR97         | -0.777030885 |
| ILMN_1232740 |                | E130301L11RIK | -0.777370714 |
| ILMN_2694782 | XM_134948.5    | 2410076I21RIK | -0.777723622 |
| ILMN_2599018 | NM_013885.2    | CLIC4         | -0.777820768 |
| ILMN_2721413 | NM_153081.2    | SLC16A11      | -0.77868053  |
| ILMN_2696826 |                | 1700065A05RIK | -0.778927988 |
| ILMN_1252719 | NM_025375.2    | WBSCR22       | -0.779243574 |
| ILMN_1230440 |                | 1700041B20RIK | -0.779393858 |
| ILMN_2759943 | NM_011203.2    | PTPN12        | -0.77945397  |
| ILMN_2755224 | NM_028023.3    | CDCA4         | -0.779536771 |
| ILMN_3021192 | NM_001081094.1 | ZNHIT6        | -0.780207532 |
| ILMN_1224670 | NM_019480.4    | EBAG9         | -0.7806121   |
| ILMN_1251769 | XM_485297.4    | EG433643      | -0.781320884 |
| ILMN_1238612 | NM_030743.5    | RNF114        | -0.782218721 |
| ILMN_2527837 | XM_141432.3    | LOC241715     | -0.782840396 |
| ILMN_2615575 | NM_198642.1    | 5031414D18RIK | -0.782913106 |
| ILMN_1217642 |                | A430103M24RIK | -0.783564403 |
| ILMN_2632299 | NM_010273.3    | GDI1          | -0.783746635 |
| ILMN_2543834 |                | RFC3          | -0.783836095 |
| ILMN_1221684 | NM_011327.2    | SCP2          | -0.784055601 |
| ILMN_2626309 | NM_026434.3    | RBM18         | -0.784106831 |

|              |                |               |                     |
|--------------|----------------|---------------|---------------------|
| ILMN_1258197 |                | D230004N01RIK | -0.784250512        |
| ILMN_1260571 | NM_001076554.1 | SPNA2         | -0.786008145        |
| ILMN_2737826 | NM_030147.2    | BRD8          | -0.787151752        |
| ILMN_2777293 | NM_133880.1    | PAFAH2        | -0.787399392        |
| ILMN_2584490 | NM_001081225.1 | FAM178A       | -0.787678744        |
| ILMN_1257307 |                | E230027K01RIK | -0.788139488        |
| ILMN_2960774 | NM_146203.2    | ZFP764        | -0.788746424        |
| ILMN_2548634 |                | 4833416I09RIK | -0.791119743        |
| ILMN_1239065 |                | SLC35A3       | -0.791122836        |
| ILMN_2631934 | NM_144906.1    | SGIP1         | -0.792428344        |
| ILMN_1242946 | XM_001479142.1 | LOC629364     | -0.792467871        |
| ILMN_2645074 | NM_011615.2    | DEDD          | -0.793067325        |
| ILMN_2770917 |                | BLVRB         | -0.793789528        |
| ILMN_2551339 |                | A430106H13RIK | -0.795091092        |
| ILMN_2530434 | XM_128427.3    | LOC224532     | -0.795608259        |
| ILMN_3135781 | NM_013470.1    | ANXA3         | -0.795813678        |
| ILMN_2676940 | NM_020575.2    |               | March7 -0.795994838 |
| ILMN_1226745 | NM_029721.1    | SNX27         | -0.796420862        |
| ILMN_2524723 | XM_125812.4    | 2810470D21RIK | -0.796619798        |
| ILMN_3022428 | NM_001080129.1 | TMPO          | -0.797101741        |
| ILMN_1247407 | NM_030241.2    | SETD8         | -0.797108861        |
| ILMN_2803921 | NM_010742.1    | LY6D          | -0.797194371        |
| ILMN_2678547 | NM_008866.2    | LYPLA1        | -0.797926606        |
| ILMN_1253259 | NM_029721.1    | SNX27         | -0.798117672        |
| ILMN_1219231 | NM_001042541.1 | AKAP1         | -0.79843553         |
| ILMN_3029178 | NM_001077189.1 | FCGR2B        | -0.798618381        |
| ILMN_1229534 | NM_027445.1    | RNF167        | -0.798831335        |
| ILMN_2790382 | NM_010278.1    | GFI1          | -0.799109547        |
| ILMN_1213454 | NM_153116.1    | GTPBP10       | -0.799578953        |
| ILMN_1259198 | NM_029626.1    | GLT8D1        | -0.800451405        |
| ILMN_2754690 | NM_025862.2    | ACAD8         | -0.802457138        |
| ILMN_2588051 | NM_023716.1    | TUBB2B        | -0.802798396        |
| ILMN_2693594 | NM_013854.1    | ABCF1         | -0.803088284        |
| ILMN_1231884 | NM_153776.2    | TMEM121       | -0.803191833        |
| ILMN_2530127 | XM_289869.2    | LOC333751     | -0.803637016        |
| ILMN_3078143 | NM_001048148.1 | ZGPAT         | -0.803860052        |
| ILMN_2533143 | XM_134040.5    | LOC234081     | -0.804386489        |
| ILMN_2615110 | NM_025617.2    | 2210012G02RIK | -0.804740572        |
| ILMN_1235122 | XM_001479122.1 | LOC100047915  | -0.805882434        |
| ILMN_1213975 | NM_021530.2    | SLC4A8        | -0.806817744        |
| ILMN_2428961 | NM_133216.2    | XPNPEP1       | -0.806864124        |
| ILMN_1239784 | NM_153116.1    | GTPBP10       | -0.807187865        |
| ILMN_1231340 | XM_126634.3    | 1110012N22RIK | -0.807801259        |
| ILMN_2518062 | NM_001001806.2 | ZFP36L2       | -0.807804326        |
| ILMN_2745480 | NM_010200.2    | FGF13         | -0.808061395        |
| ILMN_1250182 | NM_001081373.1 | CEP164        | -0.808156503        |

|              |                |               |              |
|--------------|----------------|---------------|--------------|
| ILMN_1234324 | NM_001033222.2 | PDZD8         | -0.808440194 |
| ILMN_2432039 | NM_198416.1    | ZZZ3          | -0.808571879 |
| ILMN_2698606 | NM_134020.1    | TMED4         | -0.80999148  |
| ILMN_1220889 | NM_008676.1    | NBR1          | -0.810425749 |
| ILMN_2723997 | NM_146218.4    | RFWD3         | -0.810897246 |
| ILMN_2552900 |                | ADD2          | -0.811336689 |
| ILMN_1229847 | NM_172382.1    | JMJD2A        | -0.811630897 |
| ILMN_2572489 |                | E330031I04RIK | -0.812304449 |
| ILMN_1237234 | NM_172310.1    | TARSL2        | -0.812321302 |
| ILMN_2568571 |                | C130079K02RIK | -0.812421661 |
| ILMN_2428963 | NM_133216.2    | XPNPEP1       | -0.812767646 |
| ILMN_1218226 | NM_145977.1    | SLC45A3       | -0.812795516 |
| ILMN_2965903 | NM_008230.4    | HDC           | -0.813230401 |
| ILMN_1219278 |                | E130306F01RIK | -0.813448567 |
| ILMN_3112837 | NM_029826.2    | HDHD2         | -0.813632339 |
| ILMN_2427307 | NM_027711.1    | IQGAP2        | -0.815667024 |
| ILMN_2747456 | NM_054102.2    | IVNS1ABP      | -0.815760566 |
| ILMN_2623526 | NM_010849.4    | MYC           | -0.8160864   |
| ILMN_1254019 | NM_011269.1    | RHAG          | -0.816395284 |
| ILMN_1232998 |                | D830005N24RIK | -0.81641038  |
| ILMN_2662743 | NM_009010.4    | RAD23A        | -0.816604529 |
| ILMN_1245860 | NM_024193.2    | NOL5A         | -0.817169199 |
| ILMN_1260248 | NM_133659.2    | ERG           | -0.817802735 |
| ILMN_2671984 | NM_011210.2    | PTPRC         | -0.818005992 |
| ILMN_2702767 | NM_011895.2    | SLC35A1       | -0.818122236 |
| ILMN_2677047 | NM_025878.1    | MRPS18B       | -0.81828436  |
| ILMN_3105563 | NM_172899.2    | DMKN          | -0.819082058 |
| ILMN_1257653 |                | F630107L03RIK | -0.819161904 |
| ILMN_1232341 | NM_172505.1    | A730008H23RIK | -0.819308488 |
| ILMN_2527975 | XM_122655.5    | LOC218696     | -0.819455683 |
| ILMN_1243942 | NM_009615.5    | ADAM17        | -0.819516476 |
| ILMN_1220637 | NM_001042653.1 | OIP5          | -0.819526946 |
| ILMN_2725789 | NM_011317.3    | KHDRBS1       | -0.820005468 |
| ILMN_2624286 | NM_008395.2    | ITCH          | -0.820373201 |
| ILMN_2444616 | NM_025652.2    | GTF3A         | -0.820471777 |
| ILMN_1246359 | XR_033125.1    | LOC100047009  | -0.821018714 |
| ILMN_2566501 |                | E130301I04RIK | -0.821324228 |
| ILMN_2524489 | XM_128950.4    | 2310036I02RIK | -0.821673757 |
| ILMN_1248376 | NM_029475.1    | ADAL          | -0.82170534  |
| ILMN_1254257 | NM_133768.1    | ASL           | -0.821749522 |
| ILMN_3045359 | NM_008906.3    | CTSA          | -0.82218662  |
| ILMN_1223045 | NM_026515.2    | 2810417H13RIK | -0.822303018 |
| ILMN_2576336 |                | C130052O15RIK | -0.823057736 |
| ILMN_1216473 | NM_029582.2    | TXNDC11       | -0.823158702 |
| ILMN_1252970 | NM_009201.1    | SLC1A5        | -0.823755149 |
| ILMN_1243621 |                | A130026C10RIK | -0.823832464 |

|              |                |               |              |
|--------------|----------------|---------------|--------------|
| ILMN_2493791 | XM_001475674.1 | LOC100045971  | -0.824591115 |
| ILMN_2646230 | NM_022994.2    | DAP3          | -0.824912472 |
| ILMN_1221940 | NM_028982.3    | 8430419L09RIK | -0.825238813 |
| ILMN_2577039 | NM_207530.2    | OSBPL1A       | -0.825918769 |
| ILMN_2636832 | NM_029787.2    | CYB5R3        | -0.826565169 |
| ILMN_1227647 | NM_001005523.1 | RSRC2         | -0.826616593 |
| ILMN_2591502 | NM_183306.1    | A130052D22    | -0.826730495 |
| ILMN_2686132 | NM_007398.3    | ADA           | -0.82740587  |
| ILMN_2668576 | NM_175238.5    | RIF1          | -0.827481746 |
| ILMN_2496121 |                | 2600001B17RIK | -0.827769756 |
| ILMN_1244297 | NM_138677.2    | EDEM1         | -0.828824983 |
| ILMN_1252214 | NM_021514.3    | PFKM          | -0.828872832 |
| ILMN_1231332 | NM_001081133.2 | KIF16B        | -0.829019354 |
| ILMN_2756704 | NM_145562.2    | 9130213B05RIK | -0.829964596 |
| ILMN_1254813 | NM_009471.2    | UMPS          | -0.830255581 |
| ILMN_3163486 | NM_001033432.3 | HECA          | -0.830396523 |
| ILMN_1258652 |                | RBBP2         | -0.831569707 |
| ILMN_1224780 | NM_001039175.1 | ELOVL1        | -0.83198602  |
| ILMN_1246650 | NM_008302.3    | HSP90AB1      | -0.832177246 |
| ILMN_2672035 | NM_027159.1    | CCDC115       | -0.832324679 |
| ILMN_2711615 | NM_008362.1    | IL1R1         | -0.833015654 |
| ILMN_2755195 | NM_019567.2    | ACIN1         | -0.833611417 |
| ILMN_3094886 | NM_001077193.1 | ABI1          | -0.833611864 |
| ILMN_1215796 | XM_001476583.1 | LOC100046608  | -0.833818417 |
| ILMN_2931096 | NM_010515.1    | IGF2R         | -0.8341816   |
| ILMN_2440814 | NM_013673.3    | SP100         | -0.834602092 |
| ILMN_2683718 | NM_028233.2    | LRPPRC        | -0.835164139 |
| ILMN_2691177 | NM_011307.1    | UIMC1         | -0.836879403 |
| ILMN_2654197 | NM_133910.2    | TBC1D14       | -0.837929351 |
| ILMN_2685569 | NM_028304.2    | PUS10         | -0.838308506 |
| ILMN_3114632 | NM_181324.2    | DDX6          | -0.838312799 |
| ILMN_2890515 | NM_008741.1    | NSG2          | -0.838367176 |
| ILMN_1227401 | XM_915565.3    | BAZ1A         | -0.838716211 |
| ILMN_2822229 | NM_172554.1    | ZDHHC17       | -0.838995578 |
| ILMN_1243473 |                | B930066N23RIK | -0.839690379 |
| ILMN_2445848 | NM_013915.3    | ZFP238        | -0.840029464 |
| ILMN_3042324 | NM_001013391.1 | CPSF6         | -0.841249548 |
| ILMN_2702215 | NM_013506.1    | EIF4A2        | -0.841323462 |
| ILMN_1237003 | NM_148673.3    | SLU7          | -0.841659515 |
| ILMN_1245761 | NM_145414.2    | NSUN5         | -0.841666334 |
| ILMN_2588362 | NM_026560.3    | CDCA8         | -0.841823693 |
| ILMN_1217480 | XM_001475418.1 | LOC100046080  | -0.842047213 |
| ILMN_1247626 | NM_020577.2    | AS3MT         | -0.842975826 |
| ILMN_2594180 | NM_001081128.2 | MTR           | -0.843177755 |
| ILMN_2725402 | NM_010941.3    | NSDHL         | -0.8432563   |
| ILMN_2717569 | NM_138668.1    | UFSP2         | -0.843687823 |



|              |                |                 |              |
|--------------|----------------|-----------------|--------------|
| ILMN_1238069 | NM_172450.3    | 4930539E08RIK   | -0.844150918 |
| ILMN_1252514 |                | C920016N10RIK   | -0.844530186 |
| ILMN_1221442 | XM_135857.4    | UTP14A          | -0.844698165 |
| ILMN_3134078 | NM_021516.1    | MARK3           | -0.84484028  |
| ILMN_2640239 | NM_172574.1    | PQLC3           | -0.845041482 |
| ILMN_2735080 | NM_028768.2    | ARMC8           | -0.845841161 |
| ILMN_1243080 | NM_001001176.1 | TAF9B           | -0.845860291 |
| ILMN_1215332 | XM_122761.3    | LOC219145       | -0.846345449 |
| ILMN_2617433 | NM_007393.1    | ACTB            | -0.846410957 |
| ILMN_3035162 | NM_133220.2    | SGK3            | -0.847039088 |
| ILMN_1220441 | NM_177343.3    | CAMK1D          | -0.847322143 |
| ILMN_2756286 | NM_172585.2    | LARP5           | -0.848069766 |
| ILMN_2468327 |                | JMJD2A          | -0.848324254 |
| ILMN_2641613 | NM_009211.2    | SMARCC1         | -0.848644478 |
| ILMN_1212768 | XR_033380.1    | LOC545750       | -0.849046801 |
| ILMN_1241035 | NM_133839.2    | 2010311D03RIK   | -0.849686138 |
| ILMN_1252761 | NM_007879.1    | DRG1            | -0.849797905 |
| ILMN_2686296 | XM_354675.1    | ARID4A          | -0.850472885 |
| ILMN_1246027 | NM_016962.1    | SPAST           | -0.850774397 |
| ILMN_2514631 | XM_358429.1    | SCL0002315.1_12 | -0.851844609 |
| ILMN_2752569 | NM_145457.3    | PAIP1           | -0.85216552  |
| ILMN_2651715 | NM_009465.3    | AXL             | -0.852260039 |
| ILMN_3043669 | NM_009192.2    | SLA             | -0.852878731 |
| ILMN_1218127 | XM_484933.5    | PCP4L1          | -0.853995814 |
| ILMN_2743517 | NM_011159.1    | PRKDC           | -0.854480297 |
| ILMN_1225522 | NM_019828.1    | TRPC4AP         | -0.855048932 |
| ILMN_2886162 | NM_001033219.1 | SLC45A4         | -0.855952027 |
| ILMN_2616422 | NM_172398.3    | 2310005E10RIK   | -0.856172045 |
| ILMN_2491859 | NM_053273.1    | TTYH2           | -0.856583537 |
| ILMN_2756957 | NM_172291.1    | FOXRED1         | -0.857022285 |
| ILMN_2631423 | NM_207105.2    | H2-AB1          | -0.857366013 |
| ILMN_2684909 | NM_181586.2    | SIRT6           | -0.858061283 |
| ILMN_2761689 |                | PSEN1           | -0.858475377 |
| ILMN_2456730 | NM_177823.3    | UBASH3A         | -0.858825659 |
| ILMN_1217552 | NM_009572.3    | ZHX1            | -0.85883568  |
| ILMN_3154419 | NM_133200.3    | P2RY14          | -0.859091784 |
| ILMN_2742937 | NM_021530.2    | SLC4A8          | -0.859391573 |
| ILMN_1232922 | NM_026213.3    | TTC33           | -0.859760078 |
| ILMN_2666491 | NM_173036.2    | GPR97           | -0.860343494 |
| ILMN_3161500 | NM_001033780.2 | I830077J02RIK   | -0.860408946 |
| ILMN_2621122 | NM_180600.2    | UBE2Q2          | -0.861746075 |
| ILMN_2493851 | NM_011750.1    | SF1             | -0.862049359 |
| ILMN_2626535 | NM_148929.2    | SLC9A8          | -0.862356474 |
| ILMN_2495363 | NM_153423.5    | WASF2           | -0.863278142 |
| ILMN_2694569 | XM_982144.1    | LOC631037       | -0.86330486  |
| ILMN_2482555 | NM_152234.1    | UBQLN1          | -0.863357603 |

|              |                |                 |              |
|--------------|----------------|-----------------|--------------|
| ILMN_2730701 | NM_172574.1    | PQLC3           | -0.863534492 |
| ILMN_2586462 |                | ADPRT2          | -0.863567744 |
| ILMN_2726055 |                | SHMT1           | -0.863755949 |
| ILMN_2651273 | NM_011396.2    | SLC22A5         | -0.863780406 |
| ILMN_1234126 | NM_016893.4    | FUT8            | -0.863914008 |
| ILMN_2545383 |                | 4931433E08RIK   | -0.863935772 |
| ILMN_2662192 | NM_026240.2    | GRAMD3          | -0.864111832 |
| ILMN_1254513 |                | 4930553M18RIK   | -0.864771961 |
| ILMN_2731454 | NM_007965.2    | EVL             | -0.865215113 |
| ILMN_2759945 | NM_011203.2    | PTPN12          | -0.866025601 |
| ILMN_1223363 | XM_133979.7    | PPFIA1          | -0.866603555 |
| ILMN_2734152 | NM_033270.1    | E2F6            | -0.867003099 |
| ILMN_2750098 | NM_134078.3    | CHMP7           | -0.867097245 |
| ILMN_2702703 | NM_028230.3    | SHMT2           | -0.867142259 |
| ILMN_1215341 | NM_027166.5    | YPEL5           | -0.867638571 |
| ILMN_2888144 | NM_022880.1    | SLC29A1         | -0.867997492 |
| ILMN_2625058 | NM_133714.4    | 2310037I24RIK   | -0.868468529 |
| ILMN_2645333 | NM_010400.2    | H60A            | -0.868928304 |
| ILMN_2600365 | NM_025325.2    | HAAO            | -0.870157775 |
| ILMN_2730999 | NM_139305.2    | CAR9            | -0.870763416 |
| ILMN_1245789 | NM_001037134.1 | CCNE2           | -0.871953714 |
| ILMN_1212625 | NM_001005767.3 | PARL            | -0.87244453  |
| ILMN_2596907 | NM_009358.2    | PPP2R5D         | -0.873056081 |
| ILMN_1238661 | NM_013718.2    | TRAPPC3         | -0.87367497  |
| ILMN_1230221 | NM_133714.4    | 2310037I24RIK   | -0.873841289 |
| ILMN_1231083 | XR_035632.1    | LOC624083       | -0.87452618  |
| ILMN_2545407 |                | 4933401P20RIK   | -0.875102415 |
| ILMN_2697790 | NM_201230.4    | FGFR1OP         | -0.875406948 |
| ILMN_2715304 | NM_026267.1    | NECAP1          | -0.878153224 |
| ILMN_2736094 | NM_020560.1    | MRPS31          | -0.878377789 |
| ILMN_1214762 | NM_177547.3    | SGK3            | -0.879010734 |
| ILMN_1238102 |                | IDE             | -0.879324185 |
| ILMN_2606564 | NM_026195.2    | ATIC            | -0.879610332 |
| ILMN_1231176 | NM_053173.2    | KIFC1           | -0.880287852 |
| ILMN_1219583 | NM_009794.1    | CAPN2           | -0.880792572 |
| ILMN_1215363 | AK014004.1     | SCL0004029.1_17 | -0.881993159 |
| ILMN_2628591 | XR_033125.1    | LOC100047009    | -0.882155211 |
| ILMN_3061663 | NM_009277.3    | TRIM21          | -0.882585112 |
| ILMN_3014257 | NM_029334.1    | ZC3H14          | -0.883176921 |
| ILMN_2477213 | XM_001473915.1 | LOC100045240    | -0.884389188 |
| ILMN_2588663 | NM_029582.2    | TXNDC11         | -0.884811189 |
| ILMN_1246790 | NM_007690.2    | CHD1            | -0.885213778 |
| ILMN_2422743 |                | TOR3A           | -0.885327744 |
| ILMN_1229383 |                | ATP8B4          | -0.885667724 |
| ILMN_1217389 | NM_001039050.1 | PKIB            | -0.885853292 |
| ILMN_1230667 | NM_029705.2    | ATXN3           | -0.886013934 |

|              |                |                 |              |
|--------------|----------------|-----------------|--------------|
| ILMN_2960822 | NM_001008551.1 | BC085271        | -0.887087858 |
| ILMN_2537734 | XM_358812.1    | LOC385632       | -0.887528812 |
| ILMN_1221892 |                | C130064E22RIK   | -0.887822168 |
| ILMN_3138674 | NM_009637.3    | AEBP2           | -0.889317137 |
| ILMN_2649068 | NM_008390.1    | IRF1            | -0.889413417 |
| ILMN_1213958 | NM_009147.2    | SEC23A          | -0.889554408 |
| ILMN_2591342 | NM_144869.2    | BC021614        | -0.889557747 |
| ILMN_2659108 | NM_146081.1    | PPP4R1          | -0.890209133 |
| ILMN_2667618 | NM_017478.2    | COPG2           | -0.890625446 |
| ILMN_1244239 |                | BC027246        | -0.891161379 |
| ILMN_1226334 |                | MRPS18B         | -0.891281405 |
| ILMN_2669034 | NM_013853.1    | ABCF2           | -0.891637027 |
| ILMN_1249269 | NM_145412.3    | 5830457O10RIK   | -0.892835657 |
| ILMN_3139875 | NM_012006.2    | ACOT1           | -0.893019843 |
| ILMN_3084087 | NM_001039511.1 | IVNS1ABP        | -0.893185754 |
| ILMN_2778043 | NM_010708.1    | LGALS9          | -0.893650641 |
| ILMN_2761128 | NM_001081960.1 | CLASP2          | -0.893901604 |
| ILMN_2628567 | NM_013750.1    | PHLDA3          | -0.893940158 |
| ILMN_1256103 | NM_173763.3    | CCBL2           | -0.894953997 |
| ILMN_2616801 | NR_002888.2    | VMN2R-PS14      | -0.895758554 |
| ILMN_1227862 | NM_001081345.1 | CHD2            | -0.896043465 |
| ILMN_2675523 | NM_026232.3    | SLC25A30        | -0.897371382 |
| ILMN_1228534 | NM_007998.5    | FECH            | -0.89752158  |
| ILMN_1234329 |                | 1300006C19RIK   | -0.897960239 |
| ILMN_2747070 | NM_010236.1    | FPGS            | -0.898127764 |
| ILMN_3041839 | NM_024221.3    | PDHB            | -0.898129386 |
| ILMN_2752009 | NM_008565.2    | MCM4            | -0.898430418 |
| ILMN_2459219 | NM_025325.2    | HAAO            | -0.898735628 |
| ILMN_1244600 | NM_001040396.2 | 2810407C02RIK   | -0.898842018 |
| ILMN_1227324 | NM_011159.2    | PRKDC           | -0.898890877 |
| ILMN_1235735 | NM_023908.2    | SLCO3A1         | -0.89903281  |
| ILMN_2749955 | NM_028018.1    | 2400003C14RIK   | -0.89919859  |
| ILMN_2646891 | XM_001001363.1 | CENTD1          | -0.899243364 |
| ILMN_3029953 | NM_145556.3    | TARDBP          | -0.900948688 |
| ILMN_3142440 | NM_019565.3    | ZFP386          | -0.901004028 |
| ILMN_2434811 | AK053156.1     | SCL0002720.1_68 | -0.901032606 |
| ILMN_2502471 | XM_994662.1    | BC023892        | -0.901699331 |
| ILMN_2619773 |                | PEBP2AB         | -0.902062453 |
| ILMN_3154869 | NM_212450.1    | CTDSPL2         | -0.90228387  |
| ILMN_1255902 |                | 2500002A22RIK   | -0.90234767  |
| ILMN_3006790 | NM_152803.3    | HPSE            | -0.904505514 |
| ILMN_2651197 | NM_011203.2    | PTPN12          | -0.905805912 |
| ILMN_1260070 | NM_029475.1    | ADAL            | -0.906312791 |
| ILMN_2594521 | NM_010941.3    | NSDHL           | -0.907298346 |
| ILMN_1247582 | NM_015782.2    | SNRPA           | -0.907552458 |
| ILMN_2648704 | NM_198429.1    | NFATC1          | -0.908184136 |

|              |                |                 |              |
|--------------|----------------|-----------------|--------------|
| ILMN_1249749 | NM_010948.1    | NUDC            | -0.908957352 |
| ILMN_1220049 | AK041119.1     | SCL0001534.1_16 | -0.909037491 |
| ILMN_2523844 | NM_009628.2    | ADNP            | -0.909698224 |
| ILMN_2617090 | NM_053207.1    | EGLN1           | -0.910165163 |
| ILMN_2961042 | NM_001081202.1 | L1TD1           | -0.910284416 |
| ILMN_2594525 | NM_010941.3    | NSDHL           | -0.910777472 |
| ILMN_2497581 | NM_010931.2    | UHRF1           | -0.910913936 |
| ILMN_2440125 |                | USMG3           | -0.911322559 |
| ILMN_1218353 | XM_354599.1    | 1500041B16RIK   | -0.911400371 |
| ILMN_3046836 | NM_011507.1    | SUCLG2          | -0.911795141 |
| ILMN_2527129 | XM_287286.2    | LOC329750       | -0.911960186 |
| ILMN_3004177 | NM_027918.1    | 1300017J02RIK   | -0.912005194 |
| ILMN_2671829 | NM_146091.3    | ATL3            | -0.912397734 |
| ILMN_1239878 | NM_178372.2    | PRSS34          | -0.912716233 |
| ILMN_2654003 | XM_128698.5    | 2610024N24RIK   | -0.913098448 |
| ILMN_3109728 | NM_172264.1    | CHDH            | -0.913234976 |
| ILMN_1252488 | NM_020257.1    | CLEC2I          | -0.913440235 |
| ILMN_2673768 | NM_029839.2    | TRUB1           | -0.914355515 |
| ILMN_2575324 | NM_001081282.1 | IBTK            | -0.914652396 |
| ILMN_2608052 | NM_145533.1    | SMOX            | -0.915249602 |
| ILMN_2753226 |                | RAD51AP1        | -0.915302216 |
| ILMN_1239110 | NM_007907.1    | EEF2            | -0.915490696 |
| ILMN_1233348 | NM_133687.2    | CXXC5           | -0.916232495 |
| ILMN_2750265 | NM_080288.1    | ELMO1           | -0.916464327 |
| ILMN_1254564 |                | 3830432E14RIK   | -0.917457743 |
| ILMN_2665364 | NM_177547.2    | SGK3            | -0.918267815 |
| ILMN_1250136 | XR_034042.1    | LOC433943       | -0.920328294 |
| ILMN_2612738 | NM_026504.2    | COQ5            | -0.920497949 |
| ILMN_3045217 | NM_001081340.1 | SETD2           | -0.921180208 |
| ILMN_1257510 | XM_001479207.1 | LOC100042970    | -0.923035822 |
| ILMN_1256085 |                | IL10RB          | -0.923122906 |
| ILMN_1232195 | NM_152808.2    | SLC44A2         | -0.923218769 |
| ILMN_2707400 | NM_010561.1    | ILF3            | -0.923614815 |
| ILMN_2649828 | NM_011949.2    | MAPK1           | -0.924421187 |
| ILMN_1225532 | XM_903562.1    | EG386506        | -0.924464129 |
| ILMN_1244530 |                | E330011I20RIK   | -0.925201967 |
| ILMN_1231873 | NM_019770.2    | TMED2           | -0.925933282 |
| ILMN_1230273 | NM_009531.2    | XPC             | -0.927262615 |
| ILMN_2686327 | NM_019521.2    | GAS6            | -0.928147366 |
| ILMN_1221204 | NM_011847.1    | DNAJB6          | -0.928760744 |
| ILMN_3154007 | NM_201244.1    | COPG            | -0.928825692 |
| ILMN_2494397 | NM_001039158.1 | UBE2J2          | -0.929010859 |
| ILMN_2615035 | NM_025569.1    | MGST3           | -0.929364262 |
| ILMN_2550291 |                | 2310032M22RIK   | -0.931257465 |
| ILMN_2605566 | NM_001085408.1 | SDCCAG3         | -0.933222852 |
| ILMN_1231072 |                | A630082K20RIK   | -0.933483222 |

|              |                |               |              |
|--------------|----------------|---------------|--------------|
| ILMN_1245795 | NM_145542.3    | AHCYL1        | -0.933508001 |
| ILMN_1227920 | NM_018736.2    | MRE11A        | -0.934131126 |
| ILMN_2751539 | NM_001098227.1 | SDCBP         | -0.935383417 |
| ILMN_2692484 |                | KLHL5         | -0.935439437 |
| ILMN_2578773 |                | C230091E03RIK | -0.93572573  |
| ILMN_2860242 | NM_029436.3    | KLHL24        | -0.935879765 |
| ILMN_2482026 | NM_025985.4    | UBE2G1        | -0.93607961  |
| ILMN_2637792 | NM_009968.1    | CRYZ          | -0.937633677 |
| ILMN_2776431 | NM_007572.2    | C1QA          | -0.93814672  |
| ILMN_1238094 | NM_178667.3    | TFDP2         | -0.939071142 |
| ILMN_1240728 | NM_172628.2    | SH3TC2        | -0.939554105 |
| ILMN_1219914 | XM_485435.3    | LOC433749     | -0.940480143 |
| ILMN_2504544 |                | MT-ND5        | -0.940559033 |
| ILMN_2606567 | NM_026195.1    | ATIC          | -0.9406245   |
| ILMN_3129825 | NM_001039078.2 | PROSC         | -0.941453038 |
| ILMN_2499058 | NM_011665.3    | UBE2I         | -0.941759235 |
| ILMN_3032560 | NM_008202.2    | SLC39A7       | -0.941780608 |
| ILMN_2755258 | NM_007834.2    | DSCR3         | -0.941922035 |
| ILMN_2707198 | NM_020577.1    | AS3MT         | -0.94239016  |
| ILMN_1233733 | NM_008302.3    | HSP90AB1      | -0.943038502 |
| ILMN_2600198 | NM_153416.1    | AAAS          | -0.943374556 |
| ILMN_2616497 | NM_130881.2    | PABPC4        | -0.943856161 |
| ILMN_2944546 | NM_146218.2    | RFWD3         | -0.944778312 |
| ILMN_2653696 |                | ABCD3         | -0.945120582 |
| ILMN_3060454 | NM_001080774.1 | MYO1C         | -0.945397084 |
| ILMN_1258242 | NM_026507.2    | 2310031L18RIK | -0.94600852  |
| ILMN_1215336 | XM_001480577.1 | ZFP422-RS1    | -0.946735188 |
| ILMN_2696199 | NM_054057.1    | PROSC         | -0.94790126  |
| ILMN_1241915 | NM_008714.2    | NOTCH1        | -0.948694019 |
| ILMN_2506144 | NM_019806.5    | VAPB          | -0.949236544 |
| ILMN_2692482 |                | KLHL5         | -0.950960591 |
| ILMN_1249680 | NM_080288.1    | ELMO1         | -0.951023637 |
| ILMN_2429754 | NM_030743.3    | ZFP313        | -0.951477868 |
| ILMN_2745055 | NM_080288.1    | ELMO1         | -0.955504996 |
| ILMN_2753323 | NM_145625.1    | EIF4B         | -0.955560715 |
| ILMN_1238479 | NM_025569.1    | MGST3         | -0.957418005 |
| ILMN_1250472 | NM_080288.1    | ELMO1         | -0.959005556 |
| ILMN_1240406 |                | D130059O18RIK | -0.959415571 |
| ILMN_1231851 | NM_008813.3    | ENPP1         | -0.960353243 |
| ILMN_2768053 | NM_033618.3    | SUPT16H       | -0.960884061 |
| ILMN_2832608 | NM_027534.1    | FVT1          | -0.961236434 |
| ILMN_3115640 | NM_029320.2    | PIBF1         | -0.961412543 |
| ILMN_2763602 | NM_021500.2    | MAEA          | -0.962089897 |
| ILMN_2541035 | XM_358686.1    | LOC381996     | -0.963274964 |
| ILMN_1225876 | NM_152822.2    | LAS1L         | -0.963449863 |
| ILMN_2771349 | NM_021446.2    | 0610007P14RIK | -0.963507866 |

|              |                |                |              |
|--------------|----------------|----------------|--------------|
| ILMN_2511401 | NM_025924.2    | UPF3A          | -0.964630352 |
| ILMN_2609197 | NM_133219.1    | GCNT2          | -0.964919042 |
| ILMN_2590349 |                | 2510010F15RIK  | -0.965834482 |
| ILMN_1218668 | NM_007594.3    | CALU           | -0.966097088 |
| ILMN_1237527 | NM_021525.2    | RCL1           | -0.966179364 |
| ILMN_2491860 | NM_053273.2    | TTYH2          | -0.966248323 |
| ILMN_2625645 | XM_358313.1    | BC018507       | -0.967949106 |
| ILMN_1222385 | NM_145436.2    | CDC27          | -0.968418583 |
| ILMN_2452255 | XM_001002526.2 | IRF2BP2        | -0.968469006 |
| ILMN_2716527 | NM_207692.1    | MAPK9          | -0.969254478 |
| ILMN_1242714 | NM_001004436.3 | WAPAL          | -0.969685909 |
| ILMN_1233060 | NM_001081321.1 | PDS5A          | -0.969750102 |
| ILMN_1234999 | XM_916605.2    | CENPF          | -0.969772376 |
| ILMN_2550952 |                | IK             | -0.96980587  |
| ILMN_2746075 | NM_027874.2    | CSNK1D         | -0.969899719 |
| ILMN_2661107 | NM_178050.3    | ATL2           | -0.969939224 |
| ILMN_2529953 | XM_925022.2    | GM1752         | -0.970415528 |
| ILMN_1220022 | NM_153783.4    | PAOX           | -0.970443974 |
| ILMN_2542048 | XM_356566.1    | LOC382555      | -0.972427907 |
| ILMN_2588055 | NM_007393.3    | ACTB           | -0.972497089 |
| ILMN_2549077 |                | 4930512K19RIK  | -0.972982192 |
| ILMN_3061070 | NM_020520.2    | SLC25A20       | -0.973838789 |
| ILMN_2591627 | NM_145627.1    | RBM10          | -0.976627407 |
| ILMN_1219200 | NM_133200.3    | P2RY14         | -0.976917804 |
| ILMN_1215125 | NM_001081070.1 | PDIA2          | -0.978238494 |
| ILMN_1255898 | NM_026746.2    | NSMCE2         | -0.978973485 |
| ILMN_2733380 | NM_153680.2    | SNX17          | -0.979148493 |
| ILMN_1252838 |                | MDM4           | -0.979749168 |
| ILMN_1233545 | NM_029999.3    | LBH            | -0.980091475 |
| ILMN_2537961 | XM_358862.1    | LOC385659      | -0.980564083 |
| ILMN_2571616 |                | C430002D13RIK  | -0.981155179 |
| ILMN_2426818 | AK046853.1     | SCL0003723.1_3 | -0.9813605   |
| ILMN_1225931 | NM_172300.2    | D11MOH35       | -0.981558794 |
| ILMN_1237151 | NM_172291.1    | FOXRED1        | -0.981987523 |
| ILMN_1220586 | NM_133905.2    | PAPD4          | -0.982493131 |
| ILMN_1242202 |                | 9430090I01RIK  | -0.982974265 |
| ILMN_2952779 | NM_024170.1    | CXX1A          | -0.983482476 |
| ILMN_2813286 | NM_029705.1    | ATXN3          | -0.984154644 |
| ILMN_1226111 | XM_001481017.1 | LOC100043821   | -0.984602522 |
| ILMN_3160750 | NM_001004174.1 | AA467197       | -0.984993939 |
| ILMN_1236693 |                | BFAR           | -0.985605302 |
| ILMN_2742778 | NM_028032.1    | PPP2R2A        | -0.985849128 |
| ILMN_1252294 | NM_007907.1    | EEF2           | -0.986529325 |
| ILMN_2531515 | XM_355131.1    | LOC381200      | -0.986565546 |
| ILMN_2445477 | NM_011710.2    | WARS           | -0.987065663 |
| ILMN_2829457 | NM_010876.2    | NCF1           | -0.988409524 |

|              |                |                |              |
|--------------|----------------|----------------|--------------|
| ILMN_3064941 | NM_001077363.1 | PTBP1          | -0.988516316 |
| ILMN_2500370 |                | 9430080K19RIK  | -0.988847538 |
| ILMN_1228007 | XM_001481328.1 | DDX10          | -0.988900255 |
| ILMN_2506499 | NM_001033962.1 | UBE3A          | -0.989102254 |
| ILMN_2435584 | AK050665.1     | SCL0001978.1_6 | -0.989484734 |
| ILMN_1242427 |                | 6720458D17RIK  | -0.992411029 |
| ILMN_1222149 |                | C130021K03RIK  | -0.992755159 |
| ILMN_2685309 | NM_181854.1    | ZFP828         | -0.993758093 |
| ILMN_2635105 | NM_138314.2    | NME7           | -0.993882125 |
| ILMN_2713039 | NM_026213.3    | TTC33          | -0.994056481 |
| ILMN_1238908 | XM_358241.1    | LOC385461      | -0.994413691 |
| ILMN_2640346 | NM_028808.2    | P2RY13         | -0.995571739 |
| ILMN_1242700 | NM_029701.1    | SPCS3          | -0.996065002 |
| ILMN_2483786 |                | 1110004P21RIK  | -0.996174995 |
| ILMN_2633697 | NM_145468.1    | SKP2           | -0.996921681 |
| ILMN_3162658 | NM_029736.1    | SLC10A7        | -0.997054374 |
| ILMN_2851040 | NM_008563.2    | MCM3           | -0.997511531 |
| ILMN_3118071 | NM_001042502.1 | PITX2          | -0.997975785 |
| ILMN_2590482 | NM_029977.1    | POLQ           | -0.99829647  |
| ILMN_1258550 |                | RAD51AP1       | -0.998616908 |
| ILMN_2678828 | NM_181582.3    | EIF5A          | -0.999087991 |
| ILMN_2763871 | NM_019973.2    | SON            | -0.999478234 |
| ILMN_2726261 | NM_080288.1    | ELMO1          | -1.000289907 |
| ILMN_2661367 | NM_021395.2    | HYOU1          | -1.000838888 |
| ILMN_2625993 | NM_010913.1    | NFYA           | -1.001183464 |
| ILMN_1215781 | NM_080288.1    | ELMO1          | -1.001962114 |
| ILMN_2988199 | NM_001033435.1 | GM885          | -1.002072721 |
| ILMN_2764727 | NM_033268.2    | ACTN2          | -1.002261661 |
| ILMN_2768026 | NM_010368.1    | GUSB           | -1.003541245 |
| ILMN_2701035 | NM_026453.3    | MAK16          | -1.006434282 |
| ILMN_2629748 | NM_007842.1    | DHX9           | -1.00934407  |
| ILMN_3096701 | NM_001039129.1 | HNRPA1         | -1.009531294 |
| ILMN_2529252 | XM_355458.1    | LOC381501      | -1.009662491 |
| ILMN_2417540 | NM_153538.2    | ZCCHC6         | -1.010579122 |
| ILMN_1238654 | NM_027352.3    | GORASP2        | -1.011594484 |
| ILMN_2672997 | NM_145510.1    | RABIF          | -1.013954182 |
| ILMN_2694092 | NM_145145.1    | POMT1          | -1.015534776 |
| ILMN_2709681 | NM_133808.4    | HDLBP          | -1.01559186  |
| ILMN_1251296 | NM_023502.1    | ELF2           | -1.016466372 |
| ILMN_1252689 | NM_023220.1    | 2010106G01RIK  | -1.016991583 |
| ILMN_1259754 | NM_011278.3    | RNF4           | -1.018874733 |
| ILMN_1246038 | NM_144791.1    | TOR1AIP1       | -1.022039762 |
| ILMN_2893564 | NM_001033144.1 | 1190007F08RIK  | -1.022535076 |
| ILMN_3127411 | NM_001081195.1 | ARID4A         | -1.022854413 |
| ILMN_1250000 | NM_019769.2    | 1500003O03RIK  | -1.022989078 |
| ILMN_2593148 | NM_009201.2    | SLC1A5         | -1.023776935 |

|              |                |               |              |
|--------------|----------------|---------------|--------------|
| ILMN_1240247 | NM_027184.1    | IPMK          | -1.023939538 |
| ILMN_2635491 | NM_133905.1    | PAPD4         | -1.025079892 |
| ILMN_1219467 |                | 4833441B18RIK | -1.025680101 |
| ILMN_3055904 | NM_001076789.1 | CBX5          | -1.025787015 |
| ILMN_2683586 | NM_009794.2    | CAPN2         | -1.026872085 |
| ILMN_2982143 | NM_001033222.1 | PDZD8         | -1.028517552 |
| ILMN_3062267 | NM_012006.2    | ACOT1         | -1.028796035 |
| ILMN_2852034 | NM_010431.1    | HIF1A         | -1.028889005 |
| ILMN_2942314 | NM_027341.1    | 2310047C04RIK | -1.029257899 |
| ILMN_1230878 | NM_010395.5    | H2-T10        | -1.029574054 |
| ILMN_1237466 | XM_001003781.1 | LOC677008     | -1.029648857 |
| ILMN_2606072 | NM_010472.2    | AGFG1         | -1.029685448 |
| ILMN_1215632 | NM_010807.3    | MARCKSL1      | -1.02982222  |
| ILMN_2790181 | NM_016966.3    | PHGDH         | -1.030355108 |
| ILMN_3022895 | NM_026120.4    | 2410127L17RIK | -1.030387159 |
| ILMN_1259133 |                | 9430088P09RIK | -1.030655899 |
| ILMN_1243183 |                | 2510003D18RIK | -1.031046568 |
| ILMN_3064134 | NM_177588.2    | THNSL1        | -1.031824896 |
| ILMN_1255317 |                | ARNT          | -1.03199184  |
| ILMN_2708895 |                | STK3          | -1.032338295 |
| ILMN_2628188 | NM_026218.2    | FGFR1OP2      | -1.034193991 |
| ILMN_2695528 | NM_134020.1    | TMED4         | -1.034323128 |
| ILMN_1216972 | NM_019948.2    | CLEC4E        | -1.035231079 |
| ILMN_2692989 | NM_182994.1    | 2810410P22RIK | -1.03664939  |
| ILMN_3127739 | NM_153053.3    | SF3B4         | -1.037925064 |
| ILMN_1234997 |                | CRRY          | -1.04004686  |
| ILMN_1233380 | XM_358815.1    | LOC385634     | -1.040254504 |
| ILMN_2457854 |                | B230308N11RIK | -1.040278692 |
| ILMN_1256671 | NM_021510.2    | HNRNPH1       | -1.04047013  |
| ILMN_1254935 | NM_178684.5    | MAPK1IP1L     | -1.04098519  |
| ILMN_1257393 |                | PER3          | -1.042814471 |
| ILMN_1226240 | NM_016902.3    | NPHP1         | -1.042930328 |
| ILMN_2958410 | NM_019635.2    | STK3          | -1.045400603 |
| ILMN_2770528 |                | MTHFD1        | -1.046607374 |
| ILMN_2525799 | NM_207000.2    | H2AFY2        | -1.046742013 |
| ILMN_1237993 | NM_016777.3    | NASP          | -1.047545813 |
| ILMN_2767113 | NM_009372.2    | TGIF1         | -1.047609948 |
| ILMN_2711112 | NM_011369.2    | SHCBP1        | -1.048167884 |
| ILMN_2958912 | NM_001079824.1 | HNRNPH3       | -1.049132265 |
| ILMN_2663114 | NM_145468.1    | SKP2          | -1.049422198 |
| ILMN_2687744 | NM_027445.1    | RNF167        | -1.050169393 |
| ILMN_2589181 | NM_007907.1    | EEF2          | -1.050269137 |
| ILMN_2610771 | NM_001047159.1 | NET1          | -1.050667191 |
| ILMN_2464573 | NM_178589.3    | TNFRSF21      | -1.051801337 |
| ILMN_1232189 | XM_284494.5    | DDX10         | -1.05221477  |
| ILMN_2846865 | NM_007393.1    | ACTB          | -1.053067787 |



|              |                |                 |              |
|--------------|----------------|-----------------|--------------|
| ILMN_2531259 | XR_033415.1    | LOC626309       | -1.053937671 |
| ILMN_1228804 |                | A430106G13RIK   | -1.054290769 |
| ILMN_1220261 | NM_146010.1    | TSPAN8          | -1.054685438 |
| ILMN_2421064 |                | GTF3C4          | -1.054751538 |
| ILMN_1249522 | NM_013853.1    | ABCF2           | -1.055040377 |
| ILMN_3059476 | NM_001013370.1 | SESN1           | -1.056661128 |
| ILMN_1260233 | NM_183390.1    | KLHL6           | -1.058087557 |
| ILMN_2803920 | NM_010742.1    | LY6D            | -1.059182869 |
| ILMN_1238463 | NM_181815.2    | 4930534B04RIK   | -1.059411217 |
| ILMN_1225818 |                | TIA1            | -1.05978738  |
| ILMN_1246346 |                | B230107H12RIK   | -1.060854557 |
| ILMN_2699665 | XM_284386.5    | CD209F          | -1.063973892 |
| ILMN_2753314 | XM_283757.2    | GTL7            | -1.064752721 |
| ILMN_2729953 | NM_011151.1    | PPM1B           | -1.066744727 |
| ILMN_1221943 | NM_022324.2    | SDF2L1          | -1.067446197 |
| ILMN_1249688 | NM_027206.2    | TNFAIP8L2       | -1.068128924 |
| ILMN_2707399 | NM_010561.1    | ILF3            | -1.068247395 |
| ILMN_2720229 | NM_010721.1    | LMNB1           | -1.068553321 |
| ILMN_2966162 | NM_178936.3    | TMEM56          | -1.068937213 |
| ILMN_1228139 | NM_011937.1    | GNPDA1          | -1.072046839 |
| ILMN_2527000 | XM_124040.3    | LOC229274       | -1.072735843 |
| ILMN_2670690 | NM_010389.3    | H2-OB           | -1.073952072 |
| ILMN_2710731 | NM_007998.5    | FECH            | -1.074567745 |
| ILMN_2844097 | NM_183186.2    | FOXN3           | -1.074811134 |
| ILMN_2704826 |                | ACAA2           | -1.076137454 |
| ILMN_1234319 | NM_010761.2    | CCNDBP1         | -1.076876529 |
| ILMN_1231392 | NM_010790.2    | MELK            | -1.077507786 |
| ILMN_2703585 | NM_008095.3    | GBAS            | -1.078651137 |
| ILMN_2629982 | NM_001039202.1 | HDHD2           | -1.078736322 |
| ILMN_2742626 | NM_011462.1    | SPIN            | -1.080119041 |
| ILMN_2772274 | NM_001079694.1 | SFRS5           | -1.080284233 |
| ILMN_2444316 | NM_022314.2    | TPM3            | -1.081013213 |
| ILMN_2590638 | NM_009754.2    | BCL2L11         | -1.081454921 |
| ILMN_2663555 | NM_023906.3    | ASB3            | -1.081668061 |
| ILMN_1215280 | XM_128487.2    | LOC224732       | -1.081724426 |
| ILMN_2648230 |                | KARS            | -1.082826083 |
| ILMN_2441850 | AK050226.1     | SCL0002337.1_39 | -1.084162517 |
| ILMN_2544603 |                | 2610015J01RIK   | -1.084506494 |
| ILMN_2690077 | NM_023317.1    | NDE1            | -1.084911902 |
| ILMN_2704823 | NM_177470.3    | ACAA2           | -1.085268077 |
| ILMN_1251631 |                | EIF5A           | -1.085714975 |
| ILMN_2991799 | NM_007753.1    | CPA3            | -1.086222249 |
| ILMN_2591626 | NM_145627.1    | RBM10           | -1.086534325 |
| ILMN_1224433 | NM_138594.3    | D6WSU163E       | -1.086616385 |
| ILMN_1234698 | NM_027533.2    | TSPAN2          | -1.087097483 |
| ILMN_2969172 | NM_173734.2    | TMEM87A         | -1.08815194  |

|              |                |               |              |
|--------------|----------------|---------------|--------------|
| ILMN_1226520 | NM_009640.3    | ANGPT1        | -1.090884676 |
| ILMN_2732476 | NM_030564.1    | RNF34         | -1.092627005 |
| ILMN_2580847 |                | 1810062O14RIK | -1.092686595 |
| ILMN_1219262 | NM_144873.2    | UHRF2         | -1.093069025 |
| ILMN_2521065 | NM_009408.2    | TOP1          | -1.094010776 |
| ILMN_2670959 | NM_009224.4    | SNRP70        | -1.094558375 |
| ILMN_1253779 | NM_030715.3    | POLH          | -1.096620566 |
| ILMN_2612096 | NM_172735.2    | ZC3HC1        | -1.098110711 |
| ILMN_2962565 | NM_001033539.2 | BEX6          | -1.098549473 |
| ILMN_1235399 | NM_008572.1    | MCPT8         | -1.099608259 |
| ILMN_1246060 | NM_172871.2    | KLHL9         | -1.100012118 |
| ILMN_2829171 | NM_133834.1    | HNRNPF        | -1.100035105 |
| ILMN_2930203 | NM_201641.1    | UGT1A10       | -1.100235203 |
| ILMN_2451718 | NM_027976.2    | ACSL5         | -1.10040506  |
| ILMN_2688923 | NM_021510.2    | HNRNPH1       | -1.101386557 |
| ILMN_1243291 | NM_008974.2    | PTP4A2        | -1.10146146  |
| ILMN_2755434 | NM_026507.2    | 2310031L18RIK | -1.101659899 |
| ILMN_2678466 | NM_009443.3    | TGOLN1        | -1.103292444 |
| ILMN_2695526 | NM_134020.1    | TMED4         | -1.103314035 |
| ILMN_2711754 | NM_172291.1    | FOXRED1       | -1.103703267 |
| ILMN_2742675 | NM_009071.2    | ROCK1         | -1.10429127  |
| ILMN_1218148 | XM_914676.2    | BDP1          | -1.105406412 |
| ILMN_2531281 | XM_195069.2    | LOC271490     | -1.106150989 |
| ILMN_1251876 |                | SRPK2         | -1.108187568 |
| ILMN_2713686 | NM_134021.2    | PNPO          | -1.10831908  |
| ILMN_2694758 | NM_133766.3    | EFR3A         | -1.108884154 |
| ILMN_2609590 | NM_007753.1    | CPA3          | -1.109393666 |
| ILMN_1244851 | NM_027604.3    | USP15         | -1.109666482 |
| ILMN_2721149 | NM_177337.3    | ARL11         | -1.113088193 |
| ILMN_1217577 | NM_172592.2    | SFRS12        | -1.113469775 |
| ILMN_2704822 |                | ACAA2         | -1.11361944  |
| ILMN_1245389 | NR_003517.1    | LOC236604     | -1.115147704 |
| ILMN_1239773 |                | ECT2          | -1.115171357 |
| ILMN_1223539 | NM_001001491.1 | TPM4          | -1.115947025 |
| ILMN_1258813 | NM_175193.5    | GOLIM4        | -1.116084799 |
| ILMN_1221102 | NM_182994.2    | ARL5A         | -1.117204233 |
| ILMN_3163340 | NM_153405.2    | RBM45         | -1.117809412 |
| ILMN_1220726 | NM_009122.1    | SATB1         | -1.120481642 |
| ILMN_2647282 | NM_008974.3    | PTP4A2        | -1.122994776 |
| ILMN_2758969 | NM_007841.3    | DDX6          | -1.123716829 |
| ILMN_3031781 | NM_023598.2    | ARID5B        | -1.12477062  |
| ILMN_1244891 | NM_009977.2    | CST7          | -1.12691029  |
| ILMN_1215465 | NM_177326.2    | PAK2          | -1.127420121 |
| ILMN_1246473 | NM_001081636.1 | CCND3         | -1.127720033 |
| ILMN_1220416 | NM_026654.2    | TOE1          | -1.128316763 |
| ILMN_1236599 | XR_032463.1    | LOC546090     | -1.129112925 |

|              |                |               |              |
|--------------|----------------|---------------|--------------|
| ILMN_1253985 |                | A330021D07RIK | -1.129382909 |
| ILMN_2664491 |                | SNX2          | -1.130976626 |
| ILMN_2450590 | NM_053170.2    | TRIM33        | -1.131047142 |
| ILMN_3073406 | NM_134038.2    | SLC16A6       | -1.131315946 |
| ILMN_2582964 |                | E030040J22RIK | -1.131712037 |
| ILMN_1215209 | NM_019948.1    | CLECSF9       | -1.132354007 |
| ILMN_2719888 | NM_013716.2    | G3BP1         | -1.132636596 |
| ILMN_1226819 | NM_009318.1    | TAPBP         | -1.133573258 |
| ILMN_2629657 | NM_139117.2    | CSDA          | -1.135186272 |
| ILMN_2466692 |                | TEX10         | -1.135398226 |
| ILMN_1247533 |                | A230013K13RIK | -1.135406005 |
| ILMN_1243704 | NM_008016.1    | FIN15         | -1.135692737 |
| ILMN_2715319 | NM_008548.4    | MAN1A         | -1.137464753 |
| ILMN_2663230 | NM_023908.2    | SLCO3A1       | -1.138848443 |
| ILMN_2464253 | NM_007395.3    | ACVR1B        | -1.141261468 |
| ILMN_1245987 | NM_025279.2    | HNRNPK        | -1.141341382 |
| ILMN_2691815 | NM_011816.3    | G3BP2         | -1.141936959 |
| ILMN_1258846 | NM_178610.3    | KRR1          | -1.142656152 |
| ILMN_1214110 | NM_021419.1    | RNF8          | -1.143024879 |
| ILMN_1223954 | NM_019418.2    | TNFSF14       | -1.143063761 |
| ILMN_1231810 | NM_009455.3    | UBE2E1        | -1.143085364 |
| ILMN_2738865 | NM_009186.4    | SFRS10        | -1.143323904 |
| ILMN_2711688 | NM_007421.1    | ADSSL1        | -1.143974643 |
| ILMN_1224932 |                | E430003D02RIK | -1.145837567 |
| ILMN_2717176 | NM_016846.3    | RGL1          | -1.14607839  |
| ILMN_2529896 | XM_283332.1    | LOC328660     | -1.147273883 |
| ILMN_1252545 | NM_008635.1    | MTAP7         | -1.14769166  |
| ILMN_1242378 | XM_975051.2    | AI848100      | -1.150639801 |
| ILMN_2669280 | NM_145537.1    | EDEM2         | -1.152940863 |
| ILMN_3116935 | NM_177584.3    | BTLA          | -1.154207676 |
| ILMN_2636339 | NM_008394.2    | IRF9          | -1.154846726 |
| ILMN_2706514 | XM_001476583.1 | LOC100046608  | -1.155187926 |
| ILMN_1226766 |                | B430320J11RIK | -1.155327797 |
| ILMN_2529432 | XM_194577.3    | LOC270491     | -1.155931728 |
| ILMN_2667144 | NM_172456.2    | ENDOGL1       | -1.156877526 |
| ILMN_1240428 |                | SATB1         | -1.157645036 |
| ILMN_2680648 | NM_027435.2    | ATAD2         | -1.15802928  |
| ILMN_2965660 | NM_133237.2    | APCDD1        | -1.159972084 |
| ILMN_1220795 |                | 6430514E13RIK | -1.161716438 |
| ILMN_2724303 | NM_029766.2    | DTL           | -1.163257144 |
| ILMN_2813284 | NM_029705.1    | ATXN3         | -1.163389658 |
| ILMN_1214659 | XM_001472244.1 | EG633692      | -1.163850356 |
| ILMN_1225861 | NM_026876.2    | 1190005F20RIK | -1.164067305 |
| ILMN_2753444 | NM_011505.1    | STXBP4        | -1.1646994   |
| ILMN_2710449 | NM_024223.1    | CRIP2         | -1.16476293  |
| ILMN_1216204 | NM_016776.2    | MYBBP1A       | -1.165768324 |

|              |                |                 |              |
|--------------|----------------|-----------------|--------------|
| ILMN_1221467 | NM_145964.2    | BC002199        | -1.168253724 |
| ILMN_1243996 | NM_138679.5    | ASH1L           | -1.168996604 |
| ILMN_1232186 | NM_011677.2    | UNG             | -1.169369712 |
| ILMN_2533689 | XM_121997.2    | LOC215879       | -1.170018632 |
| ILMN_1216898 |                | KIT             | -1.170421512 |
| ILMN_2670507 | NM_011237.2    | RAD9            | -1.171024758 |
| ILMN_2776585 | NM_009201.2    | SLC1A5          | -1.171419748 |
| ILMN_2921163 | NM_001081267.1 | RSF1            | -1.172135051 |
| ILMN_1236637 | NM_053170.2    | TRIM33          | -1.173220267 |
| ILMN_2672798 | NM_080554.2    | PSMD5           | -1.17329507  |
| ILMN_2515273 | NM_011978.2    | SLC27A2         | -1.173382299 |
| ILMN_1254231 | NM_011675.1    | UCK1            | -1.173588644 |
| ILMN_2456769 | AK021284.1     | SCL0004085.1_27 | -1.173666698 |
| ILMN_1215722 | NM_028031.1    | ZDHHC13         | -1.181930019 |
| ILMN_2655395 | NM_153116.1    | GTPBP10         | -1.182440639 |
| ILMN_2727967 | NM_026665.2    | CEP57           | -1.183145137 |
| ILMN_2863060 | NM_001033259.1 | CCDC109A        | -1.188309151 |
| ILMN_3011214 | NM_011600.2    | TLE4            | -1.189318126 |
| ILMN_2629165 | NM_025888.2    | 2410004N11RIK   | -1.191294622 |
| ILMN_1221266 | NM_198683.1    | CUGBP1          | -1.192019349 |
| ILMN_1255419 |                | ZFPN1A1         | -1.192819458 |
| ILMN_1225535 | NM_008060.1    | GANAB           | -1.192978476 |
| ILMN_1232851 | NM_024448.2    | RAB12           | -1.194494414 |
| ILMN_2645390 | NM_177326.2    | PAK2            | -1.197000785 |
| ILMN_2602115 | NM_145605.1    | KLHDC4          | -1.197575962 |
| ILMN_2719131 | NM_026476.1    | 2610101N10RIK   | -1.198866271 |
| ILMN_1222249 | XM_914270.2    | CNOT1           | -1.199738412 |
| ILMN_3018758 | NM_019584.2    | BECN1           | -1.200259432 |
| ILMN_1256122 |                | HDC             | -1.200409573 |
| ILMN_2657575 | NM_007941.1    | STX2            | -1.203828673 |
| ILMN_1259989 | NM_001033988.1 | NCOA4           | -1.204814351 |
| ILMN_2788073 | NM_010442.1    | HMOX1           | -1.206995215 |
| ILMN_1214944 | XM_131754.7    | AIM1L           | -1.209843295 |
| ILMN_1236994 | NM_018888.1    | 2410003P15RIK   | -1.210070287 |
| ILMN_2752524 | NM_198414.2    | PAQR9           | -1.210264477 |
| ILMN_2533766 | NM_001033259.2 | CCDC109A        | -1.212037756 |
| ILMN_1230605 | XM_001474633.1 | GM336           | -1.212099134 |
| ILMN_2776230 | NM_019929.1    | SUMO3           | -1.212200919 |
| ILMN_1216900 | NM_001042499.1 | RABL3           | -1.212542863 |
| ILMN_2495475 | NM_020505.2    | VAV3            | -1.215573476 |
| ILMN_2615170 | NM_025862.2    | ACAD8           | -1.218725307 |
| ILMN_2682887 | NM_001080999.1 | TRMT2A          | -1.218962475 |
| ILMN_3011376 | NM_018729.2    | CD244           | -1.22028797  |
| ILMN_2886981 | NM_145375.1    | TM6SF1          | -1.221043008 |
| ILMN_1212633 | XM_124565.3    | LOC231444       | -1.222155881 |
| ILMN_2509988 |                | LBR             | -1.223319176 |

|              |                |                 |                    |
|--------------|----------------|-----------------|--------------------|
| ILMN_2519122 |                | SCL0004166.1_8  | -1.223781539       |
| ILMN_1248403 | BC044301.1     | SCL0001550.1_29 | -1.224550626       |
| ILMN_2852380 | NM_011899.3    | SRP54           | -1.225616209       |
| ILMN_1220688 | NM_001033301.2 | 6330505N24RIK   | -1.225879244       |
| ILMN_1235200 |                | 4932411N02RIK   | -1.226711905       |
| ILMN_1213596 | NM_008534.1    | LY9             | -1.227059913       |
| ILMN_1237406 | NM_001029872.1 | ITGAD           | -1.228790631       |
| ILMN_2725286 | NM_027439.3    | ATP6AP2         | -1.229089428       |
| ILMN_2745741 | NM_172606.2    |                 | March6 -1.22983274 |
| ILMN_2977558 | NM_010019.2    | DAPK2           | -1.230476822       |
| ILMN_2689473 | NM_007381.3    | ACADL           | -1.230774667       |
| ILMN_2627318 | XM_148429.1    | 4930455C21RIK   | -1.230900937       |
| ILMN_2759335 | NM_026440.3    | RNMT            | -1.23176409        |
| ILMN_1259419 | XM_914270.2    | CNOT1           | -1.23328257        |
| ILMN_1218504 | NM_172264.1    | CHDH            | -1.236507469       |
| ILMN_2549697 |                | 4930447F20RIK   | -1.236727951       |
| ILMN_1228561 | NM_001042558.1 | APAF1           | -1.237798474       |
| ILMN_2615741 |                | EIF3S8          | -1.238375794       |
| ILMN_2524992 | NM_007895.2    | EAR2            | -1.239972241       |
| ILMN_1252046 | NM_013910.2    | FBXL10          | -1.240157733       |
| ILMN_1245942 | NM_001037725.2 | ALS2CR13        | -1.242318118       |
| ILMN_1221503 | NM_007631.1    | CCND1           | -1.245394666       |
| ILMN_2685696 | NM_023626.4    | ING3            | -1.245516608       |
| ILMN_2533526 | XM_134223.2    | LOC234360       | -1.247953334       |
| ILMN_2687628 | XM_134100.3    | CKAP2           | -1.249763025       |
| ILMN_2551668 |                | CLA3            | -1.253558033       |
| ILMN_1248340 | NM_178069.5    | LSG1            | -1.253691218       |
| ILMN_2597868 | NM_011175.2    | LGMN            | -1.254710738       |
| ILMN_1214515 | NM_019729.2    | USP8            | -1.2572164         |
| ILMN_2752010 | NM_008565.2    | MCM4            | -1.259041439       |
| ILMN_2688631 |                | CRRY            | -1.26012762        |
| ILMN_2826671 | NM_010141.2    | EPHA7           | -1.260413888       |
| ILMN_1235327 |                | RBBP4           | -1.260963949       |
| ILMN_3157232 | NM_001003916.1 | ZC4H2           | -1.264062709       |
| ILMN_2658219 | NM_010749.4    | M6PR            | -1.264300072       |
| ILMN_2751548 | NM_183408.2    | PDE4A           | -1.26521497        |
| ILMN_2815479 | NM_172787.1    | L3MBTL3         | -1.268102247       |
| ILMN_1252133 | XR_001705.1    | LOC269859       | -1.268360798       |
| ILMN_1240537 | NM_028755.2    | ARPP21          | -1.269594197       |
| ILMN_2455406 | NM_001004436.3 | WAPAL           | -1.270063681       |
| ILMN_1249366 | XM_001476583.1 | LOC100046608    | -1.272807307       |
| ILMN_2597778 | NM_008137.3    | GNA14           | -1.274989809       |
| ILMN_2741114 | NM_010368.1    | GUSB            | -1.278135456       |
| ILMN_2435505 | NM_009480.2    | USF1            | -1.283213935       |
| ILMN_1219572 | NM_001024622.2 | PCNP            | -1.283630346       |
| ILMN_1248368 | NM_145569.4    | MAT2A           | -1.283962748       |

|              |                |                  |              |
|--------------|----------------|------------------|--------------|
| ILMN_1254113 |                | SNX2             | -1.28476287  |
| ILMN_2499356 | NM_011917.2    | XRN2             | -1.285068679 |
| ILMN_2524699 | XM_135109.4    | 9430077D24RIK    | -1.286733882 |
| ILMN_2662545 | NM_145145.1    | POMT1            | -1.287597567 |
| ILMN_3102643 | NM_011561.1    | TDG              | -1.291100645 |
| ILMN_1246496 | NM_178684.5    | MAPK1IP1L        | -1.292584124 |
| ILMN_1216777 |                | 2310008I22RIK    | -1.295589536 |
| ILMN_2601471 | NM_007631.1    | CCND1            | -1.296353372 |
| ILMN_1215521 | NM_011943.1    | MAP2K6           | -1.29831469  |
| ILMN_2483422 | XM_001474715.1 | LOC100040462     | -1.298341235 |
| ILMN_2526382 | XM_355225.1    | LOC381285        | -1.299290315 |
| ILMN_1213708 |                | 4732462B05RIK    | -1.303126221 |
| ILMN_1251375 | XM_925022.2    | GM1752           | -1.303227611 |
| ILMN_2622255 | XM_204072.3    | EPHB2            | -1.303325552 |
| ILMN_3157764 | NM_001042484.1 | GOLGA7           | -1.303417377 |
| ILMN_2526174 | XM_354669.1    | LOC380756        | -1.304115998 |
| ILMN_2460102 | AK036186.1     | SCL0001602.1_506 | -1.304129555 |
| ILMN_1241523 |                | PTPRS            | -1.304661031 |
| ILMN_2935979 | NM_001081122.1 | CEP63            | -1.305081465 |
| ILMN_1243283 | XR_032844.1    | LOC100046320     | -1.305129185 |
| ILMN_2695008 |                | NCOA4            | -1.305999753 |
| ILMN_1234171 | NM_007971.1    | EZH2             | -1.307508325 |
| ILMN_2774140 | NM_013686.3    | TCP1             | -1.307702191 |
| ILMN_2482766 | NM_009433.2    | TSPYL1           | -1.308127959 |
| ILMN_2618549 | NM_009005.1    | RAB7             | -1.308242378 |
| ILMN_2479666 | NM_011675.1    | UCK1             | -1.308752281 |
| ILMN_2732034 | XM_284541.1    | LRRFIP2          | -1.311867412 |
| ILMN_2744660 | XM_354710.1    | IGH-6            | -1.312041016 |
| ILMN_2722469 | NM_026101.2    | HERC4            | -1.312666156 |
| ILMN_1225921 | NM_201642.4    | UGT1A7C          | -1.315593363 |
| ILMN_2868480 | NM_001017422.1 | EAR4             | -1.317232399 |
| ILMN_2681601 | NM_152808.2    | SLC44A2          | -1.31752006  |
| ILMN_3149251 | NM_008133.3    | LGSN             | -1.317927262 |
| ILMN_2690214 | NM_183264.3    | 5830405N20RIK    | -1.319809406 |
| ILMN_2525278 | XM_110248.4    | FBXO11           | -1.320385139 |
| ILMN_1249092 |                | KIF23            | -1.320601957 |
| ILMN_2744657 | XM_354710.1    | IGH-6            | -1.323333634 |
| ILMN_2719256 | NM_010824.1    | MPO              | -1.323359652 |
| ILMN_2741621 | NM_007465.1    | BIRC2            | -1.324903435 |
| ILMN_2498173 | NM_009479.2    | UROS             | -1.325245132 |
| ILMN_1232396 | NM_007895.2    | EAR2             | -1.325348387 |
| ILMN_2583684 | NM_001001735.1 | WHSC1L1          | -1.327907036 |
| ILMN_1232251 | NM_009408.2    | TOP1             | -1.328510251 |
| ILMN_1222715 | XM_358974.1    | LOC385855        | -1.328639307 |
| ILMN_2609025 | NM_080288.1    | ELMO1            | -1.329701489 |
| ILMN_1243184 | NM_001081350.1 | NOL8             | -1.330657991 |

|              |                |                 |              |
|--------------|----------------|-----------------|--------------|
| ILMN_2692986 | NM_182994.1    | 2810410P22RIK   | -1.334239447 |
| ILMN_1246268 | AK075947.1     | SCL0001487.1_50 | -1.334480348 |
| ILMN_1233746 | NM_133916.2    | EIF3B           | -1.334619882 |
| ILMN_2688507 | XM_357629.1    | LOC384411       | -1.33517536  |
| ILMN_1259320 | NM_001081308.1 | TAOK3           | -1.335740995 |
| ILMN_2417926 | XM_977361.1    | LOC665506       | -1.338000246 |
| ILMN_2648397 | NM_021505.2    | ANAPC5          | -1.338546717 |
| ILMN_2664797 | NM_008676.1    | NBR1            | -1.341525764 |
| ILMN_2671644 | NM_022309.3    | CBFB            | -1.342689862 |
| ILMN_1231769 |                | MYB             | -1.344481936 |
| ILMN_1230923 | NM_013703.1    | VLDLR           | -1.345863283 |
| ILMN_2515601 | NM_013703.1    | VLDLR           | -1.347051711 |
| ILMN_2431619 |                | UBE2L6          | -1.347135047 |
| ILMN_2753979 | NM_001039103.2 | RASA4           | -1.348167153 |
| ILMN_1223571 | NM_008964.3    | PTGER2          | -1.349258177 |
| ILMN_2426140 | NM_001081203.1 | SBNO1           | -1.35211529  |
| ILMN_2480814 | NM_021349.1    | TNFRSF13B       | -1.354395058 |
| ILMN_2525491 | XM_284573.2    | LOC331102       | -1.356677775 |
| ILMN_1246006 | XM_136041.3    | AI448196        | -1.360988598 |
| ILMN_2669793 | NM_007631.2    | CCND1           | -1.365031708 |
| ILMN_1231877 |                | 4930431J19RIK   | -1.366612149 |
| ILMN_1247147 | NM_007678.3    | CEBPA           | -1.36728352  |
| ILMN_2698485 | NM_027541.2    | PRPF3           | -1.368687628 |
| ILMN_2698767 | NM_023223.1    | CDC20           | -1.370488234 |
| ILMN_2582171 |                | A630098G22RIK   | -1.370554973 |
| ILMN_1249368 | NM_001081195.1 | ARID4A          | -1.372121688 |
| ILMN_2796472 | NM_013703.1    | VLDLR           | -1.374626043 |
| ILMN_2709478 | NM_021389.4    | SH3KBP1         | -1.375638778 |
| ILMN_2632076 | NM_018737.2    | CTPS2           | -1.375910893 |
| ILMN_2505307 | NM_013771.4    | YME1L1          | -1.376726743 |
| ILMN_2493544 |                | A530017D24RIK   | -1.377227061 |
| ILMN_2638487 | NM_010164.2    | EYA1            | -1.378120579 |
| ILMN_2420200 | NM_019729.2    | USP8            | -1.381361755 |
| ILMN_2854054 | NM_001080944.1 | ATP8B4          | -1.383148093 |
| ILMN_1258474 | NM_177389.3    | MIA3            | -1.385256786 |
| ILMN_2750548 |                | GNPDA1          | -1.388292427 |
| ILMN_2629120 | NM_011931.3    | RFWD2           | -1.388706829 |
| ILMN_1230786 |                | 5730588I11RIK   | -1.39024083  |
| ILMN_2535680 | XM_484225.5    | AK157302        | -1.396769263 |
| ILMN_2593368 | NM_145569.4    | MAT2A           | -1.397031792 |
| ILMN_3148398 | NM_029735.1    | EPRS            | -1.397301313 |
| ILMN_2477324 | NM_011280.1    | TRIM10          | -1.398675995 |
| ILMN_1247017 | NM_146112.3    | TNRC15          | -1.399127326 |
| ILMN_3062470 | NM_001024385.1 | CRLS1           | -1.400045999 |
| ILMN_3107377 | NM_001037941.1 | DNAJB6          | -1.404289526 |
| ILMN_2680827 | NM_008372.3    | IL7R            | -1.404345529 |

|              |                |               |              |
|--------------|----------------|---------------|--------------|
| ILMN_1216718 | NM_011462.2    | SPIN1         | -1.407168491 |
| ILMN_2558167 |                | 9330158N06RIK | -1.409037303 |
| ILMN_1239430 | NM_008625.1    | MRC1          | -1.411784557 |
| ILMN_3034381 | NM_172394.2    | NUP88         | -1.411792518 |
| ILMN_2706462 | NM_008351.1    | IL12A         | -1.413654985 |
| ILMN_1227209 | NM_026873.2    | PTCD2         | -1.415635414 |
| ILMN_2931918 | NM_030069.1    | 4432416J03RIK | -1.416760691 |
| ILMN_2860244 | NM_029436.3    | KLHL24        | -1.420456202 |
| ILMN_3075340 | NM_133200.3    | P2RY14        | -1.420814174 |
| ILMN_2665087 | NM_010635.1    | KLF1          | -1.421320214 |
| ILMN_2776231 | NM_019929.3    | SUMO3         | -1.423189454 |
| ILMN_2679502 | NM_001081251.1 | PBRM1         | -1.424924476 |
| ILMN_2591651 |                | A330080J22RIK | -1.425486924 |
| ILMN_2599748 | NM_011943.2    | MAP2K6        | -1.427073534 |
| ILMN_2629591 | NM_019734.1    | ASAH1         | -1.4306719   |
| ILMN_2488662 | NM_032008.3    | SLMAP         | -1.431012482 |
| ILMN_1230072 | NM_028768.2    | ARMC8         | -1.431250956 |
| ILMN_2804559 | NM_178638.2    | TMEM108       | -1.431513679 |
| ILMN_2769325 | NM_009852.1    | CD6           | -1.433953645 |
| ILMN_1228999 | NM_019685.2    | RUVBL1        | -1.434180004 |
| ILMN_3132361 | NM_001033988.1 | NCOA4         | -1.434957209 |
| ILMN_1256019 | XR_032458.1    | LOC333331     | -1.438752953 |
| ILMN_2435302 |                | 2010001H16RIK | -1.439667398 |
| ILMN_3117602 | NM_009852.3    | CD6           | -1.441514684 |
| ILMN_2509139 | NM_028173.3    | TRAM1         | -1.443509179 |
| ILMN_2649083 | NM_023671.1    | CLNS1A        | -1.444447043 |
| ILMN_1246590 | XM_912102.2    | LOC545208     | -1.444566037 |
| ILMN_1225311 | NM_010509.1    | IFNAR2        | -1.444992341 |
| ILMN_1249305 | XR_002517.1    | LOC209281     | -1.445840365 |
| ILMN_2609052 | NM_026556.3    | DYNLL2        | -1.445939519 |
| ILMN_1248381 | NM_134017.1    | MAT2B         | -1.451742561 |
| ILMN_1236125 | NM_008567.1    | MCM6          | -1.45190749  |
| ILMN_1235392 | XR_034278.1    | LOC668183     | -1.45412918  |
| ILMN_1252389 | XM_001476489.1 | LOC100046136  | -1.45451264  |
| ILMN_2696629 | NM_008400.2    | ITGAL         | -1.45593162  |
| ILMN_2650812 | NM_008112.4    | GDI2          | -1.457980819 |
| ILMN_2648100 | XM_001003154.1 | LOC676974     | -1.459095276 |
| ILMN_1218327 | NM_199035.1    | ALG8          | -1.463728184 |
| ILMN_2770260 | NM_019583.3    | IL17RB        | -1.467193796 |
| ILMN_2670662 | NM_144901.2    | CSDE1         | -1.469371057 |
| ILMN_2513895 | NM_019748.2    | SAE1          | -1.471257386 |
| ILMN_1244135 | NM_026369.1    | ARPC5         | -1.471554652 |
| ILMN_1258916 | XM_001480958.1 | ATP13A3       | -1.471865781 |
| ILMN_1212717 | NM_009372.2    | TGIF1         | -1.473258564 |
| ILMN_3068231 | NM_008558.1    | MAX           | -1.478250305 |
| ILMN_1224128 | NM_010902.3    | NFE2L2        | -1.482794565 |



|              |                |                 |              |
|--------------|----------------|-----------------|--------------|
| ILMN_1228608 | XM_001479982.1 | LOC637353       | -1.485236555 |
| ILMN_2526938 | XM_001480713.1 | LOC623121       | -1.485577392 |
| ILMN_2921526 | NM_009797.1    | CAPZA1          | -1.488717245 |
| ILMN_2543842 |                | 2810417K24RIK   | -1.492068298 |
| ILMN_2647628 | NM_172707.2    | PPP1CB          | -1.49233247  |
| ILMN_1254343 | NM_001033435.2 | GM885           | -1.495912948 |
| ILMN_2843286 | NM_172980.1    | SLC28A2         | -1.504968639 |
| ILMN_2694960 | NM_010833.2    | MSN             | -1.507805451 |
| ILMN_3133095 | NM_028060.2    | SLC35F2         | -1.508578578 |
| ILMN_2543630 |                | 4933439C20RIK   | -1.513498132 |
| ILMN_3013874 | NR_002883.1    | EG434858        | -1.513912127 |
| ILMN_1220187 | NM_013636.3    | PPP1CC          | -1.515504244 |
| ILMN_2720836 | NM_178446.2    | RBM47           | -1.516005499 |
| ILMN_1230063 | AK075923.1     | SCL0002130.1_20 | -1.517003708 |
| ILMN_2704119 | NM_146207.1    | CUL4A           | -1.51926286  |
| ILMN_2635718 | NM_027292.2    | BZRPL1          | -1.522860255 |
| ILMN_2665359 | NM_177547.3    | SGK3            | -1.529845387 |
| ILMN_1260532 | XM_359326.6    | JARID1A         | -1.531194357 |
| ILMN_1218264 | NM_013703.1    | VLDLR           | -1.531738835 |
| ILMN_2628657 | NM_027439.2    | ATP6AP2         | -1.53639406  |
| ILMN_2571934 |                | D030034I04RIK   | -1.540520607 |
| ILMN_1213167 | NM_013507.2    | EIF4G2          | -1.545631514 |
| ILMN_1256883 | NM_011234.4    | RAD51           | -1.546890443 |
| ILMN_2675223 | NM_021293.2    | CD33            | -1.549518158 |
| ILMN_2616768 | NM_029478.3    | TMEM49          | -1.550480898 |
| ILMN_3075157 | NM_172605.2    | TDRD3           | -1.551202002 |
| ILMN_2708397 | NM_198609.1    | BC003885        | -1.559115153 |
| ILMN_2705119 | XM_001477963.1 | LOC100047353    | -1.560370009 |
| ILMN_2745889 | NM_134188.2    | ACOT2           | -1.563500057 |
| ILMN_1246690 | NM_007753.1    | CPA3            | -1.564155388 |
| ILMN_3086201 | NM_001002004.1 | 2610507B11RIK   | -1.568100868 |
| ILMN_1259769 | NM_008774.2    | PABPC1          | -1.571130678 |
| ILMN_1224894 | NM_134092.2    | MTBP            | -1.587568593 |
| ILMN_2534125 | XM_354602.1    | LOC380691       | -1.588615424 |
| ILMN_2860699 | NM_013514.2    | EPB4.9          | -1.590913237 |
| ILMN_2683910 | NM_010848.3    | MYB             | -1.594686011 |
| ILMN_2526918 | NM_001005508.1 | ARHGAP30        | -1.595895205 |
| ILMN_2861176 | NM_007591.3    | CALR            | -1.607071858 |
| ILMN_2631505 | XM_357633.1    | LOC384415       | -1.609064016 |
| ILMN_1236718 | NM_008220.3    | HBB-B1          | -1.61674262  |
| ILMN_1228235 |                | CTSE            | -1.621350429 |
| ILMN_2647627 |                | PPP1CB          | -1.621841014 |
| ILMN_2685695 | NM_023626.3    | ING3            | -1.622257679 |
| ILMN_2653642 | NM_029334.1    | ZC3H14          | -1.622324924 |
| ILMN_2617920 | NM_028624.1    | 1110017D15RIK   | -1.632591789 |
| ILMN_2957614 | NM_007422.2    | ADSS            | -1.632831839 |

|              |                |                       |              |
|--------------|----------------|-----------------------|--------------|
| ILMN_1213014 | NM_009471.2    | UMPS                  | -1.63744929  |
| ILMN_3070576 | NM_008133.3    | LGSN                  | -1.637844988 |
| ILMN_2684986 | NM_021510.1    | HNRPH1                | -1.638103121 |
| ILMN_2747923 | NM_016917.2    | SLC40A1               | -1.649238962 |
| ILMN_2684987 | NM_021510.2    | HNRNPH1               | -1.649833273 |
| ILMN_2649286 | XM_991819.1    | LOC243431             | -1.652394925 |
| ILMN_1258462 | NM_010456.2    | HOXA9                 | -1.65592595  |
| ILMN_1229935 | XR_034036.1    | LOC434200             | -1.657358541 |
| ILMN_2619762 | NM_013596.1    | MC5R                  | -1.658847202 |
| ILMN_2589477 | NM_145507.1    | DARS                  | -1.661391711 |
| ILMN_1225882 | XM_289803.2    | LOC333744             | -1.662354475 |
| ILMN_2663613 | NM_010580.1    | ITGB5                 | -1.663162868 |
| ILMN_2878355 | NM_010655.3    | KPNA2                 | -1.663897821 |
| ILMN_2520635 | NM_145393.3    | YTHDF2                | -1.664103571 |
| ILMN_2738475 | NM_011251.2    | RBM6                  | -1.665286042 |
| ILMN_2710286 |                | C030025P15RIK         | -1.666193961 |
| ILMN_1212653 | NM_028713.1    | RFTN2                 | -1.668848217 |
| ILMN_2483493 | XM_001476407.1 | LOC100046552          | -1.674143786 |
| ILMN_2615855 | NM_182650.3    | HNRNPA2B1             | -1.674995405 |
| ILMN_1219573 |                | C130072A16RIK         | -1.675564222 |
| ILMN_2680808 | NM_019868.3    | HNRNPH2               | -1.680500162 |
| ILMN_1224644 | NM_013508.1    | ELK3                  | -1.687768179 |
| ILMN_1214609 | NM_019648.3    | METAP2                | -1.703273619 |
| ILMN_2416764 | NM_001083616.1 | CACNA1D               | -1.704726489 |
| ILMN_2769330 | NM_009852.3    | CD6                   | -1.705015163 |
| ILMN_2525855 | NM_139149.2    | FUS                   | -1.707475831 |
| ILMN_2545963 |                | HBB-B1                | -1.714678267 |
| ILMN_2628658 | NM_027439.3    | ATP6AP2               | -1.719744843 |
| ILMN_2720634 | NM_013768.2    | PRMT5                 | -1.730789117 |
| ILMN_1229203 |                | HBB-B1                | -1.7386426   |
| ILMN_1225587 | NM_138955.3    | ABCG4                 | -1.746231966 |
| ILMN_2864309 | NM_001081957.1 | OTTMUSG0000000097:    | -1.750762674 |
| ILMN_2745515 | NM_011269.1    | RHAG                  | -1.758271818 |
| ILMN_2542956 | XM_125257.1    | TERA-PENDING          | -1.771790258 |
| ILMN_3145881 | NM_001037846.1 | CNOT2                 | -1.785070161 |
| ILMN_2960325 | NM_007799.2    | CTSE                  | -1.792275319 |
| ILMN_1223244 |                | HBB-B1                | -1.792896991 |
| ILMN_1245042 |                | IGKV9-120_V00804\$J00 | -1.803178527 |
| ILMN_1214394 | NM_175836.2    | SPNB2                 | -1.803358064 |
| ILMN_2964560 | NM_053094.1    | CD163                 | -1.83207042  |
| ILMN_1229547 | NM_133903.2    | SPON2                 | -1.833528855 |
| ILMN_2443831 | NM_009457.3    | UBA1                  | -1.833746734 |
| ILMN_2432550 | NM_144551.3    | TRIB2                 | -1.840642467 |
| ILMN_1244316 |                | HBB-B1                | -1.840821078 |
| ILMN_2598532 | XM_484670.5    | EG433144              | -1.84478723  |
| ILMN_1239717 | NM_007969.4    | EXPI                  | -1.845972971 |

|              |                |                 |              |
|--------------|----------------|-----------------|--------------|
| ILMN_1255513 | NM_007672.1    | CDR2            | -1.856845621 |
| ILMN_1242935 | XM_921371.2    | LOC633016       | -1.869274337 |
| ILMN_1215167 | NM_007840.3    | DDX5            | -1.872190386 |
| ILMN_1217929 | XR_030797.1    | LOC667005       | -1.876090353 |
| ILMN_2745513 | NM_011269.2    | RHAG            | -1.877436072 |
| ILMN_1255462 |                | HBB-B1          | -1.881371964 |
| ILMN_1216412 | NM_010247.2    | XRCC6           | -1.889365216 |
| ILMN_2431390 |                | TCRB-V8.2       | -1.906230812 |
| ILMN_2550423 | AK012612.1     | SCL0002368.1_75 | -1.911638146 |
| ILMN_2733277 | NM_138756.4    | SLC25A36        | -1.911921635 |
| ILMN_1235372 | NM_008220.3    | HBB-B1          | -1.918015766 |
| ILMN_1239117 | NM_008220.3    | HBB-B1          | -1.922580948 |
| ILMN_2539917 | XM_357700.1    | LOC384538       | -1.937269494 |
| ILMN_2723108 | NM_009366.2    | TSC22D1         | -1.96391868  |
| ILMN_1224207 | NM_001081346.1 | RTKN2           | -1.994358985 |
| ILMN_2629052 |                | CBX3            | -1.99736212  |
| ILMN_2645155 | NM_010456.1    | HOXA9           | -2.011560764 |
| ILMN_2660754 |                | SPNB1           | -2.019389065 |
| ILMN_2748402 | NM_015734.1    | COL5A1          | -2.031985239 |
| ILMN_1244879 | XM_001476775.1 | LOC100046690    | -2.034316659 |
| ILMN_2627920 | NM_173014.1    | LPCAT2          | -2.048662951 |
| ILMN_1229577 | NM_009217.1    | SSTR2           | -2.055873418 |
| ILMN_2715840 | NM_007574.2    | C1QC            | -2.060329847 |
| ILMN_1257143 | NM_013848.1    | ERMAP           | -2.066158116 |
| ILMN_2630939 | NM_029810.3    | NT5C2           | -2.081623446 |
| ILMN_1237948 | NM_011570.3    | TES             | -2.092182845 |
| ILMN_2705407 | NM_008774.2    | PABPC1          | -2.097887993 |
| ILMN_2918479 | NM_031165.4    | HSPA8           | -2.101625294 |
| ILMN_2638299 |                | SLC29A1         | -2.104481297 |
| ILMN_2619620 | NM_009777.2    | C1QB            | -2.106746736 |
| ILMN_1218923 | XM_001477842.1 | LOC100041932    | -2.11365358  |
| ILMN_2642913 | NM_010128.4    | EMP1            | -2.118752357 |
| ILMN_2691187 | NM_009031.2    | RBBP7           | -2.128593408 |
| ILMN_2795178 | NM_028713.1    | RFTN2           | -2.132952777 |
| ILMN_2691192 | NM_009031.2    | RBBP7           | -2.150740393 |
| ILMN_1216452 | NM_008220.3    | HBB-B1          | -2.159961014 |
| ILMN_1237186 | NM_016907.3    | SPINT1          | -2.163715428 |
| ILMN_1245354 | NM_133211.3    | TLR7            | -2.168536712 |
| ILMN_1219275 | NM_009031.2    | RBBP7           | -2.19165277  |
| ILMN_2639036 | NM_010477.3    | HSPD1           | -2.193222687 |
| ILMN_1214650 | AK012612.1     | SCL0002368.1_75 | -2.237177115 |
| ILMN_2715601 | NM_031158.1    | ANK1            | -2.259126627 |
| ILMN_2673889 | NM_008568.1    | MCM7            | -2.267351667 |
| ILMN_2589785 | XM_001479297.1 | LOC100047856    | -2.296073636 |
| ILMN_1232884 | NM_011451.2    | SPHK1           | -2.328152612 |
| ILMN_1259714 | NM_009873.2    | CDK6            | -2.380528775 |

|              |                |               |              |
|--------------|----------------|---------------|--------------|
| ILMN_1245717 | NM_013514.3    | EPB4.9        | -2.409940403 |
| ILMN_3161601 | NM_009221.2    | SNCA          | -2.416928439 |
| ILMN_2538597 | XM_359211.1    | LOC386405     | -2.453158837 |
| ILMN_1236588 | NM_009799.4    | CAR1          | -2.458210435 |
| ILMN_2629581 | NM_009943.2    | COX6A2        | -2.463360174 |
| ILMN_1252157 | XR_001572.1    | A330102K04RIK | -2.507418276 |
| ILMN_1215076 |                | F830002E14RIK | -2.523338443 |
| ILMN_2668996 | NM_032540.2    | KEL           | -2.568580257 |
| ILMN_3136638 | NM_009221.2    | SNCA          | -2.58845103  |
| ILMN_2649773 | NM_172479.2    | SLC38A5       | -2.714730423 |
| ILMN_1241039 |                | 2510042H12RIK | -2.869452535 |
| ILMN_1241866 | NM_033264.1    | ARPP21        | -2.94504104  |
| ILMN_2718589 | NM_007995.3    | FCNA          | -3.171369477 |
| ILMN_2783997 | NM_011280.1    | TRIM10        | -3.309167116 |
| ILMN_2619200 | NM_133245.1    | ERAF          | -3.427289292 |
| ILMN_1212702 | NM_008218.2    | HBA-A1        | -3.435092798 |
| ILMN_1232383 | NM_001043228.1 | DNTT          | -3.479382529 |
| ILMN_2696696 | NM_010369.3    | GYPA          | -3.678933044 |
| ILMN_2675874 | NM_009653.1    | ALAS2         | -3.869609787 |
| ILMN_1227675 | NM_011403.1    | SLC4A1        | -4.144597802 |
| ILMN_2544056 |                | HBB-B1        | -4.436711237 |
| ILMN_1246153 | NM_133362.2    | ERDR1         | -4.990352281 |
| ILMN_2998658 | NM_133362.1    | ERDR1         | -7.268307375 |

**Supplementary Table 3: Up-regulated gene changes in TPOTg LSKs versus Mpl+/+ LSKs.** This table shows log2 fold changes for genes that are significantly differentially expressed in a positive direction between TPOTg LSKs versus Mpl+/+ LSKs. The data were generated from samples which were obtained using the Illumina gene expression platform described in SI Materials and Methods.

| ID           | GeneRef        | Symbol               | Log Fold Change |
|--------------|----------------|----------------------|-----------------|
| ILMN_1232948 |                | IGKV9-128_AJ231245_I | 4.972013053     |
| ILMN_2649286 | XM_991819.1    | LOC243431            | 4.19394923      |
| ILMN_2619428 | XM_354718.1    | IGH-V11              | 3.81929349      |
| ILMN_2631505 | XM_357633.1    | LOC384415            | 3.566487673     |
| ILMN_1217886 | XM_984967.1    | LOC675759            | 2.715137492     |
| ILMN_1222734 | NM_013467.3    | ALDH1A1              | 2.432020094     |
| ILMN_2628178 | NM_007706.3    | SOCS2                | 2.277790566     |
| ILMN_3151149 | NM_001033851.1 | CPNE8                | 2.087984108     |
| ILMN_3160292 | NM_001013785.2 | AKR1C19              | 1.836371782     |
| ILMN_2931334 | NM_021283.1    | IL4                  | 1.811199701     |
| ILMN_2731908 | XM_358637.1    | 6330405H19           | 1.759859519     |
| ILMN_2604494 | NM_013723.2    | PODXL                | 1.756310088     |
| ILMN_2771342 |                | FCER1A               | 1.643621486     |
| ILMN_1226111 | XM_001481017.1 | LOC100043821         | 1.547920827     |
| ILMN_2587711 | NM_183355.2    | PBX1                 | 1.54301509      |
| ILMN_1223708 | XM_984967.1    | LOC675759            | 1.518230489     |
| ILMN_2806439 | NM_182959.2    | SLC17A8              | 1.508678126     |
| ILMN_1229911 | NM_012026.2    | RGNEF                | 1.493088903     |
| ILMN_2619983 | NM_008304.2    | SDC2                 | 1.481070103     |
| ILMN_1215076 |                | F830002E14RIK        | 1.467582503     |
| ILMN_2690938 | NM_145920.2    | EVC2                 | 1.444381066     |
| ILMN_2635895 | NM_008880.2    | PLSCR2               | 1.429120305     |
| ILMN_1258914 | NM_175328.2    | SLC6A15              | 1.413800115     |
| ILMN_2629591 | NM_019734.1    | ASAH1                | 1.393307581     |
| ILMN_2729252 | XR_002313.1    | 5830431A10RIK        | 1.383100737     |
| ILMN_2467151 |                | CYP11A1              | 1.367870146     |
| ILMN_2834764 | NM_175271.2    | GPR23                | 1.352808109     |
| ILMN_2604501 | NM_175526.2    | CLEC1A               | 1.343679073     |
| ILMN_1221341 | XR_033502.1    | LOC100047226         | 1.343382684     |
| ILMN_1232600 | NM_026301.2    | RNF125               | 1.343279582     |
| ILMN_2742042 | NM_019738.1    | NUPR1                | 1.342309114     |
| ILMN_2631892 | NM_133880.1    | PAFAH2               | 1.341562663     |
| ILMN_1226921 | XM_001006879.1 | LOC674004            | 1.340179367     |
| ILMN_2735184 | NM_009929.2    | COL18A1              | 1.338663616     |
| ILMN_2972459 | NM_007858.2    | DIAP1                | 1.332704455     |
| ILMN_2759943 | NM_011203.2    | PTPN12               | 1.325715686     |
| ILMN_2977404 | NM_021883.1    | TMOD1                | 1.323266369     |
| ILMN_1226114 | NM_175260.2    | MYH10                | 1.314676885     |
| ILMN_1224339 | NM_198295.2    | TXNDC10              | 1.312666767     |
| ILMN_1248202 |                | ARHGEF2              | 1.306209992     |
| ILMN_2624977 |                | A730024F05RIK        | 1.298198209     |
| ILMN_2653642 | NM_029334.1    | ZC3H14               | 1.27944796      |
| ILMN_2761205 | NM_030704.1    | HSPB8                | 1.277743972     |
| ILMN_2599018 | NM_013885.2    | CLIC4                | 1.272658602     |

|              |                |                |             |
|--------------|----------------|----------------|-------------|
| ILMN_1234126 | NM_016893.4    | FUT8           | 1.26780666  |
| ILMN_2641541 | NM_007858.2    | DIAP1          | 1.259804125 |
| ILMN_1218024 |                | ARHGEF6        | 1.250563329 |
| ILMN_2663403 | XM_001481237.1 | LOC100043918   | 1.249797013 |
| ILMN_1215651 | NM_007671.2    | CDKN2C         | 1.245824747 |
| ILMN_1216898 |                | KIT            | 1.243746598 |
| ILMN_1231492 | NM_008397.3    | ITGA6          | 1.214923205 |
| ILMN_2706562 | NM_021292.1    | EVC            | 1.212558013 |
| ILMN_1225311 | NM_010509.1    | IFNAR2         | 1.208625837 |
| ILMN_2741693 | NM_198423.1    | BC060615       | 1.207910472 |
| ILMN_2673566 | NM_010124.2    | EIF4EBP2       | 1.198115635 |
| ILMN_3160137 | NM_009657.3    | ALDOC          | 1.196677468 |
| ILMN_1219298 | NM_026639.2    | ART4           | 1.190124181 |
| ILMN_2649456 | NM_030024.2    | PRR15          | 1.184103444 |
| ILMN_1242660 | XM_001476443.1 | LOC100041450   | 1.17299782  |
| ILMN_1232435 | XM_284198.5    | MMRN1          | 1.16048145  |
| ILMN_1230021 |                | CYP2J9         | 1.160374417 |
| ILMN_1228983 |                | E330039I02RIK  | 1.157514296 |
| ILMN_2427307 | NM_027711.1    | IQGAP2         | 1.152386909 |
| ILMN_2913222 | NM_001025103.1 | EFCAB4A        | 1.143796218 |
| ILMN_2422042 | BC033468.1     | SCL000981.1_40 | 1.13635483  |
| ILMN_1237375 | NM_009127.3    | SCD1           | 1.128662058 |
| ILMN_2825080 | NM_027570.3    | LDHD           | 1.127519588 |
| ILMN_2621012 | NM_028030.3    | RBPMS2         | 1.125228189 |
| ILMN_2721571 | NM_013730.4    | SLAMF1         | 1.124640556 |
| ILMN_1232989 | NM_020578.2    | EHD3           | 1.122059156 |
| ILMN_1216546 | NM_027121.2    | VKORC1L1       | 1.120947011 |
| ILMN_1217809 | XM_356568.1    | LOC382557      | 1.11840039  |
| ILMN_2504823 | NM_172570.4    | TRIM47         | 1.115356442 |
| ILMN_2739651 | NM_009688.1    | BIRC4          | 1.113227539 |
| ILMN_1230281 | NM_052976.3    | OPHN1          | 1.111108373 |
| ILMN_2998738 | NM_198657.1    | EG381438       | 1.103302655 |
| ILMN_2562831 |                | CCNI           | 1.101885817 |
| ILMN_2745370 | NM_133670.1    | SULT1A1        | 1.099018693 |
| ILMN_2789239 | NM_011578.2    | TGFBR3         | 1.098974445 |
| ILMN_2947526 | NM_007899.1    | ECM1           | 1.09759223  |
| ILMN_2670775 | XM_916109.2    | C530008M17RIK  | 1.091560611 |
| ILMN_2694960 | NM_010833.2    | MSN            | 1.08123891  |
| ILMN_3163335 | NM_011229.1    | RAB5B          | 1.080605637 |
| ILMN_2715304 | NM_026267.1    | NECAP1         | 1.08016653  |
| ILMN_1225535 | NM_008060.1    | GANAB          | 1.079430452 |
| ILMN_3047389 | NM_010260.1    | GBP2           | 1.077995943 |
| ILMN_2720663 | NM_001025103.1 | EFCAB4A        | 1.071885357 |
| ILMN_2708211 | NM_019547.2    | RBM38          | 1.069603116 |
| ILMN_1242977 | NM_008268.1    | HOXB5          | 1.06357346  |
| ILMN_2795412 | NM_025326.2    | TMEM176A       | 1.059566126 |
| ILMN_2757634 | NM_027828.2    | 9030611O19RIK  | 1.052041543 |
| ILMN_2917338 | NM_026301.1    | RNF125         | 1.044478946 |
| ILMN_2829604 | NM_007378.1    | ABCA4          | 1.044427698 |
| ILMN_1254015 | NM_013777.2    | AKR1C12        | 1.039104207 |

|              |                |               |             |
|--------------|----------------|---------------|-------------|
| ILMN_2659063 | NM_013457.2    | ADD1          | 1.035978763 |
| ILMN_1234190 | XM_357002.5    | PSMA8         | 1.031450487 |
| ILMN_2739303 | NM_172523.2    | SLC18A2       | 1.026662408 |
| ILMN_1242617 |                | GPR23         | 1.023341687 |
| ILMN_2700338 | NM_198302.2    | RBM11         | 1.022619245 |
| ILMN_2623776 | NM_007945.2    | EPS8          | 1.021097394 |
| ILMN_2681805 | NM_010739.1    | MUC13         | 1.020960018 |
| ILMN_1232165 | XM_138691.2    | MGC60742      | 1.01973214  |
| ILMN_2708263 | NM_145527.3    | MADD          | 1.01970551  |
| ILMN_2598883 | NM_178627.3    | POLDIP3       | 1.016906591 |
| ILMN_1229343 | NM_001083341.1 | MBOAT2        | 1.016700966 |
| ILMN_1252898 |                | SOX6          | 1.015908254 |
| ILMN_2510683 | NM_145441.3    | UBXD4         | 1.015071089 |
| ILMN_2606990 | NM_023066.2    | ASPH          | 1.013165416 |
| ILMN_2646550 | XM_133396.3    | 9430025M13RIK | 1.002194367 |
| ILMN_2606564 | NM_026195.2    | ATIC          | 1.002143098 |
| ILMN_3092415 | NM_153198.1    | HBP1          | 1.002127298 |
| ILMN_1259714 | NM_009873.2    | CDK6          | 1.000923634 |
| ILMN_2704619 | NM_172274.1    | CC2D2A        | 0.998786077 |
| ILMN_2497067 | NM_144516.1    | ZMYND11       | 0.996772186 |
| ILMN_2860242 | NM_029436.3    | KLHL24        | 0.990612904 |
| ILMN_2644025 | NM_010438.2    | HK1           | 0.990353544 |
| ILMN_1235833 | XM_001480577.1 | ZFP422-RS1    | 0.987535435 |
| ILMN_2710942 | NM_009693.1    | APOB          | 0.987166933 |
| ILMN_2619249 | NM_172926.2    | SNX14         | 0.983074646 |
| ILMN_1242469 | NM_028657.1    | F630110N24RIK | 0.982325984 |
| ILMN_2694175 | NM_011925.1    | CD97          | 0.982261802 |
| ILMN_2815138 | NM_010867.1    | MYOM1         | 0.982192276 |
| ILMN_2939503 | NM_153392.1    | 4922503N01RIK | 0.981094598 |
| ILMN_1219304 | NM_001012638.1 | ACD           | 0.979754725 |
| ILMN_1233864 | NM_008969.3    | PTGS1         | 0.97655113  |
| ILMN_2651197 | NM_011203.2    | PTPN12        | 0.966227793 |
| ILMN_2481902 |                | PLXNC1        | 0.961410938 |
| ILMN_2759944 | NM_011203.2    | PTPN12        | 0.956439785 |
| ILMN_1258474 | NM_177389.3    | MIA3          | 0.955872671 |
| ILMN_2741694 | NM_198423.1    | BC060615      | 0.952652245 |
| ILMN_2639662 | NM_027570.3    | LDHD          | 0.952468901 |
| ILMN_2706587 | NM_009386.1    | TJP1          | 0.951779915 |
| ILMN_1224069 | NM_001033217.3 | PRICKLE1      | 0.950259557 |
| ILMN_2671984 | NM_011210.2    | PTPRC         | 0.950206193 |
| ILMN_2725414 | NM_007657.2    | CD9           | 0.949179402 |
| ILMN_2694170 | NM_011925.1    | CD97          | 0.94824157  |
| ILMN_1214322 |                | C630030D09RIK | 0.937761541 |
| ILMN_1243992 | NM_008986.1    | PTRF          | 0.93495716  |
| ILMN_1220664 | NM_016965.2    | NCKAP1        | 0.930899858 |
| ILMN_2684268 | NM_145926.2    | MGAT4B        | 0.929853026 |
| ILMN_3132186 | NM_177546.2    | PCYT1B        | 0.927362988 |
| ILMN_1241211 | NM_021896.4    | GUCY1A3       | 0.920342847 |
| ILMN_2759945 | NM_011203.2    | PTPN12        | 0.917943222 |
| ILMN_2662576 | XM_283678.1    | A430110L20RIK | 0.917004414 |

|              |                |               |             |
|--------------|----------------|---------------|-------------|
| ILMN_2468327 |                | JMJD2A        | 0.916388261 |
| ILMN_2518618 | NM_011273.1    | XPR1          | 0.916369153 |
| ILMN_1229313 | NM_001013771.2 | GM973         | 0.914063508 |
| ILMN_2522127 |                | MYO1E         | 0.913975292 |
| ILMN_3129213 | NM_001002272.2 | TRO           | 0.913726966 |
| ILMN_1247460 | NM_133752.2    | OPA1          | 0.910061148 |
| ILMN_2860244 | NM_029436.3    | KLHL24        | 0.909634245 |
| ILMN_2650725 | NM_198113.2    | SSH3          | 0.904570118 |
| ILMN_1244460 | NM_010107.3    | EFNA1         | 0.90011768  |
| ILMN_2587005 |                | 4931403I22RIK | 0.896447335 |
| ILMN_2613313 | NM_177727.4    | LSM14B        | 0.894552023 |
| ILMN_2680533 | NM_008185.2    | GSTT1         | 0.893414049 |
| ILMN_2683980 | NM_010828.2    | CITED2        | 0.892661945 |
| ILMN_2745055 | NM_080288.1    | ELMO1         | 0.891829663 |
| ILMN_2606746 | NM_009801.3    | CAR2          | 0.891584868 |
| ILMN_2749471 | NM_016893.4    | FUT8          | 0.890067238 |
| ILMN_1259424 | XM_147215.1    | ZFP288        | 0.888521007 |
| ILMN_2608429 | NM_013477.3    | ATP6V0D1      | 0.88577877  |
| ILMN_2627140 | XM_283804.7    | 9830001H06RIK | 0.878737171 |
| ILMN_2606601 |                | TGFBR3        | 0.877542261 |
| ILMN_1217118 | NM_032003.1    | ENPP5         | 0.876607849 |
| ILMN_2758878 | NM_026432.2    | TMEM66        | 0.876020932 |
| ILMN_2678745 | XM_147000.1    | 2300004C15RIK | 0.872082328 |
| ILMN_1224644 | NM_013508.1    | ELK3          | 0.870739331 |
| ILMN_2733314 | NM_029879.2    | RGS7BP        | 0.863738828 |
| ILMN_3149251 | NM_008133.3    | GLUD1         | 0.863554805 |
| ILMN_1250195 | NM_008681.2    | NDRG1         | 0.861908015 |
| ILMN_2680054 | NM_053078.3    | DOH4S114      | 0.859369488 |
| ILMN_2497068 | NM_144516.2    | ZMYND11       | 0.857677222 |
| ILMN_1224572 | NM_001001881.1 | 2510009E07RIK | 0.857421146 |
| ILMN_1216718 | NM_011462.2    | SPIN1         | 0.854892549 |
| ILMN_1244530 |                | E330011I20RIK | 0.853019409 |
| ILMN_2677712 | NM_007480.1    | ARF5          | 0.851973159 |
| ILMN_1220170 | NM_013690.2    | TEK           | 0.85179216  |
| ILMN_1225522 | NM_019828.1    | TRPC4AP       | 0.850866888 |
| ILMN_2730831 | XM_130609.2    | 4921517L17RIK | 0.850374995 |
| ILMN_2937674 | NM_198671.1    | GSE1          | 0.849471489 |
| ILMN_2658815 | NM_029537.1    | TMEM98        | 0.848397125 |
| ILMN_1245356 | NM_011421.1    | SMPD1         | 0.840570842 |
| ILMN_2747735 | NM_133704.4    | SEC22A        | 0.839505586 |
| ILMN_2769971 | NM_153408.2    | LINCR         | 0.838915194 |
| ILMN_2620122 | NM_011026.2    | P2RX4         | 0.832429342 |
| ILMN_1249863 | NM_013730.4    | SLAMF1        | 0.830775099 |
| ILMN_1243082 | NM_029679.1    | 6330500D04RIK | 0.830236557 |
| ILMN_2625601 | NM_019990.4    | STARD10       | 0.821241182 |
| ILMN_1257107 | XM_001481017.1 | LOC100043821  | 0.820249965 |
| ILMN_1226103 | NM_027472.2    | 5730455P16RIK | 0.818140556 |
| ILMN_2576336 |                | C130052O15RIK | 0.815662291 |
| ILMN_2646166 |                | NDRL          | 0.811358978 |
| ILMN_2742461 |                | PPP2R5C       | 0.810430829 |



|              |                |                |             |
|--------------|----------------|----------------|-------------|
| ILMN_2717127 | NM_172689.3    | DDX58          | 0.809319812 |
| ILMN_2610156 | NM_008684.1    | NEO1           | 0.806840973 |
| ILMN_2547482 |                | PIGN           | 0.806651093 |
| ILMN_2588682 | NM_177583.4    | APH1B          | 0.80312906  |
| ILMN_1230878 | NM_010395.5    | H2-T10         | 0.802958305 |
| ILMN_1249032 | NM_175245.2    | 2410129H14RIK  | 0.799524781 |
| ILMN_1219016 | NM_133784.2    | WWTR1          | 0.797894135 |
| ILMN_2733492 | XM_911470.2    | DDHD2          | 0.791232285 |
| ILMN_1252806 | XM_196179.2    | LOC268934      | 0.788624859 |
| ILMN_2822915 | NM_172827.1    | LNPEP          | 0.786431999 |
| ILMN_2603647 | NM_053109.2    | CLEC2D         | 0.786182833 |
| ILMN_1241414 |                | 4930429A08RIK  | 0.784049385 |
| ILMN_2603888 | NM_153392.1    | 4922503N01RIK  | 0.78081912  |
| ILMN_2735865 | NM_009708.1    | RND2           | 0.778618677 |
| ILMN_1228211 | NM_009363.3    | TFF2           | 0.775352011 |
| ILMN_3072337 | NM_001033851.1 | CPNE8          | 0.773375736 |
| ILMN_3084087 | NM_001039511.1 | IVNS1ABP       | 0.773011153 |
| ILMN_2741277 | NM_033174.2    | SNURF          | 0.772665852 |
| ILMN_1241890 |                | KLF7           | 0.772371677 |
| ILMN_1247017 | NM_146112.3    | TNRC15         | 0.767706264 |
| ILMN_2767635 | NM_029478.3    | TMEM49         | 0.766003863 |
| ILMN_2460662 | NM_009452.1    | TNFSF4         | 0.765551135 |
| ILMN_2749448 | NM_153119.2    | PLEKHO2        | 0.762856571 |
| ILMN_2741464 | NM_172731.1    | FGD5           | 0.75824002  |
| ILMN_2728521 | NM_011421.1    | SMPD1          | 0.756454107 |
| ILMN_1219568 | NM_016881.2    | PMM2           | 0.752157619 |
| ILMN_2499305 | NM_183355.2    | PBX1           | 0.750493022 |
| ILMN_1213448 | XM_976371.1    | LOC669658      | 0.750083039 |
| ILMN_2675000 | NM_029070.2    | 4930511J11RIK  | 0.747512071 |
| ILMN_2740852 | NM_010169.3    | F2R            | 0.746687417 |
| ILMN_2773215 | XM_001476174.1 | EPB4.1L4B      | 0.74528881  |
| ILMN_2594419 | NM_018771.3    | GIPC1          | 0.745114835 |
| ILMN_1246301 | BC019166.1     | SCL0002275.1_1 | 0.744959981 |
| ILMN_2627006 | XM_001002157.2 | AKAP11         | 0.74471669  |
| ILMN_2775016 |                | FZD6           | 0.742970068 |
| ILMN_2445658 | XM_913941.2    | IGSF10         | 0.742157852 |
| ILMN_2753077 | NM_177231.2    | ARRB1          | 0.741912973 |
| ILMN_2737658 | NM_133667.1    | PKD2           | 0.741848927 |
| ILMN_2911344 | NM_011636.1    | PLSCR1         | 0.736689155 |
| ILMN_2630827 | NM_133858.3    | 4930504E06RIK  | 0.734760641 |
| ILMN_2805375 | NM_021359.2    | ITGB6          | 0.734530606 |
| ILMN_2791028 | NM_007471.2    | APP            | 0.73326377  |
| ILMN_2546905 | XM_001472182.1 | LOC100044395   | 0.732803335 |
| ILMN_2734181 | NM_019811.3    | ACSS2          | 0.731529997 |
| ILMN_1220243 | XM_358834.1    | LOC385644      | 0.726831567 |
| ILMN_2598532 | XM_484670.5    | EG433144       | 0.726479933 |
| ILMN_3159149 | NM_199057.2    | RUSC2          | 0.726350218 |
| ILMN_2665948 | NM_026163.2    | PKP2           | 0.723214384 |
| ILMN_3106388 | NM_001080118.1 | MED1           | 0.721271719 |
| ILMN_2741872 | NM_177171.4    | HEATR5A        | 0.719605098 |

|              |                |                 |             |
|--------------|----------------|-----------------|-------------|
| ILMN_1252288 |                | 2010007H06RIK   | 0.717614775 |
| ILMN_2687165 | NM_018763.1    | CHST2           | 0.716725085 |
| ILMN_2745741 | NM_172606.2    | MARCH6          | 0.715353206 |
| ILMN_2751207 | NM_008054.1    | FYN             | 0.712266084 |
| ILMN_3072536 | NM_173363.4    | EIF5            | 0.709834096 |
| ILMN_3096144 | NM_011486.4    | STAT3           | 0.709322574 |
| ILMN_1259749 |                | C030013C21RIK   | 0.70629528  |
| ILMN_1259022 | NM_001081006.1 | ETL4            | 0.705347112 |
| ILMN_2492377 | NM_023230.2    | UBE2V1          | 0.702840196 |
| ILMN_2648661 | NM_007598.2    | CAP1            | 0.696491287 |
| ILMN_2440059 | AF390178.1     | SCL0001533.1_63 | 0.695952576 |
| ILMN_1224116 | NM_020561.2    | SMPDL3A         | 0.693185833 |
| ILMN_2701271 | NM_011636.1    | PLSCR1          | 0.690385083 |
| ILMN_2742942 | NM_026817.3    | RABL2A          | 0.688989161 |
| ILMN_1233752 | NM_001083341.1 | MBOAT2          | 0.687754382 |
| ILMN_3160863 | NM_026725.2    | DUSP23          | 0.687337528 |
| ILMN_1233678 | NM_008364.1    | IL1RAP          | 0.687105176 |
| ILMN_2482766 | NM_009433.2    | TSPYL1          | 0.685720464 |
| ILMN_2632206 | NM_022000.2    | GNAS            | 0.683679627 |
| ILMN_1220813 | NM_001013371.2 | DTX3L           | 0.683247642 |
| ILMN_2600053 | NM_024211.2    | SLC25A11        | 0.675066375 |
| ILMN_2544674 |                | 2310045K21RIK   | 0.673445392 |
| ILMN_1231254 | NM_008007.1    | FGF3            | 0.672987267 |
| ILMN_1224714 | XM_988632.2    | LOC634731       | 0.672072555 |
| ILMN_1222036 | NM_027995.2    | PAQR7           | 0.669326032 |
| ILMN_2775064 | XM_001476174.1 | EPB4.1L4B       | 0.667740253 |
| ILMN_2612283 | NM_008090.4    | GATA2           | 0.665968293 |
| ILMN_2772248 |                | CAPNS1          | 0.65282083  |
| ILMN_2728796 | NM_181344.4    | C1RL            | 0.649191621 |
| ILMN_2604256 | XM_485050.5    | LOC433464       | 0.640871111 |
| ILMN_3145814 | NM_001081079.1 | OGFRL1          | 0.64037838  |
| ILMN_3064669 | NM_001045483.1 | MAPK1IP1        | 0.639987385 |
| ILMN_1248622 |                | E130309K17RIK   | 0.63627387  |
| ILMN_2993836 | NM_016747.2    | DLG3            | 0.633779412 |
| ILMN_1253986 | XM_981375.2    | DLG5            | 0.630556447 |
| ILMN_2776304 | NM_011591.4    | TIMM17B         | 0.628616652 |
| ILMN_2752873 | NM_010708.1    | LGALS9          | 0.627603438 |
| ILMN_1227460 |                | 2700089E24RIK   | 0.623093477 |
| ILMN_2594205 | NM_026033.1    | GATAD1          | 0.622279026 |
| ILMN_2710705 | NM_011018.2    | SQSTM1          | 0.617360312 |
| ILMN_1260417 |                | 4732423C17RIK   | 0.606078652 |
| ILMN_2568516 |                | RBPMS           | 0.602146442 |
| ILMN_2541190 | XM_912953.3    | 1500034J01RIK   | 0.601681471 |
| ILMN_1235494 | NM_025439.2    | TMEM9           | 0.599091563 |
| ILMN_2678400 | NM_133766.1    | C920006C10RIK   | 0.597595002 |
| ILMN_1232099 | NM_019793.2    | TSPAN3          | 0.594479725 |
| ILMN_2725617 | NM_008439.3    | KHK             | 0.594341099 |
| ILMN_2717251 | NM_001080818.1 | CDC14A          | 0.593492261 |
| ILMN_2454204 |                | TNFRSF22        | 0.587235888 |
| ILMN_3115162 | NM_001048177.1 | JAK2            | 0.57914893  |

|              |                |               |             |
|--------------|----------------|---------------|-------------|
| ILMN_2461320 |                | AU020206      | 0.571697356 |
| ILMN_2972063 | NM_027086.1    | UBL7          | 0.568169554 |
| ILMN_2615601 | NM_028776.4    | SCYL3         | 0.56574517  |
| ILMN_1221458 | NM_029074.2    | TMEM188       | 0.564610489 |
| ILMN_2693679 | NM_183115.3    | CCDC125       | 0.557220908 |
| ILMN_2557387 |                | E430005I09RIK | 0.554483981 |
| ILMN_2607786 | NM_146094.1    | FADS1         | 0.553221073 |
| ILMN_2741465 | NM_172731.2    | FGD5          | 0.547589158 |
| ILMN_2501489 | NM_009515.1    | WAS           | 0.54142052  |
| ILMN_1249219 |                | 2310011G17RIK | 0.532749488 |
| ILMN_3105205 | NM_001039533.1 | PDXDC1        | 0.532169838 |
| ILMN_1257193 | NM_008910.2    | PPM1A         | 0.531819674 |
| ILMN_2667618 | NM_017478.2    | COPG2         | 0.531419618 |
| ILMN_2810882 | NM_008908.1    | PPIC          | 0.530813312 |
| ILMN_2710338 | NM_013582.2    | LHCGR         | 0.527886694 |
| ILMN_2794825 | NM_153083.2    | THTPA         | 0.525598901 |
| ILMN_2520326 |                | NBEA          | 0.524175352 |
| ILMN_2676876 | NM_145630.2    | PDK3          | 0.521026545 |
| ILMN_1232025 | NM_028036.3    | TMCO6         | 0.518542572 |
| ILMN_2680142 | NM_009673.1    | ANXA5         | 0.511801841 |
| ILMN_1233970 | NM_177231.2    | ARRB1         | 0.509746762 |
| ILMN_1249882 | XM_127578.2    | 4933425A18RIK | 0.508812639 |
| ILMN_2592093 | NM_018854.3    | IFT20         | 0.507159841 |
| ILMN_1219067 | NM_146115.3    | A830007P12RIK | 0.501599084 |
| ILMN_1256354 | NM_008129.3    | GCLM          | 0.491216735 |
| ILMN_2686125 | NM_145426.2    | MFAP3         | 0.488744476 |
| ILMN_1237670 | NM_009849.1    | ENTPD2        | 0.487284744 |
| ILMN_1256012 | NM_181326.3    | ZFP521        | 0.484513737 |
| ILMN_2683128 | NM_009908.1    | CMAS          | 0.481153337 |
| ILMN_2745036 | NM_024191.1    | ARL2BP        | 0.480691504 |
| ILMN_1238436 | NM_009946.2    | CPLX2         | 0.4791412   |
| ILMN_1220569 |                | 5730589K01RIK | 0.476387925 |
| ILMN_2606243 | NM_016891.3    | PPP2R1A       | 0.448658977 |
| ILMN_2760979 | NM_009371.2    | TGFBR2        | 0.44361108  |
| ILMN_3135697 | NM_181274.3    | 1200003I07RIK | 0.410837435 |
| ILMN_2511953 | NM_134131.1    | TNFAIP8       | 0.404735242 |

**Supplementary Table 4: Up-regulated gene changes in Mpl<sup>-/-</sup> LSKs versus Mpl<sup>+/+</sup> LSKs.**

This table shows log<sub>2</sub> fold changes for genes that are significantly differentially expressed in a positive direction between Mpl<sup>-/-</sup> LSKs versus Mpl<sup>+/+</sup> LSKs. These data were generated from samples which were obtained using the Illumina gene expression platform described in SI Materials and Methods.

| ID           | GeneRef        | Symbol        | Log Fold Change |
|--------------|----------------|---------------|-----------------|
| ILMN_2998658 | NM_133362.1    | ERDR1         | 8.954391785     |
| ILMN_1246153 | NM_133362.2    | ERDR1         | 6.816476343     |
| ILMN_3159435 | NM_183151.1    | MID1          | 5.084532231     |
| ILMN_2617920 | NM_028624.1    | 1110017D15RIK | 4.197388718     |
| ILMN_2536068 | XM_357269.1    | LOC383809     | 2.525455242     |
| ILMN_2705166 | NM_145933.3    | ST6GAL1       | 1.994772367     |
| ILMN_1238102 |                | IDE           | 1.992559259     |
| ILMN_2648661 | NM_007598.2    | CAP1          | 1.930166378     |
| ILMN_1240317 |                | A430059D01RIK | 1.872659459     |
| ILMN_2619452 | NM_010797.1    | MID1          | 1.826208065     |
| ILMN_1232383 | NM_001043228.1 | DNTT          | 1.777905687     |
| ILMN_1257143 | NM_013848.1    | ERMAP         | 1.691793303     |
| ILMN_2629581 | NM_009943.2    | COX6A2        | 1.661529528     |
| ILMN_2680827 | NM_008372.3    | IL7R          | 1.654416671     |
| ILMN_1241866 | NM_033264.1    | ARPP21        | 1.61123036      |
| ILMN_1215076 |                | F830002E14RIK | 1.582448448     |
| ILMN_1223539 | NM_001001491.1 | TPM4          | 1.468819636     |
| ILMN_2624977 |                | A730024F05RIK | 1.43964822      |
| ILMN_2837396 | NM_001005788.2 | ZFP69         | 1.432101011     |
| ILMN_2606825 | NM_007717.1    | CMAH          | 1.429516631     |
| ILMN_1252488 | NM_020257.1    | CLEC2I        | 1.418652116     |
| ILMN_2653642 | NM_029334.1    | ZC3H14        | 1.395674153     |
| ILMN_2582171 |                | A630098G22RIK | 1.385791604     |
| ILMN_2746283 | NM_194464.2    | MRVI1         | 1.372190135     |
| ILMN_2680737 |                | GRIA2         | 1.364734143     |
| ILMN_1226921 | XM_001006879.1 | LOC674004     | 1.351829981     |
| ILMN_2705196 | NM_001008549.1 | BC043301      | 1.341363717     |
| ILMN_1225311 | NM_010509.1    | IFNAR2        | 1.328769361     |
| ILMN_2939503 | NM_153392.1    | 4922503N01RIK | 1.322898072     |
| ILMN_3103575 | NM_001012451.1 | ANKRD6        | 1.312720773     |
| ILMN_2639036 | NM_010477.3    | HSPD1         | 1.312272254     |
| ILMN_1245354 | NM_133211.3    | TLR7          | 1.309355795     |
| ILMN_2673566 | NM_010124.2    | EIF4EBP2      | 1.298915756     |
| ILMN_1216546 | NM_027121.2    | VKORC1L1      | 1.293619373     |
| ILMN_2797973 | NM_008828.2    | PGK1          | 1.29214651      |
| ILMN_2804559 | NM_178638.2    | TMEM108       | 1.251887697     |
| ILMN_2683718 | NM_028233.2    | LRPPRC        | 1.248314477     |
| ILMN_1218024 |                | ARHGEF6       | 1.244257571     |
| ILMN_1224339 | NM_198295.2    | TXNDC10       | 1.24367764      |
| ILMN_2571492 |                | IQGAP1        | 1.243456866     |

|              |                |                |             |
|--------------|----------------|----------------|-------------|
| ILMN_1256084 |                | PPP1R1C        | 1.242746907 |
| ILMN_2637113 | NM_177909.2    | SLC9A9         | 1.242563514 |
| ILMN_3126646 | NM_130891.1    | GRIP1          | 1.242348791 |
| ILMN_2515273 | NM_011978.2    | SLC27A2        | 1.228755015 |
| ILMN_1215280 | XM_128487.2    | LOC224732      | 1.218953225 |
| ILMN_1249305 | XR_002517.1    | LOC209281      | 1.218535511 |
| ILMN_2599018 | NM_013885.2    | CLIC4          | 1.216499038 |
| ILMN_1235833 | XM_001480577.1 | ZFP422-RS1     | 1.216062842 |
| ILMN_1254898 |                | 9830004G04RIK  | 1.200026963 |
| ILMN_3107690 | NM_028527.1    | 1700047I17RIK1 | 1.195357688 |
| ILMN_2712498 | NM_001013368.4 | E2F8           | 1.192450161 |
| ILMN_2827588 | NM_010029.1    | DDX4           | 1.185990185 |
| ILMN_2852380 | NM_011899.3    | SRP54          | 1.184837968 |
| ILMN_2538277 | XM_359103.1    | LOC386168      | 1.173251513 |
| ILMN_1245292 | NM_019869.2    | RBM14          | 1.160948046 |
| ILMN_1217302 | NM_009211.2    | SMARCC1        | 1.151013811 |
| ILMN_1260417 |                | 4732423C17RIK  | 1.145011853 |
| ILMN_2613313 | NM_177727.4    | LSM14B         | 1.144092645 |
| ILMN_2541584 | XM_356181.1    | LOC382100      | 1.127807852 |
| ILMN_1242700 | NM_029701.1    | SPCS3          | 1.119718647 |
| ILMN_1258474 | NM_177389.3    | MIA3           | 1.116037902 |
| ILMN_2653681 | NM_023858.2    | MTMR2          | 1.113866616 |
| ILMN_2526382 | XM_355225.1    | LOC381285      | 1.110758233 |
| ILMN_1236349 | NM_027946.3    | WDR68          | 1.106436766 |
| ILMN_2669912 | NM_008737.1    | NRP1           | 1.094169732 |
| ILMN_2510683 | NM_145441.3    | UBXD4          | 1.093876554 |
| ILMN_1244600 | NM_001040396.2 | 2810407C02RIK  | 1.08790631  |
| ILMN_2704496 | NM_198607.1    | 4930572J05RIK  | 1.08507662  |
| ILMN_2477213 | XM_001473915.1 | LOC100045240   | 1.07337191  |
| ILMN_2606564 | NM_026195.2    | ATIC           | 1.063774536 |
| ILMN_2505307 | NM_013771.4    | YME1L1         | 1.059853008 |
| ILMN_2745480 | NM_010200.2    | FGF13          | 1.053988916 |
| ILMN_1250501 | NM_010147.3    | EPN1           | 1.050451213 |
| ILMN_1247030 |                | PPP1R1C        | 1.049169655 |
| ILMN_2684268 | NM_145926.2    | MGAT4B         | 1.045829879 |
| ILMN_1227464 |                | 9930122J16RIK  | 1.041627805 |
| ILMN_2558167 |                | 9330158N06RIK  | 1.026989272 |
| ILMN_1227671 | NM_013496.2    | CRABP1         | 1.025562462 |
| ILMN_2728729 | NM_011521.2    | SDC4           | 1.019791198 |
| ILMN_3114998 | NM_001008549.1 | BC043301       | 1.018647343 |
| ILMN_2827267 | NM_001003666.2 | ZFP457         | 1.018635921 |
| ILMN_1232165 | XM_138691.2    | MGC60742       | 1.014698608 |
| ILMN_1216412 | NM_010247.2    | XRCC6          | 1.012481692 |
| ILMN_1259419 | XM_914270.2    | CNOT1          | 1.009831609 |
| ILMN_2675223 | NM_021293.2    | CD33           | 1.006608872 |
| ILMN_2759943 | NM_011203.2    | PTPN12         | 1.005607675 |

|              |                |               |             |
|--------------|----------------|---------------|-------------|
| ILMN_2642913 | NM_010128.4    | EMP1          | 1.001191353 |
| ILMN_2908022 | NM_172405.1    | CCDC98        | 0.998936686 |
| ILMN_1240752 |                | A630054N20RIK | 0.992305888 |
| ILMN_2621122 | NM_180600.2    | UBE2Q2        | 0.987930807 |
| ILMN_2740568 | NM_008173.3    | NR3C1         | 0.986999688 |
| ILMN_1255419 |                | ZFPN1A1       | 0.986153188 |
| ILMN_1253996 | NM_054089.2    | NCOA6IP       | 0.983052076 |
| ILMN_2689473 | NM_007381.3    | ACADL         | 0.979763368 |
| ILMN_1248202 |                | ARHGEF2       | 0.978071702 |
| ILMN_2745055 | NM_080288.1    | ELMO1         | 0.977738251 |
| ILMN_2528860 | XM_354869.1    | LOC380959     | 0.971197971 |
| ILMN_1259769 | NM_008774.2    | PABPC1        | 0.970076677 |
| ILMN_1234336 | NM_139117.2    | CSDA          | 0.963301688 |
| ILMN_2616768 | NM_029478.3    | TMEM49        | 0.962685453 |
| ILMN_1220441 | NM_177343.3    | CAMK1D        | 0.961394255 |
| ILMN_3042324 | NM_001013391.1 | CPSF6         | 0.960385419 |
| ILMN_2702374 | NM_177167.4    | PPM1E         | 0.954696238 |
| ILMN_2560602 | XM_001001363.1 | CENTD1        | 0.951532838 |
| ILMN_1252806 | XM_196179.2    | LOC268934     | 0.947131193 |
| ILMN_2822915 | NM_172827.1    | LNPEP         | 0.944986953 |
| ILMN_2774140 | NM_013686.3    | TCP1          | 0.944597633 |
| ILMN_2603976 |                | F730031O20RIK | 0.941059287 |
| ILMN_1236599 | XR_032463.1    | LOC546090     | 0.934540891 |
| ILMN_1231873 | NM_019770.2    | TMED2         | 0.932848282 |
| ILMN_2670662 | NM_144901.2    | CSDE1         | 0.930986399 |
| ILMN_2509139 | NM_028173.3    | TRAM1         | 0.929278817 |
| ILMN_1247460 | NM_133752.2    | OPA1          | 0.927043166 |
| ILMN_2720836 | NM_178446.2    | RBM47         | 0.925172154 |
| ILMN_2739651 | NM_009688.1    | BIRC4         | 0.923579927 |
| ILMN_1246359 | XR_033125.1    | LOC100047009  | 0.921286623 |
| ILMN_2606567 | NM_026195.1    | ATIC          | 0.918191469 |
| ILMN_2625058 | NM_133714.4    | 2310037I24RIK | 0.91565254  |
| ILMN_2711615 | NM_008362.1    | IL1R1         | 0.912557911 |
| ILMN_2671984 | NM_011210.2    | PTPRC         | 0.912523101 |
| ILMN_2544674 |                | 2310045K21RIK | 0.9103057   |
| ILMN_2759944 | NM_011203.2    | PTPN12        | 0.908174219 |
| ILMN_2432039 | NM_198416.1    | ZZZ3          | 0.90415063  |
| ILMN_2687602 | NM_011138.1    | POU2F2        | 0.903955631 |
| ILMN_1257279 | NM_172120.3    | VPS41         | 0.900574169 |
| ILMN_2529490 | NM_001033634.2 | ZYG11B        | 0.8978995   |
| ILMN_2692484 |                | KLHL5         | 0.897207477 |
| ILMN_2499888 | NM_198416.2    | ZZZ3          | 0.894707926 |
| ILMN_2603888 | NM_153392.1    | 4922503N01RIK | 0.892687625 |
| ILMN_1240218 | NM_018889.2    | PIGB          | 0.884798627 |
| ILMN_2539454 | XM_001479143.1 | LOC100042952  | 0.884754349 |
| ILMN_2658827 | NM_139299.1    | IL31RA        | 0.883469869 |

|              |                |                  |             |
|--------------|----------------|------------------|-------------|
| ILMN_2648047 | XM_357858.1    | 2010309E21RIK    | 0.883356903 |
| ILMN_2675239 | NM_001009949.1 | MCART1           | 0.882312243 |
| ILMN_2908687 | NM_207246.2    | RASGRP3          | 0.880725418 |
| ILMN_3034034 | NM_028527.1    | 1700047I17RIK1   | 0.879208365 |
| ILMN_2547482 |                | PIGN             | 0.877999893 |
| ILMN_2640789 | NM_177547.3    | SGK3             | 0.874702855 |
| ILMN_2620934 | XM_910859.3    | MACF1            | 0.870321996 |
| ILMN_1251169 | XM_130859.4    | 4631434O19RIK    | 0.868594619 |
| ILMN_1260372 | NM_013753.1    | X99384           | 0.865108178 |
| ILMN_2750098 | NM_134078.3    | CHMP7            | 0.86456254  |
| ILMN_1230221 | NM_133714.4    | 2310037I24RIK    | 0.861566284 |
| ILMN_2471289 | NM_020267.2    | TRIM44           | 0.861076287 |
| ILMN_1233545 | NM_029999.3    | LBH              | 0.861074793 |
| ILMN_1256395 |                | E130208E03RIK    | 0.860794153 |
| ILMN_2736168 | NM_008917.2    | PPT1             | 0.859469016 |
| ILMN_1224653 | XR_032194.1    | LOC432730        | 0.858481732 |
| ILMN_2985484 | NM_001081411.1 | SCLT1            | 0.857688179 |
| ILMN_3149251 | NM_008133.3    | GLUD1            | 0.855971494 |
| ILMN_2736762 | NM_025903.1    | IFRD2            | 0.855923634 |
| ILMN_3122922 | NM_001039195.1 | GRIA2            | 0.85371629  |
| ILMN_3065373 | NM_198607.1    | 4930572J05RIK    | 0.852667766 |
| ILMN_1229577 | NM_009217.1    | SSTR2            | 0.85189457  |
| ILMN_1227627 | NM_025999.1    | RNF141           | 0.851877098 |
| ILMN_2753979 | NM_001039103.2 | RASA4            | 0.848149629 |
| ILMN_2691567 | NM_026601.1    | HYI              | 0.846487793 |
| ILMN_2676074 | XM_001479341.1 | LOC100047905     | 0.842065643 |
| ILMN_3094853 | NM_008863.3    | PKIB             | 0.841073969 |
| ILMN_1229687 | NM_025999.2    | RNF141           | 0.838273871 |
| ILMN_2497067 | NM_144516.1    | ZMYND11          | 0.837702178 |
| ILMN_2606990 | NM_023066.2    | ASPH             | 0.836516995 |
| ILMN_2595732 | XM_001475817.1 | LOC100046232     | 0.826229618 |
| ILMN_1246301 | BC019166.1     | SCL0002275.1_1   | 0.826149947 |
| ILMN_1251750 |                | 2810031B20RIK    | 0.825088528 |
| ILMN_2440059 | AF390178.1     | SCL0001533.1_63  | 0.823118423 |
| ILMN_1216239 | NM_001081213.1 | ERMP1            | 0.822502205 |
| ILMN_2815802 | NM_199302.1    | LRSAM1           | 0.820939132 |
| ILMN_2715304 | NM_026267.1    | NECAP1           | 0.818511919 |
| ILMN_1217931 | NM_009462.1    | USP10            | 0.817847516 |
| ILMN_2610309 | XR_033125.1    | LOC100047009     | 0.817844084 |
| ILMN_2598532 | XM_484670.5    | EG433144         | 0.815089713 |
| ILMN_2428782 |                | SCL0003328.1_225 | 0.814668948 |
| ILMN_2651137 | NM_010693.1    | LCK              | 0.812483415 |
| ILMN_1237527 | NM_021525.2    | RCL1             | 0.806676499 |
| ILMN_2966162 | NM_178936.3    | TMEM56           | 0.805142089 |
| ILMN_2742778 | NM_028032.1    | PPP2R2A          | 0.804296532 |
| ILMN_2610771 | NM_001047159.1 | NET1             | 0.80242051  |

|              |                |               |             |
|--------------|----------------|---------------|-------------|
| ILMN_2626547 | NM_016881.2    | PMM2          | 0.802294425 |
| ILMN_1223044 | XM_976860.1    | LOC665427     | 0.801291854 |
| ILMN_1219304 | NM_001012638.1 | ACD           | 0.801143178 |
| ILMN_1219568 | NM_016881.2    | PMM2          | 0.79984672  |
| ILMN_1217993 | NM_080471.2    | ANKRD6        | 0.798933767 |
| ILMN_1251995 |                | TTL4          | 0.791708548 |
| ILMN_3138674 | NM_009637.3    | AEBP2         | 0.791563144 |
| ILMN_2733492 | XM_911470.2    | DDHD2         | 0.791435921 |
| ILMN_1259075 | NM_138314.2    | NME7          | 0.786759788 |
| ILMN_2598402 | NM_001081009.1 | PARP8         | 0.785653511 |
| ILMN_2745614 | NM_025459.2    | 1810015C04RIK | 0.784128923 |
| ILMN_1230959 | NM_001005788.2 | ZFP69         | 0.781921179 |
| ILMN_2890515 | NM_008741.1    | NSG2          | 0.781337001 |
| ILMN_3106388 | NM_001080118.1 | MED1          | 0.780852261 |
| ILMN_2699645 | NM_194054.2    | RTN4          | 0.780435701 |
| ILMN_2626252 | NM_007717.1    | CMAH          | 0.780192599 |
| ILMN_1216473 | NM_029582.2    | TXNDC11       | 0.780179687 |
| ILMN_2677712 | NM_007480.1    | ARF5          | 0.779482235 |
| ILMN_2674351 | NM_010332.2    | EDNRA         | 0.777633218 |
| ILMN_2728584 | XM_128981.2    | HAK-PENDING   | 0.777566477 |
| ILMN_2970879 | NM_016723.1    | UCHL3         | 0.777270172 |
| ILMN_1241414 |                | 4930429A08RIK | 0.775163191 |
| ILMN_2681604 | NM_001038998.1 | CCDC23        | 0.774397218 |
| ILMN_2797061 | NM_033268.3    | ACTN2         | 0.768861742 |
| ILMN_2680540 | NM_011829.2    | IMPDH1        | 0.763560256 |
| ILMN_2454204 |                | TNFRSF22      | 0.76326443  |
| ILMN_1259133 |                | 9430088P09RIK | 0.763153572 |
| ILMN_1251005 | NM_026942.2    | STOML1        | 0.761324698 |
| ILMN_2630459 | NM_009911.2    | CXCR4         | 0.759063092 |
| ILMN_1222385 | NM_145436.2    | CDC27         | 0.75803625  |
| ILMN_1215434 | NM_013910.2    | FBXL10        | 0.757685804 |
| ILMN_1245979 | XM_355907.1    | LOC381891     | 0.756748447 |
| ILMN_1213014 | NM_009471.2    | UMPS          | 0.746768701 |
| ILMN_1259905 | NM_001093753.1 | SFRS11        | 0.746033582 |
| ILMN_1231181 | NM_025664.5    | SNX9          | 0.744773212 |
| ILMN_1240537 | NM_028755.2    | ARPP21        | 0.744756813 |
| ILMN_1259754 | NM_011278.3    | RNF4          | 0.740110101 |
| ILMN_1222243 | NM_148928.1    | GTF3C5        | 0.739510291 |
| ILMN_2606072 | NM_010472.2    | HRB           | 0.736097141 |
| ILMN_1246471 | NM_009431.2    | CTR9          | 0.73377977  |
| ILMN_3102035 | NM_010488.3    | ELAVL4        | 0.733742371 |
| ILMN_1246034 | NM_153160.3    | ZCCHC17       | 0.7325241   |
| ILMN_2506144 | NM_019806.5    | VAPB          | 0.731825205 |
| ILMN_2759945 | NM_011203.2    | PTPN12        | 0.731561435 |
| ILMN_3116935 | NM_177584.3    | BTLA          | 0.731282721 |
| ILMN_2726515 | NM_134012.2    | MBTD1         | 0.730300587 |



|              |                |               |             |
|--------------|----------------|---------------|-------------|
| ILMN_2717176 | NM_016846.3    | RGL1          | 0.729741885 |
| ILMN_2668805 | NM_011484.2    | STAM          | 0.728338312 |
| ILMN_2950622 | NM_008113.3    | ARHGDIG       | 0.726262315 |
| ILMN_3072536 | NM_173363.4    | EIF5          | 0.720450625 |
| ILMN_2740464 | NM_008364.1    | IL1RAP        | 0.717647863 |
| ILMN_1255648 | NM_007782.1    | CSF3R         | 0.717299177 |
| ILMN_1221516 | XM_001479117.1 | LOC100048841  | 0.713490774 |
| ILMN_1242286 | NM_001081213.1 | ERMP1         | 0.712533524 |
| ILMN_2617499 | NM_025900.1    | DEK           | 0.712509407 |
| ILMN_2524699 | XM_135109.4    | 9430077D24RIK | 0.711029546 |
| ILMN_2803399 | NM_008567.1    | MCM6          | 0.707432598 |
| ILMN_1222584 | NM_001093753.1 | SFRS11        | 0.706310436 |
| ILMN_2526918 | NM_001005508.1 | ARHGAP30      | 0.705730605 |
| ILMN_1233380 | XM_358815.1    | LOC385634     | 0.705114737 |
| ILMN_2942082 | NM_011226.1    | RAB19         | 0.70487986  |
| ILMN_3154419 | NM_133200.3    | P2RY14        | 0.703869878 |
| ILMN_2604556 | NM_008802.1    | PDE7A         | 0.698697616 |
| ILMN_2615601 | NM_028776.4    | SCYL3         | 0.695509546 |
| ILMN_2709935 | NM_019796.4    | SYNCRIP       | 0.695275176 |
| ILMN_2685873 | NM_153167.2    | WDR32         | 0.694084885 |
| ILMN_1221458 | NM_029074.2    | TMEM188       | 0.689824725 |
| ILMN_2747735 | NM_133704.4    | SEC22A        | 0.687872472 |
| ILMN_3102643 | NM_011561.1    | TDG           | 0.684967475 |
| ILMN_2675170 | NM_178089.2    | HNRPUL1       | 0.6834871   |
| ILMN_2752569 | NM_145457.3    | PAIP1         | 0.682302209 |
| ILMN_2538092 | XM_359051.1    | LOC386067     | 0.681832014 |
| ILMN_2541190 | XM_912953.3    | 1500034J01RIK | 0.679995194 |
| ILMN_1249930 |                | ATP6V0A2      | 0.679762781 |
| ILMN_1247762 | NM_013832.3    | RASAL1        | 0.678173509 |
| ILMN_2717975 | NM_009331.3    | TCF7          | 0.676942305 |
| ILMN_1215213 | NM_001040396.2 | 2810407C02RIK | 0.67330091  |
| ILMN_1232495 | XM_001471637.1 | LOC100044177  | 0.667981728 |
| ILMN_2695819 | NM_030143.3    | DDIT4L        | 0.666724899 |
| ILMN_2648397 | NM_021505.2    | ANAPC5        | 0.663359412 |
| ILMN_1258943 | NM_026303.1    | ALKBH8        | 0.656426797 |
| ILMN_2782663 | NM_177727.2    | LSM14B        | 0.656202706 |
| ILMN_2436183 | NM_021399.2    | BCL11B        | 0.655778747 |
| ILMN_2599072 | NM_009820.3    | RUNX2         | 0.654470432 |
| ILMN_2626740 |                | TBP           | 0.654342242 |
| ILMN_2589039 | NM_053071.2    | COX6C         | 0.652910417 |
| ILMN_2608429 | NM_013477.3    | ATP6V0D1      | 0.649376004 |
| ILMN_2632206 | NM_022000.2    | GNAS          | 0.649116373 |
| ILMN_1244768 | NM_009275.4    | SRPRB         | 0.645592308 |
| ILMN_1239464 |                | C030027H14RIK | 0.643166313 |
| ILMN_1227988 |                | WINS2         | 0.63975011  |
| ILMN_1213591 |                | AES           | 0.638023769 |

|              |                |               |             |
|--------------|----------------|---------------|-------------|
| ILMN_2452237 | NM_021884.3    | TSG101        | 0.637564793 |
| ILMN_3151722 | NM_019671.2    | NET1          | 0.637355721 |
| ILMN_2588391 | NM_183423.1    | PLA2G12A      | 0.631165394 |
| ILMN_2598703 | NM_010509.1    | IFNAR2        | 0.629964427 |
| ILMN_2623712 | NM_009353.2    | TERF2         | 0.629123633 |
| ILMN_2756943 | NM_011519.1    | SDC1          | 0.623436043 |
| ILMN_2678400 | NM_133766.1    | C920006C10RIK | 0.620018243 |
| ILMN_2666101 | NR_001581.2    | SPEER6-PS1    | 0.614138216 |
| ILMN_2971514 | NM_010509.1    | IFNAR2        | 0.611340776 |
| ILMN_2444316 | NM_022314.2    | TPM3          | 0.611197696 |
| ILMN_1222167 | NM_001039195.1 | GRIA2         | 0.607939342 |
| ILMN_2636463 | NM_013685.2    | TCF4          | 0.605758808 |
| ILMN_2616772 | XM_891220.2    | SLC39A9       | 0.605136636 |
| ILMN_2722081 | NM_007711.2    | CLCN3         | 0.602577799 |
| ILMN_2651273 | NM_011396.2    | SLC22A5       | 0.60217761  |
| ILMN_2492377 | NM_023230.2    | UBE2V1        | 0.600209265 |
| ILMN_2752873 | NM_010708.1    | LGALS9        | 0.599770173 |
| ILMN_1243082 | NM_029679.1    | 6330500D04RIK | 0.590137094 |
| ILMN_1224658 | NM_016962.1    | SPAST         | 0.589741434 |
| ILMN_2639714 | NM_030197.1    | 2700078E11RIK | 0.58621884  |
| ILMN_2686183 | NM_025735.1    | MAP1LC3A      | 0.577615008 |
| ILMN_1233784 | NM_001008498.2 | WDR34         | 0.577213343 |
| ILMN_2557387 |                | E430005I09RIK | 0.574362246 |
| ILMN_1225373 | NM_007573.2    | C1QBP         | 0.570578872 |
| ILMN_2671447 | NM_011232.2    | RAD1          | 0.570078716 |
| ILMN_2422687 | XM_001477026.1 | LOC100046895  | 0.569019856 |
| ILMN_2436890 |                | DHRX          | 0.568853564 |
| ILMN_2593293 | XM_133979.7    | PPFIA1        | 0.5684772   |
| ILMN_2783438 | NM_133761.2    | DCP1A         | 0.565483108 |
| ILMN_1256824 | NM_173398.2    | GPR171        | 0.558385898 |
| ILMN_2501489 | NM_009515.1    | WAS           | 0.557852764 |
| ILMN_1220051 | NM_001080130.1 | TMPO          | 0.557026914 |
| ILMN_1226402 | XM_284733.2    | LOC331507     | 0.556735547 |
| ILMN_1244310 | NM_001033288.3 | GM106         | 0.555376024 |
| ILMN_1220726 | NM_009122.1    | SATB1         | 0.553176699 |
| ILMN_2745433 | NM_026170.3    | ERGIC1        | 0.551354624 |
| ILMN_2769210 | NM_016962.1    | SPAST         | 0.550231683 |
| ILMN_2782964 | NM_008813.2    | ENPP1         | 0.54783026  |
| ILMN_1222084 | NM_080726.3    | REM2          | 0.546315541 |
| ILMN_2816180 | NM_029999.3    | LBH           | 0.546294301 |
| ILMN_2423999 | NM_144516.1    | ZMYND11       | 0.539985327 |
| ILMN_2941972 | NM_001029876.1 | AK122209      | 0.539570326 |
| ILMN_2603178 | NM_009360.4    | TFAM          | 0.536921477 |
| ILMN_3150963 | NM_175833.1    | CDV3          | 0.532170015 |
| ILMN_2637757 | NM_008250.1    | HLX           | 0.531090854 |
| ILMN_2805829 | NM_144886.1    | EXOSC2        | 0.530811971 |

|              |                |               |             |
|--------------|----------------|---------------|-------------|
| ILMN_2537068 | XM_357429.1    | LOC384104     | 0.527019626 |
| ILMN_2704165 | NM_153064.4    | NDUFS2        | 0.520839753 |
| ILMN_1231217 | NM_020267.2    | TRIM44        | 0.516038883 |
| ILMN_3163027 | NM_145421.1    | D10BWG1364E   | 0.51245976  |
| ILMN_2697270 | NM_019575.4    | SCAMP4        | 0.508333814 |
| ILMN_2683822 | NM_019706.2    | RNF138        | 0.50759269  |
| ILMN_2630789 | NM_080471.3    | ANKRD6        | 0.506189415 |
| ILMN_2684667 | NM_026958.2    | 1810035L17RIK | 0.498260827 |
| ILMN_2592093 | NM_018854.3    | IFT20         | 0.495040755 |
| ILMN_1225666 | NM_025426.2    | MED7          | 0.489738954 |
| ILMN_1248079 | NM_172700.2    | ZMPSTE24      | 0.480849706 |
| ILMN_2511953 | NM_134131.1    | TNFAIP8       | 0.475210037 |
| ILMN_3148550 | NM_001035122.2 | GOLM1         | 0.469980212 |
| ILMN_1218725 |                | 1110002E23RIK | 0.469400704 |
| ILMN_2734712 | NM_001012396.2 | PTPLA         | 0.456197982 |
| ILMN_2715328 | NM_053268.2    | RASA2         | 0.449554858 |
| ILMN_1247814 | NM_010247.2    | XRCC6         | 0.438919742 |
